# Supplementary material for: TRIM24 controls induction of latent HIV-1 by stimulating transcriptional elongation
Source: Commun Biol. 2023 Jan 23;6:86. doi: 10.1038/s42003-023-04484-z (PMC9870992; doi:10.1038/s42003-023-04484-z)
Supplement: Supplementary file 4 — Supplementary Data 2 [file 42003_2023_4484_MOESM4_ESM.xlsx]

## Sheet: RTK3 (TRIM24 knockout) DEG
Gene ID	Mean normalized counts	FC log2	log2 FC standard error	Wald statistic	p-value	Adjusted p-value
RASEF	207.378	-3.62969	0.154034	-23.5643	8.96132e-123	5.31992e-120
ALDOC	2057.31	-3.30442	0.0602405	-54.8538	0	0
GFRA1	149.703	-3.13203	0.158692	-19.7366	1.04662e-86	2.83414e-84
CXCL10	115.703	-3.06469	0.169316	-18.1005	3.16065e-73	6.68282e-71
CPA4	106.812	-2.89763	0.171982	-16.8484	1.07728e-63	2.07847e-61
GAS2	87.3317	-2.82901	0.177584	-15.9305	3.89276e-57	6.53094e-55
KRT9	66.0061	-2.61548	0.184008	-14.2139	7.50711e-46	8.58313e-44
CA9	96.0736	-2.52338	0.170326	-14.815	1.17126e-49	1.54516e-47
MAP7D2	124.327	-2.51423	0.158081	-15.9047	5.87639e-57	9.64916e-55
GLRB	85.9956	-2.46889	0.172988	-14.2721	3.26781e-46	3.76408e-44
MEF2C	44.7755	-2.38189	0.189385	-12.577	2.82698e-36	2.27263e-34
PDGFC	49.2702	-2.34784	0.187808	-12.5013	7.34811e-36	5.78664e-34
SPRY2	371.913	-2.3106	0.103772	-22.266	7.88713e-110	3.58053e-107
AMOTL1	95.6945	-2.24493	0.165775	-13.542	8.83097e-42	9.02689e-40
MGAT3	73.3936	-2.14209	0.176037	-12.1684	4.57899e-34	3.3785e-32
GPR174	182.487	-2.08561	0.133853	-15.5813	9.75597e-55	1.49092e-52
ANO9	113.132	-2.07984	0.161218	-12.9008	4.45598e-38	3.82101e-36
GFI1	466.77	-1.96833	0.0936494	-21.018	4.48628e-98	1.64871e-95
PERP	84.2758	-1.96237	0.169307	-11.5906	4.59765e-31	2.92036e-29
CXCL3	156.984	-1.9571	0.138275	-14.1537	1.77188e-45	1.99628e-43
GATA2	169.302	-1.92345	0.134618	-14.2882	2.59218e-46	3.0083e-44
SLCO3A1	432.446	-1.89491	0.0942239	-20.1107	5.94799e-90	1.80014e-87
GPR84	58.9618	-1.88576	0.180229	-10.4632	1.27544e-25	6.33001e-24
DBH-AS1	306.427	-1.81822	0.106968	-16.9978	8.52995e-65	1.68795e-62
PDE10A	62.8046	-1.81585	0.179024	-10.1431	3.55744e-24	1.62935e-22
CXCR4	1019.81	-1.81334	0.0704145	-25.7523	3.03703e-146	2.46719e-143
DPF3	170.007	-1.78154	0.132379	-13.4579	2.76665e-41	2.77294e-39
AGPAT3	265.972	-1.76152	0.114825	-15.3408	4.07996e-53	5.88543e-51
DBH	173.655	-1.76006	0.133857	-13.1489	1.72734e-39	1.58699e-37
KLF3	66.7204	-1.71175	0.174715	-9.79734	1.15587e-22	4.91482e-21
ANXA5	262.645	-1.70401	0.11222	-15.1846	4.47346e-52	6.33467e-50
FHDC1	40.3213	-1.67975	0.187844	-8.94228	3.81216e-19	1.37478e-17
FSCN1	178.674	-1.6568	0.129842	-12.7602	2.73614e-37	2.28283e-35
UBXN10	210.486	-1.61264	0.122933	-13.118	2.59658e-39	2.34376e-37
TNFSF10	1601.89	-1.60485	0.057113	-28.0995	9.9418e-174	1.02301e-170
DNTT	157.062	-1.59342	0.133962	-11.8946	1.26315e-32	8.70389e-31
ALDH1A2	1752.79	-1.59191	0.0526791	-30.219	1.33486e-200	1.87305e-197
ID3	612.174	-1.57778	0.0818352	-19.28	7.90424e-83	2.00003e-80
FGF13	22.9979	-1.57468	0.18948	-8.31051	9.52895e-17	2.87827e-15
ATP2B2	216.54	-1.55526	0.12081	-12.8735	6.34369e-38	5.40966e-36
LOC101059954	31.0364	-1.5313	0.190874	-8.02258	1.03547e-15	2.90592e-14
TLR9	45.1308	-1.52873	0.186059	-8.21638	2.09731e-16	6.18968e-15
KRT17	35.3942	-1.52589	0.189482	-8.05294	8.08289e-16	2.29337e-14
KLF9	258.121	-1.49808	0.11217	-13.3554	1.10142e-40	1.04941e-38
PTPN3	305.283	-1.47273	0.10422	-14.131	2.44756e-45	2.71784e-43
PREX2	33.5164	-1.45643	0.190009	-7.66508	1.78717e-14	4.52955e-13
RGS3	934.726	-1.45474	0.0663725	-21.9178	1.75768e-106	7.33236e-104
CDYL2	98.624	-1.45237	0.156947	-9.25392	2.16411e-20	8.35076e-19
PTCH1	38.7686	-1.44878	0.189043	-7.66375	1.80579e-14	4.56925e-13
GJB2	42.4077	-1.43641	0.187154	-7.67501	1.65412e-14	4.22704e-13
ISM1	193.343	-1.43214	0.124836	-11.4721	1.8214e-30	1.11561e-28
GZMA	78.9455	-1.40533	0.164289	-8.55404	1.18858e-17	3.86227e-16
REPIN1	1664.96	-1.39609	0.0560385	-24.9131	5.36559e-137	4.14089e-134
ADAMTS17	56.8438	-1.37601	0.176473	-7.79732	6.32379e-15	1.66282e-13
MDGA1	54.6957	-1.37442	0.17919	-7.67019	1.71747e-14	4.36724e-13
TNS4	85.0325	-1.37423	0.161376	-8.51573	1.65539e-17	5.26825e-16
DSP	19.1477	-1.36203	0.188338	-7.23184	4.76481e-13	1.06587e-11
DUSP4	95.4586	-1.35774	0.158775	-8.55136	1.21648e-17	3.93635e-16
WWC3	239.916	-1.35379	0.114437	-11.83	2.73236e-32	1.83365e-30
BZRAP1	6199.69	-1.34024	0.0827411	-16.198	5.2089e-59	9.03363e-57
HRASLS5	36.7462	-1.34023	0.188018	-7.12817	1.01712e-12	2.20806e-11
CDK14	112.548	-1.33967	0.153853	-8.70745	3.10786e-18	1.04056e-16
PRL	43.1953	-1.33191	0.185404	-7.18382	6.7791e-13	1.49908e-11
DOCK5	26.2807	-1.3244	0.191151	-6.92855	4.25171e-12	8.6691e-11
FASLG	741.161	-1.30898	0.0732943	-17.8592	2.45108e-71	4.97795e-69
SLCO4C1	28.7376	-1.30799	0.191035	-6.84685	7.5495e-12	1.51925e-10
ARHGAP25	105.371	-1.30493	0.150309	-8.68166	3.90025e-18	1.30022e-16
ADAMTS19	18.0891	-1.30334	0.187596	-6.94758	3.71595e-12	7.60686e-11
TRG-AS1	270.72	-1.29983	0.108612	-11.9677	5.24925e-33	3.75103e-31
ASAP2	38.7826	-1.29748	0.18767	-6.91364	4.72374e-12	9.60617e-11
NAV1	72.0613	-1.28486	0.172629	-7.44289	9.85036e-14	2.33191e-12
TNFRSF10A	48.2555	-1.28399	0.181514	-7.07377	1.50785e-12	3.21459e-11
EPAS1	321.004	-1.275	0.10464	-12.1846	3.75505e-34	2.7865e-32
ZNF891	17.1091	-1.2734	0.186316	-6.83463	8.22193e-12	1.64599e-10
ADRA2B	441.943	-1.26103	0.157292	-8.01716	1.08221e-15	3.03155e-14
BCL2L11	1290.51	-1.23959	0.0589222	-21.0377	2.9658e-98	1.11651e-95
WWC2	61.7072	-1.23396	0.174369	-7.07673	1.4759e-12	3.15958e-11
RGS16	506.095	-1.23327	0.0846971	-14.561	4.97233e-48	6.23966e-46
C16orf54	71.1671	-1.22754	0.171223	-7.16921	7.54293e-13	1.65377e-11
AMOTL2	63.2441	-1.2245	0.174961	-6.99868	2.58377e-12	5.38199e-11
CD9	360.169	-1.21988	0.0969058	-12.5883	2.44959e-36	1.97955e-34
SYN2	24.9828	-1.21925	0.19117	-6.37786	1.79585e-10	3.16066e-09
CDH2	28.3009	-1.21728	0.190978	-6.37396	1.84215e-10	3.23108e-09
SGK1	508.97	-1.21245	0.0873881	-13.8743	9.07113e-44	9.72312e-42
VWA5B2	329.155	-1.20405	0.101019	-11.919	9.4216e-33	6.61011e-31
NPIPB11	97.4311	-1.20212	0.154949	-7.75819	8.61529e-15	2.24623e-13
PTPN14	67.8639	-1.1913	0.16993	-7.01055	2.37377e-12	4.96466e-11
CHRNA3	343.093	-1.173	0.103273	-11.3583	6.7424e-30	4.03368e-28
LPAR5	250.358	-1.17078	0.10996	-10.6473	1.7944e-26	9.29415e-25
COLCA1	116.108	-1.16801	0.149129	-7.83221	4.7935e-15	1.27785e-13
ASTL	274.499	-1.16742	0.119437	-9.77432	1.45132e-22	6.13728e-21
CD19	44.0411	-1.16704	0.183446	-6.36177	1.99443e-10	3.47842e-09
PVRL3	70.2763	-1.16251	0.166973	-6.96227	3.34835e-12	6.9001e-11
ZEB2	373.138	-1.16239	0.0937742	-12.3956	2.75956e-35	2.16212e-33
MAP7	43.2573	-1.15443	0.184739	-6.24895	4.1321e-10	6.93249e-09
SSH3	54.2591	-1.15176	0.177997	-6.47067	9.7569e-11	1.76344e-09
SH3TC1	694.934	-1.15028	0.0770915	-14.921	2.40638e-50	3.28694e-48
VASP	3711.72	-1.14973	0.0428865	-26.8086	2.56449e-158	2.3284e-155
TK2	433.711	-1.14805	0.0945421	-12.1433	6.22891e-34	4.55655e-32
UGT3A2	107.485	-1.14576	0.149324	-7.67298	1.68042e-14	4.28716e-13
CHRDL1	27.411	-1.13855	0.190941	-5.96286	2.47856e-09	3.7617e-08
MYEOV	38.2258	-1.13708	0.18676	-6.08843	1.14021e-09	1.80319e-08
PRDM8	1305.92	-1.13446	0.0621563	-18.2518	2.0029e-74	4.3542e-72
SOCS1	404.175	-1.12929	0.0948181	-11.9101	1.04835e-32	7.28889e-31
PHLDB2	96.9137	-1.12011	0.154736	-7.23883	4.52588e-13	1.01389e-11
PGBD5	345.835	-1.11407	0.0986802	-11.2897	1.47549e-29	8.72573e-28
KCNA6	22.7908	-1.1086	0.191019	-5.80362	6.48982e-09	9.41451e-08
MYB	2191.96	-1.09827	0.0472648	-23.2366	1.94196e-119	1.07051e-116
ZCCHC5	17.691	-1.09174	0.187196	-5.83208	5.47419e-09	7.98622e-08
HDAC9	30.9933	-1.08885	0.189737	-5.73873	9.53912e-09	1.35702e-07
PTCRA	15.1109	-1.08847	0.182911	-5.95085	2.66748e-09	4.03257e-08
APOLD1	208.865	-1.08196	0.11856	-9.12586	7.11707e-20	2.66631e-18
CXXC4	13.4027	-1.08093	0.180887	-5.97572	2.29081e-09	3.48705e-08
OSGIN1	342.562	-1.07992	0.101027	-10.6895	1.14037e-26	5.92647e-25
CECR6	131.379	-1.07727	0.139615	-7.71601	1.20028e-14	3.10324e-13
CASP1	40.6962	-1.07587	0.185631	-5.79575	6.80149e-09	9.84812e-08
CD1C	609.429	-1.07115	0.0791998	-13.5247	1.11851e-41	1.1358e-39
AKAP7	66.7377	-1.07065	0.169688	-6.30953	2.79885e-10	4.81608e-09
LEF1	1913.85	-1.06684	0.0491923	-21.6872	2.70929e-104	1.07225e-101
FAM149A	18.9269	-1.06358	0.18914	-5.62326	1.8739e-08	2.56807e-07
ZNF140	14.0803	-1.05685	0.182402	-5.79408	6.86966e-09	9.9282e-08
CCDC78	283.079	-1.05518	0.109336	-9.65074	4.88039e-22	2.03043e-20
ICK	112.774	-1.0516	0.148034	-7.10378	1.21388e-12	2.61679e-11
ADCY10P1	142.968	-1.04804	0.136095	-7.70076	1.35255e-14	3.46787e-13
LOC101928707	187.839	-1.04386	0.123987	-8.4191	3.79391e-17	1.17118e-15
ARHGEF39	137.447	-1.04315	0.137702	-7.57544	3.57915e-14	8.79685e-13
ZFPM1	391.581	-1.04267	0.0961779	-10.841	2.2003e-27	1.17922e-25
PTGS1	27.9343	-1.03728	0.190843	-5.43524	5.47228e-08	7.02116e-07
RHOB	186.046	-1.03597	0.123006	-8.4221	3.69804e-17	1.14848e-15
CLDN1	65.7442	-1.03364	0.169444	-6.10021	1.05928e-09	1.67692e-08
DSE	56.5394	-1.03275	0.176248	-5.85967	4.63801e-09	6.84395e-08
TOX2	13.3587	-1.02907	0.180489	-5.70157	1.18712e-08	1.6703e-07
WT1	79.8229	-1.02007	0.165481	-6.16427	7.08098e-10	1.15169e-08
ARL4C	563.489	-1.01845	0.081319	-12.5242	5.50719e-36	4.35915e-34
NHSL2	163.535	-1.01449	0.130543	-7.77128	7.76975e-15	2.03264e-13
DYSF	389.005	-1.01438	0.0946109	-10.7216	8.06138e-27	4.23223e-25
ID1	742.184	-1.01178	0.0703186	-14.3885	6.10883e-47	7.30928e-45
GRB10	27.8847	-1.0082	0.190885	-5.2817	1.27991e-07	1.56046e-06
C21orf67	416.957	-1.00354	0.0935413	-10.7283	7.49674e-27	3.94922e-25
CILP2	33.779	-1.00231	0.188548	-5.31594	1.06109e-07	1.30919e-06
MAGEB17	37.3316	-1.00183	0.186598	-5.36891	7.92145e-08	9.92431e-07
TBX1	20.2502	-0.997972	0.190283	-5.24468	1.56557e-07	1.88198e-06
SLFN5	312.917	-0.995616	0.100964	-9.86114	6.13464e-23	2.63755e-21
SPN	3843.45	-0.99377	0.0431575	-23.0266	2.52526e-117	1.34405e-114
RNR1	11384.6	-0.979792	0.104129	-9.40945	4.9876e-21	2.00478e-19
ZNF704	58.937	-0.9783	0.175877	-5.56242	2.66063e-08	3.57725e-07
TEAD1	250.77	-0.974832	0.114004	-8.55084	1.22193e-17	3.94571e-16
SPINK2	166.32	-0.974649	0.129673	-7.51621	5.6385e-14	1.36411e-12
PLEKHG4B	90.5784	-0.969704	0.155145	-6.25032	4.09622e-10	6.88728e-09
RCSD1	451.262	-0.969347	0.0874414	-11.0857	1.47238e-28	8.23415e-27
ATP6V0A4	202.539	-0.968335	0.120814	-8.01508	1.10062e-15	3.07756e-14
GSS	1047	-0.96826	0.0652955	-14.8289	9.52901e-50	1.26793e-47
SIGLEC12	22.7335	-0.96804	0.190822	-5.07299	3.91607e-07	4.41523e-06
SLC8A2	91.636	-0.96715	0.163776	-5.90532	3.51967e-09	5.23877e-08
PDE4C	51.9571	-0.966984	0.177256	-5.45529	4.88927e-08	6.31514e-07
LONRF2	286.025	-0.962426	0.115253	-8.35057	6.79361e-17	2.06416e-15
CHST2	1721.96	-0.955469	0.0525813	-18.1713	8.71584e-74	1.86846e-71
IKZF1	3329.37	-0.954311	0.0459807	-20.7546	1.11451e-95	3.90964e-93
FAM46C	270.633	-0.953919	0.106469	-8.95956	3.25979e-19	1.1811e-17
XPNPEP2	11.4989	-0.947686	0.176485	-5.36979	7.88264e-08	9.88371e-07
LPIN3	16.672	-0.947533	0.186985	-5.06744	4.03205e-07	4.53606e-06
RRN3P1	209.519	-0.947138	0.115964	-8.16751	3.14815e-16	9.13377e-15
TSHR	45.3943	-0.946928	0.183442	-5.16201	2.44317e-07	2.86771e-06
ATP9A	1159.37	-0.946513	0.0641358	-14.7579	2.73503e-49	3.5475e-47
CCKBR	22.681	-0.945537	0.191106	-4.9477	7.50948e-07	8.07164e-06
FAM95A	17.5218	-0.945004	0.188964	-5.00096	5.70444e-07	6.25786e-06
SLIT1	703.948	-0.94369	0.0748712	-12.6042	2.00278e-36	1.62699e-34
APOBR	76.4822	-0.939942	0.163625	-5.74449	9.2201e-09	1.31406e-07
RP11-475N22.4	12.9374	-0.934149	0.179961	-5.19083	2.09354e-07	2.47088e-06
STYK1	22.2641	-0.931898	0.191096	-4.87661	1.07927e-06	1.11952e-05
ADORA2A	288.421	-0.929623	0.108869	-8.53894	1.3546e-17	4.34682e-16
TRPV3	58.4261	-0.929529	0.172487	-5.389	7.08519e-08	8.93464e-07
EFNA2	29.4999	-0.928397	0.190167	-4.88201	1.05008e-06	1.09145e-05
UBE2E2	225.212	-0.92445	0.119327	-7.74722	9.3926e-15	2.44065e-13
SARDH	650.607	-0.922855	0.0744647	-12.3932	2.84465e-35	2.21753e-33
LSAMP	140.12	-0.919815	0.135171	-6.80481	1.01181e-11	2.00737e-10
GPR50	11.879	-0.91853	0.178556	-5.14422	2.68639e-07	3.11998e-06
TNRC6C-AS1	598.371	-0.91836	0.0788834	-11.642	2.52079e-31	1.62118e-29
CD300A	27.9655	-0.916789	0.190961	-4.80092	1.57938e-06	1.59332e-05
GAD1	71.3575	-0.916333	0.165206	-5.5466	2.91277e-08	3.89927e-07
FAM129A	681.507	-0.915612	0.0741311	-12.3513	4.79596e-35	3.64659e-33
GOLM1	328.878	-0.912699	0.0967468	-9.43389	3.95142e-21	1.5966e-19
CEBPE	38.511	-0.911351	0.186222	-4.8939	9.88546e-07	1.03586e-05
PKDREJ	34.9419	-0.90747	0.189014	-4.80108	1.57816e-06	1.59312e-05
PLXNC1	162.863	-0.905595	0.131017	-6.91204	4.77725e-12	9.70222e-11
PHEX	329.391	-0.903979	0.0998761	-9.051	1.4166e-19	5.24345e-18
SNCA	17.6983	-0.899829	0.187217	-4.80635	1.53714e-06	1.55477e-05
XAB2	1987.34	-0.898233	0.0542976	-16.5428	1.80514e-61	3.20257e-59
PNCK	22.7048	-0.897663	0.191015	-4.69943	2.60892e-06	2.55152e-05
AP3B1	594.032	-0.895786	0.0789501	-11.3462	7.74369e-30	4.61482e-28
MCTP1	40.6537	-0.894951	0.183996	-4.86398	1.15049e-06	1.18782e-05
SIT1	694.951	-0.89175	0.0741178	-12.0315	2.42638e-33	1.75006e-31
RAB7B	812.356	-0.88953	0.0698819	-12.729	4.07781e-37	3.36583e-35
USP20	2517.85	-0.887839	0.0470354	-18.876	1.798e-79	4.0812e-77
PAK6	27.8649	-0.887486	0.190716	-4.65346	3.26417e-06	3.1313e-05
DAB2	26.9533	-0.883993	0.191158	-4.62442	3.75645e-06	3.55057e-05
SLC9A2	116.074	-0.883543	0.143699	-6.14856	7.8188e-10	1.2637e-08
HOXD8	80.602	-0.881387	0.163427	-5.39314	6.92358e-08	8.75229e-07
PAGE4	12.4271	-0.878617	0.179794	-4.88679	1.02494e-06	1.06964e-05
BCYRN1	65.0284	-0.873459	0.172377	-5.06714	4.03827e-07	4.53975e-06
ITGB2-AS1	338.024	-0.873146	0.0972253	-8.98065	2.69181e-19	9.79909e-18
ZNF862	372.543	-0.872203	0.0935008	-9.32829	1.07589e-20	4.24716e-19
AIM2	13.8454	-0.871496	0.181091	-4.81248	1.49066e-06	1.51471e-05
RRN3P2	21.1516	-0.868553	0.190565	-4.55777	5.16995e-06	4.76407e-05
PHLDA1	3107.42	-0.867877	0.0420976	-20.6158	1.97961e-94	6.64244e-92
ETV6	109.42	-0.867016	0.148164	-5.85172	4.86521e-09	7.13827e-08
MYO1A	129.086	-0.865059	0.141739	-6.10319	1.03971e-09	1.64932e-08
PSRC1	242.936	-0.861412	0.111114	-7.75252	9.00867e-15	2.34484e-13
CREB5	79.6683	-0.859651	0.163398	-5.2611	1.432e-07	1.72949e-06
STARD13	43.0861	-0.853881	0.182664	-4.67459	2.9454e-06	2.86287e-05
FBXO43	121.085	-0.852662	0.142958	-5.96443	2.45492e-09	3.73317e-08
PPP1R3F	130.043	-0.852002	0.139645	-6.10121	1.05266e-09	1.66815e-08
DOCK9	662.445	-0.846474	0.0734712	-11.5212	1.03202e-30	6.37168e-29
CAMKK1	215.72	-0.842639	0.117357	-7.18013	6.96452e-13	1.5313e-11
TTC38	30.4736	-0.84208	0.189644	-4.44033	8.98204e-06	7.98605e-05
MIR142	101.574	-0.840789	0.167509	-5.01937	5.18413e-07	5.73189e-06
ANXA2R	68.8927	-0.831512	0.175003	-4.75141	2.02006e-06	2.00512e-05
SUSD2	30.4945	-0.830616	0.189636	-4.38007	1.18644e-05	0.000102592
QRICH2	161.648	-0.830386	0.134333	-6.18157	6.3468e-10	1.04105e-08
SNX29P2	23.4019	-0.830149	0.191169	-4.34248	1.40884e-05	0.000119218
ARID5B	212.732	-0.82722	0.118193	-6.99889	2.58006e-12	5.38152e-11
ADM	87.9174	-0.826931	0.154956	-5.33656	9.47283e-08	1.17346e-06
CD24	105.51	-0.826328	0.153098	-5.39739	6.7618e-08	8.55478e-07
EGLN3	37.3452	-0.825129	0.188018	-4.38857	1.14098e-05	9.91049e-05
LOC101927245	83.1216	-0.823897	0.164253	-5.01601	5.27558e-07	5.82048e-06
FGR	319.532	-0.821497	0.0980331	-8.37979	5.30232e-17	1.62062e-15
SOX4	1179.03	-0.819037	0.0584576	-14.0108	1.33916e-44	1.45563e-42
MYO15A	51.6113	-0.811267	0.180544	-4.49347	7.00732e-06	6.33243e-05
AMN	55.6771	-0.809086	0.175145	-4.61952	3.8463e-06	3.63105e-05
PDE4D	79.1764	-0.808751	0.161133	-5.01915	5.19013e-07	5.73441e-06
DNHD1	649.637	-0.803273	0.0898414	-8.94101	3.85639e-19	1.38426e-17
JUP	122.57	-0.800481	0.141551	-5.65506	1.55791e-08	2.15663e-07
ZMYM1	213.597	-0.799499	0.115994	-6.89259	5.47875e-12	1.10832e-10
GREB1	78.5204	-0.79665	0.161945	-4.91928	8.68647e-07	9.19586e-06
IL6R	41.2962	-0.795159	0.183542	-4.3323	1.47558e-05	0.000124253
ACSL6	329.766	-0.7951	0.0978394	-8.12658	4.41562e-16	1.27631e-14
KIAA0226L	307.784	-0.79484	0.101634	-7.82061	5.25676e-15	1.39652e-13
RP11-18H21.1	50.1296	-0.793753	0.178011	-4.45902	8.2335e-06	7.36292e-05
FTH1	17787.2	-0.793272	0.0301226	-26.3348	7.65777e-153	6.56654e-150
ANTXR2	1759.04	-0.791861	0.050641	-15.6368	4.09068e-55	6.37774e-53
LIPG	20.9642	-0.790951	0.190777	-4.14596	3.38399e-05	0.000263398
ANGPTL2	42.9737	-0.790916	0.182623	-4.33087	1.4852e-05	0.000124995
RDH10	633.518	-0.790247	0.0784009	-10.0796	6.80206e-24	3.06988e-22
PROSER2-AS1	12.37	-0.789853	0.181011	-4.36356	1.27961e-05	0.000109605
MTMR11	42.1233	-0.787061	0.183375	-4.29209	1.77003e-05	0.000146333
KDM1A	1957.24	-0.785535	0.0487829	-16.1027	2.44279e-58	4.18938e-56
KIAA1671	21.4745	-0.784784	0.190664	-4.11607	3.85393e-05	0.00029713
SPECC1	56.762	-0.783728	0.176101	-4.45045	8.56919e-06	7.6489e-05
SPIRE1	27.9693	-0.782938	0.1909	-4.10131	4.10825e-05	0.00031485
SERPINI1	138.611	-0.780179	0.135254	-5.76827	8.00901e-09	1.15102e-07
EVI5	34.1879	-0.777655	0.188132	-4.13357	3.57173e-05	0.000277312
CSRP2	52.0982	-0.777386	0.17652	-4.40395	1.06296e-05	9.30493e-05
TAC3	67.6665	-0.777003	0.169508	-4.58387	4.56454e-06	4.24676e-05
ZIC2	23.605	-0.774237	0.191159	-4.05024	5.11661e-05	0.000383002
GALNT8	11.3309	-0.773478	0.178226	-4.33986	1.42573e-05	0.000120384
KIAA1683	73.1306	-0.771313	0.166583	-4.63021	3.65296e-06	3.46839e-05
AFF3	197.277	-0.7705	0.120765	-6.38014	1.76928e-10	3.12816e-09
TNFRSF1A	1119.12	-0.768795	0.0589528	-13.0409	7.16531e-39	6.3198e-37
SLFN11	1126.67	-0.768679	0.0630218	-12.197	3.22336e-34	2.41517e-32
TTC24	140.585	-0.76705	0.135616	-5.65604	1.5491e-08	2.14635e-07
PDGFB	14.6787	-0.766808	0.184436	-4.15759	3.21625e-05	0.000251483
COL7A1	536.515	-0.763125	0.0995452	-7.66611	1.77284e-14	4.50063e-13
EPB41L4B	275.281	-0.762604	0.105263	-7.24477	4.33175e-13	9.76068e-12
44083	11118	-0.762329	0.0311942	-24.4382	6.7207e-132	4.71518e-129
KIAA1551	3043.95	-0.760379	0.0508048	-14.9667	1.21211e-50	1.67044e-48
UQCRC2	4515.67	-0.759278	0.0369776	-20.5335	1.08157e-93	3.55192e-91
DNASE1	252.959	-0.759043	0.108506	-6.99542	2.64474e-12	5.50156e-11
C6orf223	618.788	-0.757525	0.0758593	-9.98592	1.75664e-23	7.76896e-22
DGKA	1369.77	-0.756141	0.0565204	-13.3782	8.1109e-41	7.92352e-39
CSTA	35.5646	-0.756061	0.187337	-4.03583	5.44096e-05	0.000405902
C1RL-AS1	80.3994	-0.755358	0.159755	-4.72823	2.26489e-06	2.23963e-05
SPAG1	442.096	-0.753664	0.0860628	-8.75715	2.00254e-18	6.79325e-17
PRSS35	24.7869	-0.751527	0.191129	-3.93204	8.42288e-05	0.000600772
C1orf186	121.689	-0.750858	0.14381	-5.22116	1.77804e-07	2.1291e-06
SLC6A8	223.64	-0.750849	0.113878	-6.59348	4.29634e-11	8.06739e-10
ADORA2A-AS1	188.639	-0.747031	0.124127	-6.01829	1.76267e-09	2.72069e-08
TRIB1	908.911	-0.745903	0.0679557	-10.9763	4.96735e-28	2.73825e-26
GRIN3B	67.4173	-0.744808	0.168489	-4.42051	9.84685e-06	8.68244e-05
KCNJ18	27.7872	-0.742143	0.190763	-3.8904	0.000100081	0.000702477
FDPS	12376.2	-0.73998	0.0327313	-22.6077	3.63979e-113	1.87267e-110
TYMP	36.6353	-0.73722	0.187241	-3.93727	8.24136e-05	0.000589186
MMP8	18.3623	-0.736582	0.189846	-3.8799	0.0001045	0.000730839
FGD5	133.153	-0.733715	0.13895	-5.28042	1.28885e-07	1.57012e-06
SGPP2	112.717	-0.733646	0.146152	-5.01976	5.17363e-07	5.72437e-06
CD1A	433.213	-0.732321	0.0879306	-8.3284	8.1944e-17	2.48001e-15
CPT1C	41.6518	-0.732237	0.183272	-3.99536	6.45958e-05	0.000474102
EPHB6-2	95.4387	-0.731761	0.156769	-4.66776	3.04494e-06	2.94294e-05
COL9A3	20.1701	-0.730019	0.190618	-3.82976	0.000128271	0.000880719
CTRC	176.662	-0.729732	0.129472	-5.63621	1.73832e-08	2.39348e-07
KLF2	36.6739	-0.727853	0.186739	-3.89769	9.71138e-05	0.000684452
MTURN	370.746	-0.727819	0.0923515	-7.88096	3.24864e-15	8.76623e-14
TTLL9	85.8975	-0.727252	0.16498	-4.40813	1.04266e-05	9.14925e-05
ITK	4137.84	-0.72703	0.0433997	-16.7519	5.48136e-63	1.0072e-60
SCNN1A	105.7	-0.726758	0.154885	-4.69225	2.70217e-06	2.63308e-05
SUOX	75.6677	-0.726683	0.166701	-4.35919	1.30543e-05	0.000111569
MDK	92.3093	-0.725798	0.15305	-4.74224	2.1137e-06	2.09538e-05
SLA	9943.13	-0.725104	0.0311157	-23.3035	4.08982e-120	2.33801e-117
HES6	167.478	-0.723821	0.133883	-5.40639	6.43081e-08	8.16279e-07
L1CAM	138.665	-0.722985	0.135403	-5.33951	9.31968e-08	1.15634e-06
LINC00341	56.5234	-0.722284	0.173855	-4.15451	3.25985e-05	0.000254506
ZNF268	209.138	-0.720418	0.118687	-6.06988	1.28009e-09	2.01409e-08
PRF1	48.5896	-0.719836	0.17884	-4.02504	5.69668e-05	0.000424364
PTPRJ	51.855	-0.719299	0.179384	-4.00982	6.07639e-05	0.000449397
ST8SIA4	2211.17	-0.718853	0.0487437	-14.7476	3.18768e-49	4.06627e-47
C3AR1	149.2	-0.716387	0.134624	-5.32141	1.02969e-07	1.27248e-06
EOMES	2345.8	-0.716233	0.0461257	-15.5278	2.24806e-54	3.33642e-52
STON2	96.0522	-0.715567	0.150764	-4.74627	2.072e-06	2.05535e-05
SLC32A1	19.0377	-0.71487	0.189503	-3.77235	0.000161717	0.00108574
MFI2	443.654	-0.714823	0.0906522	-7.88533	3.13704e-15	8.4799e-14
ITGA6	45.6538	-0.711263	0.181472	-3.91941	8.87667e-05	0.000630517
CELA2A	15.762	-0.710253	0.187484	-3.78833	0.000151662	0.00102446
ADCY1	42.7644	-0.709879	0.185225	-3.83253	0.000126833	0.000872793
PCDH12	75.9741	-0.708945	0.163239	-4.34298	1.40562e-05	0.000119058
STAMBPL1	1026.84	-0.708585	0.0610905	-11.5989	4.17293e-31	2.66154e-29
DLGAP1-AS1	16.7224	-0.705694	0.186928	-3.77522	0.000159866	0.00107518
ATP11A	1857.16	-0.705274	0.0633024	-11.1413	7.8921e-29	4.44579e-27
ABCC5	95.4821	-0.703867	0.155272	-4.53311	5.81221e-06	5.30979e-05
CCDC62	119.616	-0.703383	0.143625	-4.89737	9.71273e-07	1.01914e-05
SLC23A1	76.7882	-0.700738	0.162412	-4.31456	1.59921e-05	0.00013321
GDPD3	64.4389	-0.70031	0.173157	-4.04436	5.24659e-05	0.00039235
TXNRD1	12947.8	-0.699273	0.035831	-19.5159	8.05031e-85	2.07094e-82
TEAD4	147.855	-0.697768	0.134387	-5.19224	2.07773e-07	2.45746e-06
LOC374443	65.4957	-0.697682	0.167451	-4.16649	3.09319e-05	0.000242599
SAMD10	217.122	-0.69652	0.118913	-5.85739	4.7019e-09	6.91839e-08
SLC2A3	882.596	-0.69583	0.0681119	-10.216	1.68169e-24	7.91369e-23
FRMD4A	418.03	-0.695605	0.0899695	-7.73156	1.06236e-14	2.75588e-13
PRKCQ	330.465	-0.695336	0.0955477	-7.27737	3.40387e-13	7.78351e-12
LHX6	14.6602	-0.694308	0.182811	-3.79796	0.000145894	0.000991579
UBE2J1	1274.34	-0.692458	0.0578672	-11.9663	5.33354e-33	3.79369e-31
ITGAE	341.733	-0.69226	0.0980787	-7.05821	1.68655e-12	3.57582e-11
C21orf58	567.801	-0.691952	0.0811066	-8.53139	1.44595e-17	4.62077e-16
ARHGAP18	48.7846	-0.691665	0.180646	-3.82884	0.000128747	0.000883206
ZNF652	71.3322	-0.69164	0.166532	-4.1532	3.27858e-05	0.00025558
KAZN	21.4517	-0.691459	0.19088	-3.62247	0.0002918	0.00182641
TMCC3	63.8899	-0.689389	0.169563	-4.06568	4.78929e-05	0.000361657
PIF1	418.904	-0.689118	0.100673	-6.84509	7.64263e-12	1.53599e-10
TUBAL3	52.6915	-0.688296	0.178497	-3.85607	0.000115224	0.000798603
MGAT4A	916.331	-0.687073	0.0655411	-10.4831	1.03326e-25	5.16128e-24
C20orf112	119.561	-0.683003	0.145376	-4.69818	2.62485e-06	2.56259e-05
PPP3CA	1370.7	-0.681185	0.0608784	-11.1893	4.60211e-29	2.64065e-27
DENND5B	50.4579	-0.681028	0.178583	-3.81352	0.000137001	0.00093733
BCOR	2966.58	-0.676479	0.0461829	-14.6478	1.39048e-48	1.75919e-46
TCEAL2	41.7082	-0.676454	0.184378	-3.66885	0.000243646	0.00155851
SLC16A13	126.7	-0.675869	0.138905	-4.86571	1.14048e-06	1.17905e-05
SSTR3	54.7498	-0.674291	0.174902	-3.85525	0.000115611	0.000800921
PPM1E	45.5398	-0.673538	0.179887	-3.74423	0.000180951	0.00120076
KCNK7	35.064	-0.672652	0.186804	-3.60084	0.000317191	0.00196778
ZC3H13	1452.87	-0.671765	0.0543112	-12.3688	3.85486e-35	2.97499e-33
CLEC2B	479.53	-0.670569	0.0858241	-7.81329	5.5714e-15	1.47351e-13
CTHRC1	82.9749	-0.669879	0.157132	-4.26317	2.01546e-05	0.000164422
RBPMS2	26.2826	-0.66819	0.190984	-3.49867	0.000467587	0.00277478
TCHH	19.9705	-0.666797	0.190538	-3.49955	0.000466046	0.0027667
SPIB	62.2382	-0.666393	0.171891	-3.87683	0.000105827	0.000739445
TREH	25.1202	-0.665652	0.191126	-3.48278	0.000496228	0.00291547
CMTM2	10.4719	-0.664912	0.175203	-3.7951	0.000147585	0.00100043
DCAF4L1	18.4367	-0.664872	0.189658	-3.50563	0.000455522	0.00271048
LRRC37A3	58.4955	-0.664491	0.171991	-3.86352	0.000111764	0.000777064
ANGPT1	19.4546	-0.664029	0.189209	-3.5095	0.000448946	0.00267754
LAT2	98.7998	-0.662565	0.152876	-4.334	1.46426e-05	0.000123367
JARID2	2881.83	-0.662444	0.0456437	-14.5134	9.969e-48	1.23097e-45
LOC102723602	68.2177	-0.661802	0.166084	-3.98476	6.75492e-05	0.000494602
PPFIBP1	417.489	-0.661322	0.0884413	-7.47752	7.57365e-14	1.81239e-12
LOC101928025	30.1103	-0.660939	0.190017	-3.47831	0.00050458	0.00295343
FRMD4B	102.137	-0.660315	0.14994	-4.40386	1.06342e-05	9.30493e-05
LDLRAP1	53.6434	-0.660165	0.177293	-3.72359	0.000196408	0.00128783
LOC399900	9.88155	-0.659591	0.173511	-3.80145	0.000143854	0.000978577
CREB3L1	31.6734	-0.657961	0.188823	-3.48453	0.000492998	0.0029032
PLTP	21.434	-0.6575	0.190898	-3.44425	0.00057265	0.00331167
CRIM1	96.8823	-0.65561	0.149935	-4.37262	1.22765e-05	0.00010586
TNFRSF10D	26.7256	-0.653571	0.190666	-3.42784	0.000608412	0.00349232
CXCL9	9.15103	-0.653457	0.171641	-3.80711	0.000140598	0.00095981
DOCK9-AS2	48.547	-0.65319	0.177805	-3.67364	0.000239124	0.00153212
CDKN2C	1337.29	-0.652607	0.0565268	-11.5451	7.81501e-31	4.90344e-29
ZNF768	117.44	-0.651614	0.145973	-4.46392	8.04719e-06	7.20885e-05
HSPG2	76.2422	-0.651523	0.16655	-3.91188	9.15805e-05	0.000649309
ADSSL1	85.3569	-0.65128	0.158416	-4.11121	3.93592e-05	0.000302846
KIF20A	1076.64	-0.650814	0.0618317	-10.5256	6.58584e-26	3.31115e-24
RP11-280K24.4	10.6732	-0.650662	0.175558	-3.70626	0.000210346	0.00136588
NTSR1	24.3959	-0.649953	0.191098	-3.40115	0.00067102	0.00380399
LPAR4	24.8666	-0.649709	0.191169	-3.39861	0.000677297	0.00383214
STAB1	40.9575	-0.648827	0.184808	-3.51081	0.000446746	0.00266648
GNRH2	10.9102	-0.648814	0.177891	-3.64725	0.000265064	0.00167606
RUSC1	718.175	-0.648217	0.0785423	-8.2531	1.54335e-16	4.58108e-15
ZNF217	1096.11	-0.647434	0.0638741	-10.1361	3.82043e-24	1.74462e-22
DOK3	237.831	-0.647401	0.116916	-5.53731	3.0716e-08	4.09768e-07
TAGAP	3237.96	-0.64624	0.0413792	-15.6175	5.53229e-55	8.5391e-53
DUSP9	28.5944	-0.645668	0.189839	-3.40113	0.000671089	0.00380399
LOC102723428	51.1932	-0.644994	0.176541	-3.65351	0.00025868	0.00164242
RFX8	225.675	-0.644062	0.121933	-5.28212	1.27698e-07	1.55812e-06
LOC389641	13.7362	-0.64149	0.183921	-3.48786	0.000486908	0.00287287
ATP2A1	137.977	-0.640858	0.139834	-4.583	4.58346e-06	4.26179e-05
CTRL	55.9827	-0.640271	0.174864	-3.66154	0.000250708	0.00159706
LINC00263	31.4639	-0.63979	0.188883	-3.38722	0.000706036	0.00395991
PPARG	8.43628	-0.639218	0.163443	-3.91095	9.19322e-05	0.000651191
TRNH	142.653	-0.63833	0.14487	-4.40623	1.05185e-05	9.21933e-05
EMR1	32.1668	-0.637333	0.188815	-3.37544	0.000736983	0.00410662
NCS1	49.6119	-0.637163	0.180231	-3.53527	0.000407365	0.00245709
BMP10	25.0135	-0.6368	0.191155	-3.33133	0.000864334	0.00472415
CDKN1B	676.129	-0.636721	0.0723388	-8.80193	1.34482e-18	4.59234e-17
ODF3B	18.1362	-0.635806	0.189645	-3.35262	0.000800509	0.00441438
NLRC5	1075.72	-0.635054	0.0655799	-9.68367	3.53769e-22	1.48785e-20
RN7SK	25.5204	-0.633149	0.191109	-3.31302	0.000922932	0.00499841
PLEKHB1	66.5525	-0.632775	0.167417	-3.77963	0.000157063	0.00105771
IKZF4	122.943	-0.632091	0.144684	-4.36877	1.24946e-05	0.00010744
COL4A1	10.6702	-0.632057	0.177504	-3.5608	0.000369733	0.00226282
ZMAT1	102.56	-0.632057	0.147903	-4.27344	1.92478e-05	0.000157774
EPHX2	1162.22	-0.631718	0.0576721	-10.9536	6.38394e-28	3.50662e-26
HOXB3	270.842	-0.631632	0.104949	-6.01849	1.76051e-09	2.72007e-08
C19orf59	55.7992	-0.631208	0.17529	-3.60093	0.000317077	0.00196778
KIAA0930	684.167	-0.630398	0.0722759	-8.7221	2.7309e-18	9.18331e-17
SATB1	5740.8	-0.629319	0.040418	-15.5703	1.15907e-54	1.75395e-52
PARM1	38.4817	-0.62883	0.185292	-3.39372	0.000689513	0.00389412
MYOM1	15.3561	-0.628792	0.187084	-3.36101	0.000776578	0.0043024
FAM46A	537.874	-0.628308	0.0819094	-7.67077	1.70963e-14	4.35447e-13
CEP19	122.028	-0.627309	0.144731	-4.33432	1.46213e-05	0.000123255
LRP2	91.5783	-0.626436	0.157266	-3.9833	6.79655e-05	0.000497179
EPS8L2	63.7339	-0.62611	0.167993	-3.727	0.00019377	0.0012727
LRRC45	110.96	-0.626049	0.144046	-4.34618	1.38528e-05	0.000117482
CASP8	618.449	-0.626004	0.0767404	-8.15742	3.42252e-16	9.91119e-15
ETV5	450.151	-0.625697	0.0862941	-7.25075	4.14482e-13	9.38054e-12
FADS2	4120.9	-0.625558	0.03839	-16.2948	1.07445e-59	1.88455e-57
GPR146	60.6263	-0.625341	0.17141	-3.64821	0.000264076	0.00167187
AVPR2	53.4603	-0.624346	0.177778	-3.51193	0.000444863	0.00265627
RAD9B	101.47	-0.623687	0.14871	-4.19398	2.74106e-05	0.000217411
ANK2	34.8908	-0.623044	0.18788	-3.31618	0.000912582	0.00495278
FGD4	17.0931	-0.622697	0.187677	-3.31792	0.00090692	0.00492898
LOC100506060	46.4561	-0.622678	0.18108	-3.43869	0.000584535	0.0033757
AFF1	539.165	-0.620854	0.0813898	-7.62815	2.38139e-14	5.94771e-13
PLXNB2	35.3866	-0.62077	0.187604	-3.30894	0.000936497	0.00505944
GABRD	17.5965	-0.620695	0.188461	-3.2935	0.00098949	0.00531782
CASC15	68.495	-0.61991	0.165403	-3.74787	0.00017834	0.00118655
PDZD9	166.021	-0.619465	0.133862	-4.62763	3.69869e-06	3.50671e-05
HMGA2	10.0412	-0.619437	0.1755	-3.52955	0.000416264	0.00250488
LOC339192	246.033	-0.618378	0.121725	-5.08013	3.77181e-07	4.26504e-06
LASP1	3033.28	-0.618283	0.0431471	-14.3296	1.42873e-46	1.68339e-44
ZNF10	8.16605	-0.615929	0.164644	-3.74098	0.000183305	0.00121326
BRICD5	104.133	-0.614343	0.1517	-4.04972	5.12784e-05	0.000383656
ANKRD22	26.9609	-0.614295	0.190639	-3.22229	0.00127169	0.00659118
GRIA2	25.0874	-0.613654	0.191164	-3.21009	0.00132694	0.00684305
KLKB1	11.4243	-0.61354	0.178926	-3.429	0.000605801	0.00347992
SPSB1	461.087	-0.612506	0.08528	-7.1823	6.85503e-13	1.51166e-11
C15orf62	57.9648	-0.612477	0.178296	-3.43518	0.000592164	0.00341174
RBM43	79.679	-0.612294	0.160973	-3.80372	0.000142539	0.000970248
RYR2	9.29947	-0.612162	0.168095	-3.64176	0.000270781	0.00170695
SLC1A4	785.923	-0.610972	0.0689005	-8.86746	7.48336e-19	2.61918e-17
TRIB2	262.247	-0.610954	0.106989	-5.71046	1.1267e-08	1.59109e-07
PARP9	856.383	-0.610589	0.0661302	-9.23313	2.62848e-20	1.00922e-18
VANGL1	1244.33	-0.610396	0.0565177	-10.8001	3.43901e-27	1.83038e-25
PAG1	291.636	-0.610173	0.104393	-5.84497	5.06649e-09	7.41948e-08
MANSC1	36.4338	-0.610047	0.188281	-3.24009	0.0011949	0.00625196
FLJ45964	25.4604	-0.610013	0.19117	-3.19095	0.00141806	0.00725239
LOC153684	55.8884	-0.608044	0.173422	-3.50614	0.000454648	0.00270736
SAP25	95.0575	-0.606984	0.152676	-3.97564	7.01901e-05	0.000512239
COL17A1	27.715	-0.606949	0.190816	-3.18081	0.00146863	0.00748733
TXNIP	903.025	-0.606695	0.0646971	-9.37747	6.75734e-21	2.70206e-19
ANXA1	4895.15	-0.606245	0.0391186	-15.4976	3.60024e-54	5.29235e-52
TMPO-AS1	135.099	-0.605794	0.134524	-4.50325	6.69236e-06	6.07984e-05
HCAR3	10.8762	-0.605625	0.177699	-3.40814	0.000654067	0.00371979
HDAC4	1123.96	-0.605541	0.0633216	-9.56294	1.1446e-21	4.66145e-20
RHOU	260.878	-0.605318	0.10802	-5.60376	2.09749e-08	2.85491e-07
PURB	2515.93	-0.603545	0.0551804	-10.9377	7.61445e-28	4.15297e-26
SLX1A-SULT1A3	21.2819	-0.602537	0.190791	-3.1581	0.00158803	0.00801547
PAX8-AS1	62.1799	-0.602261	0.169124	-3.56107	0.000369351	0.00226227
SEPT5-GP1BB	112.193	-0.60208	0.145106	-4.14923	3.33591e-05	0.000259787
TMC8	2438.46	-0.601277	0.0458028	-13.1275	2.29062e-39	2.07975e-37
ACSS2	186.066	-0.601114	0.124731	-4.81927	1.44087e-06	1.46798e-05
PCDH18	20.9608	-0.601113	0.190469	-3.15597	0.00159965	0.00807146
SIX3	27.0198	-0.600452	0.190765	-3.1476	0.00164617	0.00828185
SLC14A2	18.9758	-0.599764	0.189853	-3.15909	0.00158261	0.00799094
MORN3	65.4545	-0.599494	0.170313	-3.51996	0.00043162	0.0025862
TSC22D3	17.048	-0.599435	0.184338	-3.25183	0.00114665	0.00604048
ARMC4	8.57667	-0.59798	0.165519	-3.61275	0.000302971	0.00188944
GAB2	59.9172	-0.596991	0.170957	-3.49205	0.00047932	0.00283134
FSD1L	327.436	-0.596369	0.0971787	-6.13683	8.41854e-10	1.35073e-08
PCDHB2	29.6244	-0.595106	0.189681	-3.1374	0.00170455	0.00853383
MBD4	804.728	-0.595034	0.0718542	-8.28114	1.22004e-16	3.65656e-15
PLEK	2571.55	-0.593758	0.0458456	-12.9513	2.31151e-38	2.01571e-36
KLHL3	148.519	-0.592931	0.130548	-4.54186	5.57594e-06	5.1168e-05
CCND3	2934.55	-0.592851	0.0433411	-13.6787	1.36045e-42	1.3999e-40
RNASEL	401.051	-0.592055	0.092269	-6.41661	1.39338e-10	2.48346e-09
GNG12	13.4785	-0.591971	0.182514	-3.24342	0.00118103	0.00618567
KCNQ3	59.0993	-0.591063	0.172892	-3.41869	0.000629236	0.00359847
RAG1	42.3667	-0.590849	0.181827	-3.24951	0.00115602	0.00607325
TTLL10	46.3884	-0.590527	0.180736	-3.26734	0.00108563	0.00575434
KIAA0825	88.1246	-0.589659	0.155635	-3.78872	0.000151423	0.0010233
CDCP1	43.7969	-0.589649	0.181759	-3.24412	0.00117814	0.00617476
QPRT	305.035	-0.589261	0.103739	-5.6802	1.34534e-08	1.88433e-07
DAB2IP	12.9452	-0.588677	0.184106	-3.1975	0.00138625	0.00711093
CST7	277.096	-0.588623	0.106652	-5.51907	3.40798e-08	4.51909e-07
MMP14	62.8623	-0.586823	0.169286	-3.46646	0.000527366	0.00307166
ZBTB46	136.295	-0.585788	0.139678	-4.19386	2.74252e-05	0.000217415
LOC101928588	72.0429	-0.585378	0.16422	-3.56461	0.0003644	0.00223603
RP11-265P11.2	33.5838	-0.585124	0.188069	-3.11122	0.00186319	0.00923219
KCNAB1	360.02	4.61025	0.148696	31.0045	4.68429e-211	8.03356e-208
KRT1	222.346	2.69755	0.132497	20.3593	3.84036e-92	1.23491e-89
CCL20	4682.61	2.41606	0.0406559	59.4271	0	0
XCL2	849.739	2.36622	0.0739202	32.0104	7.80812e-225	1.50648e-221
IL36RN	341.642	2.34528	0.107828	21.7502	6.87453e-105	2.79233e-102
XCL1	1932.18	2.15462	0.0527132	40.8744	0	0
COL5A3	3125.99	2.15273	0.0557026	38.6469	0	0
GALNT9	457.233	2.11189	0.0958682	22.0291	1.51715e-107	6.50479e-105
ATP1B4	1118.62	1.97229	0.0637183	30.9532	2.30119e-210	3.55189e-207
SLIT2	87.1462	1.95714	0.165336	11.8373	2.50336e-32	1.69471e-30
IL13	353.835	1.9114	0.102213	18.7002	4.92866e-78	1.10252e-75
GNLY	97.5026	1.89942	0.162552	11.685	1.52085e-31	9.82189e-30
HTR2B	224.023	1.89152	0.120445	15.7044	1.41128e-55	2.26907e-53
AKR1C6P	102.273	1.85512	0.160337	11.5702	5.837e-31	3.69238e-29
SNTB1	341.791	1.84539	0.102396	18.022	1.30978e-72	2.73194e-70
KYNU	85.8111	1.69956	0.163847	10.3729	3.29518e-25	1.61464e-23
CACNA1I	115.703	1.6828	0.149764	11.2364	2.7027e-29	1.5742e-27
IL4I1	591.698	1.60563	0.0798787	20.1009	7.24873e-90	2.15162e-87
GCSAML	644.634	1.60213	0.0788615	20.3158	9.32383e-92	2.93701e-89
MYO7A	1327.93	1.60049	0.0584089	27.4015	2.62964e-165	2.53678e-162
PI16	378.914	1.59419	0.0954897	16.6949	1.42794e-62	2.59297e-60
MAGEL2	247.46	1.59103	0.115582	13.7654	4.11712e-43	4.35259e-41
CCND2	1094.95	1.57991	0.0710343	22.2415	1.36281e-109	6.00997e-107
LSP1	812.564	1.57406	0.0701155	22.4495	1.29506e-111	6.44815e-109
BRD2-3	29.0212	1.56756	0.191133	8.20141	2.37585e-16	6.97497e-15
CD48	1112.6	1.52772	0.0631595	24.1882	2.95792e-129	1.98502e-126
RDH8	166.382	1.52418	0.131117	11.6246	3.09036e-31	1.97924e-29
NLRP3	310.166	1.49886	0.103404	14.4951	1.30063e-47	1.58073e-45
MYL4	41.0418	1.48625	0.186164	7.98356	1.4217e-15	3.94675e-14
AGXT	25.5853	1.47472	0.191047	7.71914	1.17121e-14	3.03316e-13
ST3GAL1	316.794	1.47399	0.106254	13.8723	9.32538e-44	9.92671e-42
FLRT2	25.3138	1.47245	0.191066	7.70654	1.29276e-14	3.32912e-13
IL36G	49.2581	1.46578	0.18167	8.06838	7.12352e-16	2.02863e-14
AHNAK	306.966	1.43868	0.121785	11.8133	3.3318e-32	2.21665e-30
NLRP13	74.7083	1.40238	0.168172	8.33899	7.49289e-17	2.27216e-15
IL1R2	97.0785	1.40136	0.157143	8.9177	4.76066e-19	1.69702e-17
CCL22	977.989	1.35836	0.0715666	18.9803	2.48007e-80	5.79997e-78
OLFM2	275.151	1.35025	0.109698	12.3087	8.12889e-35	6.15046e-33
ART5	42.0051	1.33969	0.185555	7.21991	5.20211e-13	1.15532e-11
DCDC2C	43.2975	1.33651	0.185254	7.21449	5.41377e-13	1.2006e-11
APCDD1L-AS1	57.1468	1.32809	0.17794	7.46372	8.41126e-14	1.99735e-12
TMIGD2	39.164	1.30749	0.187705	6.96568	3.2683e-12	6.74414e-11
CCL3L1	315.426	1.30464	0.103192	12.6428	1.22649e-36	1.00164e-34
CCBE1	311.437	1.29149	0.101243	12.7564	2.87192e-37	2.38323e-35
LIF	1882.25	1.28864	0.0544389	23.6713	7.12514e-124	4.39906e-121
LINC00977	177.668	1.27585	0.125731	10.1475	3.40112e-24	1.56554e-22
LAYN	192.587	1.27514	0.125595	10.1528	3.21944e-24	1.48779e-22
SNX29	760.778	1.26704	0.0832412	15.2212	2.55611e-52	3.65311e-50
ITPR1	3185.23	1.25929	0.0561957	22.4091	3.2098e-111	1.54823e-108
IL36B	62.9371	1.24852	0.172228	7.24922	4.19184e-13	9.47307e-12
IL22	72.1741	1.24335	0.167694	7.41437	1.22202e-13	2.87967e-12
ZP4	89.7072	1.21379	0.158514	7.65729	1.89904e-14	4.7895e-13
MICAL2	1110.87	1.21304	0.061892	19.5994	1.56526e-85	4.09487e-83
FRMD1	834.141	1.21204	0.0722497	16.7758	3.67176e-63	6.82815e-61
RNU6-1	13.5117	1.19487	0.179444	6.65873	2.76203e-11	5.26319e-10
TBL1Y	534.261	1.19049	0.0821056	14.4995	1.2209e-47	1.49561e-45
CSF2	26224.2	1.18343	0.0332439	35.5985	1.47768e-277	4.5616e-274
MGLL	6924.08	1.17332	0.0358506	32.7279	6.26369e-235	1.38114e-231
IL1R1	2559.14	1.16984	0.0488224	23.9611	7.07465e-127	4.54988e-124
MAT1A	55.2737	1.16582	0.176236	6.61511	3.71287e-11	6.99733e-10
FERMT2	339.514	1.15519	0.0982454	11.7582	6.40537e-32	4.18928e-30
NINJ1	38274.1	1.15347	0.0343834	33.5474	9.83395e-247	2.52978e-243
RETN	85.8639	1.15027	0.161272	7.13248	9.85762e-13	2.14299e-11
PPAP2B	22.3332	1.14371	0.190546	6.00228	1.94571e-09	2.98826e-08
RASSF2	1459.32	1.13231	0.0598418	18.9217	7.5633e-80	1.74238e-77
PLG	61.0527	1.13158	0.172756	6.55015	5.74802e-11	1.06125e-09
IL23A	5696.76	1.12975	0.0396091	28.5225	6.15926e-179	6.79058e-176
PLCH1	126.601	1.12939	0.142698	7.91452	2.48202e-15	6.75662e-14
RAPH1	1642.96	1.127	0.0562444	20.0375	2.59694e-89	7.42292e-87
SLC22A20	47.1942	1.12121	0.181893	6.16408	7.08937e-10	1.15184e-08
SHC2	80.7972	1.11428	0.174669	6.37935	1.77838e-10	3.14066e-09
MMP13	294.194	1.10039	0.106652	10.3176	5.86929e-25	2.81343e-23
NETO1	667.922	1.09684	0.0743348	14.7554	2.84009e-49	3.65307e-47
DNAH17	994.543	1.09523	0.064949	16.8629	8.43535e-64	1.6481e-61
CD200	173.732	1.09092	0.125395	8.69992	3.32128e-18	1.10961e-16
LINC00282	62.0865	1.07165	0.174189	6.15223	7.64009e-10	1.23741e-08
C10orf128	26.5473	1.06553	0.191014	5.57831	2.42873e-08	3.28261e-07
PTPRF	590.707	1.05394	0.0793573	13.281	2.98422e-40	2.79161e-38
APOL1	248.355	1.04552	0.110898	9.4278	4.18773e-21	1.68766e-19
LOC101928629	220.697	1.0442	0.115473	9.04279	1.52721e-19	5.62587e-18
ENTHD1	164.891	1.0421	0.135239	7.70562	1.30206e-14	3.34399e-13
FSD1	165.049	1.04148	0.130826	7.96076	1.7098e-15	4.71264e-14
NLRP4	19.7995	1.03629	0.190067	5.45222	4.97442e-08	6.41439e-07
SLC6A19	15.9456	1.03132	0.18609	5.54207	2.9892e-08	3.99811e-07
TTC40	2116.59	1.03005	0.0619849	16.6178	5.17901e-62	9.29513e-60
KIF25-AS1	931.255	1.02811	0.0664676	15.4679	5.71729e-54	8.32513e-52
S1PR2	457.07	1.02744	0.0891038	11.5308	9.22888e-31	5.76711e-29
PIM1	2494.97	1.0244	0.0510453	20.0685	1.39108e-89	4.05118e-87
LPHN3	40.4561	1.02033	0.186404	5.47377	4.40566e-08	5.7144e-07
LCN6	86.9908	1.01821	0.163545	6.22588	4.78867e-10	7.94765e-09
NEDD4L	1209.02	1.01297	0.062943	16.0934	2.83662e-58	4.81134e-56
IL31	24.7164	1.01256	0.19104	5.30024	1.15651e-07	1.42124e-06
BATF	402.458	1.00892	0.0901933	11.1862	4.7659e-29	2.72451e-27
DACT3	151.865	1.00869	0.132115	7.63493	2.25952e-14	5.66163e-13
RUNX3	9175.08	1.00651	0.0334848	30.0589	1.67274e-198	1.98606e-195
C19orf77	1593.64	1.00208	0.0521304	19.2226	2.39381e-82	5.86484e-80
BCL11A	214.094	0.995439	0.116239	8.56369	1.09308e-17	3.56695e-16
MID1	220.169	0.992398	0.115541	8.58914	8.76241e-18	2.90231e-16
RASGEF1C	265.384	0.991873	0.107107	9.26054	2.03395e-20	7.86819e-19
MCAM	526.484	0.978752	0.0810598	12.0745	1.44122e-33	1.04438e-31
EPS8	40.6062	0.977206	0.185247	5.27514	1.32652e-07	1.61102e-06
NFATC4	222.698	0.976487	0.119068	8.20109	2.38217e-16	6.977e-15
RNF223	120.982	0.970164	0.144612	6.70873	1.96322e-11	3.79729e-10
CPEB2	885.48	0.96179	0.0651398	14.765	2.4629e-49	3.2216e-47
TLE1	233.223	0.961121	0.112158	8.56938	1.04044e-17	3.40237e-16
SLC12A7	223.761	0.960213	0.116253	8.25969	1.46051e-16	4.35193e-15
CLIP2	2049.8	0.957215	0.0497749	19.2309	2.04172e-82	5.0829e-80
CDH4	433.863	0.947706	0.0872971	10.8561	1.86556e-27	1.00681e-25
REG4	154.557	0.941733	0.129746	7.25828	3.92032e-13	8.89855e-12
IGF2-AS	804.909	0.934672	0.0756129	12.3613	4.23376e-35	3.23505e-33
F5	1028.12	0.931998	0.0661459	14.09	4.37355e-45	4.82184e-43
LOC101927775	45.1309	0.931936	0.181716	5.12853	2.92008e-07	3.36857e-06
FAM49A	90.3709	0.924463	0.160379	5.76424	8.20288e-09	1.17669e-07
PER3	175.43	0.921404	0.127608	7.22058	5.17657e-13	1.1513e-11
LOC101927216	22.9645	0.91939	0.191021	4.81302	1.48663e-06	1.51161e-05
NRARP	577.677	0.909339	0.079762	11.4007	4.14974e-30	2.502e-28
LY9	127.636	0.908302	0.15282	5.94361	2.78809e-09	4.20666e-08
CAMSAP3	337.94	0.907722	0.101262	8.96407	3.12908e-19	1.13641e-17
TRIML2	52.1359	0.907644	0.179822	5.04747	4.47698e-07	5.00016e-06
MAPKAPK2	5491.06	0.903826	0.0369736	24.4452	5.66048e-132	4.16045e-129
RNF144A-AS1	37.527	0.90327	0.186319	4.84797	1.24734e-06	1.28266e-05
MUC5AC	59.8215	0.899493	0.172273	5.22133	1.77644e-07	2.12883e-06
TNFRSF9	620.938	0.899184	0.0759059	11.846	2.25622e-32	1.53413e-30
TRPM6	104.933	0.898928	0.148185	6.06627	1.30918e-09	2.05776e-08
LCN10	153.23	0.898814	0.149955	5.99391	2.04851e-09	3.14302e-08
LAMA5	177.857	0.897152	0.126128	7.11303	1.13524e-12	2.45412e-11
CHRNA6	96.0313	0.893454	0.152495	5.85892	4.65877e-09	6.86802e-08
PLXNA4	26.6459	0.888004	0.190784	4.65451	3.24757e-06	3.1173e-05
RCAN3	615.844	0.887052	0.0748117	11.8571	1.97636e-32	1.34978e-30
ARPP21	1078.25	0.886944	0.0618559	14.3389	1.25064e-46	1.4849e-44
AC079586.1	25.5017	0.881649	0.191159	4.61212	3.98584e-06	3.7536e-05
ARHGAP29	25.1099	0.879669	0.191168	4.60154	4.19375e-06	3.94457e-05
ENOX1	95.2613	0.875285	0.151799	5.76608	8.11369e-09	1.16497e-07
FAM107B	5468.59	0.874515	0.0419143	20.8643	1.12956e-96	4.05458e-94
SLC28A3	36.4474	0.871345	0.187659	4.64323	3.43001e-06	3.27815e-05
SLC12A7-2	358.068	0.870622	0.094873	9.17671	4.44455e-20	1.68554e-18
TECTA	31.9424	0.869238	0.189196	4.59437	4.34052e-06	4.0579e-05
NCF2	32.8131	0.868723	0.189263	4.59004	4.43152e-06	4.13046e-05
CRISPLD1	42.2141	0.86173	0.183083	4.70677	2.51671e-06	2.46637e-05
LRIG1	317.948	0.85742	0.101001	8.48923	2.08015e-17	6.57934e-16
STX1B	53.1918	0.856266	0.177766	4.8168	1.45875e-06	1.48424e-05
RASSF4	259.907	0.855894	0.112767	7.58992	3.2011e-14	7.90544e-13
RHOV	225.646	0.85403	0.11397	7.49344	6.70918e-14	1.61302e-12
MTX3	281.497	0.851213	0.105094	8.09951	5.51812e-16	1.58607e-14
SRGN	4869.24	0.847542	0.0393822	21.5209	9.92003e-103	3.82789e-100
KIAA1199	392.03	0.847502	0.0917517	9.2369	2.53732e-20	9.76646e-19
ARNT2	713.739	0.847076	0.0717683	11.8029	3.7693e-32	2.48629e-30
GPR132	42.8129	0.846577	0.184329	4.59276	4.3743e-06	4.08453e-05
NPPC	144.034	0.840664	0.132221	6.35804	2.04346e-10	3.55992e-09
C2CD4C	613.048	0.837723	0.0753777	11.1137	1.07652e-28	6.04219e-27
ZBTB32	149.408	0.832858	0.133772	6.22594	4.78672e-10	7.94765e-09
SLC19A2	1662.31	0.83283	0.0559213	14.8929	3.66571e-50	4.96317e-48
PTGS2	694.264	0.831288	0.0737574	11.2706	1.83387e-29	1.07627e-27
ATF3	295.152	0.828113	0.10301	8.03914	9.04712e-16	2.55288e-14
CYP4F11	925.316	0.826672	0.0705248	11.7217	9.86601e-32	6.40383e-30
HLA-DRB5	40.9254	0.824962	0.184647	4.46779	7.90326e-06	7.08813e-05
AMIGO2	203.545	0.823886	0.120992	6.80942	9.79917e-12	1.9491e-10
MYO18B	1410.87	0.823401	0.0582565	14.1341	2.3424e-45	2.61992e-43
CGA	35.5051	0.821277	0.188177	4.36439	1.2748e-05	0.000109254
KCNJ15	62.1284	0.821193	0.174435	4.70773	2.50491e-06	2.45793e-05
PAPOLA	5551.13	0.81801	0.0408615	20.0191	3.75461e-89	1.05368e-86
UNC13A	42.4823	0.807881	0.184186	4.38623	1.15334e-05	9.98978e-05
IGF2	82.4114	0.807592	0.164695	4.90357	9.41112e-07	9.90189e-06
RASAL1	78.7994	0.803616	0.164345	4.88981	1.00933e-06	1.05621e-05
RORB	115.598	0.795843	0.14789	5.38133	7.39372e-08	9.31608e-07
MATN1	84.9599	0.793208	0.161083	4.92423	8.46924e-07	8.97821e-06
SLC2A4	29.4981	0.792054	0.189688	4.17556	2.97249e-05	0.000233726
SORD	746.115	0.791269	0.0709818	11.1475	7.36549e-29	4.16434e-27
CAMKV	174.739	0.790367	0.131444	6.01295	1.82181e-09	2.80355e-08
MAGEB6	158.39	0.79023	0.129474	6.10341	1.03829e-09	1.64876e-08
SLC22A1	6257.03	0.78964	0.0353454	22.3407	1.48849e-110	6.96207e-108
HMCN2	760.777	0.789398	0.0717631	11	3.81936e-28	2.11297e-26
GABRB2	138.277	0.789294	0.143561	5.49799	3.8415e-08	5.02062e-07
CCR7	218.069	0.787904	0.114347	6.89044	5.56188e-12	1.12366e-10
PLCB2	315.374	0.779696	0.0988767	7.88554	3.13181e-15	8.4799e-14
CYP4F12	245.2	0.776863	0.122559	6.33869	2.31726e-10	4.00974e-09
TMEM243	656.819	0.775412	0.0750272	10.3351	4.89035e-25	2.35883e-23
KIAA1549L	38.257	0.77292	0.185865	4.15849	3.20356e-05	0.000250872
CCL4L2	17.6516	0.772702	0.189271	4.08251	4.45526e-05	0.000339422
EHD4	1497.15	0.772476	0.053591	14.4143	4.20862e-47	5.075e-45
ZFHX2	309.224	0.771705	0.106861	7.2216	5.13813e-13	1.1444e-11
PDE8A	1248.61	0.76959	0.0572634	13.4395	3.54987e-41	3.53498e-39
REEP1	30.4108	0.76875	0.189449	4.05783	4.95307e-05	0.000371842
HOXC13	72.2059	0.766108	0.164474	4.65794	3.19387e-06	3.0734e-05
SLAMF7	625.558	0.766083	0.0757057	10.1192	4.54021e-24	2.06112e-22
FOXO1	380.657	0.764059	0.0924637	8.26334	1.41649e-16	4.22892e-15
LOC101927400	23.487	0.762901	0.191145	3.99122	6.57354e-05	0.000482008
GALNT14	17.4653	0.760598	0.189036	4.02357	5.73234e-05	0.000426403
LOC100505797	81.8694	0.760581	0.159523	4.76783	1.86217e-06	1.85556e-05
SPATA19	28.6325	0.760495	0.190196	3.99848	6.37516e-05	0.000469021
TMEM132D	327.332	0.759877	0.101752	7.46791	8.14763e-14	1.93773e-12
GABRB3	221.213	0.759286	0.122676	6.18937	6.04047e-10	9.91859e-09
SHISA7	95.8338	0.758489	0.151428	5.00892	5.47363e-07	6.0132e-06
FOSL2	4963.36	0.758344	0.0367518	20.6342	1.35341e-94	4.6422e-92
ATP1B1	701.5	0.757072	0.0767255	9.86727	5.77155e-23	2.49535e-21
PLK3	3519.43	0.754963	0.0396828	19.025	1.05942e-80	2.55501e-78
INHBA	322.78	0.754541	0.0968757	7.78876	6.76723e-15	1.7764e-13
SUGCT	40.5305	0.750316	0.183778	4.08274	4.4508e-05	0.00033925
PAX2	58.8911	0.747473	0.171803	4.35076	1.35664e-05	0.000115243
SIRPB1	418.7	0.747412	0.0884073	8.45418	2.81049e-17	8.78135e-16
SLAMF1	4810.32	0.741794	0.0377966	19.6259	9.28614e-86	2.47123e-83
TUBB2A	4775.21	0.738149	0.0388812	18.9847	2.28187e-80	5.41857e-78
CLEC4A	18.7856	0.737931	0.188576	3.91318	9.10881e-05	0.000646709
LPAR6	2428.09	0.735007	0.0585036	12.5635	3.35333e-36	2.6818e-34
OTOF	73.0167	0.734949	0.167552	4.38639	1.15246e-05	9.98774e-05
INPP5A	219.757	0.733501	0.114177	6.42423	1.32539e-10	2.36502e-09
CLCF1	122.508	0.732707	0.144388	5.07458	3.88353e-07	4.38175e-06
RAB3B	552.335	0.730926	0.0852818	8.57072	1.0284e-17	3.37013e-16
NIPA1	3743.88	0.729322	0.0463775	15.7258	1.00714e-55	1.63633e-53
IL26	29.3388	0.729174	0.190026	3.83723	0.000124432	0.000857667
FAM69B	232.828	0.728357	0.111302	6.54397	5.99069e-11	1.10474e-09
F2RL1	175.401	0.727443	0.125656	5.78917	7.07336e-09	1.0213e-07
SDK1	23.0413	0.722255	0.190935	3.78272	0.000155122	0.00104646
RHOG	6525.71	0.720918	0.0355146	20.2992	1.30613e-91	4.03202e-89
NPDC1	7132.24	0.716891	0.121113	5.91921	3.23484e-09	4.83347e-08
RORC	202.075	0.716824	0.119818	5.98261	2.19596e-09	3.35591e-08
FLNB	5893.31	0.715225	0.0520063	13.7527	4.90858e-43	5.15401e-41
DTX1	267.406	0.71364	0.1054	6.77076	1.2811e-11	2.51895e-10
TMEM255A	16.775	0.71293	0.187347	3.8054	0.000141577	0.000965392
TMTC1	83.7458	0.7127	0.15711	4.53632	5.72453e-06	5.24381e-05
AGRN	1741.21	0.712619	0.0542477	13.1364	2.03737e-39	1.86075e-37
EFNA3	132.075	0.710902	0.139458	5.09761	3.43964e-07	3.90373e-06
RAC3	340.506	0.710191	0.100354	7.07684	1.4748e-12	3.15958e-11
FGFRL1	640.323	0.708207	0.0763055	9.28121	1.67571e-20	6.49862e-19
ZBTB10	710.363	0.706637	0.0761326	9.28166	1.66854e-20	6.48713e-19
PCOLCE2	255.595	0.698542	0.107059	6.52482	6.80833e-11	1.25103e-09
ZNF267	2533.14	0.695638	0.0506492	13.7344	6.31461e-43	6.58554e-41
SUSD4	225.701	0.690377	0.11146	6.19393	5.8684e-10	9.64631e-09
TTLL7	119.009	0.689517	0.140622	4.90334	9.42188e-07	9.90645e-06
PLAU	7228.57	0.689311	0.0384679	17.9191	8.36191e-72	1.72088e-69
TMEM71	412.965	0.685602	0.0878167	7.8072	5.84715e-15	1.54275e-13
LOC100506990	350.117	0.682423	0.0955435	7.14254	9.16215e-13	1.99743e-11
MIR483	40.438	0.680356	0.183802	3.70158	0.000214263	0.00138839
SYTL3	134.502	0.678616	0.13778	4.92537	8.41993e-07	8.94437e-06
HDC	231.801	0.678103	0.111397	6.08725	1.14865e-09	1.81468e-08
CXorf57	1141.03	0.677801	0.0602944	11.2415	2.54909e-29	1.49035e-27
RPL6	11795.5	0.677551	0.0339162	19.9772	8.70077e-89	2.39815e-86
GLI3	366.996	0.676539	0.100883	6.70621	1.99746e-11	3.84919e-10
BIN1	218.01	0.674573	0.116421	5.79427	6.86173e-09	9.92603e-08
DNAH17-AS1	47.2966	0.672216	0.18286	3.67613	0.000236799	0.00152165
ADCYAP1	42.0111	0.671193	0.183248	3.66275	0.000249524	0.00159083
GLIPR1	3773.53	0.668779	0.0397328	16.8319	1.424e-63	2.71352e-61
ARG2	1167.57	0.66451	0.0582619	11.4056	3.92182e-30	2.37385e-28
FAM84B	405.25	0.662969	0.0913061	7.26095	3.84383e-13	8.73778e-12
RARG	630.391	0.662839	0.0736541	8.99935	2.27066e-19	8.28549e-18
PLS3	1194.31	0.660671	0.0620857	10.6413	1.91471e-26	9.81844e-25
IRAK2	290.363	0.660017	0.102549	6.43613	1.22555e-10	2.19193e-09
THBS1	17.5747	0.658843	0.189087	3.48433	0.000493365	0.0029032
NID1	77.5203	0.657925	0.162257	4.05483	5.01707e-05	0.000376098
ALDH2	96.1361	0.656757	0.156988	4.18347	2.8709e-05	0.000226315
CBFA2T3	655.199	0.656232	0.0737976	8.89232	5.98452e-19	2.1186e-17
ZNF521	30.9023	0.655233	0.188873	3.46918	0.000522052	0.0030453
PTGIR	66.8398	0.653993	0.169256	3.86392	0.000111581	0.000776141
TNKS1BP1	1452.36	0.653014	0.0545878	11.9626	5.57647e-33	3.94829e-31
CAMSAP2	576.825	0.652104	0.0773483	8.43074	3.43473e-17	1.06885e-15
DDHD1	1316.65	0.65199	0.0552579	11.799	3.94763e-32	2.59283e-30
GPC1	1437.91	0.651572	0.0571085	11.4094	3.75464e-30	2.28161e-28
BRSK1	566.655	0.650625	0.078495	8.28874	1.14452e-16	3.43691e-15
LOC100288175	223.936	0.65029	0.114667	5.67114	1.41852e-08	1.97785e-07
SELP	71.2409	0.649763	0.164975	3.93856	8.19734e-05	0.000586311
IL1RL2	42.0485	0.648498	0.182201	3.55924	0.000371935	0.00227449
HECTD2	1359.47	0.646828	0.0573284	11.2828	1.59501e-29	9.39653e-28
LRP1B	10.5513	0.64658	0.177275	3.64732	0.000264987	0.00167606
PRR5	291.999	0.645482	0.102965	6.26893	3.63549e-10	6.19357e-09
STC1	30.8995	0.644394	0.189511	3.4003	0.000673113	0.00381126
AGPAT4	659.835	0.643567	0.0733368	8.77551	1.70134e-18	5.79696e-17
TMEM178B	44.781	0.641568	0.180995	3.54467	0.000393106	0.00238506
KCNMB4	117.327	0.641133	0.142491	4.49947	6.8122e-06	6.18144e-05
SLC12A8	64.8742	0.640268	0.16878	3.79351	0.000148534	0.00100642
LOC388210	23.4417	0.639916	0.191153	3.34766	0.000814968	0.00448528
JUN	1669.89	0.639056	0.052519	12.1681	4.5966e-34	3.3785e-32
MAFA	69.6672	0.638301	0.170396	3.74597	0.000179695	0.00119345
C15orf27	22.1075	0.63816	0.190913	3.34266	0.000829782	0.00455861
PLCL2	708.02	0.63737	0.06971	9.14317	6.06482e-20	2.28876e-18
SPTBN5	164.028	0.637358	0.131388	4.85096	1.22865e-06	1.26428e-05
GALNT3	184.878	0.636266	0.124782	5.09901	3.41427e-07	3.88065e-06
AFF2	477.592	0.635945	0.0898712	7.07618	1.48177e-12	3.16775e-11
FOXA1	628.257	0.63562	0.0743131	8.55328	1.19643e-17	3.87961e-16
DACT2	156.389	0.631943	0.129639	4.87462	1.09016e-06	1.129e-05
BAMBI	123.26	0.629972	0.140065	4.49771	6.8688e-06	6.22583e-05
LINC00987	119.594	0.629545	0.141642	4.44461	8.80514e-06	7.84168e-05
MXI1	264.464	0.627997	0.105462	5.95472	2.60518e-09	3.94612e-08
MAST4	2611.6	0.626357	0.0963336	6.50196	7.92801e-11	1.44815e-09
C1orf54	57.7076	0.625235	0.172168	3.63154	0.000281737	0.00176988
CORO2A	90.3459	0.621197	0.155084	4.00555	6.18727e-05	0.000456722
NOTUM	22.2083	0.621146	0.191157	3.24941	0.00115644	0.0060734
LRIG3	188.155	0.619955	0.119237	5.19933	2.00005e-07	2.37285e-06
SPTLC3	81.7931	0.619835	0.157485	3.93582	8.29122e-05	0.000592477
CYP4F2	188.14	0.618164	0.124383	4.96984	6.70067e-07	7.25522e-06
TENM4	23.4956	0.617641	0.191158	3.23105	0.00123334	0.00642263
SH3BP5	643.877	0.617453	0.0728742	8.47287	2.39424e-17	7.51361e-16
ACRC	665.503	0.615574	0.0735541	8.369	5.81094e-17	1.77257e-15
NUDT11	299.645	0.615522	0.110953	5.5476	2.89619e-08	3.88044e-07
VWCE	143.65	0.615469	0.139686	4.40608	1.05257e-05	9.2204e-05
INA	29.2829	0.615207	0.18997	3.23843	0.00120188	0.00628421
CMAHP	630.841	0.614507	0.0768201	7.9993	1.2513e-15	3.47995e-14
KIF1A	26.1027	0.61443	0.191008	3.21677	0.00129643	0.00670366
LOC101928793	44.7321	0.614255	0.182608	3.36379	0.0007688	0.0042639
MAP3K8	920.369	0.613034	0.0637801	9.61168	7.13744e-22	2.95352e-20
UST	117.645	0.611094	0.141526	4.31788	1.57536e-05	0.000131475
CAPN6	7.58135	0.610118	0.164439	3.7103	0.000207015	0.00134538
PDZD4	390.364	0.609325	0.0914664	6.66174	2.70611e-11	5.16941e-10
IL31RA	91.6074	0.609088	0.157436	3.8688	0.000109371	0.000761795
HK2	1861.66	0.607379	0.0513185	11.8355	2.5583e-32	1.72434e-30
MAP3K4	2941.11	0.607272	0.0427851	14.1935	1.00451e-45	1.14004e-43
LZTS3	339.244	0.606187	0.0967022	6.2686	3.64318e-10	6.19984e-09
SLC38A3	34.8356	0.605624	0.187376	3.23213	0.0012287	0.00640287
PCBP3	90.6806	0.604711	0.155891	3.87905	0.000104865	0.000733058
ARMCX6	622.359	0.603401	0.0744428	8.10556	5.25014e-16	1.51186e-14
GADD45A	3769.24	0.603005	0.0460478	13.0952	3.50759e-39	3.11147e-37
TSPAN15	287.73	0.60158	0.103655	5.80367	6.48807e-09	9.41451e-08
MYO16	21.8939	0.601579	0.191133	3.14744	0.00164706	0.0082836
BCL2A1	5540.29	0.601411	0.0397482	15.1305	1.01884e-51	1.42961e-49
CHAC1	594.702	0.600542	0.0769924	7.80002	6.18962e-15	1.63032e-13
PARD3	1072.51	0.60012	0.0608846	9.85668	6.41366e-23	2.74986e-21
EBI3	11.8293	0.60009	0.17989	3.33588	0.000850307	0.00466034
C11orf96	3418.05	0.59839	0.0540533	11.0704	1.74658e-28	9.6973e-27
VEGFA	1162.58	0.597382	0.0594058	10.056	8.64741e-24	3.86878e-22
SYNGAP1-2	19.2721	0.59489	0.189702	3.13592	0.00171315	0.00856854
FAT2	25.9358	0.594811	0.190849	3.11666	0.0018291	0.00908662
ATP10A	228.381	0.593478	0.110439	5.37383	7.70818e-08	9.67283e-07
NUS1	2470.29	0.593376	0.0501702	11.8273	2.82169e-32	1.8854e-30
GPR87	154.931	0.593287	0.128091	4.63175	3.62595e-06	3.45472e-05
TMEM64	698.215	0.593192	0.0777165	7.63278	2.29751e-14	5.74749e-13
PCDH9	431.646	0.5918	0.0900685	6.57056	5.01273e-11	9.33311e-10
KLHL5	850.892	0.591689	0.0671498	8.81148	1.23507e-18	4.24574e-17
GLT1D1	24.9025	0.591323	0.190889	3.09773	0.00195012	0.00956164
ESR2	52.923	0.590127	0.175949	3.35397	0.000796599	0.00439911
STRIP2	1225.88	0.58828	0.0630348	9.33264	1.0327e-20	4.09761e-19
SLC7A5P2	119.224	0.588244	0.140944	4.1736	2.9983e-05	0.000235515

## Sheet: TFII-I shRNA DEG
Gene ID	Mean normalized counts	FC log2	log2 FC standard error	Wald statistic	p-value	Adjusted p-value
KRT9	86.5736	-3.52387	0.237902	-14.8123	1.22049e-49	3.79541e-48
RGS3	649.55	-2.71427	0.0914096	-29.6935	9.32734e-194	2.05391e-191
CCL1	363.047	-2.67941	0.11323	-23.6634	8.59218e-124	9.03287e-122
CD1C	578.314	-2.5763	0.0911779	-28.2558	1.20768e-175	2.21114e-173
GBP5	306.095	-2.53549	0.120411	-21.0569	1.97536e-98	1.5112e-96
PGLYRP4	21.9945	-2.51911	0.307498	-8.19228	2.56318e-16	2.37717e-15
IFIT3	55.4425	-2.48505	0.240431	-10.3358	4.85319e-25	7.03583e-24
CXCL10	61.9429	-2.4783	0.232887	-10.6416	1.90756e-26	2.90774e-25
BTLA	30.2014	-2.47455	0.298059	-8.30222	1.02186e-16	9.68655e-16
UBXN10	188.894	-2.41436	0.153106	-15.7692	5.07123e-56	1.86536e-54
PI16	184.988	-2.37634	0.1495	-15.8953	6.82975e-57	2.57022e-55
KRT17	24.6836	-2.2729	0.304089	-7.47444	7.75319e-14	6.10625e-13
TRAT1	33.9209	-2.23001	0.280068	-7.96239	1.68746e-15	1.48956e-14
GBP1	500.282	-2.21465	0.0941275	-23.5282	2.10127e-122	2.1671e-120
CD1A	464.643	-2.17301	0.0959675	-22.6432	1.62899e-113	1.46654e-111
CD48	342.906	-2.17248	0.110712	-19.6229	9.86293e-86	5.86557e-84
DCPS	400.289	-2.13824	0.0997947	-21.4264	7.587e-102	5.94375e-100
PTPN3	152.826	-2.1372	0.161407	-13.2411	5.08156e-40	1.22491e-38
DDX25	93.1393	-2.0903	0.194443	-10.7502	5.912e-27	9.20115e-26
RGS16	383.53	-2.08467	0.102848	-20.2695	2.39265e-91	1.59788e-89
STAT1	4107.37	-2.05584	0.0367614	-55.9239	0	0
IFNG	155.989	-2.05107	0.154981	-13.2343	5.56101e-40	1.33456e-38
XAF1	715.895	-2.03256	0.0795914	-25.5374	7.58299e-144	9.88518e-142
ATP9A	953.936	-1.98204	0.0681661	-29.0767	7.08306e-186	1.47972e-183
GPR174	354.25	-1.96003	0.10485	-18.6937	5.56877e-78	2.99482e-76
DPF3	238.815	-1.95487	0.126907	-15.404	1.5382e-53	5.32163e-52
CD1D	371.82	-1.9522	0.102388	-19.0668	4.76813e-81	2.66085e-79
CHRNA3	345.437	-1.94818	0.106207	-18.3432	3.74139e-75	1.96665e-73
WT1	65.4932	-1.94643	0.219863	-8.85291	8.52636e-19	9.01604e-18
NBN	1472.85	-1.92475	0.0562929	-34.1918	3.20549e-256	1.33932e-253
LEF1	4717.63	-1.86654	0.0374255	-49.8736	0	0
RXRA	551.223	-1.8575	0.0906456	-20.4919	2.54317e-93	1.78625e-91
ICOS	54.8028	-1.81505	0.226907	-7.99907	1.25366e-15	1.11448e-14
WNT10A	50.3349	-1.80057	0.238562	-7.54761	4.4333e-14	3.5569e-13
LOC374443	57.8951	-1.77605	0.222587	-7.97911	1.47394e-15	1.30532e-14
CXXC4	18.6482	-1.76268	0.307703	-5.72851	1.01315e-08	5.29144e-08
SLC16A6	32.0398	-1.76014	0.269299	-6.536	6.31876e-11	3.97085e-10
ZBTB7B	168.535	-1.74556	0.149447	-11.6802	1.60945e-31	2.95337e-30
ACTG2	356.218	-1.72583	0.10463	-16.4946	4.00879e-61	1.61691e-59
BBS2	271.421	-1.72209	0.117969	-14.5978	2.90073e-48	8.6412e-47
ANXA1	2502.42	-1.69888	0.042377	-40.0898	0	0
AURKA	1231.07	-1.65698	0.0575926	-28.7706	5.00275e-182	9.94145e-180
LOC101928054	15.077	-1.65654	0.314948	-5.25973	1.44266e-07	6.69368e-07
SH3TC1	381	-1.64459	0.0980575	-16.7717	3.93356e-63	1.65199e-61
EDARADD	913.286	-1.64421	0.0647165	-25.4064	2.14344e-142	2.72869e-140
IFIT2	30.3729	-1.63312	0.272366	-5.99605	2.02181e-09	1.12174e-08
MOB3A	630.529	-1.62753	0.0839438	-19.3883	9.68496e-84	5.59633e-82
TAL1	2051.42	-1.61332	0.0457603	-35.2559	2.79094e-272	1.37813e-269
MARVELD3	30.4611	-1.60729	0.27142	-5.92178	3.18477e-09	1.73681e-08
CD1E	72.2194	-1.606	0.200836	-7.99654	1.27967e-15	1.13698e-14
GPR65	322.498	-1.59976	0.104903	-15.2499	1.64976e-52	5.55431e-51
SLA2	603.551	-1.57656	0.0833942	-18.9049	1.03885e-79	5.69966e-78
COX18	214.746	-1.5674	0.127372	-12.3057	8.44495e-35	1.72661e-33
ITGB2-AS1	255.891	-1.55864	0.122485	-12.7252	4.28313e-37	9.57388e-36
CFL2	112.104	-1.55803	0.181367	-8.59047	8.66126e-18	8.69595e-17
TPM4	10286.1	-1.55291	0.0245303	-63.3059	0	0
IKBKE	352.726	-1.5504	0.104724	-14.8046	1.36858e-49	4.24782e-48
IPCEF1	10.8132	-1.54305	0.322968	-4.77771	1.773e-06	7.21735e-06
SLC4A5	358.919	-1.53948	0.101855	-15.1144	1.30207e-51	4.21814e-50
NOLC1	5743.49	-1.53652	0.0303299	-50.6603	0	0
CD1B	62.1654	-1.53153	0.217196	-7.05138	1.77148e-12	1.25998e-11
GZMA	173.361	-1.52174	0.139326	-10.9221	9.03437e-28	1.44897e-26
TNFSF10	983.552	-1.51145	0.0617437	-24.4795	2.44266e-132	2.78344e-130
RUNX2	103.171	-1.4944	0.180752	-8.26768	1.36592e-16	1.2836e-15
TNFRSF4	1334.51	-1.48964	0.0569105	-26.1751	5.10244e-151	6.98692e-149
MORF4L1	2168.75	-1.48541	0.0444739	-33.3996	1.38791e-244	5.02576e-242
SIT1	894.237	-1.48064	0.0669255	-22.1237	1.8697e-108	1.612e-106
NLRC5	521.451	-1.47524	0.0953206	-15.4766	4.9907e-54	1.75645e-52
GATA3	2601.18	-1.46871	0.0446226	-32.914	1.38529e-237	4.90724e-235
LOC100506634	35.6405	-1.45056	0.256732	-5.65008	1.60371e-08	8.2074e-08
SLAMF8	7.46188	-1.44233	0.320218	-4.50421	6.66214e-06	2.53319e-05
LINC00977	22.4603	-1.44007	0.289163	-4.98015	6.35356e-07	2.73492e-06
RORC	45.9156	-1.43145	0.248509	-5.76013	8.40488e-09	4.42941e-08
CD200	43.3484	-1.43118	0.243363	-5.88084	4.082e-09	2.20471e-08
BAIAP3	82.6041	-1.4299	0.189223	-7.55666	4.13564e-14	3.32627e-13
PLAC8	33.7782	-1.42675	0.258703	-5.51501	3.48765e-08	1.72897e-07
GSE1	3167.17	-1.41284	0.0369021	-38.2863	0	0
CPNE1	1917.48	-1.40882	0.045774	-30.7776	5.22279e-208	1.39517e-205
SIX6	456.685	-1.40708	0.0902913	-15.5837	9.38867e-55	3.36979e-53
MGAT4A	854.73	-1.37901	0.0674467	-20.4459	6.52815e-93	4.54599e-91
CTSG	2140.35	-1.37655	0.045985	-29.9347	6.95591e-197	1.6427e-194
NDST3	98.4481	-1.37515	0.174486	-7.88112	3.24451e-15	2.80772e-14
PRKXP1	120.527	-1.37115	0.168993	-8.11368	4.91076e-16	4.46545e-15
ABI3	405.691	-1.36863	0.0934339	-14.6481	1.38482e-48	4.17882e-47
CD84	884.973	-1.36836	0.0650494	-21.0356	3.09634e-98	2.34674e-96
IGLL1	37.3573	-1.36336	0.259147	-5.26096	1.43309e-07	6.65303e-07
IRF4	36.3316	-1.36283	0.256245	-5.31846	1.04648e-07	4.93414e-07
ATP11A	1453.7	-1.35552	0.0526758	-25.7333	4.96189e-146	6.57349e-144
PRMT3	543.523	-1.35467	0.0820867	-16.5029	3.49515e-61	1.41675e-59
HHIP-AS1	282.713	-1.35412	0.113794	-11.8998	1.18623e-32	2.28483e-31
FAM136A	1617.25	-1.34842	0.0500515	-26.9407	7.32772e-160	1.1056e-157
LOC101059954	17.0929	-1.34051	0.305638	-4.38592	1.15494e-05	4.26559e-05
GYPC	1735.4	-1.33542	0.0485403	-27.5116	1.27584e-166	2.1656e-164
ANGPT1	36.4348	-1.33241	0.257535	-5.17372	2.2948e-07	1.04365e-06
ANXA2R	80.5055	-1.33174	0.188965	-7.04756	1.82082e-12	1.29282e-11
CXXC5	33.7047	-1.32528	0.260855	-5.08051	3.76426e-07	1.66862e-06
LIPT1	52.2508	-1.31644	0.221692	-5.93816	2.88244e-09	1.57668e-08
FAM222A-AS1	11.6298	-1.31411	0.320307	-4.10266	4.08436e-05	0.000139938
NRROS	328.485	-1.30756	0.103777	-12.5996	2.1213e-36	4.60888e-35
TNFAIP8L2	22.9025	-1.30404	0.287225	-4.54016	5.62126e-06	2.15838e-05
FAM95C	179.079	-1.30236	0.135241	-9.62991	5.97793e-22	7.4931e-21
PGLYRP3	5.64744	-1.29956	0.314027	-4.13836	3.49795e-05	0.000120991
IKZF3	405.124	-1.2975	0.0930699	-13.9411	3.56451e-44	9.52192e-43
TMEM99	236.238	-1.29259	0.122492	-10.5525	4.94813e-26	7.42448e-25
C9orf41	984.069	-1.28042	0.0618208	-20.7117	2.71452e-95	1.97469e-93
TNFAIP3	4083.2	-1.27534	0.0338713	-37.6527	0	0
LOC102723506	111.211	-1.27489	0.169866	-7.50528	6.12981e-14	4.86533e-13
EVL	2963.89	-1.27438	0.0405707	-31.4113	1.41759e-216	4.19994e-214
APOL6	2094.84	-1.27191	0.0437205	-29.0918	4.56072e-186	9.65155e-184
LOC102724733	14.3072	-1.26978	0.315565	-4.02384	5.72564e-05	0.000191816
ZBTB16	464.105	-1.26853	0.0867365	-14.6251	1.94218e-48	5.84986e-47
ARHGEF9	84.9034	-1.26676	0.195651	-6.4746	9.50605e-11	5.88083e-10
TERT	144.812	-1.25924	0.152555	-8.25435	1.52728e-16	1.42946e-15
GBP2	555.518	-1.25172	0.0804038	-15.568	1.20182e-54	4.29465e-53
C15orf54	6.62571	-1.24385	0.318835	-3.90123	9.57051e-05	0.000311778
SDC4	4216.57	-1.23917	0.0341264	-36.3113	1.07343e-288	6.20266e-286
ABCC4	632.442	-1.23251	0.0739345	-16.6703	2.15491e-62	9.00365e-61
RCSD1	1337.86	-1.23039	0.0601868	-20.4428	6.95792e-93	4.80421e-91
MYCN	167.351	-1.2287	0.137396	-8.94274	3.79642e-19	4.07796e-18
CCNC	2151.26	-1.22454	0.0435537	-28.1157	6.30017e-174	1.14068e-171
C5orf54	18.526	-1.22453	0.300321	-4.07743	4.5537e-05	0.000154847
SNX30	245.342	-1.22419	0.120219	-10.183	2.36271e-24	3.34204e-23
SLC2A3	684.274	-1.22321	0.0725364	-16.8635	8.3547e-64	3.58263e-62
ZNF132	7.66666	-1.22076	0.321962	-3.79162	0.000149666	0.000475587
PITPNM2	1009.9	-1.21852	0.0615882	-19.785	4.00657e-87	2.42703e-85
ARL4C	483.581	-1.21424	0.0908046	-13.372	8.81206e-41	2.15929e-39
TRAF3IP3	558.353	-1.21414	0.0820465	-14.7982	1.50462e-49	4.66119e-48
PARP12	220.573	-1.21367	0.125958	-9.63551	5.66079e-22	7.10651e-21
RP11-265P11.2	19.1555	-1.21164	0.30091	-4.02659	5.65926e-05	0.000189787
LOC101927110	20.423	-1.21009	0.299395	-4.04177	5.30503e-05	0.000178385
TMEM229B	79.6808	-1.20551	0.190615	-6.32434	2.54318e-10	1.51688e-09
ZNF670	193.279	-1.20327	0.134627	-8.93782	3.96931e-19	4.25806e-18
GIMAP2	529.861	-1.20207	0.0822851	-14.6086	2.47445e-48	7.39838e-47
HDAC9	74.0127	-1.19758	0.194805	-6.14755	7.86891e-10	4.53569e-09
FBXO4	228.499	-1.19718	0.118182	-10.13	4.0678e-24	5.69457e-23
C11orf45	23.4964	-1.19565	0.283534	-4.21696	2.47617e-05	8.76205e-05
EEF2K	235.953	-1.19559	0.117421	-10.1821	2.38473e-24	3.36734e-23
C21orf67	306.284	-1.19326	0.111312	-10.72	8.19958e-27	1.26887e-25
PPARGC1B	177.336	-1.1921	0.143485	-8.30819	9.7173e-17	9.21672e-16
DLEU1	114.564	-1.18985	0.162143	-7.33828	2.16349e-13	1.64508e-12
PRKCQ-AS1	262.86	-1.18893	0.113788	-10.4486	1.48628e-25	2.19574e-24
TMEM223	108.075	-1.18676	0.169244	-7.01211	2.34745e-12	1.64736e-11
LINC00974	6.55074	-1.184	0.32053	-3.69387	0.000220866	0.000683833
ZNF443	313.798	-1.17902	0.102717	-11.4783	1.69494e-30	3.01189e-29
GATA3-AS1	29.3776	-1.17875	0.269635	-4.37164	1.23317e-05	4.54422e-05
ARL6IP5	1570.14	-1.17571	0.0531758	-22.1098	2.54236e-108	2.16899e-106
C20orf197	104.58	-1.17362	0.174361	-6.73099	1.68509e-11	1.10944e-10
HYLS1	92.7512	-1.17185	0.17654	-6.63789	3.18203e-11	2.04622e-10
CRIP2	17.3664	-1.16973	0.30341	-3.85528	0.000115598	0.000372563
CSTA	18.5903	-1.16695	0.302629	-3.85606	0.000115229	0.000371444
CD226	68.8563	-1.16583	0.197818	-5.89344	3.7823e-09	2.051e-08
AK2	3300.46	-1.16191	0.0384855	-30.191	3.11268e-200	7.57031e-198
MAP7D2	189.928	-1.16177	0.128651	-9.03039	1.71065e-19	1.8771e-18
CD40LG	75.9727	-1.16156	0.194584	-5.96946	2.38033e-09	1.30994e-08
MID1IP1	999.671	-1.16093	0.0595347	-19.5	1.09694e-84	6.40666e-83
RCBTB2	128.357	-1.15922	0.158047	-7.33468	2.22254e-13	1.68762e-12
SLC32A1	17.6915	-1.15858	0.301404	-3.84396	0.000121067	0.000389262
PARP9	584.823	-1.15852	0.082517	-14.0397	8.90749e-45	2.45182e-43
HERC3	261.595	-1.15517	0.115945	-9.96304	2.21188e-23	2.98366e-22
OXNAD1	209.966	-1.15508	0.122469	-9.43159	4.03928e-21	4.85399e-20
PIK3C2B	1114.38	-1.15432	0.0687225	-16.7968	2.57472e-63	1.08974e-61
SIX5	176.806	-1.15411	0.137785	-8.37611	5.47054e-17	5.26225e-16
ATP8A2	227.174	-1.15224	0.118908	-9.69015	3.32053e-22	4.20746e-21
SNHG4	172.837	-1.15144	0.136658	-8.42571	3.58562e-17	3.47991e-16
AARD	21.0041	-1.14982	0.293638	-3.91576	9.01181e-05	0.000294993
ARL5B	2739.74	-1.14728	0.0418789	-27.3953	3.11901e-165	5.08242e-163
ICAM1	821.402	-1.14658	0.0661843	-17.324	3.09899e-67	1.41056e-65
C9orf72	125.256	-1.1464	0.154978	-7.39714	1.39153e-13	1.07058e-12
PROSER2-AS1	14.9563	-1.14355	0.310436	-3.6837	0.000229874	0.000710104
TOX	1941.86	-1.14352	0.0452909	-25.2483	1.18284e-140	1.49414e-138
LTA-2	282.513	-1.14242	0.112683	-10.1384	3.73177e-24	5.23316e-23
LOC440934	15.4657	-1.14143	0.314439	-3.63004	0.000283373	0.000862773
GATSL3	78.4701	-1.1377	0.188754	-6.02741	1.66608e-09	9.31029e-09
PLCH1	87.8598	-1.13668	0.179882	-6.31904	2.63189e-10	1.56864e-09
ANP32A	6769.81	-1.13664	0.0308726	-36.8171	9.81737e-297	6.15285e-294
CLOCK	518.988	-1.13524	0.0826892	-13.729	6.81021e-43	1.7699e-41
CDPF1	116.974	-1.13462	0.181264	-6.25947	3.86276e-10	2.27562e-09
SLC31A2	349.337	-1.13177	0.101713	-11.127	9.26805e-29	1.5442e-27
C19orf59	23.3672	-1.13119	0.287396	-3.93599	8.2853e-05	0.000272305
JAZF1	70.4319	-1.12834	0.19957	-5.65386	1.56885e-08	8.03659e-08
PANK1	69.5265	-1.1272	0.206339	-5.46283	4.68607e-08	2.29377e-07
HSBP1L1	29.9703	-1.12705	0.267612	-4.2115	2.53677e-05	8.9609e-05
NIF3L1	517.102	-1.12687	0.0813517	-13.8518	1.24032e-43	3.26511e-42
RARA	698.228	-1.12569	0.0729815	-15.4244	1.12244e-53	3.90816e-52
LOC102724856	10.8307	-1.11963	0.322297	-3.47392	0.000512912	0.00150133
SCD	3612.77	-1.11703	0.0348606	-32.0428	2.76391e-225	9.00758e-223
CPA3	14.8377	-1.10965	0.312882	-3.54653	0.000390346	0.0011639
GDF10	15.5835	-1.10925	0.307727	-3.60466	0.000312561	0.000946338
CPB2	17.8186	-1.10791	0.302562	-3.66176	0.000250492	0.000768838
GNGT2	113.426	-1.10546	0.161134	-6.86047	6.86363e-12	4.6543e-11
LYSMD2	235.821	-1.10478	0.12056	-9.16374	5.0127e-20	5.62548e-19
STAP1	10.8694	-1.10423	0.32075	-3.44266	0.000576026	0.00167344
UNG	702.797	-1.10134	0.0726609	-15.1573	6.78271e-52	2.23733e-50
C21orf91	1362.11	-1.09858	0.0541247	-20.2971	1.36306e-91	9.14034e-90
SPN	5608.66	-1.09517	0.0366533	-29.8792	3.66662e-196	8.41515e-194
NFE2L3	1012.48	-1.0925	0.061176	-17.8582	2.49472e-71	1.20986e-69
P4HA1	812.754	-1.0897	0.0715254	-15.2352	2.0657e-52	6.94032e-51
PAFAH1B2	1230.07	-1.08523	0.0564709	-19.2174	2.64532e-82	1.49672e-80
CHD7	173.703	-1.08418	0.135937	-7.97559	1.51655e-15	1.34232e-14
LOC100996506	37.3895	-1.08371	0.258434	-4.19337	2.74845e-05	9.64593e-05
MCIDAS	50.2734	-1.08342	0.22531	-4.80857	1.52015e-06	6.23164e-06
OGN	321.358	-1.08069	0.101171	-10.6818	1.23854e-26	1.90575e-25
HCK	19.814	-1.07866	0.293631	-3.67352	0.000239229	0.00073621
RHOU	150.13	-1.07815	0.149692	-7.20249	5.91235e-13	4.36133e-12
HSPA4L	372.492	-1.07594	0.0986173	-10.9102	1.03001e-27	1.64549e-26
IRF1	7438.86	-1.0748	0.027899	-38.5247	0	0
P2RX5	68.843	-1.06957	0.204519	-5.22971	1.6978e-07	7.83508e-07
TMIE	53.7795	-1.06837	0.218	-4.90078	9.54559e-07	4.02134e-06
RASSF4	167.35	-1.066	0.139603	-7.63596	2.24136e-14	1.82798e-13
ARL2BP	810.603	-1.0657	0.065363	-16.3043	9.19411e-60	3.63636e-58
NEIL2	269.623	-1.06477	0.110816	-9.60844	7.36534e-22	9.1968e-21
TBX21	511.043	-1.06361	0.0833074	-12.7673	2.49606e-37	5.59468e-36
YOD1	1380.21	-1.06338	0.0534979	-19.8771	6.42716e-88	3.98215e-86
ZBTB7C	15.2873	-1.06302	0.310164	-3.42728	0.000609663	0.00176518
HDHD1	358.161	-1.06204	0.0985969	-10.7715	4.69255e-27	7.31024e-26
ARHGEF39	136.206	-1.06026	0.148345	-7.14726	8.85299e-13	6.44015e-12
IRF2	465.738	-1.06025	0.0928022	-11.4249	3.14057e-30	5.51461e-29
SAMD10	507.792	-1.05879	0.0859935	-12.3124	7.76631e-35	1.58985e-33
NEAT1	336.162	-1.05866	0.115457	-9.16931	4.76057e-20	5.35359e-19
RTP4	41.4655	-1.05776	0.241984	-4.37119	1.23571e-05	4.55253e-05
ALDH5A1	1343.51	-1.05619	0.0523092	-20.1913	1.16812e-90	7.67522e-89
ANGEL2	622.077	-1.0549	0.0763782	-13.8116	2.16978e-43	5.68435e-42
TLR7	11.1954	-1.05357	0.321268	-3.27943	0.00104018	0.00289788
PLD6	126.611	-1.0522	0.160465	-6.55721	5.48226e-11	3.46791e-10
CSNK1G1	1900.05	-1.04926	0.0446437	-23.5031	3.79596e-122	3.86594e-120
TTC26	408.077	-1.04535	0.0923167	-11.3236	1.00321e-29	1.73908e-28
CECR1	252.658	-1.04351	0.113103	-9.22619	2.80416e-20	3.20434e-19
ALMS1-IT1	21.8931	-1.04347	0.286196	-3.64601	0.000266344	0.000814577
C16orf54	77.7201	-1.04094	0.191887	-5.42473	5.80428e-08	2.81742e-07
TBC1D24	231.229	-1.04066	0.118567	-8.77697	1.67941e-18	1.75423e-17
PNCK	6.42796	-1.0406	0.319374	-3.25826	0.00112097	0.00309743
CNR2	23.5318	-1.0402	0.284386	-3.65772	0.000254466	0.000780448
RNF44	953.673	-1.0389	0.0618114	-16.8075	2.14965e-63	9.122e-62
SLC19A1	993.515	-1.03572	0.0615369	-16.8308	1.45117e-63	6.19028e-62
LOC102724476	49.7031	-1.03408	0.229861	-4.49871	6.83674e-06	2.59624e-05
SGPP2	34.295	-1.03366	0.253638	-4.07532	4.59505e-05	0.000156155
MSMO1	661.427	-1.03291	0.0739435	-13.9689	2.41374e-44	6.49041e-43
KIF20A	855.275	-1.02968	0.0640029	-16.088	3.09867e-58	1.19087e-56
EEF1A2	161.056	-1.02967	0.139045	-7.40527	1.30882e-13	1.00933e-12
FAM201A	229.581	-1.0289	0.122342	-8.41003	4.09917e-17	3.95477e-16
LPAR4	16.7783	-1.02662	0.303656	-3.38086	0.000722592	0.00206754
FGR	93.6343	-1.02468	0.176594	-5.80247	6.53469e-09	3.47076e-08
TXNIP	190.409	-1.02147	0.136139	-7.50318	6.22857e-14	4.93891e-13
ZCCHC5	7.35921	-1.02025	0.321946	-3.16902	0.00152954	0.00411679
LOC101928130	8.20105	-1.01863	0.323349	-3.15023	0.00163139	0.00436297
MORF4L2	2926.89	-1.01755	0.0375627	-27.0893	1.31732e-161	2.02507e-159
VEGFA	317.606	-1.01737	0.101797	-9.9941	1.61755e-23	2.202e-22
MFAP3	656.013	-1.01232	0.0768805	-13.1674	1.35151e-39	3.22444e-38
TMEM92	7.82963	-1.01169	0.322762	-3.13448	0.00172156	0.00458755
MB	5.83923	-1.01093	0.31559	-3.2033	0.00135862	0.00369224
SAMD13	10.5381	-1.00923	0.32059	-3.14803	0.00164375	0.00439242
ATP12A	5.13751	-1.00888	0.312578	-3.22761	0.00124831	0.00341811
BCL3	199.436	-1.00826	0.134263	-7.5096	5.93083e-14	4.71659e-13
SLC9A6	404.412	-1.0076	0.0929068	-10.8453	2.09902e-27	3.31752e-26
ELK4	2244.7	-1.00251	0.0437361	-22.9217	2.8202e-116	2.62601e-114
DTX3L	1186.18	-1.00134	0.0555595	-18.0228	1.2898e-72	6.44701e-71
FAM78A	378.442	-1.00106	0.0965547	-10.3678	3.47522e-25	5.08337e-24
TMC8	1578.89	-0.997974	0.0491226	-20.316	9.28739e-92	6.27959e-90
KLLN	54.9056	-0.996144	0.218183	-4.56563	4.97988e-06	1.92246e-05
ID1	699.277	-0.99458	0.0711216	-13.9842	1.94608e-44	5.25894e-43
TRPM6	29.2364	-0.994191	0.267029	-3.72315	0.000196751	0.000614304
LOC102723864	7.99646	-0.993917	0.32331	-3.07419	0.00211073	0.0055332
PTPRCAP	870.274	-0.993088	0.0654818	-15.1659	5.95211e-52	1.97133e-50
SH3KBP1	1742.4	-0.988586	0.0513601	-19.2481	1.46401e-82	8.31278e-81
TSPAN7	4118.29	-0.987301	0.0330668	-29.8578	6.96337e-196	1.57595e-193
GPA33	32.4454	-0.986515	0.257736	-3.82763	0.000129385	0.000414372
FAM206A	483.041	-0.986306	0.0879176	-11.2185	3.30765e-29	5.60271e-28
NIP7	1645.25	-0.985767	0.0475395	-20.7357	1.64952e-95	1.21076e-93
MTMR4	1443.38	-0.985173	0.0508724	-19.3656	1.50667e-83	8.67535e-82
AKR1A1	1705.98	-0.984102	0.0478744	-20.5559	6.81247e-94	4.80559e-92
MCF2L	42.6429	-0.982971	0.235503	-4.17392	2.99407e-05	0.000104517
NCOA7	981.473	-0.981761	0.0636528	-15.4237	1.13421e-53	3.94073e-52
NUDT19	136.437	-0.980125	0.148215	-6.61288	3.76924e-11	2.40484e-10
CCDC69	356.702	-0.979042	0.100981	-9.69531	3.15687e-22	4.00944e-21
DGUOK-AS1	28.953	-0.976395	0.267967	-3.64371	0.000268732	0.000821572
CLEC2D	70.7174	-0.976122	0.203638	-4.79342	1.63966e-06	6.69126e-06
ANGPTL6	105.484	-0.975318	0.167718	-5.81522	6.05535e-09	3.22668e-08
NIPSNAP3A	505.906	-0.975257	0.0838984	-11.6243	3.10245e-31	5.64224e-30
GP5	17.1696	-0.974262	0.302246	-3.2234	0.00126677	0.00346459
GPR68	479.405	-0.974005	0.0830886	-11.7225	9.7749e-32	1.81415e-30
MYO7B	6889.75	-0.973677	0.0320996	-30.333	4.21338e-202	1.05626e-199
SLCO4C1	8.26681	-0.97355	0.322721	-3.01669	0.00255547	0.00660451
IKZF2	1598.5	-0.973518	0.0489211	-19.8997	4.09048e-88	2.5538e-86
STAMBPL1	902.803	-0.97281	0.0641353	-15.1681	5.75183e-52	1.91278e-50
FOPNL	68.4026	-0.971967	0.201244	-4.8298	1.36671e-06	5.64239e-06
TAPBP-5	18.1068	-0.970226	0.299797	-3.23628	0.00121099	0.00332767
VIPR2	79.7846	-0.970081	0.202745	-4.78474	1.71208e-06	6.97631e-06
HSD3B2	4.87356	-0.969961	0.311584	-3.11301	0.00185193	0.00491004
SEMA4A	374.18	-0.967766	0.097729	-9.90255	4.0578e-23	5.3933e-22
ANAPC7	1288.84	-0.965814	0.0534296	-18.0764	4.89184e-73	2.46788e-71
UBASH3A	983.762	-0.965327	0.0615357	-15.6873	1.84825e-55	6.72259e-54
NKX2-2	33.9774	-0.964357	0.254237	-3.79314	0.000148754	0.000472965
DGKA	2595.05	-0.963741	0.0424095	-22.7246	2.55762e-114	2.34137e-112
ZBED6CL	355.901	-0.963274	0.0984243	-9.78695	1.28099e-22	1.65796e-21
TUSC3	454.076	-0.96231	0.0864614	-11.1299	8.96976e-29	1.49603e-27
MYB	4037.92	-0.962057	0.0349173	-27.5524	4.14135e-167	7.10351e-165
AK3	628.981	-0.96078	0.0730956	-13.1442	1.83831e-39	4.37302e-38
STX16-NPEPL1	8.70248	-0.959982	0.323184	-2.97039	0.00297426	0.00758697
MSL2	1218.74	-0.958436	0.0560772	-17.0914	1.72063e-65	7.59829e-64
ASS1	214.082	-0.958008	0.119647	-8.00696	1.17579e-15	1.04639e-14
BMF	149.263	-0.957868	0.141568	-6.76612	1.32278e-11	8.77993e-11
SLAMF6	1096.29	-0.956616	0.05891	-16.2386	2.6896e-59	1.06119e-57
F2RL2	161.892	-0.955373	0.139777	-6.83497	8.20225e-12	5.54128e-11
GAS7	7582.74	-0.953054	0.027161	-35.0891	9.89098e-270	4.60496e-267
HIF1A	2234.15	-0.951424	0.041512	-22.9193	2.9862e-116	2.76478e-114
DBN1	2012.94	-0.950795	0.0439717	-21.6229	1.09431e-103	8.78412e-102
PTPN7	16506.6	-0.950167	0.0213811	-44.4397	0	0
FUT8	570.343	-0.94997	0.0760763	-12.4871	8.78313e-36	1.86113e-34
SH2D1A	1215.32	-0.948748	0.0564323	-16.8122	1.9879e-63	8.45766e-62
HRH2	22.8599	-0.945976	0.287243	-3.2933	0.000990204	0.00277193
TBKBP1	563.74	-0.943808	0.0794588	-11.878	1.54077e-32	2.95028e-31
NCR3LG1	438.169	-0.943723	0.0867802	-10.8749	1.51876e-27	2.40975e-26
MUC1	107.544	-0.939794	0.166433	-5.64668	1.63571e-08	8.36859e-08
PIK3R2	643.933	-0.938149	0.0719274	-13.043	6.96703e-39	1.62881e-37
FAM102B	773.972	-0.937958	0.0666861	-14.0653	6.20888e-45	1.71772e-43
LYST	883.039	-0.937193	0.0629437	-14.8894	3.86363e-50	1.2084e-48
FAM117A	526.515	-0.936442	0.0809852	-11.5631	6.3356e-31	1.14328e-29
LPAR5	219.668	-0.936	0.123523	-7.57753	3.52194e-14	2.83828e-13
RNF208	155.883	-0.935377	0.139221	-6.71863	1.83446e-11	1.20486e-10
POLR3G	794.172	-0.935076	0.0668496	-13.9878	1.85155e-44	5.02012e-43
RAB37	135.464	-0.934389	0.154658	-6.04164	1.52557e-09	8.56329e-09
PGBD5	328.368	-0.933689	0.100294	-9.30949	1.2845e-20	1.5015e-19
LINC01152	20.1724	-0.933556	0.294397	-3.17107	0.00151876	0.00409332
ALDH3A2	405.771	-0.932105	0.0896768	-10.394	2.63922e-25	3.87094e-24
AGPS	1314.16	-0.931635	0.0528789	-17.6183	1.78332e-69	8.42296e-68
LOC102724413	15.7982	-0.929045	0.307671	-3.01961	0.00253102	0.00654547
FAM46C	693.234	-0.926853	0.0739533	-12.533	4.92922e-36	1.05133e-34
EHBP1L1	716.541	-0.926017	0.068298	-13.5585	7.05923e-42	1.77516e-40
SASH3	684.382	-0.924912	0.0713732	-12.9588	2.09482e-38	4.82135e-37
LOC101928793	91.5435	-0.922655	0.179617	-5.13678	2.79483e-07	1.25702e-06
TREML2	61.6849	-0.922384	0.203796	-4.526	6.01092e-06	2.29939e-05
TBL1X	300.429	-0.92227	0.104053	-8.86342	7.75937e-19	8.21566e-18
IQSEC2	8.02906	-0.92082	0.323338	-2.84785	0.00440156	0.0108597
GALNT9	18.0582	-0.919876	0.300003	-3.06622	0.00216784	0.00567287
ALG14	375.379	-0.919104	0.0952544	-9.64894	4.96662e-22	6.26401e-21
LOC284561	14.3208	-0.918747	0.312447	-2.94048	0.00327699	0.00829299
CAMSAP1	949.02	-0.917505	0.0680574	-13.4813	2.01404e-41	4.98766e-40
SARDH	702.013	-0.915502	0.0739426	-12.3813	3.30154e-35	6.8359e-34
IGF1R	436.606	-0.915186	0.0905957	-10.1019	5.42034e-24	7.5491e-23
KIAA1279	338.243	-0.914944	0.0974388	-9.38994	6.00371e-21	7.14612e-20
CD274	352.576	-0.914628	0.0978261	-9.34953	8.8038e-21	1.0403e-19
IFI44	82.5332	-0.91398	0.185255	-4.93363	8.07138e-07	3.44031e-06
NUDT8	275.944	-0.913845	0.107663	-8.488	2.10225e-17	2.06736e-16
HSBP1	1077.58	-0.913678	0.0569429	-16.0455	6.14488e-58	2.34498e-56
APOL2	498.252	-0.91363	0.0827126	-11.0458	2.29614e-28	3.76414e-27
MFNG	1029.47	-0.913533	0.0611124	-14.9484	1.59498e-50	5.04664e-49
ALDH1B1	24.7375	-0.912779	0.283638	-3.21811	0.00129036	0.00352117
BTN3A2	281.76	-0.912509	0.10812	-8.43977	3.17954e-17	3.09687e-16
CCND3	2847.51	-0.911033	0.0395597	-23.0293	2.37129e-117	2.24652e-115
TLE1	56.9236	-0.910486	0.22003	-4.13801	3.50325e-05	0.000121149
CTRL	88.9004	-0.910126	0.17814	-5.10904	3.23806e-07	1.44639e-06
PRKCH	1547.52	-0.909728	0.0484311	-18.784	1.02134e-78	5.51083e-77
ZBTB8A	136.095	-0.908037	0.152942	-5.93711	2.90083e-09	1.58621e-08
NFYA	2558.58	-0.90791	0.0392075	-23.1565	1.24961e-118	1.19078e-116
ZFP36L2	570.312	-0.907668	0.0778457	-11.6598	2.04417e-31	3.72593e-30
IFIT5	500.272	-0.90676	0.0840296	-10.791	3.79811e-27	5.92817e-26
ARMC2-AS1	36.046	-0.906753	0.254058	-3.56908	0.000358239	0.00107366
TRAM2	450.405	-0.905006	0.0855087	-10.5838	3.54343e-26	5.34137e-25
BLK	223.087	-0.904878	0.121284	-7.4608	8.59974e-14	6.75339e-13
C12orf10	803.632	-0.903176	0.0684562	-13.1935	9.5665e-40	2.28908e-38
PTCH1	74.9052	-0.903071	0.190809	-4.73286	2.2138e-06	8.90933e-06
TMEM243	399.953	-0.902419	0.0920796	-9.80042	1.12118e-22	1.4604e-21
RSG1	33.4377	-0.90209	0.257539	-3.50273	0.000460509	0.0013577
COL15A1	8.45931	-0.901617	0.323375	-2.78815	0.00530106	0.0128314
C1orf131	717.534	-0.901338	0.0711486	-12.6684	8.85084e-37	1.95162e-35
CLDN12	157.788	-0.900575	0.143011	-6.29726	3.02944e-10	1.80032e-09
SLA	8888.46	-0.900211	0.0518138	-17.374	1.29882e-67	5.92835e-66
LRP5	702.882	-0.900105	0.0721103	-12.4823	9.32119e-36	1.97002e-34
REPIN1	2085.22	-0.898801	0.0476351	-18.8685	2.07168e-79	1.12758e-77
MBLAC2	144.764	-0.897987	0.150125	-5.9816	2.20958e-09	1.21927e-08
INPP4B	32.0505	-0.89795	0.262898	-3.41559	0.000636445	0.00183653
FAM174B	114.781	-0.896926	0.162402	-5.52288	3.33489e-08	1.65778e-07
NREP	165.709	-0.896409	0.137247	-6.53135	6.518e-11	4.09133e-10
TYSND1	281.641	-0.895332	0.106815	-8.38208	5.20009e-17	5.00505e-16
LRRC6	72.6536	-0.894892	0.192726	-4.64335	3.42811e-06	1.3493e-05
UBL4A	425.863	-0.894834	0.0882521	-10.1395	3.68903e-24	5.17767e-23
LINC00641	564.894	-0.893758	0.0764061	-11.6975	1.31303e-31	2.4176e-30
MUC2	12.7858	-0.892476	0.317776	-2.80851	0.00497714	0.0121429
ZYG11B	192.097	-0.890555	0.128382	-6.93676	4.01198e-12	2.77014e-11
SELP	27.1073	-0.889793	0.274167	-3.24545	0.00117266	0.00323035
DUSP5P1	24.443	-0.889568	0.284269	-3.12931	0.00175214	0.00466024
UBLCP1	1415.36	-0.888178	0.0504841	-17.5932	2.77602e-69	1.30738e-67
GIPC1	289.308	-0.885867	0.104898	-8.44501	3.04016e-17	2.96465e-16
POU3F2	37.7312	-0.885862	0.244676	-3.62055	0.000293974	0.000893047
TPO	61.9525	-0.885346	0.203567	-4.34917	1.36652e-05	5.00506e-05
AKAP5	103.583	-0.884312	0.16559	-5.34038	9.27534e-08	4.40261e-07
LZTFL1	540.544	-0.882788	0.0780777	-11.3065	1.21812e-29	2.10267e-28
PDK3	349.869	-0.881893	0.0993437	-8.8772	6.85675e-19	7.29313e-18
LINC00528	53.9849	-0.880252	0.216856	-4.05915	4.92527e-05	0.000166509
LINC00852	35.2294	-0.879846	0.249367	-3.52831	0.000418221	0.00124156
SSBP4	1702.35	-0.87904	0.0501714	-17.5207	9.95539e-69	4.63494e-67
EXTL2	389.732	-0.878337	0.092869	-9.4578	3.14496e-21	3.7989e-20
DLX3	52.9366	-0.878005	0.216407	-4.0572	4.96644e-05	0.000167657
C10orf107	8.43176	-0.877597	0.323274	-2.71471	0.00663331	0.0157588
RASGRP2	389.992	-0.877504	0.0935117	-9.38389	6.35803e-21	7.55132e-20
ZAP70	6609.82	-0.876089	0.032309	-27.1159	6.3917e-162	9.9193e-160
ZBTB41	748.087	-0.875091	0.0753214	-11.6181	3.33525e-31	6.0521e-30
PDE8B	11.0137	-0.874482	0.319871	-2.73386	0.00625968	0.0149234
CEP44	323.844	-0.87362	0.102204	-8.54781	1.25451e-17	1.24953e-16
TNRC6C-AS1	229.777	-0.871455	0.11746	-7.41915	1.17877e-13	9.1293e-13
FSD2	31.4512	-0.87064	0.261716	-3.32666	0.000878931	0.00248995
SLC16A7	1066.12	-0.869934	0.0566533	-15.3554	3.25885e-53	1.12031e-51
ZNF575	51.8328	-0.869213	0.231043	-3.76212	0.000168479	0.000530916
SNORD80	69.8294	-0.867223	0.195533	-4.43518	9.19942e-06	3.4366e-05
TMPRSS3	100.797	-0.865293	0.167487	-5.16632	2.38751e-07	1.08369e-06
SCCPDH	1525.29	-0.864473	0.0518875	-16.6605	2.5379e-62	1.05768e-60
MED22	650.02	-0.863479	0.0748623	-11.5342	8.86744e-31	1.59311e-29
C4orf27	866.967	-0.862335	0.0628598	-13.7184	7.87986e-43	2.03813e-41
TRAF3IP2	40.9502	-0.861954	0.23742	-3.63051	0.000282866	0.00086139
PDZD11	595.491	-0.861045	0.0746996	-11.5268	9.67102e-31	1.73556e-29
PSTPIP2	15.5769	-0.860584	0.307534	-2.79834	0.00513663	0.0124821
TENM1	10.4076	-0.860329	0.32084	-2.68149	0.00732946	0.0172194
TESPA1	4013.07	-0.859686	0.0336958	-25.5131	1.40988e-143	1.82333e-141
KL	99.5509	-0.858849	0.169798	-5.05807	4.23529e-07	1.86878e-06
C10orf10	4.3382	-0.856832	0.30625	-2.79782	0.00514496	0.0124962
C21orf15	53.6983	-0.855231	0.215322	-3.97187	7.13099e-05	0.000235747
NUGGC	43.1897	-0.854501	0.235724	-3.62501	0.000288954	0.000878779
FMOD	8.44557	-0.854329	0.323277	-2.64271	0.00822447	0.0191203
ANKRD22	12.631	-0.8534	0.315337	-2.70631	0.00680353	0.0161355
MAZ	7000.99	-0.853382	0.0297479	-28.6871	5.52304e-181	1.08431e-178
LOC100129781	3.82946	-0.852973	0.299768	-2.84544	0.00443502	0.0109283
DROSHA	1743.13	-0.851376	0.0464839	-18.3155	6.22736e-75	3.2524e-73
STYK1	28.0351	-0.851375	0.273544	-3.11239	0.00185582	0.00491797
MRI1	216.166	-0.851234	0.119543	-7.12076	1.07332e-12	7.76974e-12
POLM	586.18	-0.851107	0.0755816	-11.2608	2.04955e-29	3.50445e-28
CAMSAP2	170.118	-0.851074	0.134014	-6.35062	2.14453e-10	1.28569e-09
GBP4	5.77339	-0.851066	0.317623	-2.67948	0.00737361	0.017306
ETV6	218.093	-0.850933	0.127489	-6.67454	2.48013e-11	1.61011e-10
TTC24	149.684	-0.849657	0.141998	-5.98357	2.18299e-09	1.20623e-08
NBPF23P	10.7006	-0.849226	0.319586	-2.65727	0.00787761	0.0183852
TRIM2	29.6511	-0.849104	0.264366	-3.21185	0.00131883	0.0035925
MYADM	427.968	-0.848122	0.0912749	-9.29195	1.51492e-20	1.75949e-19
HAPLN3	521.208	-0.846987	0.0838841	-10.0971	5.68917e-24	7.90998e-23
KCNA3	252.477	-0.846686	0.113959	-7.42973	1.08818e-13	8.47203e-13
APOL3	59.4265	-0.846281	0.207804	-4.07251	4.65101e-05	0.000157925
CCDC15	114.399	-0.845946	0.1641	-5.15507	2.53539e-07	1.14764e-06
WDR41	660.754	-0.845775	0.0719442	-11.756	6.57869e-32	1.23787e-30
SLC25A40	681.907	-0.841917	0.0707706	-11.8964	1.23545e-32	2.37683e-31
LOC102723814	6.17875	-0.841719	0.319515	-2.63436	0.00842949	0.0195556
TTC39C	408.274	-0.839739	0.0906326	-9.26531	1.94503e-20	2.24464e-19
CALHM2	61.7038	-0.838694	0.211182	-3.97142	7.14443e-05	0.000236143
ARHGAP4	963.953	-0.837876	0.0616466	-13.5916	4.49124e-42	1.13641e-40
LPP-AS2	3.68544	-0.836949	0.299236	-2.79695	0.00515868	0.0125221
NR1D2	107.314	-0.836855	0.166673	-5.02093	5.14207e-07	2.24277e-06
DHRS13	116.518	-0.836177	0.163149	-5.12524	2.97155e-07	1.33209e-06
C5orf22	685.996	-0.834904	0.0712257	-11.7219	9.83832e-32	1.82384e-30
FLJ45825	4.21296	-0.834601	0.30533	-2.73344	0.00626763	0.014938
SHISA2	735.353	-0.834006	0.0682993	-12.211	2.71401e-34	5.46661e-33
EGR1	13971.2	-0.833318	0.0563432	-14.7901	1.69809e-49	5.25054e-48
STS	185.24	-0.833314	0.134509	-6.19523	5.81992e-10	3.39062e-09
MAPKAPK3	1492.1	-0.832989	0.0522331	-15.9475	2.96393e-57	1.12319e-55
SLC37A2	13.3386	-0.832946	0.312446	-2.66588	0.00767862	0.0179517
CPNE8	6.03477	-0.832206	0.319776	-2.60247	0.00925551	0.021281
LOC102724265	37.5038	-0.831098	0.244343	-3.40136	0.000670513	0.00192971
SH2D3C	353.429	-0.830756	0.0992884	-8.3671	5.90524e-17	5.67035e-16
IGIP	52.2715	-0.830682	0.221313	-3.75342	0.000174438	0.000548421
KCNA6	24.5115	-0.830676	0.281083	-2.95526	0.00312401	0.00793915
MOB3C	187.565	-0.830295	0.127618	-6.50608	7.71374e-11	4.81407e-10
SYNJ2BP	172.667	-0.829103	0.134487	-6.16494	7.05088e-10	4.0786e-09
TMEM69	346.69	-0.828586	0.0980139	-8.45376	2.82071e-17	2.75891e-16
PNMAL1	228.862	-0.828097	0.117582	-7.04271	1.8854e-12	1.33635e-11
CCDC88C	1310.03	-0.826781	0.0541408	-15.271	1.19406e-52	4.04514e-51
CEP112	162.205	-0.824711	0.136237	-6.05349	1.41744e-09	7.98658e-09
HBQ1	20.6842	-0.823267	0.291861	-2.82075	0.00479119	0.0117279
PTCRA	20.1632	-0.823148	0.292891	-2.81042	0.00494763	0.01208
LIAS	145.155	-0.822583	0.143874	-5.71739	1.08174e-08	5.62802e-08
DKFZP586I1420	76.4424	-0.822484	0.187867	-4.378	1.19771e-05	4.41753e-05
NAA16	561.224	-0.822468	0.0778471	-10.5652	4.3217e-26	6.5025e-25
ANKRD46	344.687	-0.822411	0.104601	-7.86235	3.76979e-15	3.23649e-14
SMG7-AS1	19.7096	-0.822131	0.293521	-2.80093	0.00509554	0.0123965
FAM117B	210.95	-0.822028	0.120768	-6.80665	9.99008e-12	6.6881e-11
UBXN8	610.675	-0.821355	0.0740246	-11.0957	1.31609e-28	2.17282e-27
LOC100507316	29.748	-0.821271	0.26534	-3.09516	0.00196704	0.00518823
GFRA1	229.832	-0.820946	0.116134	-7.06895	1.56111e-12	1.11572e-11
LRRC20	139.435	-0.819235	0.151296	-5.41478	6.13652e-08	2.96984e-07
FBXL4	235.649	-0.819141	0.113891	-7.19232	6.37009e-13	4.68837e-12
LINC00263	7.38803	-0.819071	0.322903	-2.53659	0.0111939	0.025208
GPR171	6.34681	-0.818049	0.321396	-2.5453	0.0109183	0.0246555
SGK1	565.787	-0.816737	0.0765803	-10.6651	1.48228e-26	2.27651e-25
SLC30A9	1787.15	-0.815808	0.0450634	-18.1035	2.98793e-73	1.51206e-71
ALDH6A1	193.827	-0.81574	0.128235	-6.36128	2.00076e-10	1.20349e-09
IKZF1	4386.74	-0.815027	0.0319951	-25.4735	3.87799e-143	4.97574e-141
NOX1	30.522	-0.813657	0.264434	-3.07698	0.00209111	0.00548803
DFFB	126.269	-0.813422	0.15619	-5.20792	1.90974e-07	8.75858e-07
RNF125	78.3898	-0.813318	0.187627	-4.33477	1.45916e-05	5.32518e-05
NUS1	1509.28	-0.813188	0.0497713	-16.3385	5.25391e-60	2.09321e-58
GIMAP1	142.173	-0.81222	0.146006	-5.56292	2.65296e-08	1.32893e-07
TRMT1L	421.6	-0.810734	0.0883668	-9.17465	4.53051e-20	5.11252e-19
C1orf228	1142.53	-0.80995	0.05859	-13.824	1.82575e-43	4.79076e-42
TARP	42.597	-0.809426	0.234779	-3.4476	0.000565583	0.00164575
DNAH11	25.33	-0.808965	0.274743	-2.94444	0.00323535	0.0081961
CDC20	2278.03	-0.8084	0.048175	-16.7805	3.3901e-63	1.42743e-61
LCP2	4486.62	-0.808329	0.0371546	-21.7558	6.08212e-105	5.00547e-103
AKR1C6P	15.3664	-0.807521	0.305796	-2.64072	0.00827308	0.0192201
TLCD1	58.4576	-0.807429	0.213023	-3.79034	0.000150443	0.000477777
ANKRD13D	438.906	-0.805632	0.0863957	-9.32491	1.11078e-20	1.30405e-19
CASS4	5.14546	-0.80535	0.312025	-2.58104	0.00985018	0.022496
PRKG2	88.9165	-0.804796	0.175891	-4.57553	4.75009e-06	1.83854e-05
ADCK3	272.939	-0.804726	0.107123	-7.51219	5.81458e-14	4.62639e-13
PPP3CA	1654.5	-0.804507	0.0511566	-15.7264	9.97754e-56	3.63723e-54
HAX1	1897	-0.802147	0.0459969	-17.4392	4.16156e-68	1.92104e-66
RAB3GAP1	979.188	-0.800953	0.0617983	-12.9607	2.04245e-38	4.70746e-37
NFATC3	1800.31	-0.800701	0.0487534	-16.4235	1.29896e-60	5.21344e-59
HAGHL	280.8	-0.800573	0.105571	-7.58325	3.36998e-14	2.7185e-13
DUSP7	441.613	-0.80036	0.0894741	-8.94515	3.71436e-19	3.99284e-18
ECSCR-2	3.53108	-0.799873	0.296931	-2.6938	0.00706423	0.0166635
LRRC8D	682.626	-0.799629	0.0726658	-11.0042	3.64715e-28	5.95493e-27
NFE2L2	3180.74	-0.798987	0.0368834	-21.6625	4.63232e-104	3.73681e-102
LOC102723863	17.6255	-0.798866	0.300912	-2.65482	0.00793514	0.0185142
ATF1	763.845	-0.798314	0.067506	-11.8258	2.87062e-32	5.45819e-31
PYHIN1	116.4	-0.797906	0.169214	-4.71537	2.41268e-06	9.67626e-06
SFXN1	5512.03	-0.794995	0.0288401	-27.5656	2.87695e-167	4.98723e-165
PCYT2	240.773	-0.794903	0.113729	-6.98947	2.75917e-12	1.92716e-11
SUPT4H1	2677.34	-0.794007	0.0389516	-20.3844	2.29818e-92	1.58012e-90
NXNL2	5.487	-0.793676	0.315673	-2.51424	0.0119291	0.0267084
WSB2	3606.45	-0.793441	0.0342498	-23.1663	9.96146e-119	9.54836e-117
HOXA7	49.8071	-0.793294	0.222125	-3.57139	0.000355091	0.00106521
AP1S2	565.819	-0.793192	0.0787857	-10.0677	7.67373e-24	1.06059e-22
HLA-DRB5	6.77786	-0.792606	0.321604	-2.46454	0.0137189	0.0303283
RNF166	686.092	-0.792371	0.0709446	-11.1689	5.79067e-29	9.74783e-28
POLE3	3533.37	-0.791721	0.0353861	-22.3738	7.08796e-111	6.24315e-109
GVINP1	114.417	-0.789412	0.163974	-4.81425	1.47753e-06	6.07068e-06
PAQR8	198.057	-0.78881	0.128085	-6.15847	7.34521e-10	4.24283e-09
ALAD	515.128	-0.788782	0.0797582	-9.88967	4.61544e-23	6.1195e-22
S1PR5	16.1347	-0.788689	0.304742	-2.58806	0.00965195	0.0220897
CD244	29.4621	-0.787372	0.27397	-2.87394	0.00405391	0.0100668
SNHG3	791.465	-0.787305	0.0666214	-11.8176	3.1661e-32	6.01301e-31
MTO1	874.75	-0.787291	0.0637326	-12.353	4.6904e-35	9.66246e-34
TMX1	1685.38	-0.786498	0.0465652	-16.8903	5.30551e-64	2.29319e-62
BTF3	8167.08	-0.785739	0.0265298	-29.6173	8.95688e-193	1.94603e-190
FGD5	18.3059	-0.784207	0.296748	-2.64267	0.00822542	0.0191203
DAPK1	77.2872	-0.784152	0.187005	-4.1932	2.75045e-05	9.65087e-05
LYRM7	321.822	-0.783578	0.105258	-7.44434	9.74321e-14	7.62563e-13
NFATC1	4068.99	-0.78346	0.0367118	-21.3408	4.74422e-101	3.68129e-99
AQP11	8.85412	-0.783105	0.322797	-2.426	0.0152664	0.0334184
MZB1	587.927	-0.783047	0.0806105	-9.71396	2.6292e-22	3.35759e-21
LOC101929356	8.91645	-0.782449	0.32289	-2.42327	0.0153816	0.0336252
GPD1L	336.586	-0.782259	0.096938	-8.06968	7.0481e-16	6.36281e-15
FBXO16	29.6586	-0.781571	0.268386	-2.91212	0.0035899	0.00902042
ZC3HAV1L	332.634	-0.781381	0.0991958	-7.87716	3.3491e-15	2.88749e-14
F12	247.814	-0.781055	0.120741	-6.46883	9.87635e-11	6.0845e-10
ARL2	264.018	-0.780336	0.109629	-7.11795	1.09545e-12	7.91593e-12
STK32C	30.4557	-0.780111	0.26351	-2.96046	0.00307183	0.00781385
GAS6	50.1896	-0.779541	0.230382	-3.38369	0.000715197	0.00204818
FHIT	47.2894	-0.77954	0.237276	-3.28537	0.00101848	0.00284327
BAG2	510.686	-0.779537	0.0794782	-9.80819	1.03817e-22	1.35553e-21
SARS2	539.448	-0.779508	0.0805073	-9.68245	3.58032e-22	4.52609e-21
FAM115C	28.087	-0.779402	0.266884	-2.92038	0.0034961	0.00880629
MANSC1	13.4583	-0.779305	0.314374	-2.47891	0.0131784	0.0292285
HOXA1	167.627	-0.779259	0.135633	-5.74534	9.17366e-09	4.81277e-08
ZNF876P	12.8905	-0.7792	0.313762	-2.48341	0.0130131	0.0289014
HES1	15.0953	-0.778914	0.307171	-2.53577	0.01122	0.0252632
SYCP2	1263.46	-0.778668	0.0567915	-13.711	8.72589e-43	2.25338e-41
RNF207	8.37345	-0.778499	0.323192	-2.40878	0.016006	0.0348733
PTTG3P	11.0139	-0.776854	0.318324	-2.44045	0.0146691	0.0322234
DCAF16	659.019	-0.77658	0.0718695	-10.8054	3.24471e-27	5.07901e-26
HAUS1	760.565	-0.776403	0.0661573	-11.7357	8.36349e-32	1.56647e-30
C20orf26	17.7935	-0.776223	0.299412	-2.5925	0.00952824	0.0218403
CYP4F35P	25.8952	-0.775648	0.288598	-2.68765	0.00719574	0.0169443
PSAT1	3200.73	-0.775378	0.0392475	-19.7561	7.10809e-87	4.27404e-85
ABHD14B	384.557	-0.775031	0.0908298	-8.53279	1.42866e-17	1.42038e-16
ARSG	37.0289	-0.774272	0.250923	-3.08569	0.00203078	0.00533906
HOXC13	15.5264	-0.771989	0.305844	-2.52412	0.0115987	0.0260368
KIAA1598	406.003	-0.771886	0.0976285	-7.90636	2.65026e-15	2.30941e-14
DYNLL1-AS1	96.8664	-0.771772	0.171566	-4.4984	6.84666e-06	2.5994e-05
AC011747.7	8.03861	-0.770103	0.323325	-2.38182	0.0172272	0.0372303
NUDT6	18.1849	-0.769316	0.298096	-2.58077	0.00985803	0.0225107
DET1	63.8151	-0.76872	0.20067	-3.83077	0.000127744	0.000409601
RP11-356I2.4	35.424	-0.768478	0.249195	-3.08384	0.00204348	0.00536985
THNSL1	333.241	-0.768366	0.10121	-7.59182	3.15431e-14	2.55465e-13
AGTRAP	242.175	-0.76832	0.115561	-6.64861	2.95866e-11	1.90861e-10
CYB5D2	121.976	-0.767507	0.154568	-4.96551	6.85219e-07	2.9391e-06
CXCL9	3.07304	-0.767376	0.283902	-2.70296	0.00687254	0.0162584
DCTPP1	1277.77	-0.766664	0.0527509	-14.5337	7.415e-48	2.1889e-46
LGMN	565.809	-0.766464	0.0760864	-10.0736	7.22837e-24	9.99883e-23
SGOL2	1236.21	-0.765269	0.0534041	-14.3298	1.42574e-46	4.09742e-45
LOC101928615	11.3742	-0.763159	0.317533	-2.4034	0.0162435	0.0353389
USP6	18.5942	-0.763102	0.296541	-2.57334	0.0100721	0.0229513
APPL2	440.816	-0.762769	0.0873571	-8.73163	2.51039e-18	2.58413e-17
MORF4L2-AS1	17.1552	-0.762685	0.308666	-2.47091	0.0134771	0.0298422
RAB12	494.78	-0.76264	0.0837282	-9.10852	8.35102e-20	9.25084e-19
CCDC78	484.923	-0.762205	0.0819986	-9.29534	1.46741e-20	1.70553e-19
PREX2	82.3242	-0.761778	0.18711	-4.07128	4.67564e-05	0.000158662
SCP2	1635.33	-0.760857	0.0473962	-16.0531	5.43595e-58	2.07931e-56
HDDC3	167.248	-0.76078	0.137865	-5.51831	3.42277e-08	1.69784e-07
PTGES3L	18.03	-0.760772	0.296732	-2.56384	0.0103522	0.0235206
PDGFA	771.07	-0.759411	0.0676148	-11.2314	2.85791e-29	4.85607e-28
UCK2	1572.24	-0.758847	0.0483806	-15.685	1.91708e-55	6.95742e-54
TPD52	2134.88	-0.758146	0.0421574	-17.9837	2.61469e-72	1.29503e-70
SNORD28	19.0489	-0.757723	0.298548	-2.53803	0.0111479	0.0251182
CECR5	929.832	-0.757157	0.0642116	-11.7916	4.31257e-32	8.15235e-31
FAM101B	2104.09	-0.75661	0.0460257	-16.4388	1.00818e-60	4.05637e-59
CNNM1	83.5223	-0.755683	0.183769	-4.11213	3.92022e-05	0.000134711
DCP2	2671.77	-0.754196	0.0380438	-19.8244	1.83375e-87	1.11496e-85
LINC00888	42.8299	-0.754055	0.236068	-3.19422	0.00140207	0.00380146
FCHO1	731.432	-0.753652	0.0703191	-10.7176	8.41556e-27	1.29982e-25
SLC17A9	4.67434	-0.7535	0.311991	-2.41513	0.0157294	0.0343213
RAB2B	865.711	-0.752238	0.0656325	-11.4614	2.0623e-30	3.64086e-29
CD69	19104	-0.751335	0.0218396	-34.4025	2.31615e-259	9.93202e-257
C1orf220	6.50809	-0.751125	0.321326	-2.33758	0.0194092	0.0414797
IL16	548.348	-0.75112	0.0774099	-9.70315	2.92326e-22	3.72145e-21
TRPM2	256.453	-0.751067	0.117486	-6.39282	1.62858e-10	9.86164e-10
F13A1	4.09459	-0.750137	0.298298	-2.51472	0.0119127	0.0266754
MAP3K14-AS1	87.1323	-0.749663	0.178833	-4.19198	2.76532e-05	9.70095e-05
BEGAIN	44.8188	-0.749309	0.231026	-3.2434	0.00118113	0.0032522
ALG9	730.173	-0.74835	0.0679831	-11.0079	3.50086e-28	5.72182e-27
THAP6	436.474	-0.748068	0.0872261	-8.5762	9.80552e-18	9.81455e-17
LINC00176	102.904	-0.747715	0.184204	-4.05916	4.92492e-05	0.000166509
DMWD	1025.2	-0.747687	0.058226	-12.8411	9.64507e-38	2.192e-36
FAM216A	320.26	-0.746898	0.100534	-7.42928	1.09189e-13	8.49273e-13
WASL	139.288	-0.74638	0.145389	-5.13368	2.84135e-07	1.27759e-06
TTBK1	22.6992	-0.745978	0.281447	-2.6505	0.00803717	0.0187201
GEMIN7	126.115	-0.745736	0.15315	-4.86933	1.11979e-06	4.67991e-06
ATG4C	209.706	-0.745466	0.12297	-6.06216	1.34302e-09	7.58302e-09
UBE2L6	1315.75	-0.744242	0.0550986	-13.5075	1.41321e-41	3.51577e-40
IKZF4	25.346	-0.744057	0.275015	-2.70551	0.00681988	0.0161597
GPR84	152.742	-0.74404	0.142866	-5.20797	1.90918e-07	8.75846e-07
NSF-2	19.1762	-0.741281	0.294393	-2.518	0.0118023	0.0264391
TBL1XR1	2402.78	-0.740577	0.0419361	-17.6597	8.57346e-70	4.06118e-68
SLC24A5	7.01291	-0.740559	0.321788	-2.30139	0.0213696	0.0452819
SLC25A46	2043.28	-0.740397	0.0430449	-17.2006	2.62927e-66	1.18027e-64
FAM126A	792.629	-0.740326	0.0649862	-11.3921	4.58078e-30	8.0176e-29
RAET1K	27.4235	-0.740063	0.26831	-2.75824	0.00581142	0.0139507
DCAF7	2669.08	-0.739771	0.037925	-19.5062	9.73268e-85	5.70482e-83
USP43	44.1396	-0.738721	0.231842	-3.18631	0.001441	0.00389729
TMEM63A	182.902	-0.738663	0.127997	-5.77095	7.88239e-09	4.16484e-08
OAS2	272.456	-0.738541	0.11388	-6.48527	8.85715e-11	5.494e-10
PCAT18	13.9224	-0.738132	0.311487	-2.36971	0.0178023	0.0383359
LCA5L	25.6536	-0.73809	0.273228	-2.70137	0.00690552	0.0163199
CKAP2L	915.596	-0.737862	0.0650513	-11.3428	8.05503e-30	1.40082e-28
ANGPTL2	45.0211	-0.737611	0.232481	-3.17277	0.0015099	0.00407143
RGS6	16.381	-0.736851	0.309324	-2.38214	0.0172126	0.0372086
PLCXD2	21.3605	-0.736832	0.289416	-2.54592	0.0108989	0.0246184
LOC102723434	17.3575	-0.736735	0.299751	-2.45782	0.0139783	0.0308472
STX17	1236.61	-0.735796	0.0550614	-13.3632	9.92216e-41	2.42401e-39
ZBTB25	195.778	-0.734744	0.125189	-5.86906	4.38262e-09	2.36238e-08
HEATR3	535.465	-0.733659	0.0777804	-9.43244	4.00645e-21	4.81808e-20
TMEM173	224.892	-0.733391	0.119484	-6.13796	8.35872e-10	4.80273e-09
PAG1	119.978	-0.733052	0.15524	-4.72204	2.3349e-06	9.36891e-06
DSCC1	996.73	-0.732215	0.0600876	-12.1858	3.7009e-34	7.40861e-33
LINS	619.011	-0.732023	0.0756126	-9.68123	3.62337e-22	4.57696e-21
HK2	772.269	-0.731284	0.0659779	-11.0838	1.50402e-28	2.47555e-27
PCYOX1	348.53	-0.731133	0.100983	-7.24018	4.48086e-13	3.33709e-12
TIRAP	98.8614	-0.730483	0.167783	-4.35372	1.33844e-05	4.9066e-05
MLX	1134.69	-0.730298	0.0562226	-12.9894	1.40507e-38	3.25222e-37
RAB3D	123.875	-0.729871	0.155677	-4.68836	2.75404e-06	1.0967e-05
KSR2	189.427	-0.728342	0.137164	-5.31	1.09623e-07	5.15527e-07
44080	313.893	-0.726105	0.101119	-7.18069	6.93608e-13	5.09114e-12
RWDD2B	327.432	-0.725962	0.0976137	-7.43709	1.02924e-13	8.04002e-13
KCNQ3	44.2773	-0.725754	0.233459	-3.10871	0.00187907	0.00497555
RMND5B	387.144	-0.725317	0.0920393	-7.88052	3.26022e-15	2.81981e-14
GIMAP7	356.455	-0.723351	0.101792	-7.10619	1.19291e-12	8.59347e-12
CECR6	167.915	-0.723265	0.135669	-5.33112	9.76111e-08	4.61303e-07
PLEKHA8P1	59.9321	-0.72309	0.208845	-3.46232	0.000535535	0.00156306
LINC00668	96.9505	-0.72271	0.172563	-4.18809	2.8131e-05	9.85583e-05
TMC6	1836.24	-0.722089	0.0477737	-15.1148	1.29389e-51	4.19998e-50
RANBP9	2727.67	-0.721065	0.0382155	-18.8684	2.07594e-79	1.12758e-77
PIF1	286.597	-0.72105	0.106414	-6.77592	1.23621e-11	8.22542e-11
LOC102723510	26.045	-0.720912	0.276085	-2.6112	0.00902262	0.0207925
NR1D1	292.984	-0.720765	0.108989	-6.6132	3.7611e-11	2.40059e-10
C14orf39	158.931	-0.719568	0.139068	-5.17423	2.28849e-07	1.04107e-06
IL21R	1070.65	-0.719461	0.0589659	-12.2013	3.05901e-34	6.13873e-33
PTPN6	4941.17	-0.719437	0.0341953	-21.039	2.88125e-98	2.19392e-96
FAM63B	315.06	-0.719405	0.102605	-7.01138	2.35974e-12	1.65527e-11
SAMD1	637.643	-0.71915	0.0735121	-9.78274	1.33541e-22	1.72566e-21
KCNMB3	7.55909	-0.719075	0.32334	-2.2239	0.0261551	0.0540447
MUC2-2	6.40446	-0.718936	0.320449	-2.24353	0.0248628	0.0517617
PNPO	433.457	-0.718471	0.0876552	-8.19655	2.47382e-16	2.29823e-15
FLT3LG	46.0119	-0.718256	0.23417	-3.06723	0.0021605	0.00565547
POP5	341.726	-0.718082	0.0976329	-7.35492	1.91042e-13	1.45878e-12
MIR142	120.699	-0.717997	0.158574	-4.52784	5.95894e-06	2.28097e-05
LINC01120	11.4475	-0.717992	0.317439	-2.26183	0.0237079	0.0496091
ELK3	251.851	-0.717926	0.116324	-6.17179	6.75197e-10	3.90708e-09
NBEAL2	2413.54	-0.717194	0.0422401	-16.979	1.17499e-64	5.14691e-63
DBH	137.789	-0.716354	0.150084	-4.77301	1.81495e-06	7.38072e-06
CBFB	5501.03	-0.716288	0.0364041	-19.676	3.46059e-86	2.07317e-84
BCL7A	1135.88	-0.71625	0.0563796	-12.7041	5.61435e-37	1.24981e-35
LOC100335030	11.5958	-0.715382	0.318582	-2.24552	0.0247349	0.0515416
USP22	4994.61	-0.715275	0.0351743	-20.3351	6.28492e-92	4.2672e-90
ABHD14A	72.7022	-0.714694	0.193405	-3.69532	0.000219608	0.000680454
LOC100499484	8.0227	-0.714435	0.323375	-2.20931	0.0271532	0.0559009
TNFSF8	294.662	-0.714417	0.103811	-6.88192	5.90498e-12	4.0277e-11
NAT8L	30.9275	-0.714364	0.258115	-2.76761	0.00564683	0.0135896
PLK1	1937.52	-0.714182	0.0451995	-15.8007	3.07883e-56	1.13506e-54
PRTFDC1	151.907	-0.71404	0.146057	-4.88876	1.01471e-06	4.25715e-06
MRPL37	3244.32	-0.713779	0.0375226	-19.0226	1.10766e-80	6.16018e-79
FBXO41	1155.98	-0.713712	0.0552764	-12.9117	3.86684e-38	8.82494e-37
ARHGAP25	132.383	-0.71356	0.149242	-4.78124	1.74216e-06	7.09533e-06
ACSF3	826.892	-0.713453	0.0672729	-10.6054	2.81371e-26	4.25714e-25
FGF9	96.7937	-0.713306	0.168467	-4.23411	2.29464e-05	8.15509e-05
WDR66	92.0946	-0.712882	0.175871	-4.05344	5.04697e-05	0.000170199
ARPC4	1217.06	-0.712735	0.0551225	-12.93	3.04714e-38	6.99341e-37
HNRNPC	14574.7	-0.712625	0.0254809	-27.9671	4.08707e-172	7.31854e-170
VCAM1	36.2745	-0.71245	0.252128	-2.82575	0.00471696	0.0115653
LOC100287896	17.5471	-0.712306	0.299137	-2.38121	0.0172561	0.0372731
B4GALT6	687.414	-0.712168	0.0696351	-10.2271	1.49875e-24	2.14041e-23
FAIM	54.9918	-0.711891	0.21775	-3.26931	0.0010781	0.00299284
FAM72C	41.9002	-0.711811	0.241581	-2.94647	0.00321419	0.00814798
EPHB4	76.5642	-0.711537	0.190778	-3.72967	0.000191734	0.000599603
SNAP23	841.629	-0.711287	0.0630558	-11.2803	1.6422e-29	2.81681e-28
IZUMO4	76.9007	-0.71122	0.186764	-3.80812	0.000140027	0.000446874
ZNF488	28.4686	-0.71121	0.268027	-2.6535	0.0079661	0.0185784
PPP1CC	4720.39	-0.711088	0.0391976	-18.1411	1.50937e-73	7.71011e-72
KIF18A	744.537	-0.710306	0.066765	-10.6389	1.96461e-26	2.99189e-25
SAMD9L	311.538	-0.709782	0.108185	-6.56081	5.35148e-11	3.38913e-10
TYW3	1388.4	-0.709307	0.0526473	-13.4728	2.2613e-41	5.59148e-40
DENND6A	603.372	-0.708152	0.0747034	-9.47951	2.55471e-21	3.10665e-20
SRBD1	190.342	-0.706406	0.127448	-5.54269	2.97854e-08	1.48744e-07
NLRP11	32.1474	-0.706252	0.26695	-2.64563	0.00815387	0.0189729
LOC101927722	5.36123	-0.706188	0.3166	-2.23053	0.025712	0.0532576
GAS2	283.283	-0.705751	0.107881	-6.54192	6.07342e-11	3.82849e-10
DDX58	376.615	-0.705272	0.0915715	-7.70187	1.34089e-14	1.11422e-13
LINC00623	28.0525	-0.704713	0.277483	-2.53966	0.0110961	0.0250085
CCND1	46.129	-0.70469	0.234923	-2.99966	0.00270278	0.00694886
GNPNAT1	2297.62	-0.704541	0.0404491	-17.418	6.02833e-68	2.77491e-66
BATF3	351.221	-0.703698	0.0989358	-7.11267	1.13822e-12	8.21043e-12
N4BP3	495.37	-0.703232	0.0858854	-8.18802	2.65549e-16	2.45719e-15
GRAP2	1085.58	-0.703101	0.0601635	-11.6865	1.49407e-31	2.74474e-30
DHCR24	2601.99	-0.70286	0.0422367	-16.641	3.51666e-62	1.45812e-60
AGFG2	210.369	-0.70212	0.121463	-5.78051	7.44738e-09	3.94266e-08
BET1	343.245	-0.701657	0.0991871	-7.07408	1.50448e-12	1.07666e-11
DNTT	178.301	-0.701591	0.137483	-5.10313	3.34082e-07	1.48943e-06
44085	2383.06	-0.701561	0.0409333	-17.1391	7.57742e-66	3.37361e-64
SCAMP1	530.042	-0.701006	0.0828818	-8.45791	2.72223e-17	2.66579e-16
PDGFB	7.87986	-0.700986	0.322264	-2.1752	0.0296154	0.0604892
HEATR2	1378.2	-0.700783	0.0547667	-12.7958	1.73106e-37	3.90147e-36
TBCEL	332.86	-0.700382	0.100726	-6.95332	3.56779e-12	2.46988e-11
CRYZ	1075.26	-0.700022	0.0599744	-11.672	1.77195e-31	3.24063e-30
FADS2	3126.13	-0.699098	0.042693	-16.375	2.88495e-60	1.15505e-58
GAMT	516.683	-0.698904	0.0845683	-8.26437	1.40439e-16	1.31823e-15
PEX3	534.492	-0.698537	0.0819559	-8.52333	1.55032e-17	1.53946e-16
NUDT13	59.0111	-0.698027	0.216103	-3.23008	0.00123758	0.00339272
SLC30A6	309.173	-0.69722	0.103123	-6.76105	1.36993e-11	9.07811e-11
RP11-134P9.3	16.9988	-0.697099	0.302038	-2.30798	0.0210001	0.0445568
MCF2L-AS1	25.7898	-0.697052	0.278334	-2.50437	0.0122669	0.0274159
NKG7	400.126	-0.696981	0.0959942	-7.26066	3.85216e-13	2.87808e-12
FRG1B	108.59	-0.696313	0.165308	-4.21221	2.52884e-05	8.93677e-05
CCDC58	627.011	-0.696023	0.072467	-9.60469	7.63891e-22	9.5238e-21
MAFG-AS1	84.8202	-0.69517	0.179582	-3.87104	0.000108373	0.000350244
LOC101928548	13.8494	-0.694765	0.309798	-2.24264	0.0249203	0.0518611
VAV1	2390.04	-0.693944	0.0411145	-16.8783	6.49453e-64	2.79969e-62
SNORD4B	4.38766	-0.693166	0.309568	-2.23914	0.0251469	0.052213
C11orf42	4.02005	-0.692998	0.303589	-2.28268	0.022449	0.0472802
KIF6	30.6312	-0.692936	0.260647	-2.65853	0.00784834	0.0183222
DKC1	3458.92	-0.692764	0.0343388	-20.1744	1.64444e-90	1.07615e-88
SELL	975.054	-0.691827	0.0633554	-10.9198	9.27084e-28	1.48543e-26
DIXDC1	347.001	-0.691616	0.0955092	-7.24135	4.44226e-13	3.30986e-12
LOC100507412	37.9291	-0.691034	0.246745	-2.8006	0.00510079	0.0124061
ERBB2IP	2901.33	-0.691026	0.0375035	-18.4256	8.18626e-76	4.34512e-74
LOC102724466	16.0902	-0.690963	0.306012	-2.25796	0.0239484	0.050037
BMP2K	1919.07	-0.690246	0.0463036	-14.907	2.96954e-50	9.3055e-49
LOC102724169	10.8509	-0.690054	0.31929	-2.16121	0.030679	0.0623102
ATIC	4291.66	-0.689912	0.0333424	-20.6917	4.11141e-95	2.97295e-93
ISOC1	989.576	-0.689501	0.0582336	-11.8403	2.41709e-32	4.612e-31
PSRC1	225.34	-0.68887	0.119898	-5.74545	9.16762e-09	4.81116e-08
ANKRD31	18.7093	-0.688784	0.297559	-2.31478	0.0206251	0.0438526
KCNIP4	25.9269	-0.688751	0.27504	-2.50418	0.0122735	0.0274216
LTBP3	142.344	-0.687412	0.14649	-4.69256	2.69809e-06	1.076e-05
ELOVL4	429.63	-0.687291	0.0879383	-7.81561	5.46966e-15	4.64693e-14
SLC25A22	451.819	-0.687125	0.0893402	-7.6911	1.45871e-14	1.2072e-13
CLEC17A	3.87997	-0.687124	0.292871	-2.34617	0.0189677	0.0406522
DBP	34.274	-0.687004	0.260915	-2.63306	0.00846204	0.0196255
UGT3A2	391.988	-0.686384	0.0916432	-7.48974	6.90082e-14	5.45339e-13
CAB39L	62.6986	-0.68598	0.203906	-3.3642	0.000767671	0.00219037
ZNF33B	163.214	-0.685406	0.134839	-5.08314	3.71239e-07	1.64697e-06
NPAS4	7.87616	-0.685049	0.323332	-2.11871	0.0341148	0.0684269
RAB33A	41.2892	-0.68464	0.24079	-2.8433	0.00446484	0.0109918
FAM175A	351.08	-0.684585	0.0996081	-6.87279	6.29597e-12	4.2872e-11
TAF7L	14.7209	-0.684554	0.308691	-2.2176	0.0265822	0.0548439
RBFA	562.565	-0.684512	0.0763212	-8.96883	2.99679e-19	3.25551e-18
SOX4	2435.72	-0.684264	0.0428878	-15.9547	2.64089e-57	1.00311e-55
POLR3H	790.391	-0.683121	0.0659189	-10.3631	3.65124e-25	5.32173e-24
ZNF302	222.483	-0.683084	0.116655	-5.85558	4.75342e-09	2.55634e-08
TMEM52	49.3049	-0.682531	0.222438	-3.06842	0.00215196	0.00563585
SDCCAG3	583.411	-0.681998	0.0752113	-9.06775	1.21502e-19	1.34047e-18
E2F5	300.674	-0.681862	0.101932	-6.6894	2.24082e-11	1.46057e-10
TXN2	1176.24	-0.681227	0.0593068	-11.4865	1.54233e-30	2.7497e-29
CBX2	377.266	-0.68064	0.0938546	-7.25207	4.10451e-13	3.06381e-12
FAM72B	213.198	-0.680579	0.121885	-5.58376	2.35367e-08	1.18593e-07
TARBP1	1030.01	-0.680522	0.0573763	-11.8607	1.89408e-32	3.62254e-31
ARHGEF6	2686.05	-0.680106	0.0377493	-18.0164	1.44908e-72	7.22105e-71
POLK	939.502	-0.680066	0.06052	-11.2371	2.68174e-29	4.56148e-28
LOC101927989	14.6179	-0.679865	0.308617	-2.20295	0.0275986	0.056704
LOC102723521	625.761	-0.679727	0.0755435	-8.99782	2.30238e-19	2.50952e-18
MGC27345	302.106	-0.679544	0.104481	-6.50401	7.82058e-11	4.87328e-10
KIAA1107	63.4036	-0.679538	0.204519	-3.32261	0.000891781	0.00252547
CENPP	133.472	-0.679269	0.148858	-4.5632	5.03795e-06	1.9435e-05
PPIE	717.942	-0.679062	0.0677628	-10.0212	1.23053e-23	1.68358e-22
KIF2A	1835.66	-0.678699	0.0506959	-13.3877	7.14018e-41	1.75225e-39
MYEOV	10.447	-0.678223	0.321464	-2.10979	0.0348762	0.0697285
CORO1B	741.773	-0.677632	0.068491	-9.89375	4.43131e-23	5.88494e-22
SENP3	258.97	-0.67652	0.108869	-6.2141	5.16201e-10	3.01703e-09
NPPA-AS1	13.0829	-0.67633	0.316364	-2.13782	0.0325313	0.065655
C16orf59	362.885	-0.676214	0.0949719	-7.12014	1.07815e-12	7.79784e-12
QSER1	1968.94	-0.675106	0.0428343	-15.7609	5.78259e-56	2.11747e-54
POC5	552.091	-0.674471	0.0791361	-8.52292	1.55575e-17	1.54391e-16
AKTIP	168.626	-0.673916	0.140398	-4.80005	1.58625e-06	6.48632e-06
SMC1B	507.537	-0.673856	0.0818459	-8.23322	1.82243e-16	1.70181e-15
SLC46A3	158.426	-0.673038	0.143144	-4.70182	2.57857e-06	1.02959e-05
MPV17L2	287.397	-0.673017	0.108182	-6.22113	4.93599e-10	2.89012e-09
ANKRD7	18.5592	-0.672893	0.299539	-2.24643	0.0246766	0.0514398
KATNB1	834.709	-0.67221	0.0637122	-10.5507	5.04016e-26	7.5556e-25
UBE2J1	1604.63	-0.67168	0.0479305	-14.0136	1.28683e-44	3.51827e-43
SLC35B4	526.532	-0.671552	0.0778955	-8.62119	6.62626e-18	6.67748e-17
BMP4	413.698	-0.671188	0.0877646	-7.64759	2.04773e-14	1.67341e-13
SMTNL1	7.39809	-0.670915	0.322841	-2.07816	0.0376946	0.0746579
ZNF711	410.055	-0.670892	0.093056	-7.20955	5.6139e-13	4.14869e-12
CCDC61	95.9369	-0.669909	0.175433	-3.81861	0.000134208	0.000429143
LOC101927897	18.4401	-0.669284	0.298285	-2.24377	0.0248469	0.0517373
GMCL1	780.607	-0.668757	0.0670645	-9.97184	2.02434e-23	2.73748e-22
GCSAML	180.619	-0.668406	0.128676	-5.19448	2.0529e-07	9.3808e-07
HEY2	57.2631	-0.667779	0.222552	-3.00055	0.00269491	0.0069308
NRAS	3377.1	-0.66727	0.0354521	-18.8217	5.01163e-79	2.71311e-77
ALDH9A1	1950.45	-0.667155	0.0451966	-14.7612	2.60641e-49	7.99838e-48
EFCAB4B	448.809	-0.66711	0.085237	-7.82653	5.01537e-15	4.26765e-14
LOC101927018	13.6042	-0.666845	0.310899	-2.14489	0.0319616	0.0646574
LSM4	1947.43	-0.66679	0.0439996	-15.1544	7.08165e-52	2.32652e-50
RAB26	7.3073	-0.666762	0.32299	-2.06435	0.0389849	0.0769253
BTN3A1	215.737	-0.666716	0.118374	-5.63229	1.77834e-08	9.06704e-08
NEXN	404.926	-0.665948	0.0981674	-6.7838	1.17055e-11	7.80125e-11
BORA	762.642	-0.665782	0.0701534	-9.49036	2.30229e-21	2.80596e-20
ZBTB47	53.9722	-0.66563	0.223932	-2.97246	0.00295419	0.00754051
GBP3	655.375	-0.665416	0.0714679	-9.3107	1.26994e-20	1.48554e-19
USP2-AS1	26.6841	-0.665344	0.278742	-2.38695	0.0169887	0.0367637
SLC27A5	108.688	-0.665238	0.161563	-4.11751	3.82995e-05	0.000131831
HOXD8	47.2707	-0.665091	0.227712	-2.92076	0.00349183	0.00879705
FAM217B	693.002	-0.66489	0.0694616	-9.57205	1.04808e-21	1.29677e-20
GDF11	504.575	-0.664654	0.080943	-8.21139	2.1865e-16	2.03362e-15
AMPD2	1180.92	-0.664439	0.0555413	-11.963	5.55401e-33	1.0787e-31
ZNF681	129.781	-0.663543	0.149309	-4.44409	8.82666e-06	3.30797e-05
RP11-98I9.4	31.4915	-0.663011	0.259675	-2.55324	0.0106726	0.0241744
CHKB-AS1	10.1884	-0.662877	0.32022	-2.07007	0.0384462	0.0759738
HHIP	534.649	-0.662875	0.0787713	-8.41517	3.92312e-17	3.7939e-16
RCC2	8353.77	-0.662715	0.0320717	-20.6636	7.37195e-95	5.24567e-93
FAM173A	314.263	-0.662558	0.10118	-6.54828	5.82027e-11	3.67317e-10
43891	101.856	-0.662493	0.168017	-3.94301	8.04653e-05	0.000264778
PIP4K2A	2295.66	-0.662416	0.0442548	-14.9682	1.18441e-50	3.76217e-49
ZNF391	130.347	-0.662403	0.151818	-4.36314	1.28206e-05	4.71372e-05
SNORD88A	5.56627	-0.661359	0.317992	-2.0798	0.0375438	0.0744071
PSPH	371.857	-0.660918	0.0939798	-7.03255	2.02788e-12	1.43297e-11
DBIL5P	25.0677	-0.660709	0.27559	-2.39744	0.0165102	0.0358568
CAMKK1	96.818	-0.66011	0.180776	-3.65154	0.000260678	0.000798748
EPM2A	144.054	-0.658041	0.144101	-4.56652	4.95892e-06	1.91528e-05
RP11-521B24.3	56.7881	-0.657968	0.212376	-3.09813	0.00194749	0.00514
SGMS1	188.994	-0.657892	0.127907	-5.14351	2.69656e-07	1.21685e-06
SIM2	5.15352	-0.657578	0.314534	-2.09064	0.0365603	0.0726789
KIAA1671	26.3216	-0.657384	0.274348	-2.39617	0.0165674	0.0359619
ANKRD39	208.37	-0.657341	0.125186	-5.25092	1.51342e-07	7.00402e-07
YAF2	393.077	-0.657339	0.0912002	-7.20764	5.69294e-13	4.20519e-12
ADCK1	81.309	-0.657329	0.183513	-3.58192	0.000341078	0.00102449
CD72	147.918	-0.656518	0.146386	-4.48484	7.297e-06	2.75689e-05
GIMAP8	19.0243	-0.656401	0.292584	-2.24346	0.0248672	0.0517644
PCDH12	161.793	-0.655856	0.138235	-4.74449	2.09036e-06	8.43963e-06
MIR1304	16.4734	-0.655276	0.301623	-2.1725	0.0298183	0.0608285
EBAG9	587.542	-0.655109	0.0741012	-8.84073	9.50921e-19	1.00423e-17
MBNL1	5683.34	-0.654977	0.0337634	-19.399	7.86137e-84	4.55875e-82
IMPA1	1188.77	-0.654877	0.0550838	-11.8887	1.35435e-32	2.60249e-31
TMEM64	690.341	-0.654565	0.0751746	-8.70727	3.11272e-18	3.19005e-17
SCARB1	482.101	-0.654531	0.0839505	-7.79663	6.35834e-15	5.38238e-14
TMCO6	181.87	-0.654216	0.131365	-4.98012	6.35435e-07	2.73492e-06
TLR9	26.6634	-0.654096	0.272927	-2.3966	0.016548	0.0359246
G2E3	1073.77	-0.653882	0.0569438	-11.4829	1.60718e-30	2.85907e-29
INTS4	747.465	-0.653363	0.0683578	-9.55798	1.20072e-21	1.48001e-20
PRADC1	339.586	-0.652928	0.106978	-6.10339	1.03842e-09	5.91644e-09
MYOM2	12.2952	-0.65247	0.316111	-2.06405	0.0390125	0.0769398
HOXC11	22.1352	-0.652304	0.288862	-2.25818	0.0239342	0.0500138
GHRLOS	74.3392	-0.651715	0.191791	-3.39805	0.000678684	0.00195116
ZNF815P	8.02846	-0.650882	0.323358	-2.01288	0.0441268	0.0856926
PRKAR1B	585.588	-0.650864	0.077362	-8.41322	3.98895e-17	3.85299e-16
SNORD110	43.451	-0.650626	0.230976	-2.81685	0.00484968	0.0118621
SSR1	3081.11	-0.650476	0.036407	-17.8668	2.13945e-71	1.04067e-69
NDFIP2	1296.39	-0.650149	0.0584015	-11.1324	8.72571e-29	1.45682e-27
CDK13	1084.4	-0.649828	0.0591262	-10.9905	4.24507e-28	6.90354e-27
ZNF714	630.787	-0.649639	0.0716092	-9.072	1.16849e-19	1.29088e-18
PTP4A2	6535.41	-0.649593	0.028884	-22.4897	5.23095e-112	4.65783e-110
RGS14	303.992	-0.649482	0.101092	-6.42468	1.3215e-10	8.05905e-10
SSH3	67.1865	-0.649387	0.200867	-3.23292	0.0012253	0.00336189
TRAF4	7934.8	-0.64894	0.0293137	-22.1377	1.36919e-108	1.18675e-106
HNRNPUL2	865.987	-0.648894	0.0635117	-10.2169	1.66534e-24	2.37624e-23
ARID5B	492.706	-0.648848	0.0824993	-7.8649	3.69399e-15	3.17644e-14
ALDH3B2	5.53891	-0.648703	0.317228	-2.04491	0.040864	0.0801009
ZNF276	757.486	-0.6486	0.0707397	-9.16883	4.78181e-20	5.37376e-19
BTN3A3	66.7971	-0.648589	0.202291	-3.20622	0.0013449	0.00365862
VANGL1	1142.03	-0.64799	0.0609862	-10.6252	2.27568e-26	3.45273e-25
LRRC34	100.263	-0.647867	0.167306	-3.87234	0.000107797	0.00034859
LOC102724748	23.1347	-0.646943	0.279809	-2.31209	0.020773	0.044144
ADCY10P1	67.9095	-0.646911	0.196835	-3.28656	0.0010142	0.00283229
PRF1	18.6432	-0.646765	0.298125	-2.16944	0.0300491	0.0612446
SNX20	84.6843	-0.646487	0.183127	-3.53026	0.000415152	0.00123312
B3GNT1	115.069	-0.646177	0.158086	-4.0875	4.36046e-05	0.000148741
RFC5	1790.55	-0.646143	0.0471404	-13.7068	9.24559e-43	2.38381e-41
PARP11	530.497	-0.646133	0.083475	-7.74043	9.90782e-15	8.29214e-14
LOC100288842	22.5271	-0.64612	0.28978	-2.22969	0.0257681	0.0533601
PORCN	103.579	-0.646009	0.16645	-3.88109	0.00010399	0.000336948
RSL1D1	5207.61	-0.645066	0.0349446	-18.4597	4.35994e-76	2.32174e-74
EEF1E1	384.188	-0.644714	0.0931231	-6.92325	4.41405e-12	3.03233e-11
GLYCTK	222.669	-0.644361	0.116831	-5.51533	3.48127e-08	1.72633e-07
DIS3L	746.954	-0.644304	0.0674473	-9.5527	1.26357e-21	1.55278e-20
GABRB2	75.8566	-0.64309	0.191009	-3.3668	0.000760469	0.00217096
LOC101927278	2.87666	-0.643016	0.284918	-2.25684	0.0240179	0.0501695
BCL6B	26.8898	-0.64262	0.270447	-2.37614	0.0174949	0.037734
ZNF573	33.9906	-0.641911	0.249754	-2.57017	0.0101647	0.0231365
TTC27	831.33	-0.640841	0.0682693	-9.38695	6.17606e-21	7.3459e-20
AGAP2	832.391	-0.640639	0.0650328	-9.85101	6.78565e-23	8.90993e-22
LRG1	8.36575	-0.640548	0.323186	-1.98198	0.0474814	0.0914983
RNASE4	31.4681	-0.640224	0.258117	-2.48037	0.0131247	0.0291253
LRRIQ4	6.74622	-0.639505	0.322101	-1.98542	0.0470982	0.0908136
TRIM46	72.6411	-0.639276	0.192902	-3.31399	0.000919753	0.00259522
RPL7L1	3131.61	-0.639045	0.0364157	-17.5486	6.09684e-69	2.84665e-67
SCN3A	85.5696	-0.638833	0.17773	-3.59441	0.000325129	0.000981107
LSS	223.885	-0.638758	0.117813	-5.42181	5.89991e-08	2.86299e-07
LMO3	2.52733	-0.638127	0.271305	-2.35207	0.0186695	0.040053
MRPL48	305.411	-0.63692	0.101564	-6.27113	3.58445e-10	2.11933e-09
PCDH18	23.1332	-0.636851	0.285116	-2.23366	0.0255057	0.052884
KNOP1	191.969	-0.636664	0.125915	-5.05629	4.27494e-07	1.88474e-06
GATSL2	100.226	-0.636425	0.168306	-3.78137	0.000155968	0.000493714
THOC3	361.783	-0.63629	0.0933098	-6.81912	9.16026e-12	6.15786e-11
SLC45A3	158.804	-0.636284	0.140986	-4.51309	6.38899e-06	2.43529e-05
SNORD49A	18.0776	-0.635923	0.297748	-2.13578	0.0326976	0.065917
PIM2	457.01	-0.635337	0.0913113	-6.95792	3.45342e-12	2.3936e-11
TK2	238.4	-0.63517	0.11322	-5.61007	2.02246e-08	1.02666e-07
INTS2	745.121	-0.634425	0.0682285	-9.29854	1.42391e-20	1.65734e-19
OARD1	263.612	-0.63417	0.112622	-5.63094	1.79226e-08	9.13222e-08
PANDAR	7.83487	-0.633197	0.323336	-1.95833	0.0501917	0.0960058
C21orf59	1443.68	-0.633195	0.0525252	-12.0551	1.82383e-33	3.60234e-32
PFN2	178.743	-0.6328	0.131724	-4.80397	1.55553e-06	6.3687e-06
FAS	1969.48	-0.632303	0.044856	-14.0963	4.0031e-45	1.11315e-43
SLC9A3R1	1497.54	-0.631117	0.0522457	-12.0798	1.35091e-33	2.68125e-32
RGS18	117.204	-0.630408	0.157984	-3.99034	6.59794e-05	0.000219326
JAG2	193.135	-0.630038	0.124584	-5.05716	4.25556e-07	1.87671e-06
TRMT11	197.944	-0.629742	0.126808	-4.96609	6.83158e-07	2.93103e-06
KIAA1377	97.3091	-0.628945	0.176776	-3.55787	0.000373879	0.00111828
LRRC19	5.33998	-0.628481	0.31747	-1.97965	0.0477423	0.091925
TAF7	3531.58	-0.628391	0.0365982	-17.17	4.45327e-66	1.99357e-64
MANEAL	202.348	-0.62802	0.126316	-4.97181	6.6331e-07	2.84888e-06
TTLL12	1557.66	-0.627957	0.0482099	-13.0255	8.7658e-39	2.04347e-37
SMPD3	27.6395	-0.627714	0.273407	-2.29589	0.021682	0.0458604
SPINK2	88.091	-0.627397	0.180562	-3.47468	0.000511462	0.00149736
RAD51AP1	814.723	-0.627251	0.0645646	-9.71508	2.60037e-22	3.32598e-21
XYLB	207.144	-0.627185	0.125143	-5.01175	5.39364e-07	2.34622e-06
TMPRSS13	76.4767	-0.627079	0.189327	-3.31216	0.000925796	0.0026082
NRIP2	34.9123	-0.627005	0.264323	-2.37212	0.0176866	0.038112
MTMR8	94.7223	-0.62672	0.17029	-3.68031	0.000232952	0.000718521
ALDOC	163.677	-0.625726	0.140033	-4.4684	7.88063e-06	2.96776e-05
ST3GAL4	444.923	-0.625501	0.0902536	-6.93048	4.1941e-12	2.88976e-11
LOC100129461	33.311	-0.625484	0.252248	-2.47964	0.0131517	0.0291772
GTF2I	346.33	-0.624373	0.0958388	-6.51482	7.27765e-11	4.55063e-10
TRNE	416.549	-0.623961	0.0940748	-6.6326	3.29819e-11	2.11674e-10
MUM1	399.087	-0.623817	0.0956738	-6.52025	7.01918e-11	4.39069e-10
MDM2	2085.55	-0.623694	0.0435916	-14.3076	1.96038e-46	5.61412e-45
ARV1	193.454	-0.623195	0.124377	-5.01052	5.4284e-07	2.36008e-06
GMPR2	1226.33	-0.6231	0.0530906	-11.7365	8.28147e-32	1.55289e-30
LPIN2	1712.58	-0.621619	0.0456912	-13.6048	3.74985e-42	9.53257e-41
DMXL2	910.365	-0.621401	0.063969	-9.7141	2.62566e-22	3.3557e-21
HAR1A	52.0842	-0.621043	0.217636	-2.85358	0.00432292	0.0106827
GIMAP6	365.178	-0.620967	0.0944639	-6.57359	4.91152e-11	3.11777e-10
TRERF1	154.068	-0.620653	0.146971	-4.22296	2.41113e-05	8.54302e-05
PXMP4	54.555	-0.620647	0.21622	-2.87044	0.00409905	0.0101696
CHRAC1	1269.22	-0.619908	0.0541553	-11.4469	2.43834e-30	4.28617e-29
IRAK1BP1	130.672	-0.619825	0.150443	-4.11999	3.78882e-05	0.000130526
EIF2B1	1855.51	-0.619808	0.0443915	-13.9623	2.64744e-44	7.0954e-43
EAF2	204.187	-0.619703	0.127295	-4.86824	1.12597e-06	4.7025e-06
PIK3R1	1843.97	-0.619303	0.0451343	-13.7213	7.56601e-43	1.96007e-41
RP1-234P15.4	7.02338	-0.619192	0.322675	-1.91893	0.0549929	0.103788
GTPBP10	695.463	-0.619145	0.069036	-8.96843	3.00769e-19	3.26517e-18
C7orf50	628.853	-0.618942	0.074166	-8.34536	7.09989e-17	6.79347e-16
ARNT2	73.4214	-0.618776	0.19517	-3.17044	0.00152207	0.00409884
MFSD3	48.6645	-0.617848	0.22377	-2.76108	0.00576097	0.0138398
GJA3	190.875	-0.617472	0.131029	-4.71248	2.44717e-06	9.8025e-06
TEX264	526.677	-0.61735	0.0873935	-7.06403	1.61742e-12	1.15292e-11
ZBTB1	1679.9	-0.616149	0.0470091	-13.107	3.00147e-39	7.078e-38
LOC100505504	17.8368	-0.615947	0.298792	-2.06146	0.0392591	0.0773458
THAP8	50.1997	-0.614624	0.21891	-2.80765	0.00499045	0.0121717
ZNF846	43.3745	-0.614469	0.241139	-2.5482	0.0108281	0.0244688
PLCG1	2500.58	-0.614178	0.0394154	-15.5822	9.61845e-55	3.44467e-53
GRIN3A	14.843	-0.613707	0.306844	-2.00006	0.0454938	0.0881058
AVL9	1546.22	-0.613681	0.0494366	-12.4135	2.20743e-35	4.59976e-34
TRPC5OS	95.454	-0.613569	0.171849	-3.57039	0.000356455	0.00106891
MIR4269	2.35292	-0.61308	0.269252	-2.27697	0.0227877	0.0479131
KPNA4	3676.75	-0.61299	0.0340514	-18.0019	1.88289e-72	9.3542e-71
ZNF616	272.744	-0.612914	0.119285	-5.13824	2.77327e-07	1.24766e-06
NUP35	703.006	-0.612689	0.0685929	-8.93225	4.17414e-19	4.46602e-18
TLR3	11.4732	-0.612156	0.317043	-1.93083	0.0535041	0.101331
ATP6V0B	1908.46	-0.611915	0.045078	-13.5746	5.6667e-42	1.43161e-40
CDC123	4917.21	-0.611896	0.0335278	-18.2504	2.05268e-74	1.06864e-72
PRR5	179.611	-0.611797	0.131366	-4.65719	3.20553e-06	1.26567e-05
FOXN2	543.249	-0.611525	0.0803387	-7.61183	2.70239e-14	2.19628e-13
VILL	476.217	-0.611341	0.0823459	-7.42406	1.13581e-13	8.82594e-13
RAP2C	1268.63	-0.611127	0.0523306	-11.6782	1.64761e-31	3.02e-30
CCDC163P	78.6685	-0.610857	0.184889	-3.30392	0.000953442	0.00268007
OGFOD2	407.066	-0.610339	0.0973798	-6.26762	3.66613e-10	2.16526e-09
MAP1A	1349.72	-0.610236	0.0563065	-10.8378	2.28001e-27	3.59438e-26
ABCB6	323.243	-0.609335	0.10186	-5.98211	2.20267e-09	1.21628e-08
ZFAND6	887.734	-0.609281	0.0652385	-9.33929	9.69833e-21	1.14269e-19
CCDC106	309.585	-0.609145	0.100108	-6.08489	1.16574e-09	6.62337e-09
THEM6	179.349	-0.609044	0.12826	-4.74852	2.04913e-06	8.27935e-06
KPTN	289.923	-0.608928	0.104857	-5.80724	6.35116e-09	3.37768e-08
NUDT22	387.338	-0.608481	0.0973059	-6.25328	4.01917e-10	2.36605e-09
GIT2	1950.44	-0.60846	0.0432509	-14.0681	5.96142e-45	1.65206e-43
EED	2088.5	-0.607816	0.0449637	-13.5179	1.22609e-41	3.0596e-40
IFI16	4344.85	-0.607711	0.033855	-17.9504	4.76659e-72	2.34657e-70
KIAA0753	510.227	-0.607361	0.0793585	-7.65339	1.95749e-14	1.60288e-13
EIF2S3	4129.75	-0.607181	0.0318222	-19.0804	3.67209e-81	2.06333e-79
LHFPL1	3.22467	-0.606937	0.29042	-2.08986	0.0366306	0.0727924
UBE2D4	189.054	-0.606696	0.129424	-4.68766	2.76349e-06	1.09939e-05
IQCK	248.407	-0.606342	0.120511	-5.03142	4.8685e-07	2.13087e-06
EYS	5.38506	-0.605816	0.315316	-1.9213	0.0546938	0.10332
EVPL	201.879	-0.605751	0.121619	-4.98073	6.33462e-07	2.72859e-06
NUDT12	5.63109	-0.605506	0.318967	-1.89833	0.0576525	0.108032
HSPD1	23512.8	-0.60532	0.0200264	-30.2261	1.07648e-200	2.65777e-198
DBH-AS1	236.506	-0.605199	0.116466	-5.19637	2.03222e-07	9.2923e-07
CMC4	131.093	-0.605057	0.148017	-4.08775	4.35569e-05	0.00014861
CCL13	3.19024	-0.604574	0.290268	-2.08281	0.0372685	0.0738976
ZNF512B	1677.44	-0.603506	0.0478137	-12.622	1.59688e-36	3.48343e-35
VMA21	1328.94	-0.603213	0.0519032	-11.6219	3.19051e-31	5.79591e-30
OTUD6B	1177.86	-0.603129	0.062192	-9.69785	3.07914e-22	3.91683e-21
ZNF273	352.611	-0.603107	0.0937756	-6.43138	1.2645e-10	7.72594e-10
NFU1	351.666	-0.603053	0.0984018	-6.12847	8.87262e-10	5.08903e-09
CENPQ	364.057	-0.603023	0.0971395	-6.20781	5.37293e-10	3.13469e-09
PFAS	1725.75	-0.602944	0.0453939	-13.2825	2.92541e-40	7.11487e-39
PKDREJ	11.8574	-0.602468	0.316541	-1.90328	0.0570036	0.106951
ZNF480	384.741	-0.602154	0.0919355	-6.54975	5.76343e-11	3.63871e-10
LOC100506022	5.20218	-0.601807	0.316951	-1.89874	0.0575988	0.107966
MINA	517.249	-0.601718	0.0834167	-7.2134	5.45722e-13	4.04206e-12
PTCD2	186.648	-0.601645	0.127202	-4.72984	2.24699e-06	9.03622e-06
BRCA2	1497.7	-0.60162	0.04927	-12.2107	2.72652e-34	5.48502e-33
AGBL1	4.00798	-0.601585	0.304039	-1.97864	0.0478565	0.0920904
THEM5	5.99774	-0.601128	0.320918	-1.87315	0.0610476	0.113403
DTX4	30.0595	-0.601037	0.262744	-2.28754	0.0221641	0.0467527
AC009948.5	126.857	-0.60086	0.153636	-3.91093	9.19432e-05	0.000300665
COPS7B	1925.49	-0.600726	0.044294	-13.5623	6.70463e-42	1.68859e-40
TMEM30A	3243.54	-0.600451	0.0429122	-13.9926	1.73073e-44	4.70821e-43
GSTO1	2269.94	-0.600369	0.0410814	-14.6141	2.28214e-48	6.84851e-47
NPAT	1141.08	-0.598983	0.0561862	-10.6607	1.55462e-26	2.38312e-25
RIMBP2	4.58297	-0.598969	0.306922	-1.95154	0.0509932	0.0972763
ITGB2	6575.16	-0.59881	0.0300685	-19.9149	3.0238e-88	1.89511e-86
POLE2	664.54	-0.598792	0.0719073	-8.32728	8.27196e-17	7.8762e-16
FAM72A	141.785	-0.598314	0.143884	-4.15832	3.20597e-05	0.000111365
PGPEP1	233.988	-0.59818	0.115806	-5.16536	2.39976e-07	1.08864e-06
LOC100272217	10.1989	-0.597928	0.320738	-1.86422	0.0622901	0.115461
GRPEL1	1710.32	-0.597544	0.0470346	-12.7043	5.5936e-37	1.24689e-35
PHB2	2944.55	-0.597424	0.0370551	-16.1226	1.77109e-58	6.83883e-57
DLX4	132.233	-0.596287	0.149893	-3.97809	6.94715e-05	0.000230183
TMX3	1145.65	-0.595816	0.0584014	-10.2021	1.9406e-24	2.75934e-23
NDUFAF4	1313.6	-0.595283	0.0536326	-11.0993	1.26453e-28	2.0898e-27
RARG	390.135	-0.59522	0.0921868	-6.45667	1.07029e-10	6.56886e-10
PRKCQ	535.734	-0.595174	0.0796211	-7.47507	7.71623e-14	6.08008e-13
LOC339862	5.75869	-0.595087	0.317356	-1.87514	0.0607732	0.112971
FRA10AC1	562.032	-0.595047	0.0782224	-7.60711	2.80285e-14	2.27452e-13
MCM3AP-AS1	34.4018	-0.594796	0.249174	-2.38707	0.0169832	0.0367566
FANCF	416.027	-0.594164	0.0904311	-6.57035	5.0196e-11	3.18266e-10
LRIT3	13.7958	-0.594065	0.30974	-1.91795	0.0551172	0.104008
SLC39A9	2520.58	-0.594006	0.0407595	-14.5734	4.14422e-48	1.2323e-46
LOC101929038	5.172	-0.593473	0.316334	-1.8761	0.0606419	0.112826
QDPR	375.273	-0.592837	0.0949758	-6.24198	4.3207e-10	2.5344e-09
SSSCA1	582.34	-0.592179	0.0787341	-7.52126	5.42523e-14	4.32717e-13
LYRM4	509.962	-0.591979	0.0800838	-7.392	1.4464e-13	1.11123e-12
AMER1	153.033	-0.591664	0.142883	-4.14089	3.45957e-05	0.000119715
ZNF652	74.0192	-0.59163	0.197074	-3.00206	0.00268157	0.00690086
EHD2	17.5698	-0.591392	0.300653	-1.96702	0.0491805	0.0942708
RFX7	1127.61	-0.591357	0.0584491	-10.1175	4.62172e-24	6.45891e-23
LINC00997	110.142	-0.591181	0.163824	-3.60863	0.000307824	0.000932341
LINC00341	62.7592	-0.590944	0.203817	-2.89939	0.00373887	0.00935148
APEH	1423.76	-0.590941	0.0524976	-11.2565	2.15058e-29	3.66949e-28
HCG18-5	4.85676	-0.590382	0.311627	-1.89451	0.058157	0.10884
LNPEP	506.594	-0.59016	0.0803108	-7.34846	2.0051e-13	1.53035e-12
FAM27E2	4.31121	-0.590083	0.309222	-1.90828	0.0563545	0.105965
MITD1	588.894	-0.589563	0.0762326	-7.73374	1.04432e-14	8.72231e-14
ZNF563	40.0687	-0.589529	0.236857	-2.48897	0.0128114	0.0285077
KNSTRN	976.356	-0.58938	0.0616004	-9.56779	1.0922e-21	1.35033e-20
PTEN	1167.87	-0.588475	0.0539237	-10.9131	9.97805e-28	1.59561e-26
OGDHL	132.978	-0.588426	0.154536	-3.80769	0.000140273	0.000447484
AK4	11.772	-0.588001	0.317584	-1.85148	0.0640999	0.118291
GNRHR	6.95716	-0.587475	0.321614	-1.82664	0.0677535	0.124092
AMPD3	72.1623	-0.587449	0.192064	-3.05862	0.00222361	0.00580296
LIG4	1273.81	-0.586849	0.0546001	-10.7481	6.04789e-27	9.40366e-26
SERPINB9	32.6385	-0.586792	0.267893	-2.1904	0.0284953	0.0583917
SYT1	48.8016	-0.586563	0.224835	-2.60886	0.00908442	0.0209171
KIF14	1641.76	-0.58656	0.0471705	-12.4349	1.68967e-35	3.54353e-34
TXNDC9	532.37	-0.586368	0.0790232	-7.4202	1.1694e-13	9.06107e-13
SNORD22	37.6136	-0.586109	0.245032	-2.39197	0.0167582	0.0363083
LINC00426	19.5479	-0.585985	0.292097	-2.00613	0.0448421	0.0869573
LOC100506603	31.1575	-0.585832	0.264723	-2.213	0.0268977	0.0554317
LRRIQ1	61.5343	-0.585189	0.209079	-2.79889	0.00512782	0.0124657
SNAPC5	167.414	-0.585141	0.13391	-4.36966	1.2444e-05	4.58249e-05
INHBA	205.604	4.12835	0.18915	21.8258	1.31926e-105	1.09123e-103
AREG	868.846	3.52775	0.0885639	39.8328	0	0
ATP6V0A4	158.383	3.34095	0.182312	18.3255	5.17975e-75	2.71395e-73
PLA2G4D	112.437	2.95144	0.196839	14.9942	8.00779e-51	2.55356e-49
DSP	52.0573	2.91948	0.25909	11.2682	1.8837e-29	3.22426e-28
TMCC3	73.9967	2.90843	0.232043	12.534	4.86213e-36	1.03838e-34
DUSP6	4532.13	2.76586	0.0670775	41.2338	0	0
ROR2	89.2997	2.75086	0.215403	12.7708	2.38756e-37	5.35886e-36
NTNG2	167.914	2.74431	0.165314	16.6006	6.90071e-62	2.83242e-60
FOXA1	762.576	2.71586	0.0843414	32.2008	1.72104e-227	5.72333e-225
LOC101928841	37.18	2.68775	0.279593	9.61309	7.04007e-22	8.79739e-21
CDH1	18.9125	2.65835	0.317612	8.36981	5.77129e-17	5.54827e-16
ABTB2	505.572	2.63686	0.0979922	26.9089	1.72721e-159	2.55863e-157
PRODH2	76.2841	2.56783	0.219142	11.7177	1.03496e-31	1.91644e-30
GEM	2512.93	2.53027	0.0470567	53.7706	0	0
AC002398.5	31.6004	2.52721	0.290632	8.69555	3.45139e-18	3.52383e-17
ST3GAL6	248.19	2.52617	0.131243	19.2481	1.46411e-82	8.31278e-81
GPC1	746.894	2.49712	0.078446	31.8323	2.31501e-222	7.25445e-220
NT5E	532.023	2.41328	0.0906389	26.6253	3.46202e-156	5.03692e-154
MGLL	1563.66	2.40704	0.057318	41.9945	0	0
ROCK1P1	237.763	2.40327	0.132327	18.1616	1.03937e-73	5.34275e-72
MMP13	102.554	2.40104	0.191363	12.547	4.12757e-36	8.86151e-35
KIAA1199	119.913	2.3975	0.176903	13.5527	7.63922e-42	1.91804e-40
SLC7A8	126.057	2.39161	0.175857	13.5997	4.02116e-42	1.01905e-40
FOSL2	2617.98	2.39052	0.0462587	51.6772	0	0
RGS2	984.973	2.38758	0.0760933	31.3771	4.16051e-216	1.18939e-213
GADD45A	4159.37	2.38514	0.0365462	65.2636	0	0
GLIPR1	1674.58	2.36083	0.0538688	43.8255	0	0
TUBB3	437.893	2.35332	0.100447	23.4286	2.18738e-121	2.17338e-119
CSF1	3769.97	2.35133	0.0402009	58.4896	0	0
HIST1H4C	32.127	2.3279	0.288501	8.06896	7.09011e-16	6.39012e-15
LRRC37A3	112.223	2.3221	0.183704	12.6405	1.26292e-36	2.75861e-35
ATP2B2	168.621	2.31912	0.155487	14.9152	2.62339e-50	8.25254e-49
TMEM59L	80.5882	2.31287	0.211632	10.9287	8.40261e-28	1.35297e-26
RAB3B	168.033	2.2922	0.15157	15.1231	1.14033e-51	3.71632e-50
ATP1B1	252.7	2.2785	0.138065	16.5031	3.48275e-61	1.41525e-59
RP13-895J2.7	375.654	2.26602	0.108483	20.8882	6.85111e-97	5.09766e-95
BHLHE41	17.5463	2.25935	0.315073	7.17087	7.45221e-13	5.4577e-12
ARC	2596.11	2.23689	0.0950525	23.5332	1.86426e-122	1.93491e-120
ST3GAL6-AS1	64.7921	2.21257	0.222728	9.93396	2.96252e-23	3.96667e-22
IL24	52.992	2.19689	0.251373	8.73956	2.34018e-18	2.42116e-17
MALAT1	11410	2.19686	0.110653	19.8536	1.02522e-87	6.30412e-86
SH3RF2	206.938	2.1814	0.217753	10.0178	1.27333e-23	1.74068e-22
TM4SF1	63.4493	2.17981	0.245522	8.87825	6.79218e-19	7.22917e-18
GZMB	3405.74	2.17432	0.0467657	46.4939	0	0
ELOVL7	53.2465	2.15294	0.244307	8.81244	1.22454e-18	1.28403e-17
ENPP1	1709.68	2.10874	0.0573604	36.763	7.21743e-296	4.35585e-293
MFI2	710.384	2.10387	0.078131	26.9274	1.04845e-159	1.56739e-157
FOSB	213.535	2.0944	0.144636	14.4805	1.60876e-47	4.72336e-46
ADM	46.6228	2.08921	0.246791	8.4655	2.55056e-17	2.50068e-16
AUTS2	771.929	2.08586	0.0763907	27.3051	3.68483e-164	5.82955e-162
IL23A	3793.74	2.08495	0.0729901	28.5649	1.83419e-179	3.47537e-177
DNAH17	413.593	2.08203	0.102497	20.3131	9.85568e-92	6.63629e-90
WNT9A	66.1897	2.07435	0.217108	9.55446	1.24229e-21	1.52894e-20
FOSL1	251.382	2.06795	0.127855	16.1741	7.67558e-59	2.99219e-57
SPTBN5	62.2176	2.06527	0.225942	9.14069	6.20547e-20	6.94016e-19
CREB5	129.531	2.04826	0.167457	12.2315	2.10892e-34	4.26058e-33
KLF5	169.031	2.04232	0.151276	13.5006	1.55094e-41	3.84667e-40
ECM1	87.1672	1.99858	0.19645	10.1735	2.60485e-24	3.67181e-23
SYP	368.212	1.9938	0.104951	18.9974	1.79334e-80	9.93963e-79
LOC101929728	14.3204	1.98397	0.319387	6.2118	5.23803e-10	3.06022e-09
CLU	47.5764	1.98125	0.242826	8.15912	3.37481e-16	3.11043e-15
LINC01125	200.059	1.96514	0.140717	13.9652	2.54148e-44	6.82264e-43
LTK	37.6993	1.95635	0.259679	7.53371	4.93178e-14	3.94324e-13
NUP210L	16.2646	1.94552	0.314366	6.18869	6.06662e-10	3.52678e-09
NPHS1	382.486	1.93794	0.10743	18.0391	9.60508e-73	4.81584e-71
GPRC5C	36.8285	1.9332	0.270381	7.14992	8.68315e-13	6.33124e-12
SLC35E4	653.047	1.92063	0.0812711	23.6324	1.79172e-123	1.87154e-121
TUFT1	457.28	1.91725	0.0931214	20.5888	3.46172e-94	2.45255e-92
LUCAT1	265.068	1.91293	0.11871	16.1144	2.02273e-58	7.79206e-57
KLF6	1693.47	1.9096	0.0545806	34.9869	3.56408e-268	1.61324e-265
LRP2	134.961	1.90463	0.16238	11.7294	9.00419e-32	1.67876e-30
HIST1H1D	23.3578	1.90417	0.302895	6.28658	3.24538e-10	1.92513e-09
C10orf55	89.6477	1.87953	0.189688	9.90849	3.82368e-23	5.09044e-22
CPA4	45.2414	1.87895	0.247261	7.59906	2.98295e-14	2.41827e-13
LINC00963	96.075	1.87071	0.190504	9.81975	9.2574e-23	1.21164e-21
TSHZ3	883.556	1.8678	0.0709916	26.3102	1.46755e-152	2.0439e-150
TUBB2A	2545.15	1.85098	0.0486631	38.0367	0	0
CCND2	372.291	1.84465	0.11658	15.8231	2.15639e-56	7.96788e-55
GALNT9-2	160.19	1.83392	0.149934	12.2315	2.11003e-34	4.26058e-33
ZEB2	591.753	1.82953	0.0822699	22.2381	1.47041e-109	1.28819e-107
ITGA2	243.388	1.82814	0.23777	7.68866	1.4868e-14	1.22919e-13
ADCY4	135.217	1.82654	0.16362	11.1633	6.16551e-29	1.03574e-27
MMP10	3471.17	1.82373	0.126332	14.4361	3.06895e-47	8.93008e-46
ADAM19	1638.1	1.82243	0.0505954	36.0197	4.10576e-284	2.15817e-281
ATP8B4	77.0001	1.8207	0.20325	8.95793	3.3083e-19	3.57485e-18
OTOS	10.856	1.82068	0.323061	5.63572	1.74327e-08	8.89653e-08
MMRN2	86.1988	1.81525	0.197829	9.17587	4.47961e-20	5.05858e-19
IL22	35.5606	1.80294	0.26786	6.73091	1.68609e-11	1.10965e-10
SLC9A2	35.886	1.8026	0.263199	6.84879	7.44776e-12	5.03992e-11
MAMLD1	258.013	1.79477	0.119148	15.0633	2.8238e-51	9.07571e-50
ISG20	188.6	1.79045	0.144393	12.3999	2.61765e-35	5.44065e-34
COL7A1	317.731	1.78674	0.107318	16.6491	3.0733e-62	1.27753e-60
RELN	45.9463	1.77655	0.244547	7.26465	3.74016e-13	2.79732e-12
TMEM151B	216.409	1.76716	0.127398	13.8712	9.46463e-44	2.51183e-42
PCSK5	63.9749	1.76217	0.219323	8.03458	9.39032e-16	8.40281e-15
TRIB1	319.712	1.76079	0.119067	14.7882	1.74448e-49	5.38376e-48
FAM131B	17.2741	1.75949	0.310598	5.66483	1.47173e-08	7.56047e-08
CDKN1A	9830.29	1.75046	0.0303761	57.626	0	0
HIST1H1E	18.7945	1.74645	0.307254	5.68405	1.31542e-08	6.79173e-08
ADAM11	116.965	1.74139	0.166132	10.482	1.04559e-25	1.55172e-24
GPR161	179.29	1.73806	0.139894	12.4242	1.93238e-35	4.04213e-34
PHLDA1	3686.72	1.72929	0.0363758	47.5395	0	0
TMEM74B	15.2933	1.72711	0.314767	5.48694	4.08962e-08	2.01391e-07
SV2C	25.6782	1.71348	0.288943	5.93017	3.02623e-09	1.65311e-08
CRTAM	5363.66	1.70359	0.0307416	55.4165	0	0
TAGLN3	36.8251	1.68912	0.263144	6.41897	1.37203e-10	8.35782e-10
PKD1L1	11.8478	1.6806	0.321491	5.22753	1.71792e-07	7.92119e-07
CREB3L1	40.4834	1.6777	0.251071	6.6822	2.35383e-11	1.53055e-10
MLC1	39.6153	1.67298	0.256232	6.52918	6.61326e-11	4.14793e-10
VCAN	16.118	1.66975	0.312597	5.34155	9.21555e-08	4.37551e-07
ZCCHC24	74.5952	1.65255	0.203601	8.1166	4.7943e-16	4.36198e-15
SPSB1	564.261	1.65174	0.144185	11.4557	2.20062e-30	3.88085e-29
ITGA1	327.572	1.65076	0.103916	15.8856	7.97841e-57	2.99558e-55
OTUD1	238.964	1.64782	0.12096	13.6229	2.9267e-42	7.45166e-41
EFNB2	52.5403	1.64646	0.228322	7.21116	5.54772e-13	4.1035e-12
RTN4RL2	932.869	1.63953	0.0658664	24.8917	9.14847e-137	1.12086e-134
DCBLD2	1359.42	1.63677	0.0573166	28.5566	2.32277e-179	4.35052e-177
LTBP1	184.426	1.63623	0.137037	11.94	7.31798e-33	1.41791e-31
LOC101927354	20.1224	1.63572	0.301702	5.42165	5.90527e-08	2.86473e-07
OLFML2B	9.68011	1.63571	0.323274	5.05983	4.19632e-07	1.85309e-06
LRRC16B	101.028	1.62783	0.186321	8.7367	2.4001e-18	2.47529e-17
SMOX	2365.31	1.61603	0.0447608	36.1038	1.9799e-285	1.07542e-282
RTN1	9.85652	1.61508	0.323325	4.99524	5.8764e-07	2.54467e-06
YAP1	20.7502	1.60938	0.297038	5.4181	6.02354e-08	2.91863e-07
AK1	41.3789	1.60651	0.248764	6.45798	1.06113e-10	6.51509e-10
CADM4	339.097	1.60545	0.105852	15.1669	5.85573e-52	1.94336e-50
OTOF	18.7967	1.60278	0.30372	5.27718	1.31188e-07	6.12699e-07
NTRK1	120.906	1.59572	0.16425	9.71522	2.59681e-22	3.32404e-21
KIAA1549L	12.5064	1.59205	0.320235	4.97152	6.64305e-07	2.85165e-06
DBNDD1	217.743	1.58889	0.128335	12.3807	3.32304e-35	6.87168e-34
CSRNP1	4284.81	1.58569	0.0343166	46.2076	0	0
PIM1	1164.78	1.58432	0.060819	26.0497	1.35521e-149	1.84026e-147
PVRL2	588.497	1.58372	0.0856799	18.4842	2.76925e-76	1.4795e-74
CBR3	275.73	1.58302	0.117016	13.5283	1.0652e-41	2.66218e-40
RASL10A	61.4606	1.58111	0.215747	7.32854	2.32668e-13	1.76423e-12
DDIT4	529.147	1.57905	0.0857573	18.413	1.03371e-75	5.46891e-74
GPR3	672.954	1.57577	0.0792272	19.8892	5.04622e-88	3.13848e-86
MLH3	17.2445	1.57234	0.310454	5.06466	4.09128e-07	1.80867e-06
LOC101928433	109.698	1.56318	0.174802	8.9426	3.80123e-19	4.08044e-18
CD79A	86.5118	1.55764	0.192707	8.08292	6.32361e-16	5.71827e-15
RNASE1	9.38645	1.55523	0.323376	4.80937	1.5141e-06	6.20843e-06
GIPC3	76.0067	1.55433	0.197737	7.8606	3.82288e-15	3.27862e-14
LCN10	130.779	1.55237	0.167819	9.25026	2.2395e-20	2.56991e-19
TNFSF15	25.4132	1.55182	0.283501	5.47376	4.40587e-08	2.16572e-07
CILP2	41.7949	1.55065	0.246693	6.28572	3.26338e-10	1.9344e-09
WDR96	34.1947	1.55055	0.263202	5.89111	3.83603e-09	2.07806e-08
C15orf48	37.6574	1.54983	0.257459	6.01969	1.74755e-09	9.74217e-09
PLAU	5083.96	1.54885	0.0690638	22.4263	2.17913e-111	1.92983e-109
GATA2	127.328	1.54548	0.164695	9.3839	6.35744e-21	7.55132e-20
PLEC	7418.9	1.54197	0.0866242	17.8007	6.98335e-71	3.37667e-69
NR4A2	1923.73	1.54054	0.104884	14.6881	7.67956e-49	2.33032e-47
FRMD1	337.265	1.53979	0.109497	14.0623	6.47045e-45	1.78705e-43
SERINC2	294.63	1.53567	0.108002	14.2189	6.99753e-46	1.96934e-44
MAP3K7CL	127.872	1.53533	0.170777	8.9903	2.46555e-19	2.68557e-18
USP12-AS2	42.2514	1.53416	0.24484	6.26594	3.70585e-10	2.18634e-09
NTN1	176.726	1.52556	0.137656	11.0825	1.52608e-28	2.50933e-27
CR1	7.0667	1.52175	0.319953	4.75618	1.97295e-06	7.99137e-06
PLA2G4C	464.27	1.52101	0.0883275	17.2201	1.87512e-66	8.44064e-65
RN7SK	96.9303	1.52038	0.187288	8.11788	4.7439e-16	4.32521e-15
SEMA3F	28.9153	1.51199	0.276543	5.46747	4.5651e-08	2.23792e-07
F2R	86.6131	1.50959	0.185477	8.13897	3.98656e-16	3.65771e-15
SVIL	1314.61	1.50315	0.055742	26.9662	3.68821e-160	5.61676e-158
EMP1	103.746	1.50204	0.174569	8.60428	7.67949e-18	7.72453e-17
ADIRF	43.4232	1.50007	0.242882	6.17615	6.56843e-10	3.80899e-09
ADRB2	18.7701	1.49933	0.303409	4.94163	7.74717e-07	3.30905e-06
MIR4435-1HG	968.035	1.49867	0.0645312	23.224	2.60342e-119	2.54028e-117
AP3B2	283.702	1.49814	0.113185	13.2362	5.4237e-40	1.30353e-38
PROX1-AS1	61.9796	1.49567	0.221891	6.74057	1.57765e-11	1.04038e-10
SCN4A	16.8301	1.49547	0.308677	4.84479	1.26748e-06	5.2567e-06
MYCL	32.9071	1.49532	0.266759	5.60551	2.07643e-08	1.05275e-07
ZNF250	131.502	1.49451	0.158813	9.41054	4.93599e-21	5.90544e-20
MAGEL2	47.4646	1.49376	0.239095	6.24755	4.16942e-10	2.45096e-09
LAMP3	5477.22	1.49175	0.0615545	24.2346	9.60565e-130	1.07208e-127
EFCAB5	84.966	1.48951	0.189025	7.87995	3.27511e-15	2.83119e-14
ZSWIM5	106.387	1.48917	0.178704	8.33317	7.87086e-17	7.50472e-16
FAM110C	1060.01	1.48848	0.0606222	24.5533	3.98525e-133	4.60565e-131
SHB	312.538	1.48839	0.106418	13.9862	1.89233e-44	5.12218e-43
FERMT2	276.041	1.48782	0.11752	12.6601	9.83556e-37	2.15707e-35
LINC00152	1257.83	1.4878	0.0563613	26.3976	1.45849e-153	2.0488e-151
LOC102723625	15.283	1.4859	0.312516	4.75465	1.98792e-06	8.04798e-06
RHOB	90.8933	1.48046	0.183688	8.05964	7.65183e-16	6.87357e-15
FER1L4	61.208	1.47718	0.220038	6.71329	1.9029e-11	1.2483e-10
CTRC	46.8848	1.47672	0.239233	6.1727	6.7133e-10	3.88608e-09
TTLL7	111.501	1.47144	0.170309	8.63983	5.62949e-18	5.69061e-17
CACNA2D2	55.6438	1.47073	0.22728	6.471	9.73553e-11	6.00684e-10
CBR3-AS1	35.0568	1.47011	0.259102	5.67386	1.39618e-08	7.19049e-08
S1PR4	11.8404	1.47006	0.320132	4.59204	4.38926e-06	1.70577e-05
SFN	24.1203	1.46818	0.286323	5.12769	2.93316e-07	1.31669e-06
CSF2	4338.11	1.46454	0.0807289	18.1414	1.50075e-73	7.69016e-72
SPRY1	2141.01	1.46315	0.0810974	18.0418	9.14494e-73	4.59929e-71
JUN	1414	1.46001	0.0530996	27.4956	1.97983e-166	3.32592e-164
YIPF7	12.9884	1.4596	0.317442	4.598	4.26556e-06	1.66127e-05
PPM1J	21.6636	1.45721	0.29571	4.92784	8.31444e-07	3.53559e-06
LOC100507507	150.594	1.45709	0.149934	9.71822	2.52162e-22	3.23034e-21
ACE	17.9858	1.4534	0.308391	4.71285	2.44271e-06	9.79427e-06
RNF122	170.844	1.44865	0.141597	10.2308	1.44301e-24	2.06262e-23
CTBP2	31.3006	1.44825	0.268266	5.39856	6.71787e-08	3.23677e-07
C2CD4A	32.9907	1.44482	0.261617	5.52266	3.33901e-08	1.65932e-07
DUSP1	623.03	1.44474	0.0826206	17.4865	1.81636e-68	8.43236e-67
SYNJ2	3322.77	1.44193	0.0738442	19.5267	6.50857e-85	3.82878e-83
ITPKA	1148.47	1.44119	0.059612	24.1761	3.96617e-129	4.39652e-127
IGFBP4	28.5142	1.43835	0.273459	5.25984	1.44179e-07	6.69154e-07
LOC100128593	38.2471	1.43086	0.250161	5.71976	1.06674e-08	5.55174e-08
OPN3	196.823	1.42983	0.130781	10.933	8.0141e-28	1.29169e-26
PLAUR	552.361	1.42786	0.0850696	16.7847	3.16053e-63	1.33422e-61
NRIP1	232.661	1.42487	0.124763	11.4206	3.30079e-30	5.7897e-29
TNFRSF12A	289.186	1.42481	0.10861	13.1185	2.57957e-39	6.10074e-38
RASGEF1C	31.3597	1.42258	0.265361	5.36093	8.27963e-08	3.9507e-07
PAOX	12.1957	1.42146	0.319666	4.4467	8.72005e-06	3.27178e-05
CRB1	10.8874	1.42141	0.321888	4.41586	1.00609e-05	3.737e-05
GPR137C	34.7286	1.41993	0.26398	5.37892	7.49343e-08	3.58817e-07
MICALCL	15.9899	1.41682	0.311017	4.55545	5.22734e-06	2.01227e-05
PAK6	57.025	1.41612	0.221314	6.39868	1.56727e-10	9.49746e-10
FAM83C-AS1	9.18641	1.41186	0.323299	4.36703	1.25947e-05	4.63486e-05
SDC2	10.0413	1.40765	0.322763	4.36123	1.29333e-05	4.75087e-05
PLEKHH1	203.706	1.40724	0.131027	10.7401	6.59643e-27	1.0237e-25
TNFSF9	1163.04	1.40537	0.058971	23.8315	1.57336e-125	1.68671e-123
MICAL2	405.346	1.39903	0.0951679	14.7006	6.3875e-49	1.9455e-47
NETO1	219.887	1.39851	0.128903	10.8493	2.00853e-27	3.17758e-26
LOC100996573	53.4694	1.39727	0.230755	6.05521	1.40232e-09	7.90957e-09
PLCE1	27.8772	1.39709	0.274886	5.08244	3.72626e-07	1.65268e-06
PHLDB2	119.357	1.39639	0.161725	8.63435	5.90618e-18	5.95921e-17
HLA-B-4	160.286	1.39461	0.143646	9.70869	2.7687e-22	3.53296e-21
LINC00936	53.9239	1.39406	0.222659	6.26096	3.82607e-10	2.25482e-09
DUSP4	50.485	1.39169	0.229743	6.05758	1.38187e-09	7.79693e-09
CCDC71L	1569.58	1.38946	0.0509833	27.2532	1.5209e-163	2.38299e-161
STRIP2	769.19	1.38522	0.0705691	19.6292	8.70262e-86	5.19448e-84
SYT12	23.912	1.38288	0.291751	4.73992	2.13802e-06	8.62568e-06
EVA1B	136.992	1.38058	0.151212	9.13015	6.84022e-20	7.63434e-19
TCIRG1	114.694	1.3726	0.175883	7.80406	5.99485e-15	5.08517e-14
HDC	113.472	1.37178	0.165469	8.29025	1.1301e-16	1.0663e-15
C2CD4C	237.272	1.37138	0.124848	10.9844	4.54451e-28	7.38313e-27
LRP1	93.2641	1.37074	0.181095	7.56914	3.757e-14	3.02622e-13
ZNF469	8.22624	1.36951	0.322567	4.24566	2.17951e-05	7.76288e-05
CADM2	56.1038	1.3694	0.221147	6.19227	5.93044e-10	3.45007e-09
USP53	1826.95	1.36837	0.0517244	26.4549	3.20394e-154	4.57967e-152
PHLDB1	1181.05	1.3608	0.0565958	24.0443	9.5855e-128	1.04829e-125
NR4A1	7500.5	1.36007	0.0677215	20.0833	1.03225e-89	6.62224e-88
NRARP	129.258	1.35912	0.165127	8.23075	1.86047e-16	1.73434e-15
C11orf96	2061.65	1.35808	0.0506742	26.8001	3.22078e-158	4.72816e-156
CDS1	22.9286	1.35702	0.295487	4.59249	4.37989e-06	1.70254e-05
MAST4	1291.23	1.35625	0.0617418	21.9664	6.03065e-107	5.06543e-105
SLAMF7	131.387	1.35493	0.154833	8.75092	2.11626e-18	2.19787e-17
IL13	136.63	1.35449	0.156702	8.64376	5.43947e-18	5.50536e-17
RP11-214C8.2	30.9495	1.35259	0.270979	4.99151	5.99093e-07	2.59151e-06
LPAR6	403.187	1.35191	0.0949776	14.234	5.6339e-46	1.58831e-44
KLHL21	1644.95	1.34957	0.0578633	23.3234	2.56386e-120	2.51675e-118
SIRPB1	133.983	1.34745	0.161174	8.36025	6.25842e-17	6.00595e-16
RGCC	3344.66	1.34612	0.0451341	29.8249	1.85752e-195	4.14635e-193
BRE-AS1	9.83359	1.34559	0.323295	4.1621	3.15335e-05	0.000109654
SCXB	66.6984	1.3448	0.203105	6.62117	3.56368e-11	2.27994e-10
VDR	245.554	1.3413	0.118729	11.2971	1.35568e-29	2.33518e-28
PTCHD2	39.9218	1.3411	0.245944	5.45288	4.956e-08	2.41935e-07
LCN6	50.8832	1.34048	0.229686	5.83611	5.34338e-09	2.86227e-08
GRASP	321.369	1.33932	0.103672	12.9189	3.52356e-38	8.0641e-37
EFR3B	18.618	1.33854	0.301692	4.43678	9.13134e-06	3.41351e-05
TMEM2	1778.53	1.33636	0.0467103	28.6096	5.09778e-180	9.77275e-178
ADORA2B	976.666	1.33414	0.0622177	21.4431	5.29331e-102	4.16688e-100
CD55	1185.44	1.33363	0.0603651	22.0927	3.71433e-108	3.15235e-106
TMPRSS5	23.6712	1.32807	0.286753	4.6314	3.63196e-06	1.42506e-05
SHC2	17.1537	1.32561	0.304743	4.34992	1.36189e-05	4.98922e-05
GSTA4	113.683	1.3252	0.164228	8.0693	7.07021e-16	6.37924e-15
LARGE	37.3615	1.32438	0.251464	5.26667	1.38923e-07	6.45862e-07
LOC101928143	24.8658	1.32402	0.284115	4.66017	3.15955e-06	1.24872e-05
PAM	704.286	1.32361	0.0725534	18.2433	2.3384e-74	1.21351e-72
TMSB15A	429.221	1.32224	0.0895706	14.762	2.57706e-49	7.92324e-48
DUOX1	25.5882	1.32203	0.281823	4.69099	2.71891e-06	1.08404e-05
SLC26A4	22.4684	1.32059	0.288792	4.57279	4.81268e-06	1.86144e-05
PILRA	58.6592	1.32055	0.21739	6.07456	1.24332e-09	7.03955e-09
LZTS3	265.855	1.32034	0.111855	11.804	3.72122e-32	7.05084e-31
TUBB2B	111.664	1.3193	0.173539	7.60233	2.90854e-14	2.35912e-13
HGC6.3	20.7525	1.31914	0.295901	4.45804	8.27131e-06	3.11057e-05
LIPG	10.0636	1.31784	0.322787	4.08269	4.45169e-05	0.000151599
VGF	953.232	1.31758	0.065369	20.156	2.38348e-90	1.54736e-88
UPP1	146.514	1.31662	0.15263	8.62627	6.33879e-18	6.39174e-17
CCKBR	40.0137	1.31614	0.253547	5.1909	2.09283e-07	9.55523e-07
FLJ46026	21.8036	1.31295	0.297975	4.40623	1.05186e-05	3.89812e-05
NCF4	11.7017	1.31196	0.319711	4.10359	4.06796e-05	0.000139462
TMEM255A	8.84396	1.31041	0.323326	4.05292	5.0582e-05	0.000170543
PREX1	1366.87	1.30858	0.0527599	24.8025	8.42439e-136	9.94749e-134
SNCA	23.9405	1.30655	0.283325	4.61147	3.99832e-06	1.56129e-05
NR4A3	11811.7	1.30444	0.0805087	16.2024	4.84742e-59	1.89877e-57
KCNQ1OT1	38.8958	1.30443	0.253637	5.1429	2.70524e-07	1.22009e-06
GRID2IP	28.2772	1.30247	0.274256	4.74908	2.04342e-06	8.25832e-06
LOC100996350	9.90139	1.2995	0.322827	4.02536	5.68875e-05	0.000190698
LIF	479.793	1.29941	0.0908622	14.3008	2.16172e-46	6.17986e-45
ENC1	442.978	1.29903	0.0888345	14.623	2.00397e-48	6.02484e-47
RGS9	72.4289	1.29788	0.200143	6.48475	8.88776e-11	5.50879e-10
DUSP5	4486.5	1.29559	0.0356807	36.3105	1.10388e-288	6.20266e-286
FA2H	9.20768	1.29355	0.323299	4.00108	6.30528e-05	0.000209897
NAV1	112.187	1.29193	0.17698	7.29988	2.8802e-13	2.17081e-12
PPP1R15A	3508.05	1.28961	0.0371065	34.7542	1.19849e-264	5.2782e-262
C3orf52	6.87787	1.28709	0.319907	4.02333	5.73819e-05	0.000192157
TMEM217	418.495	1.28697	0.0956862	13.4499	3.08276e-41	7.61115e-40
KRT79	16.1765	1.28695	0.307666	4.18294	2.87761e-05	0.000100645
STATH	29.7451	1.28651	0.272058	4.72881	2.25839e-06	9.07311e-06
KLF14	10.5294	1.28613	0.322602	3.98673	6.69911e-05	0.000222417
FSTL1	16.8247	1.28602	0.306498	4.19584	2.71861e-05	9.54736e-05
RASL11A	55.5567	1.28418	0.226232	5.67638	1.37573e-08	7.08742e-08
DRP2	23.5879	1.28333	0.285176	4.50014	6.79099e-06	2.58007e-05
DISP1	243.536	1.28325	0.121053	10.6008	2.95514e-26	4.46698e-25
BBC3	122.849	1.28271	0.159085	8.06307	7.44033e-16	6.69125e-15
ITGAV	1870.85	1.28231	0.0499608	25.6664	2.77543e-145	3.64723e-143
HAS3	29.4064	1.27463	0.278023	4.58462	4.54818e-06	1.76543e-05
DUSP16	1164.03	1.27114	0.0580811	21.8856	3.56553e-106	2.9795e-104
ATXN1	925.198	1.27029	0.0649122	19.5693	2.82492e-85	1.67389e-83
HRH1	595.018	1.26849	0.0837787	15.141	8.68937e-52	2.84324e-50
TJP3	49.6665	1.26771	0.227195	5.57983	2.40748e-08	1.21192e-07
NRP1	121.764	1.26748	0.159278	7.95768	1.75291e-15	1.54398e-14
SPACA4	11.9762	1.26721	0.320046	3.95948	7.51139e-05	0.000247619
SLC22A4	64.1003	1.26606	0.207547	6.10014	1.05976e-09	6.03382e-09
MC1R	204.162	1.26222	0.139961	9.01837	1.90908e-19	2.08641e-18
ZDHHC11B	26.2918	1.2609	0.278012	4.53543	5.74871e-06	2.20412e-05
JAG1	53.7335	1.25984	0.222937	5.65113	1.59394e-08	8.16256e-08
LRIG1	230.634	1.25862	0.120319	10.4607	1.30833e-25	1.93635e-24
TIAM1	1705.15	1.25764	0.0509337	24.6917	1.31444e-134	1.54092e-132
THAP2	246.651	1.25747	0.12987	9.68254	3.57707e-22	4.5255e-21
HIPK2	2340.3	1.25718	0.0863614	14.5572	5.25784e-48	1.56059e-46
LINC01160	15.1684	1.25712	0.309591	4.06057	4.89524e-05	0.000165597
RETN	56.8258	1.25197	0.21773	5.75011	8.91859e-09	4.68499e-08
NXPH4	81.6907	1.24859	0.191487	6.52046	7.00932e-11	4.38621e-10
FLJ45964	24.5136	1.24854	0.283637	4.40187	1.0732e-05	3.9727e-05
LOC101928762	30.9345	1.24767	0.269374	4.63175	3.62585e-06	1.42335e-05
TMEM151A	203.21	1.24562	0.126487	9.84783	7.00393e-23	9.18175e-22
SLC16A3	531.003	1.24529	0.0821683	15.1554	6.98277e-52	2.29867e-50
YES1	2226.63	1.24426	0.0427164	29.1283	1.57271e-186	3.37202e-184
RFPL3S	19.8092	1.24254	0.298569	4.16165	3.1596e-05	0.000109848
KIAA1324	124.115	1.24048	0.159856	7.76	8.4928e-15	7.16676e-14
BMP1	888.325	1.24015	0.0634146	19.5562	3.65574e-85	2.15835e-83
KCNK1	1095.69	1.23901	0.0585168	21.1735	1.6767e-99	1.29488e-97
LOC101928263	43.3679	1.23654	0.241344	5.12354	2.99846e-07	1.34378e-06
LFNG	551.791	1.2362	0.0821811	15.0423	3.87574e-51	1.24077e-49
TG	42.9955	1.23393	0.247856	4.97844	6.40988e-07	2.75809e-06
FAM83E	51.0847	1.23357	0.228274	5.4039	6.52072e-08	3.14923e-07
UBTD1	311.932	1.2335	0.10425	11.8321	2.66452e-32	5.07224e-31
LOC102723663	115.122	1.23209	0.16502	7.46629	8.24846e-14	6.48559e-13
TDRD9	1657.49	1.23208	0.0992927	12.4086	2.34717e-35	4.88469e-34
NLRP3	135.462	1.23152	0.151363	8.13622	4.07815e-16	3.73754e-15
NRIP3	1189.34	1.2312	0.0556719	22.1153	2.25139e-108	1.93086e-106
HLA-B	747.711	1.2298	0.0695112	17.6922	4.81997e-70	2.30327e-68
SH3BP5	495.278	1.22872	0.0865647	14.1942	9.9503e-46	2.79071e-44
IL31	18.536	1.22848	0.30117	4.07903	4.52243e-05	0.000153816
TMEM88	347.314	1.22598	0.106823	11.4767	1.72697e-30	3.06547e-29
GPER1	9.71625	1.22379	0.322547	3.79415	0.000148151	0.000471325
PLTP	12.056	1.22255	0.318295	3.84095	0.000122559	0.000393924
STC1	6.92774	1.22222	0.321322	3.80373	0.000142535	0.000454343
CAMK2N1	485.929	1.22035	0.0857084	14.2384	5.28991e-46	1.49392e-44
HDX	72.5627	1.21662	0.198565	6.12705	8.95214e-10	5.13283e-09
SHF	344.309	1.21619	0.101582	11.9725	4.95024e-33	9.64882e-32
GNG12	17.6003	1.21507	0.303523	4.00321	6.24888e-05	0.000208104
PRNP	5776	1.21373	0.0361065	33.6152	1.00569e-247	3.90182e-245
SRC	1622.58	1.21338	0.0512523	23.6747	6.57334e-124	6.95536e-122
NYNRIN	30.0114	1.21278	0.270742	4.47945	7.4834e-06	2.82469e-05
PLXNB2	39.5948	1.21251	0.2501	4.84809	1.24657e-06	5.17921e-06
CYP26B1	187.693	1.2123	0.133814	9.05958	1.30951e-19	1.44277e-18
MCF2	10.8363	1.21141	0.321361	3.76961	0.0001635	0.000516224
PRSS2	10.901	1.21065	0.32122	3.76893	0.000163951	0.000517449
GAB2	70.8014	1.20794	0.200531	6.02367	1.70501e-09	9.51152e-09
MIAT	444.561	1.2053	0.0928566	12.9802	1.5847e-38	3.66278e-37
CD52	83.1945	1.20048	0.188057	6.38358	1.72995e-10	1.0456e-09
CNN1	6.9011	1.20028	0.320674	3.743	0.000181836	0.000570688
UCN2	8.77086	1.19919	0.323338	3.70879	0.000208253	0.000648105
MYO1D	1336.38	1.19875	0.0591729	20.2585	2.99173e-91	1.9898e-89
AC007879.2	15.6495	1.19737	0.308231	3.88466	0.000102473	0.000332365
MAP7	88.9957	1.19679	0.180687	6.62357	3.50625e-11	2.24408e-10
ARRDC3	626.871	1.19666	0.0816617	14.6539	1.27161e-48	3.84432e-47
CR2	58.0735	1.19612	0.225245	5.31032	1.09435e-07	5.14791e-07
TMIGD2	11.3415	1.19479	0.320706	3.72551	0.000194923	0.000609028
CHSY3	7.24692	1.19324	0.322338	3.70183	0.000214051	0.000664754
ANKRD33B	1107.01	1.19309	0.0576906	20.6809	5.14494e-95	3.69325e-93
THEG	9.412	1.19226	0.323372	3.68695	0.000226956	0.000701897
FBN1	232.46	1.19104	0.125881	9.46166	3.03093e-21	3.66387e-20
PTPRJ	60.8335	1.19006	0.213402	5.57658	2.45293e-08	1.23404e-07
RP11-540A21.2	80.8879	1.18971	0.187176	6.35609	2.06953e-10	1.24393e-09
KLF4	45.9029	1.1897	0.231114	5.1477	2.63696e-07	1.19028e-06
ADAMTSL4	24.8285	1.18848	0.290574	4.0901	4.31178e-05	0.000147235
SEMA3B	23.9843	1.18626	0.287189	4.1306	3.61817e-05	0.000124938
HLA-C-4	55.4398	1.18508	0.221916	5.3402	9.28435e-08	4.40432e-07
C10orf67	18.8136	1.18388	0.297592	3.9782	6.9438e-05	0.000230118
EFCAB12	27.4118	1.18356	0.276485	4.28072	1.86286e-05	6.69062e-05
TTYH3	1750.45	1.18329	0.0476297	24.8435	3.03833e-136	3.64041e-134
LOC101929285	10.53	1.18322	0.32136	3.68192	0.000231482	0.000714801
HLA-B-2	52.1504	1.18223	0.227512	5.19635	2.03239e-07	9.2923e-07
SH2D5	35.8033	1.17771	0.253071	4.65369	3.26054e-06	1.28583e-05
SPATC1	5.08857	1.17628	0.309835	3.79647	0.000146769	0.000467201
HPCAL4	33.5197	1.17603	0.256742	4.58058	4.63693e-06	1.79731e-05
LRRFIP2	2173.67	1.17548	0.0444043	26.4722	2.0284e-154	2.92502e-152
C22orf23	193.759	1.17512	0.127951	9.18415	4.14785e-20	4.69369e-19
TBC1D4	4048.2	1.16993	0.0374203	31.2646	1.4119e-214	3.96672e-212
CASZ1	534.19	1.16715	0.0802292	14.5477	6.04009e-48	1.78951e-46
SLC22A2	9.90168	1.16689	0.322326	3.62023	0.000294344	0.000893688
ZYX	2180.93	1.16597	0.0441667	26.3993	1.39627e-153	1.97845e-151
KIAA1045	111.667	1.16435	0.163205	7.13428	9.72927e-13	7.05871e-12
LOC102724428	50.9717	1.16406	0.23391	4.97653	6.47358e-07	2.78403e-06
TGFB2	32.2112	1.16251	0.259649	4.47724	7.56141e-06	2.85282e-05
PHYHIP	5.44134	1.16153	0.314549	3.6927	0.000221889	0.000686869
DOCK4	78.3405	1.15963	0.188338	6.15714	7.40685e-10	4.27692e-09
EOMES	1727.67	1.15936	0.052207	22.2069	2.9448e-109	2.56607e-107
LOC100288175	101.647	1.15799	0.169057	6.84971	7.39997e-12	5.00966e-11
PMEPA1	2066.6	1.1554	0.0464844	24.8557	2.24624e-136	2.71129e-134
ARVCF	222.229	1.15359	0.120339	9.58612	9.14621e-22	1.13423e-20
MMP24	21.7433	1.15252	0.289968	3.97464	7.04848e-05	0.000233255
RDH10	865.115	1.15134	0.0704719	16.3375	5.33617e-60	2.1208e-58
CUBN	63.9842	1.1472	0.205976	5.56958	2.55353e-08	1.28267e-07
FLT1	2648.6	1.1463	0.0412771	27.7708	9.77307e-170	1.731e-167
SH2D2A	1658.54	1.1453	0.0497813	23.0066	4.00586e-117	3.77315e-115
STARD10	289.788	1.14143	0.107304	10.6374	1.99697e-26	3.03834e-25
SUSD5	10.7051	1.14128	0.320673	3.55902	0.000372247	0.00111364
HHLA2	113.959	1.14031	0.163034	6.9943	2.66589e-12	1.86571e-11
PLEKHA6	30.2814	1.14015	0.264509	4.31044	1.62928e-05	5.89717e-05
JMJD1C	4541.56	1.13947	0.0323901	35.1796	4.09522e-271	1.96269e-268
SLC16A8	9.39957	1.13873	0.323274	3.52248	0.000427533	0.00126743
FXYD6	36.6104	1.13742	0.251634	4.52013	6.18008e-06	2.36063e-05
SIGLEC10	41.4186	1.13639	0.241171	4.71196	2.45341e-06	9.82509e-06
SOX30	6.77557	1.13566	0.31896	3.56053	0.000370111	0.00110762
SLC45A1	58.1178	1.13073	0.218869	5.16622	2.38869e-07	1.08393e-06
GPSM1	686.849	1.12947	0.0736607	15.3334	4.57751e-53	1.56703e-51
ZFHX2	233.136	1.12839	0.123631	9.12712	7.03488e-20	7.8355e-19
MAP2	45.0523	1.12723	0.24065	4.68412	2.8117e-06	1.11721e-05
LOC101928629	16.025	1.12698	0.306106	3.68166	0.000231725	0.000715414
KNDC1	36.5806	1.12677	0.269613	4.17921	2.92524e-05	0.000102267
CELF6	116.565	1.12628	0.163775	6.877	6.11258e-12	4.16407e-11
IGF2BP2	19.6744	1.12596	0.299817	3.7555	0.000172994	0.000544197
HR	179.715	1.12593	0.131298	8.57536	9.87742e-18	9.88045e-17
B4GALNT4	118.445	1.1258	0.17366	6.48278	9.00497e-11	5.57931e-10
ADCY1	76.9977	1.12384	0.196052	5.73238	9.9029e-09	5.17536e-08
LRRC8E	256.221	1.12262	0.111728	10.0478	9.39787e-24	1.2934e-22
ATRNL1	322.2	1.12238	0.101085	11.1033	1.20848e-28	1.99921e-27
SIRPG	197.187	1.1215	0.127825	8.77374	1.72831e-18	1.80415e-17
TNKS1BP1	701.253	1.12132	0.0706672	15.8676	1.06159e-56	3.96759e-55
FABP6	132.412	1.11986	0.160007	6.99881	2.58142e-12	1.80766e-11
ACVR1	662.884	1.11242	0.0734919	15.1366	9.29226e-52	3.03442e-50
CST3	386.43	1.1119	0.0970638	11.4554	2.20973e-30	3.8927e-29
GOLGA7B	18.5456	1.11181	0.304667	3.64925	0.000263005	0.000805122
AGPAT9	702.344	1.10819	0.0712428	15.555	1.4705e-54	5.24329e-53
GRAMD1C	144.31	1.10741	0.148921	7.43625	1.03581e-13	8.08357e-13
SOX13	8.43327	1.105	0.323373	3.41711	0.000632903	0.0018276
TOR1AIP1	4038.91	1.10433	0.0347855	31.7468	3.51661e-221	1.08119e-218
RAB11FIP4	348.686	1.10247	0.100501	10.9697	5.34494e-28	8.64904e-27
IRGM	11.6595	1.10144	0.320335	3.43841	0.000585134	0.00169871
FAM131A	385.513	1.10003	0.099712	11.0321	2.67537e-28	4.38142e-27
AGPAT4-IT1	20.659	1.09885	0.293175	3.74809	0.000178183	0.000559871
SLC6A8	163.353	1.09631	0.139969	7.83253	4.78165e-15	4.0709e-14
HLA-B-5	144.502	1.0963	0.145804	7.51896	5.52153e-14	4.40183e-13
RASSF8	131.998	1.09564	0.158173	6.92689	4.302e-12	2.9591e-11
MEGF6	49.0809	1.09563	0.22744	4.81723	1.45566e-06	5.98837e-06
FZD7	131.496	1.09485	0.151484	7.22748	4.92022e-13	3.65262e-12
LOC729222	11.6701	1.0923	0.32066	3.40641	0.000658232	0.00189671
MSX1	478.522	1.09135	0.0842019	12.9612	2.03129e-38	4.68836e-37
CATSPERG	40.3648	1.087	0.240586	4.51815	6.2383e-06	2.38119e-05
FNBP1L	1186.23	1.08654	0.0595922	18.2328	2.83254e-74	1.46528e-72
RTN2	132.596	1.08646	0.159058	6.83056	8.45845e-12	5.70963e-11
B3GAT1	350.909	1.0864	0.105995	10.2496	1.18809e-24	1.70272e-23
SHANK1	285.803	1.0858	0.121156	8.96198	3.189e-19	3.45281e-18
ZNF568	14.7203	1.08564	0.31136	3.48677	0.000488898	0.0014349
EVI2B	2982.49	1.08556	0.0454705	23.8739	5.71696e-126	6.1694e-124
IRF8	781.221	1.08552	0.0681013	15.9398	3.35646e-57	1.26605e-55
KIF25-AS1	741.798	1.08417	0.0705344	15.3708	2.56975e-53	8.85286e-52
PPP1R14C	12.8645	1.0841	0.314815	3.44361	0.000573994	0.00166843
PP13	126.191	1.0834	0.158839	6.82075	9.05638e-12	6.09305e-11
INPP5J	15.5163	1.08238	0.307056	3.52503	0.00042344	0.00125636
FHL2	457.2	1.08191	0.090917	11.8999	1.1846e-32	2.28439e-31
TRAF1	11382.4	1.08123	0.0243069	44.4825	0	0
ANKRD36C	237.828	1.07998	0.12777	8.45252	2.85075e-17	2.78662e-16
RBFOX3	7.59084	1.07935	0.323098	3.34063	0.000835888	0.00237503
SORBS1	46.1264	1.07911	0.235545	4.58132	4.6204e-06	1.79133e-05
NTSR1	32.6496	1.07896	0.269385	4.00527	6.19472e-05	0.000206385
REM2	19.6318	1.07886	0.293693	3.67343	0.000239315	0.000736336
PPP2R2D	3868.76	1.07869	0.0354939	30.3908	7.27229e-203	1.85159e-200
YJEFN3	257.317	1.078	0.117321	9.18844	3.98587e-20	4.51353e-19
CTSV	345.869	1.07773	0.0995686	10.824	2.65008e-27	4.16423e-26
CXCL2	11.2237	1.07117	0.319298	3.35477	0.000794302	0.0022616
LOC100130238	20.7386	1.07006	0.294655	3.63159	0.000281679	0.000857973
DST	219.066	1.06984	0.126906	8.43022	3.45008e-17	3.35435e-16
EBF4	39.0689	1.06928	0.244823	4.36757	1.25635e-05	4.62441e-05
MYLK	41.4388	1.06784	0.240104	4.44741	8.69125e-06	3.26172e-05
MIR4697HG	408.551	1.06714	0.101523	10.5114	7.65592e-26	1.14558e-24
PLEKHN1	10.829	1.06576	0.321633	3.31358	0.000921108	0.00259859
GADD45G	3.9449	1.0647	0.29705	3.58423	0.000338075	0.00101659
LHFP	67.9947	1.06466	0.198826	5.35475	8.56771e-08	4.07861e-07
CCL4L2	21.0867	1.06362	0.291517	3.64857	0.000263703	0.000806955
LMTK3	66.4516	1.06258	0.217507	4.88526	1.0329e-06	4.329e-06
ABCC12	26.4777	1.06212	0.277244	3.831	0.000127623	0.000409292
EPHA1	23.741	1.05778	0.28618	3.69621	0.000218846	0.000678482
PRSS2-2	10.1747	1.0571	0.322288	3.27998	0.00103815	0.00289322
ABHD6	275.907	1.05535	0.115049	9.17306	4.59795e-20	5.18144e-19
LOC101927119	11.9425	1.0537	0.319263	3.30041	0.000965425	0.00271094
APOBEC3B	148.4	1.05218	0.147201	7.1479	8.81127e-13	6.41267e-12
GPR35	12.7411	1.05043	0.316193	3.32211	0.000893384	0.00252913
PAQR9	5.44844	1.04976	0.314572	3.3371	0.00084658	0.00240164
FLVCR2	26.5716	1.04674	0.27506	3.80551	0.00014151	0.000451165
GPD1	68.4515	1.0459	0.201872	5.18099	2.20717e-07	1.00547e-06
DIP2B	3638.26	1.04482	0.0349435	29.9004	1.94601e-196	4.53004e-194
ZDHHC14	83.7068	1.0443	0.182441	5.72402	1.04031e-08	5.42633e-08
NIPSNAP3B	12.5137	1.04336	0.316136	3.30035	0.000965634	0.00271106
MT1F	224.362	1.04326	0.119756	8.71148	2.9993e-18	3.07574e-17
BCL2A1	3690.84	1.04311	0.0378159	27.5838	1.73956e-167	3.04798e-165
VAMP8	23.4455	1.04227	0.28371	3.67371	0.000239056	0.000735819
ADAM33	9.37808	1.04156	0.322575	3.22888	0.00124278	0.00340582
44078	27.7949	1.04096	0.274432	3.79316	0.00014874	0.000472965
AMOTL2	46.5511	1.0394	0.232265	4.47507	7.63849e-06	2.8799e-05
LBX2-AS1	31.0147	1.03824	0.263453	3.94091	8.11722e-05	0.00026705
HIST3H2A	32.4586	1.03725	0.25942	3.99834	6.3789e-05	0.000212217
LOC101927681	50.0231	1.03688	0.23194	4.47047	7.80482e-06	2.93989e-05
PLCB1	292.018	1.03503	0.105028	9.85481	6.5342e-23	8.58667e-22
ANXA2	2386.88	1.03269	0.0431748	23.9187	1.95725e-126	2.12623e-124
LOC100506713	81.872	1.03221	0.189121	5.45795	4.81656e-08	2.35623e-07
DSCAML1	8.58016	1.03185	0.323362	3.19099	0.00141785	0.00384029
STX1B	14.7603	1.03095	0.311054	3.31437	0.000918485	0.00259209
APC2	103.95	1.03076	0.16826	6.12595	9.01425e-10	5.16481e-09
SATB2	1112.35	1.02852	0.0573786	17.9251	7.51137e-72	3.67561e-70
LOC100287823	10.5861	1.02637	0.32313	3.17632	0.00149155	0.00402531
SEZ6L2	763.323	1.02633	0.0707551	14.5054	1.11968e-47	3.29336e-46
NIPAL1	21.9346	1.02585	0.292681	3.50501	0.000456583	0.0013471
NGF	5.93571	1.0234	0.31642	3.2343	0.0012194	0.00334797
ZNF165	171.787	1.02161	0.13605	7.50909	5.95414e-14	4.73281e-13
TMEM130	11.335	1.02062	0.319599	3.19345	0.00140582	0.003811
SOCS3	178.612	1.01958	0.132162	7.71467	1.21292e-14	1.00891e-13
NPAS1	109.788	1.01911	0.164917	6.17952	6.42972e-10	3.73121e-09
CD44	135.319	1.01825	0.157312	6.4728	9.62051e-11	5.94712e-10
MSTN	8.0778	1.018	0.322774	3.15392	0.00161091	0.00431141
CCRL2	129.539	1.01715	0.156845	6.48504	8.87089e-11	5.50042e-10
MAFA	26.5508	1.01643	0.273952	3.71024	0.000207062	0.000645016
TNFRSF10B	4889.44	1.01617	0.0330571	30.7398	1.67221e-207	4.39494e-205
IL11	22.9333	1.016	0.283357	3.58558	0.000336336	0.00101155
TMOD1	27.0887	1.01554	0.272039	3.73308	0.000189151	0.000591825
CLIP2	804.809	1.01512	0.0653464	15.5344	2.02998e-54	7.22238e-53
SERPINB2	1683.95	1.01506	0.157034	6.46391	1.02031e-10	6.27632e-10
CD101	8.45388	1.0149	0.323357	3.13866	0.00169725	0.00452794
HGSNAT	869.479	1.0146	0.0639086	15.8757	9.33072e-57	3.49527e-55
GPR126	8.23333	1.01373	0.323375	3.13483	0.00171956	0.00458297
KCTD19	94.6639	1.01285	0.173586	5.83489	5.38263e-09	2.8814e-08
CCDC92	49.259	1.01149	0.223442	4.52684	5.98734e-06	2.29131e-05
C9orf139	191.566	1.01105	0.128667	7.85791	3.906e-15	3.34815e-14
PLXNB3	51.0022	1.00945	0.232601	4.33984	1.42589e-05	5.21077e-05
TSLP	198.597	1.00895	0.125162	8.06121	7.55449e-16	6.78988e-15
CCDC62	298.195	1.00625	0.104243	9.65286	4.78023e-22	6.03361e-21
CEBPD	72.4857	1.00468	0.193036	5.20464	1.94371e-07	8.90433e-07
RNF144A-AS1	9.06909	1.00331	0.323343	3.10291	0.00191626	0.00506332
LOC101059915	15.9754	1.00324	0.309484	3.24167	0.00118833	0.00327036
PXN	618.523	1.00233	0.0861578	11.6336	2.78076e-31	5.06285e-30
DCHS1	415.986	1.00152	0.093978	10.657	1.61716e-26	2.47666e-25
ZNF629	96.018	1.00145	0.17443	5.74127	9.39671e-09	4.92187e-08
PCBP3	25.4453	1.00097	0.279155	3.58572	0.000336151	0.00101118
GALNT4	16.893	1.00019	0.303496	3.29557	0.000982205	0.00275284
TECPR2	477.483	0.998725	0.0853488	11.7017	1.24941e-31	2.30307e-30
CD38	173.783	0.998539	0.134039	7.44964	9.3595e-14	7.33236e-13
TMEM150C	84.3158	0.998484	0.185028	5.3964	6.79927e-08	3.27406e-07
ALDH8A1	16.8275	0.998079	0.304616	3.27651	0.00105099	0.00292449
SECISBP2L	4302.59	0.997637	0.0320059	31.1704	2.68594e-213	7.4182e-211
XIRP1	2108.53	0.997585	0.0439835	22.6809	6.91643e-114	6.29627e-112
DNALI1	14.2009	0.997324	0.311428	3.20242	0.00136276	0.00370227
LOC101927144	19.8218	0.995705	0.295055	3.37464	0.000739114	0.00211185
ZNF517	132.07	0.99551	0.153813	6.47223	9.65698e-11	5.96514e-10
NEUROG2	10.7656	0.995327	0.320767	3.10296	0.00191596	0.00506332
LOC100505797	16.1395	0.995284	0.305188	3.26121	0.00110937	0.00306965
SYNM	12.9121	0.994512	0.316879	3.13846	0.00169837	0.00453018
FBXO32	97.0256	0.99315	0.172069	5.77183	7.84163e-09	4.14868e-08
RP11-475N22.4	6.5602	0.99306	0.320854	3.09505	0.00196777	0.00518848
PYGL	12.9353	0.992615	0.318835	3.11326	0.00185036	0.00490668
FJX1	156.265	0.991547	0.139776	7.09385	1.30431e-12	9.37111e-12
C2orf48	49.2209	0.990841	0.230975	4.28982	1.7882e-05	6.43806e-05
BZRAP1	15116.8	0.989975	0.0301834	32.7986	6.15891e-236	2.09082e-233
TNIP2	2580.17	0.989293	0.0408055	24.2441	7.63485e-130	8.58e-128
ABAT	821.915	0.987811	0.067634	14.6052	2.60028e-48	7.76036e-47
SELM	79.1463	0.987468	0.194554	5.07554	3.86403e-07	1.71192e-06
DNAH6	48.7795	0.986974	0.23281	4.2394	2.24119e-05	7.97211e-05
RHEBP2	20.3901	0.986896	0.294003	3.35676	0.000788629	0.00224702
PROCR	8.88114	0.98618	0.323336	3.05001	0.00228831	0.00596323
IGSF3	418.282	0.986002	0.0898053	10.9793	4.80454e-28	7.79006e-27
PPP2R3A	394.134	0.985983	0.0997336	9.88616	4.77991e-23	6.32726e-22
STX1A	433.386	0.985384	0.0883317	11.1555	6.73209e-29	1.12859e-27
RPTOR	3946.9	0.984799	0.0328609	29.9688	2.50587e-197	6.00488e-195
DNAJB5	2499.25	0.98447	0.0419206	23.4842	5.92091e-122	5.99262e-120
THSD7A	10.7589	0.983965	0.321347	3.062	0.00219862	0.00574327
RNF19A	2943.17	0.983226	0.0417991	23.5226	2.39348e-122	2.45294e-120
INA	11.745	0.982999	0.319317	3.07844	0.00208086	0.00546412
LTBP4	5286.32	0.982767	0.0340644	28.8503	5.02275e-183	1.01044e-180
SPARC	281.895	0.981272	0.108797	9.0193	1.89292e-19	2.07154e-18
AIM1L	21.2871	0.979647	0.293451	3.33836	0.000842734	0.00239156
LOC102723541	7.41583	0.978889	0.323077	3.02989	0.00244641	0.00633771
SOSTDC1	52.6549	0.978848	0.22749	4.30281	1.68644e-05	6.09056e-05
LOC101927959	8.58893	0.978491	0.323343	3.02617	0.00247674	0.00641017
PALLD	1657.17	0.978456	0.0481155	20.3356	6.23116e-92	4.2484e-90
GPC3	31.5521	0.978294	0.261737	3.7377	0.000185713	0.000582297
CEACAM19	16.495	0.977612	0.304046	3.21534	0.00130291	0.0035527
ZFP36L1	5093.98	0.97678	0.0308972	31.6138	2.38271e-219	7.19004e-217
CXCL16	60.3594	0.97675	0.206546	4.72897	2.25663e-06	9.06826e-06
NFIL3	665.71	0.976555	0.0744207	13.1221	2.46043e-39	5.82742e-38
FGFR3	84.7819	0.975754	0.189733	5.14279	2.70693e-07	1.22052e-06
MTHFS	225.601	0.974801	0.122909	7.93109	2.1723e-15	1.90309e-14
CGREF1	13.0558	0.974523	0.315062	3.09312	0.00198066	0.00521515
EHD4	934.171	0.974068	0.0614623	15.8482	1.44644e-56	5.38123e-55
DLC1	104.502	0.973208	0.169477	5.74242	9.33322e-09	4.89333e-08
SBSN	6.5616	0.973051	0.320139	3.03947	0.00236996	0.0061573
LOC101927895	33.4022	0.972948	0.254768	3.81896	0.000134016	0.000428699
MICALL1	1501.82	0.972624	0.0499302	19.4797	1.63352e-84	9.50649e-83
ST8SIA6	31.868	0.971416	0.265066	3.66481	0.000247527	0.000760453
PPARG	7.5436	0.969347	0.322644	3.00438	0.0026612	0.00685601
FAM53C	1737.68	0.968674	0.0462806	20.9305	2.8271e-97	2.11319e-95
NUMB	2543.21	0.968249	0.0394212	24.5616	3.2486e-133	3.78114e-131
NFAT5	2406.95	0.968163	0.0459558	21.0673	1.58885e-98	1.22124e-96
CYR61	27.1555	0.967831	0.276999	3.49398	0.000475869	0.0014007
SLC22A23	191.658	0.96754	0.12709	7.613	2.67801e-14	2.17755e-13
LRP4	114.63	0.967222	0.161516	5.98841	2.119e-09	1.17207e-08
EIF2AK3	1063.74	0.965802	0.0595109	16.229	3.14504e-59	1.23789e-57
VWA5A	641.69	0.965308	0.0753576	12.8097	1.44692e-37	3.27465e-36
POU6F1	279.19	0.965274	0.107648	8.96693	3.04899e-19	3.30561e-18
APOE	19.478	0.965062	0.296193	3.25822	0.00112112	0.00309743
CAST	1011.47	0.964738	0.0632515	15.2524	1.58706e-52	5.35427e-51
LINC01140	6.94516	0.964469	0.322055	2.99473	0.00274688	0.00704776
INSL3	16.366	0.962592	0.304212	3.16421	0.00155503	0.00417588
APBB1	172.687	0.962466	0.135763	7.08932	1.34771e-12	9.67439e-12
RAB39B	713.797	0.962346	0.0766198	12.56	3.50263e-36	7.53967e-35
HSPA2	50.9782	0.961961	0.229055	4.19969	2.67276e-05	9.39444e-05
ARMCX4	288.242	0.961287	0.117286	8.19611	2.48299e-16	2.30543e-15
KIF1A	9.3618	0.960974	0.322848	2.97655	0.00291509	0.00745353
IER5L	30.7994	0.960356	0.267326	3.59246	0.000327573	0.000987567
SPRY2	424.286	0.960202	0.0890422	10.7837	4.11096e-27	6.41035e-26
RND3	3.94945	0.959899	0.298957	3.21083	0.00132352	0.00360348
MAPK8IP1	47.9422	0.95974	0.2355	4.07533	4.59501e-05	0.000156155
SUCO	2922.8	0.959536	0.0391968	24.48	2.41529e-132	2.77163e-130
ATP1B4	120.787	0.95935	0.159953	5.9977	2.00137e-09	1.11078e-08
SLC7A5P2	54.9199	0.957824	0.219728	4.35914	1.30574e-05	4.79213e-05
ASIC4	8.78351	0.957723	0.323302	2.96232	0.00305331	0.00777038
CCL3L1	604.295	0.957134	0.0763265	12.54	4.51018e-36	9.6448e-35
CAMK2N2	30.5121	0.956401	0.26309	3.63527	0.000277693	0.000846587
DFNB31	136.493	0.955429	0.150524	6.34735	2.1905e-10	1.31229e-09
STAT5A	1326.32	0.95517	0.0534366	17.8748	1.85247e-71	9.03774e-70
SLC22A1	656.994	0.954983	0.147128	6.49081	8.53781e-11	5.30399e-10
TCEAL2	31.1226	0.954466	0.260271	3.6672	0.000245219	0.000753505
TTLL10	27.4395	0.954141	0.275728	3.46044	0.000539295	0.00157262
PARM1	72.8977	0.953971	0.195127	4.88898	1.01362e-06	4.25366e-06
FAM65B	945.506	0.952744	0.0635584	14.99	8.52994e-51	2.71475e-49
MDGA1	68.6057	0.952609	0.200306	4.75577	1.97689e-06	8.00533e-06
LOC102724889	14.7868	0.952389	0.311232	3.06006	0.00221294	0.00577697
MCAM	383.709	0.952185	0.0925979	10.283	8.40605e-25	1.21218e-23
CTNNA1	4081.38	0.952098	0.0332161	28.6638	1.07962e-180	2.09434e-178
GPR124	325.505	0.951978	0.10351	9.19698	3.68148e-20	4.18047e-19
ASGR1	145.542	0.951818	0.145277	6.55174	5.68723e-11	3.59338e-10
EPB41L1	400.035	0.951429	0.0986462	9.64486	5.16795e-22	6.50786e-21
AHNAK	75.3865	0.951182	0.207498	4.58406	4.56039e-06	1.76974e-05
MOBP	13.6921	0.949873	0.311935	3.0451	0.00232601	0.00605134
YPEL4	11.7179	0.94916	0.317511	2.98938	0.00279544	0.00716334
LYG1	66.2711	0.947753	0.204375	4.63733	3.52932e-06	1.38713e-05
WNT7B	12.1874	0.947585	0.316659	2.99244	0.00276753	0.00709628
TSHR	133.285	0.947309	0.151663	6.24615	4.207e-10	2.47127e-09
RNR1	20457.5	0.946254	0.0728266	12.9932	1.33644e-38	3.10218e-37
TNFRSF13C	23.6317	0.944713	0.282605	3.34288	0.000829148	0.00235711
KIF21A	948.199	0.94393	0.0657551	14.3552	9.87761e-47	2.84877e-45
RIN1	76.4192	0.943292	0.1917	4.92067	8.62481e-07	3.65993e-06
SAT1	551.382	0.942433	0.0803322	11.7317	8.76792e-32	1.63658e-30
WDR63	38.6992	0.941682	0.242427	3.88439	0.000102586	0.000332665
IFFO2	1624.96	0.941576	0.0523622	17.982	2.69622e-72	1.33136e-70
F3	1936.63	0.941555	0.0511474	18.4087	1.11938e-75	5.903e-74
COL12A1	12.9932	0.941513	0.317884	2.96181	0.00305837	0.00778204
INSRR	11.2322	0.941192	0.319222	2.9484	0.00319427	0.00810253
C19orf81	95.3703	0.941075	0.173279	5.43099	5.60426e-08	2.72584e-07
PROX1	304.619	0.940597	0.109238	8.61053	7.27222e-18	7.31938e-17
FRAS1	7.8718	0.938968	0.322916	2.90778	0.00364007	0.00913099
TRPM4	91.2648	0.936815	0.17586	5.32705	9.98192e-08	4.71192e-07
RTN4	5354.28	0.936799	0.0293508	31.9173	1.53518e-223	4.90505e-221
HABP4	263.353	0.936727	0.109265	8.57302	1.00805e-17	1.00712e-16
SPATS2L	397.851	0.936103	0.0924712	10.1232	4.36023e-24	6.09871e-23
PRSS57	3.28459	0.935323	0.287916	3.2486	0.00115976	0.00319659
FGD4	26.0248	0.935187	0.274907	3.40183	0.000669359	0.00192707
LOC102724024	37.505	0.934768	0.244896	3.817	0.000135084	0.00043169
TMEM38A	52.4393	0.934605	0.222482	4.20081	2.65965e-05	9.35038e-05
FAM160A1	7.42063	0.933965	0.322362	2.89726	0.00376441	0.00940815
MAP3K10	523.998	0.933684	0.0805186	11.5959	4.3239e-31	7.82866e-30
CHST14	428.13	0.933538	0.0902182	10.3476	4.29314e-25	6.24057e-24
CCDC64	3056.31	0.933464	0.0373398	24.9992	6.23617e-138	7.69836e-136
HPSE	495.307	0.933436	0.0835595	11.1709	5.65983e-29	9.53744e-28
AC003102.3	27.4614	0.933435	0.272087	3.43065	0.000602136	0.00174556
LOXHD1	3.2799	0.93168	0.287588	3.23963	0.00119685	0.00329213
KIAA1522	27.8409	0.931368	0.274911	3.38789	0.000704329	0.00202061
NIPA1	2473.34	0.930383	0.0491293	18.9374	5.60744e-80	3.08694e-78
PIWIL4	17.2177	0.930283	0.303557	3.0646	0.00217959	0.00570086
FOXD1	56.4285	0.930065	0.220434	4.21925	2.45115e-05	8.68105e-05
BAIAP2	560.255	0.930059	0.0785323	11.843	2.33898e-32	4.46819e-31
PERP	173.132	0.929929	0.13336	6.97308	3.10069e-12	2.15737e-11
CCL20	444.751	0.929915	0.0984378	9.44673	3.49591e-21	4.21345e-20
GNA14	11.5408	0.929701	0.318177	2.92197	0.00347828	0.008767
PAK1	2449.09	0.92943	0.039713	23.4036	3.92452e-121	3.87576e-119
ESPN	105.918	0.929038	0.166401	5.58313	2.36228e-08	1.1899e-07
FGF5	8.21817	0.927852	0.323323	2.86974	0.00410814	0.0101906
ADCY6	13.5639	0.927348	0.312508	2.96744	0.00300294	0.00765654
VCL	650.356	0.927252	0.0745342	12.4406	1.57286e-35	3.31134e-34
SPRED3	54.0707	0.927235	0.217963	4.25409	2.099e-05	7.49414e-05
ACVR2A	186.373	0.926705	0.132003	7.02034	2.21322e-12	1.55718e-11
C6orf164	12.2797	0.926084	0.319975	2.89424	0.00380076	0.00949462
ABCC2	43.8682	0.925775	0.235248	3.93531	8.3091e-05	0.000273005
CXCL3	332.062	0.925618	0.114931	8.05369	8.03371e-16	7.21263e-15
MCF2L2	76.4793	0.925376	0.188788	4.90167	9.50262e-07	4.00531e-06
ADAP2	5.59177	0.925299	0.31798	2.90992	0.00361516	0.00907462
COMMD3	1778.28	0.924954	0.046623	19.839	1.37121e-87	8.39992e-86
LGALS9	607.571	0.924379	0.0776452	11.9052	1.11254e-32	2.14797e-31
TSPAN5	1536.06	0.924177	0.0510049	18.1194	2.24168e-73	1.1415e-71
S100A10	699.024	0.92416	0.0701865	13.1672	1.35527e-39	3.22868e-38
FAM46A	655.551	0.921831	0.0732074	12.592	2.33529e-36	5.06031e-35
RHOV	139.57	0.920478	0.151532	6.07449	1.24382e-09	7.03994e-09
C1QL1	217.437	0.919283	0.122129	7.52717	5.18501e-14	4.13963e-13
ZNF385D	6.23308	0.919191	0.318934	2.88207	0.00395066	0.0098269
S100A2	8.57227	0.919133	0.323291	2.84305	0.00446841	0.0109962
HIC1	296.553	0.918644	0.107942	8.5105	1.73181e-17	1.71237e-16
LAT2	100.297	0.916975	0.171376	5.35068	8.76259e-08	4.16773e-07
LOC101928852	15.3906	0.916869	0.306488	2.99154	0.00277577	0.00711407
MAL	439.288	0.916117	0.089221	10.268	9.82664e-25	1.41328e-23
NPTXR	6.0785	0.915841	0.319725	2.86447	0.00417712	0.0103444
LINC00854	16.8243	0.915814	0.302656	3.02592	0.00247878	0.00641445
GPR132	8.59544	0.9158	0.323293	2.83272	0.00461534	0.0113332
FAM107B	1835.18	0.915794	0.0457945	19.9979	5.74582e-89	3.64312e-87
PTRF	6.21173	0.91575	0.314209	2.91446	0.00356303	0.00895842
SSFA2	6557.92	0.915635	0.0291641	31.396	2.29428e-216	6.67593e-214
LOC101927060	56.5025	0.915476	0.213183	4.29433	1.75224e-05	6.3156e-05
SIRPD	3.77714	0.914055	0.29605	3.0875	0.00201844	0.0053075
PACSIN1	32.8953	0.913817	0.258925	3.52927	0.000416709	0.00123752
COL5A2	27.9529	0.913496	0.268204	3.40597	0.000659287	0.00189941
PALM	111.035	0.912296	0.161722	5.64113	1.68937e-08	8.62957e-08
NSMF	213.698	0.911562	0.124104	7.34518	2.0549e-13	1.56543e-12
MIR4523	18.9511	0.911253	0.301043	3.02698	0.00247007	0.00639393
SAMD4A	14.0559	0.910832	0.312911	2.91083	0.00360467	0.00905334
C1orf53	31.2903	0.910554	0.265775	3.42603	0.000612463	0.00177266
KIAA1211	90.6543	0.909355	0.185888	4.89197	9.98338e-07	4.19384e-06
PYGB	2141.86	0.90913	0.0454185	20.0167	3.93798e-89	2.51645e-87
ZBTB10	781.891	0.90901	0.0693259	13.1121	2.80623e-39	6.62718e-38
ASPDH	23.6328	0.908596	0.283485	3.20509	0.00135019	0.00367119
ZNF460	129.405	0.907902	0.170227	5.33349	9.63433e-08	4.55576e-07
PPM1L	170.397	0.907766	0.133125	6.81891	9.17353e-12	6.16424e-11
VASP	5924.03	0.907661	0.0295841	30.6807	1.03028e-206	2.66482e-204
KIF25	83.0015	0.907611	0.187805	4.83273	1.34674e-06	5.56558e-06
ACRC	277.659	0.907405	0.113233	8.01361	1.11385e-15	9.92899e-15
SH3RF1	339.462	0.906566	0.0978548	9.2644	1.96173e-20	2.26231e-19
CTIF	112.316	0.905986	0.16558	5.4716	4.45983e-08	2.18894e-07
ASAP2	96.8132	0.905231	0.173816	5.208	1.90892e-07	8.75846e-07
HLA-B-3	24.0238	0.904656	0.285333	3.17052	0.00152164	0.00409844
FRMD6	282.708	0.904077	0.106511	8.48808	2.10076e-17	2.06714e-16
ZNF844	9.0297	0.904071	0.323261	2.79673	0.00516233	0.0125291
LOC100505622	32.0825	0.9032	0.256784	3.51736	0.000435867	0.00128971
HLA-C-5	495.123	0.902384	0.0860812	10.4829	1.03476e-25	1.53705e-24
MATN2	5.57864	0.901189	0.316713	2.84544	0.00443499	0.0109283
CEBPB	670.943	0.900493	0.0772024	11.664	1.94571e-31	3.55441e-30
DNMT3B	141.212	0.900308	0.149423	6.02523	1.68867e-09	9.43004e-09
ZC2HC1C	10.8623	0.899798	0.320373	2.8086	0.0049758	0.0121415
TRIM73	7.92317	0.899083	0.323369	2.78036	0.00542986	0.0131139
MTURN	303.962	0.898659	0.103449	8.68694	3.72328e-18	3.7943e-17
STK38L	2762.95	0.898187	0.0433583	20.7154	2.51359e-95	1.83672e-93
LRRC8C	2313.29	0.897768	0.0450748	19.9173	2.88078e-88	1.81244e-86
CHRM4	12.9137	0.89772	0.315633	2.84418	0.00445254	0.0109665
SHC4	440.03	0.895968	0.0903342	9.91837	3.46376e-23	4.6264e-22
LOC102723998	7.6095	0.895437	0.322915	2.77298	0.00555461	0.0133954
LOC541473	12.0685	0.895252	0.319268	2.80407	0.00504614	0.0122944
HMGA1	20134.5	0.895001	0.0249458	35.8779	6.76011e-282	3.44238e-279
TNS3	691.361	0.894964	0.13147	6.80736	9.94066e-12	6.65775e-11
BAG3	1098.95	0.894892	0.058109	15.4002	1.63081e-53	5.63008e-52
SPAG9	4165.42	0.894416	0.0415265	21.5384	6.79645e-103	5.40235e-101
RAB30-AS1	50.0109	0.894179	0.224998	3.97417	7.06262e-05	0.000233676
PPIF	11344.3	0.893973	0.0266571	33.536	1.44152e-246	5.46268e-244
TMEM145	22.8166	0.893638	0.282179	3.16692	0.00154065	0.00414067
PCOLCE2	147.273	0.893224	0.151049	5.91347	3.34979e-09	1.82558e-08
PLIN2	309.784	0.892389	0.105311	8.4738	2.37508e-17	2.33004e-16
FGF17	15.192	0.892386	0.30839	2.89369	0.00380741	0.00950832
ACSL6	289.937	0.891102	0.106487	8.36814	5.85364e-17	5.62412e-16
LOC102724217	40.9877	0.890364	0.238473	3.73361	0.000188755	0.00059081
PPM1N	29.476	0.890162	0.268022	3.32123	0.000896229	0.00253586
AC104653.1	33.9321	0.889843	0.254149	3.50127	0.000463051	0.0013647
EML6	190.367	0.889465	0.14532	6.12074	9.31406e-10	5.32723e-09
FRMD5	19.5068	0.88946	0.294582	3.0194	0.00253277	0.00654896
LMNA	16.122	0.889188	0.307637	2.89038	0.00384774	0.00959874
MFGE8	888.738	0.88853	0.0622651	14.2701	3.36071e-46	9.57391e-45
AMOTL1	196.36	0.888526	0.127341	6.97754	3.00392e-12	2.09272e-11
NHSL2	193.225	0.887769	0.126035	7.04381	1.87055e-12	1.3264e-11
CITED4	11.214	0.887466	0.31874	2.78429	0.00536448	0.0129691
FURIN	3618.44	0.887179	0.0357545	24.813	6.48375e-136	7.71187e-134
IFRD1	3846.85	0.886895	0.0367669	24.1221	1.46622e-128	1.61433e-126
SPAG4	40.5992	0.88648	0.239186	3.70623	0.000210364	0.0006538
GSC	186.317	0.885004	0.131619	6.724	1.76802e-11	1.16263e-10
ANXA2P2	193.64	0.884447	0.130098	6.79829	1.05869e-11	7.07313e-11
PDLIM4	12.156	0.884172	0.317352	2.78609	0.00533481	0.0129054
RFX8	285.406	0.884157	0.106998	8.26334	1.41657e-16	1.3289e-15
ATHL1	26086.4	0.884095	0.0980424	9.01748	1.92468e-19	2.10065e-18
PODXL2	17.9125	0.882028	0.304307	2.89848	0.00374978	0.00937732
KIAA0754	383.124	0.881978	0.0994242	8.87086	7.25837e-19	7.70021e-18
BEX2	540.101	0.881372	0.0780584	11.2912	1.45062e-29	2.49344e-28
EPHX3	9.76454	0.881136	0.321773	2.73838	0.00617422	0.0147369
NDRG4	13.3594	0.880754	0.316334	2.78425	0.00536511	0.0129691
LOC101927910	96.6063	0.88072	0.170134	5.17663	2.25926e-07	1.02863e-06
GRIP1	44.697	0.879977	0.232486	3.78508	0.00015366	0.000487139
NETO2	5840.51	0.879541	0.0335714	26.1991	2.7176e-151	3.75282e-149
SLC7A5P1	107.572	0.878222	0.163515	5.3709	7.8344e-08	3.74484e-07
KDM6B	14240.3	0.877452	0.0304036	28.8602	3.77544e-183	7.6901e-181
TEAD3	157.469	0.877411	0.137961	6.35987	2.01926e-10	1.21417e-09
ABCA10	4.77265	0.877169	0.305817	2.86828	0.00412713	0.0102299
PERM1	6.43896	0.876364	0.320787	2.73192	0.00629666	0.0150006
TMEM159	324.256	0.876198	0.1022	8.57334	1.00525e-17	1.00494e-16
SPOCK2	77.4379	0.875557	0.189959	4.60919	4.04242e-06	1.57738e-05
SSPO	8.24423	0.875361	0.323334	2.7073	0.00678336	0.0160942
HIST2H2BE	46.5644	0.875242	0.228452	3.83119	0.000127527	0.000409147
C1orf51	14.5395	0.873681	0.310262	2.81595	0.00486333	0.0118884
EGR2	5438.7	0.873154	0.0357917	24.3954	1.91289e-131	2.16462e-129
ASIC3	142.92	0.87272	0.144701	6.03121	1.62741e-09	9.10357e-09
MCHR1	8.25774	0.872602	0.323339	2.69872	0.0069607	0.0164383
EML1	38.6188	0.872449	0.243576	3.58183	0.000341192	0.00102465
CDH26	8.94026	0.87212	0.323245	2.69801	0.0069755	0.0164685
ABCG4	32.0587	0.871326	0.264153	3.29857	0.00097179	0.00272647
TMEM132D	17.3222	0.871303	0.301757	2.88744	0.00388393	0.00967569
HCAR3	31.6273	0.870812	0.25904	3.36169	0.000774672	0.00220957
BAI1	55.288	0.870697	0.217598	4.0014	6.29685e-05	0.000209659
MXD4	369.538	0.8706	0.0935886	9.30241	1.37293e-20	1.60028e-19
CLSTN3	1165.77	0.8702	0.0545671	15.9473	2.97371e-57	1.12428e-55
SLC27A2	850.803	0.870128	0.0664742	13.0897	3.76999e-39	8.86465e-38
OVOL3	13.3531	0.869781	0.317331	2.74093	0.00612652	0.0146316
ABHD2	2368.8	0.869595	0.0401223	21.6736	3.64076e-104	2.95155e-102
RXFP4	8.02107	0.868829	0.322733	2.6921	0.00710043	0.0167392
MAP4K3	352.023	0.86838	0.0992364	8.75061	2.12197e-18	2.20239e-17
LOC101927848	204.551	0.868275	0.122875	7.06634	1.59074e-12	1.13589e-11
EXT1	368.857	0.868241	0.0936677	9.26937	1.87245e-20	2.16395e-19
FZD9	15.5505	0.867681	0.308587	2.81179	0.00492665	0.0120323
OTUD7B	584.765	0.867392	0.0774763	11.1956	4.28595e-29	7.23726e-28
CDH4	449.434	0.867097	0.0852119	10.1758	2.54381e-24	3.58886e-23
TFPI	27.526	0.866893	0.27274	3.17846	0.00148061	0.0039991
CD6	1682.89	0.866678	0.0506038	17.1267	9.37948e-66	4.16454e-64
LRRC17	5.11432	0.866059	0.310706	2.78739	0.00531347	0.0128576
STON2	64.9209	0.864495	0.210746	4.10207	4.09471e-05	0.000140234
KIAA1652	14.5547	0.863789	0.3113	2.77478	0.00552391	0.0133272
PBX4	119.334	0.863561	0.161832	5.33616	9.49353e-08	4.4957e-07
TNFSF14	8143.54	0.862959	0.0277854	31.0581	8.87914e-212	2.41143e-209
TPST2	1601.97	0.86271	0.0490876	17.5749	3.8352e-69	1.79582e-67
CGA	7.27353	0.862629	0.320143	2.69451	0.00704915	0.0166304
NPAS2	239.882	0.86234	0.116967	7.37248	1.67481e-13	1.28187e-12
C12orf68	83.8097	0.862236	0.180969	4.76454	1.89286e-06	7.67839e-06
LBX2	39.0472	0.859763	0.243322	3.53344	0.000410186	0.00122037
TEAD1	380.288	0.857962	0.0973656	8.81175	1.23202e-18	1.29105e-17
RP11-24J23.2	264.143	0.856969	0.111999	7.65159	1.98511e-14	1.62468e-13
RELL1	320.886	0.856832	0.101991	8.40104	4.42542e-17	4.26447e-16
KRT1	98.6632	0.856346	0.176749	4.84497	1.26629e-06	5.25446e-06
NEFH	8.08635	0.854963	0.323353	2.64406	0.00819181	0.0190558
LOC102723892	6.44931	0.854827	0.320037	2.67102	0.007562	0.0177044
DEGS2	26.3475	0.854477	0.277346	3.0809	0.00206375	0.00542137
RN7SL2	306.334	0.854421	0.217831	3.9224	8.76721e-05	0.000287102
LOC102724463	5.76294	0.854346	0.318379	2.68343	0.00728722	0.0171325
TRIM9	635.486	0.853783	0.0785018	10.876	1.50065e-27	2.38567e-26
GPR87	19.0088	0.853577	0.294864	2.89482	0.00379378	0.00948008
ANTXR2	3909.27	0.853111	0.0363333	23.4801	6.51078e-122	6.54896e-120
RILPL1	52.1385	0.853086	0.221857	3.84521	0.000120448	0.000387349
GSN	665.439	0.852832	0.071606	11.9101	1.04891e-32	2.02752e-31
DAAM1	839.777	0.852818	0.0705925	12.0809	1.33321e-33	2.65258e-32
GCK	9.5663	0.852641	0.322416	2.64453	0.00818034	0.0190318
ANKRD36B	89.9513	0.852627	0.176772	4.82332	1.41189e-06	5.81713e-06
IFITM5	97.2665	0.852572	0.171033	4.98484	6.20124e-07	2.6768e-06
LOC101927803	30.2175	0.852435	0.261705	3.25724	0.00112501	0.00310713
TVP23C	60.8599	0.852105	0.208866	4.07967	4.51004e-05	0.000153458
TAC3	42.6853	0.851792	0.241622	3.52531	0.000422982	0.00125523
MYH9	35891	0.851213	0.025386	33.5308	1.71424e-246	6.34853e-244
MICALL2	165.994	0.850737	0.136854	6.2164	5.08681e-10	2.97415e-09
ST20	225.689	0.85049	0.118645	7.16839	7.58833e-13	5.55239e-12
PITX1	137.298	0.848588	0.147474	5.75414	8.70827e-09	4.5819e-08
HNRNPUL2-BSCL2	7.07226	0.848559	0.322838	2.62844	0.00857782	0.019863
C17orf72	235.125	0.84807	0.116392	7.28634	3.18485e-13	2.39488e-12
CYP4F12	36.5931	0.847758	0.252536	3.35698	0.000787997	0.00224561
PRRT3-AS1	12.3288	0.847744	0.31681	2.67588	0.00745335	0.0174727
AKR1C3	21.104	0.847605	0.299293	2.83203	0.00462541	0.0113562
LOXL3	67.0234	0.846145	0.200794	4.21399	2.50896e-05	8.86844e-05
LOC101927260	143.514	0.845446	0.143505	5.8914	3.82943e-09	2.07517e-08
SLC9A5	389.788	0.845245	0.0910383	9.2845	1.62464e-20	1.88289e-19
PDZD7	28.7157	0.84506	0.26777	3.15592	0.0015999	0.00428438
ITM2A	26875.9	0.844852	0.0197252	42.8311	0	0
GNRH2	16.4752	0.844545	0.303225	2.78521	0.00534931	0.0129366
STK10	1288.47	0.844358	0.0523648	16.1245	1.71574e-58	6.64084e-57
RP11-1191J2.2	36.2034	0.84346	0.247485	3.40813	0.000654101	0.00188514
ITPRIP	884.009	0.84297	0.0652863	12.9119	3.85695e-38	8.81474e-37
CRYM	7.71105	0.842198	0.3228	2.60904	0.00907959	0.020909
CHSY1	3985.84	0.841808	0.0333625	25.2322	1.77731e-140	2.22779e-138
WWC3	279.72	0.841357	0.106015	7.9362	2.08461e-15	1.82726e-14
PLEKHH2	58.0711	0.841007	0.213428	3.94048	8.13185e-05	0.000267478
TNFRSF19	6.07401	0.839896	0.315881	2.6589	0.00783968	0.0183046
PFKP	11609.6	0.838668	0.0247995	33.818	1.07316e-250	4.37178e-248
KCNJ15	7.57587	0.838045	0.323166	2.59323	0.0095078	0.0218026
PPARD	733.944	0.83766	0.0687697	12.1807	3.94033e-34	7.87823e-33
IRAK2	169.363	0.837434	0.134049	6.24721	4.17837e-10	2.45534e-09
FBLN1	8.34885	0.836877	0.321078	2.60646	0.00914845	0.0210616
CDC42EP4	66.3712	0.836271	0.200291	4.17527	2.97627e-05	0.00010394
MYH15	99.3224	0.836048	0.167621	4.98773	6.10922e-07	2.63918e-06
PRR15	3.27414	0.836004	0.290527	2.87754	0.00400786	0.00996007
NPIPB6	8.09686	0.835463	0.323365	2.58365	0.00977604	0.0223517
CHMP3	130.916	0.835125	0.151604	5.50861	3.61673e-08	1.78861e-07
LOC101927202	11.2361	0.834461	0.318043	2.62374	0.00869707	0.0200974
MN1	9.9465	0.834199	0.321512	2.59461	0.00946979	0.0217247
COLQ	40.3903	0.833913	0.240181	3.47202	0.000516559	0.00151092
ANXA3	234.211	0.833815	0.117789	7.07891	1.45292e-12	1.04022e-11
IL7R	130.124	0.83357	0.153589	5.42728	5.72185e-08	2.78072e-07
MIR503HG	107.841	0.833357	0.174059	4.78778	1.68634e-06	6.87488e-06
CD34	200.262	0.83328	0.125689	6.62971	3.36346e-11	2.15608e-10
IFITM10	9.88196	0.833142	0.321834	2.58873	0.00963303	0.0220557
BSN	231.865	0.832954	0.119111	6.99307	2.68936e-12	1.88082e-11
HBP1	1258.44	0.832559	0.0546695	15.2289	2.27245e-52	7.6036e-51
TCTE1	25.3505	0.832262	0.27459	3.03093	0.00243804	0.00632006
FAIM2	8.94395	0.832216	0.322794	2.57816	0.00993277	0.0226641
ICOSLG	10.1231	0.831668	0.322195	2.58125	0.00984422	0.0224887
DFNA5	347.455	0.830659	0.101146	8.21248	2.16661e-16	2.01627e-15
C15orf37	129.173	0.829752	0.156209	5.31179	1.08552e-07	5.10983e-07
SCARF2	11.2404	0.829193	0.318658	2.60214	0.0092644	0.0212954
LOC101928485	71.5325	0.828623	0.204146	4.05897	4.92902e-05	0.000166601
RAP1GAP2	100.905	0.827704	0.185372	4.46509	8.00343e-06	3.01261e-05
ANKRD9	97.9859	0.827481	0.179825	4.6016	4.19261e-06	1.63402e-05
CSRP2	65.574	0.826848	0.20373	4.05855	4.93788e-05	0.000166866
RNASEK-C17orf49	14.0015	0.826692	0.311566	2.65334	0.0079699	0.0185847
PPP2R5B	554.59	0.826679	0.0773828	10.683	1.2228e-26	1.88331e-25
IGLON5	21.3179	0.825709	0.294187	2.80675	0.00500444	0.0122022
LOC101929079	3.78723	0.824952	0.298338	2.76516	0.00568948	0.0136821
SPTB	215.721	0.824553	0.12204	6.7564	1.41465e-11	9.36298e-11
ZNF703	36.4271	0.824511	0.253609	3.25112	0.00114953	0.00316947
TRIM74	17.693	0.824386	0.297968	2.76669	0.00566279	0.013622
[truncated: 745 more rows]
