# Supplementary material for: TRIM24 controls induction of latent HIV-1 by stimulating transcriptional elongation
Source: Commun Biol. 2023 Jan 23;6:86. doi: 10.1038/s42003-023-04484-z (PMC9870992; doi:10.1038/s42003-023-04484-z)
Supplement: Supplementary file 5 — Supplementary Data 3 [file 42003_2023_4484_MOESM5_ESM.xlsx]

## Sheet: RTK3 (TRIM24 knockout) GO
Category	Term	Count	%	PValue	Genes	List Total	Pop Hits	Pop Total	Fold Enrichment	Bonferroni	Benjamini	FDR
GOTERM_BP_FAT	GO:0035556~intracellular signal transduction	172	21.7997	7.3739e-12	RAB3B, CSF2, KDM1A, DGKA, CCL4L2, WWC2, RASEF, EPS8, PREX2, RASSF2, RGS3, CDH2, CREB3L1, WWC3, TNFSF10, MAP3K8, CHAC1, PDE8A, IL6R, SOX4, MAP3K4, MEF2C, TLE1, UNC13A, CD300A, ANK2, ATP1B1, MID1, ADCYAP1, DOK3, IL23A, MAPKAPK2, PRKCQ, TRIB1, TRIB2, ATF3, BRSK1, SPTBN5, SHC2, CCL3L1, PDGFB, ITPR1, ARHGAP18, RASAL1, LPAR4, FOXO1, BCL2L11, INPP5A, SOCS1, ZMAT1, FLRT2, IRAK2, CD19, PDGFC, NLRP3, ZNF26…	655	2657	16650	1.64555	4.82104e-08	4.82105e-08	4.46932e-08
GOTERM_BP_FAT	GO:0009966~regulation of signal transduction	172	21.7997	6.53066e-11	FOXA1, CSF2, KDM1A, CCL4L2, GFI1, WWC2, SLA, EPS8, PREX2, RASSF2, RGS3, CDH2, RUSC1, PLAU, CREB3L1, WWC3, TNFSF10, GRB10, MAP3K8, CHAC1, PDE8A, IL6R, SOX4, MAP3K4, CCBE1, MEF2C, TLE1, CD300A, IL1R1, IL1R2, MID1, STX1B, ADCYAP1, IL23A, MAPKAPK2, PRKCQ, TRIB1, TRIB2, ATF3, SHC2, CCL3L1, PDGFB, ITPR1, DTX1, ARHGAP18, RASAL1, LPAR4, GATA2, FOXO1, BCL2L11, SOCS1, FLRT2, IRAK2, CD19, PDGFC, NLRP3, IL36…	655	2728	16650	1.60272	4.26975e-07	1.22973e-07	1.14001e-07
GOTERM_BP_FAT	GO:0023051~regulation of signaling	188	23.8276	6.55e-11	FOXA1, RAB3B, CSF2, KDM1A, CCL4L2, GFI1, WWC2, SLA, SLC8A2, EPS8, PREX2, NPPC, RASSF2, RGS3, CDH2, RUSC1, PLAU, CREB3L1, WWC3, TNFSF10, GRB10, MAP3K8, CHAC1, PDE8A, IL6R, SOX4, MAP3K4, CCBE1, MEF2C, TLE1, UNC13A, CD300A, IL1R1, IL1R2, ANK2, ATP1B1, MID1, SHISA7, STX1B, ADCYAP1, IL23A, MAPKAPK2, PRKCQ, TRIB1, TRIB2, ATF3, CHRNA3, SHC2, CCL3L1, PDGFB, ITPR1, DTX1, ARHGAP18, RASAL1, LPAR4, GATA2, FO…	655	3070	16650	1.55666	4.28239e-07	1.22973e-07	1.14001e-07
GOTERM_BP_FAT	GO:0051240~positive regulation of multicellular organismal process	107	13.5615	9.36036e-11	FOXA1, CSF2, KDM1A, NPPC, CDH4, IL36B, CREB3L1, LIPG, MYB, C3AR1, IL6R, RAG1, CCBE1, MEF2C, UNC13A, ADCYAP1, BIN1, IL23A, PARD3, MAPKAPK2, PRKCQ, TRIB1, ZFPM1, PHLDB2, EBI3, PDGFB, NEDD4L, RASAL1, GATA2, LY9, FLRT2, NLRP3, SLAMF1, JUN, BCL11A, EPHX2, LIF, HMGA2, INHBA, L1CAM, NFATC4, SELP, DAB2, BAMBI, PLXNB2, AMOTL1, CD24, RYR2, DOCK5, BMP10, TENM4, IL26, PLEK, HTR2B, ADM, ATP2A1, DBH, GLI3, SPN…	655	1431	16650	1.90072	6.1198e-07	1.22973e-07	1.14001e-07
GOTERM_BP_FAT	GO:0010646~regulation of cell communication	185	23.4474	1.01463e-10	FOXA1, RAB3B, CSF2, KDM1A, CCL4L2, GFI1, WWC2, SLA, SLC8A2, EPS8, PREX2, RASSF2, RGS3, CDH2, RUSC1, PLAU, CREB3L1, WWC3, TNFSF10, GRB10, MAP3K8, CHAC1, PDE8A, IL6R, SOX4, MAP3K4, CCBE1, MEF2C, TLE1, UNC13A, CD300A, IL1R1, IL1R2, ANK2, MID1, SHISA7, STX1B, ADCYAP1, IL23A, MAPKAPK2, PRKCQ, TRIB1, TRIB2, ATF3, CHRNA3, SHC2, CCL3L1, PDGFB, ITPR1, DTX1, ARHGAP18, RASAL1, LPAR4, GATA2, FOXO1, BCL2L11, …	655	3020	16650	1.55718	6.63366e-07	1.22973e-07	1.14001e-07
GOTERM_BP_FAT	GO:0042127~regulation of cell proliferation	113	14.3219	1.21048e-10	CSF2, KDM1A, FGFRL1, NPPC, CCND2, CDH2, PLAU, FTH1, IL6R, SOX4, BRICD5, MEF2C, CD300A, RUNX3, ADCYAP1, IL23A, TXNIP, PRKCQ, TRIB1, ATF3, CCL3L1, EBI3, PDGFB, GATA2, FOXO1, PDGFC, CGA, ZNF268, SLAMF1, HLA-DRB5, JUN, JUP, TNFRSF9, PTCH1, IL31RA, LIF, IGF2, HMGA2, TNFRSF10A, INHBA, FOSL2, TNFRSF10D, CXCL10, BAMBI, ID1, CD24, ITK, RARG, BMP10, CXCL9, CDKN1B, IL26, HTR2B, FASLG, NRARP, ADM, PTPRJ, DBH…	655	1552	16650	1.8508	7.9141e-07	1.22973e-07	1.14001e-07
GOTERM_BP_FAT	GO:0001775~cell activation	78	9.88593	1.31663e-10	PRR5, ITK, CSF2, DGKA, PLEK, PRF1, RORC, NRARP, IKZF1, GLI3, SPN, PPP3CA, CCND3, CASP8, IL36B, SIT1, MYB, MAP3K8, CCR7, SOX4, RAG1, EOMES, MEF2C, ANXA1, CD300A, IL13, RHOG, AP3B1, GAB2, ADRA2B, RHOB, F5, LAT2, FGR, MMP14, TMIGD2, ADORA2A, ASTL, IL23A, XCL1, CD48, PRKCQ, ZFPM1, ZP4, HDAC4, SATB1, EBI3, LEF1, PDGFB, ITPR1, DTX1, CD1C, GATA2, HDAC9, THBS1, LY9, APOLD1, IL1RL2, SLAMF7, NLRP3, PAG1, S…	655	910	16650	2.17884	8.60813e-07	1.22973e-07	1.14001e-07
GOTERM_BP_FAT	GO:0007166~cell surface receptor signaling pathway	167	21.166	2.56872e-10	FOXA1, CSF2, NCF2, CCL4L2, GFI1, FGFRL1, EPS8, NPPC, RASSF2, IL36B, CDH2, TNFSF10, GRB10, C3AR1, PLXNC1, CHAC1, IL6R, SOX4, CCBE1, MEF2C, TLE1, CD300A, IL1R1, IL1R2, ARID5B, MID1, CLEC4A, STX1B, COL4A1, PARD3, MAPKAPK2, TXNIP, PRKCQ, TRIB1, ATF3, GRIA2, CHRNA3, SHC2, CCL3L1, GPR87, EBI3, PDGFB, DTX1, GATA2, FOXO1, BCL2L11, SOCS1, FLRT2, IRAK2, CD19, PDGFC, IL36RN, ATP6V0A4, PAG1, NTSR1, PLXNA4, S…	655	2669	16650	1.59053	1.67943e-06	2.09928e-07	1.94612e-07
GOTERM_BP_FAT	GO:0007155~cell adhesion	119	15.0824	3.7246e-10	FOXA1, RORC, CLDN1, FGFRL1, RPL6, CCND3, CDH4, IL36B, CDH2, SIT1, PLAU, MYB, HMCN2, MAP3K8, PLXNC1, SOX4, RAG1, TECTA, EOMES, CD300A, ATP1B1, CLEC4A, ASTL, IL23A, NINJ1, FSCN1, PRKCQ, ZFPM1, PHLDB2, COL17A1, EBI3, DTX1, ARHGAP18, PCDH12, CD1C, NID1, LY9, PCDH18, BCL2L11, FLRT2, NLRP3, SLAMF7, PAG1, SLAMF1, VASP, HLA-DRB5, JUP, SIGLEC12, MCAM, IGF2, L1CAM, SELP, CAMSAP3, SDK1, PPFIBP1, EHD4, PCDHB…	655	1699	16650	1.78044	2.43514e-06	2.70572e-07	2.50831e-07
GOTERM_BP_FAT	GO:0022610~biological adhesion	119	15.0824	4.6547e-10	FOXA1, RORC, CLDN1, FGFRL1, RPL6, CCND3, CDH4, IL36B, CDH2, SIT1, PLAU, MYB, HMCN2, MAP3K8, PLXNC1, SOX4, RAG1, TECTA, EOMES, CD300A, ATP1B1, CLEC4A, ASTL, IL23A, NINJ1, FSCN1, PRKCQ, ZFPM1, PHLDB2, COL17A1, EBI3, DTX1, ARHGAP18, PCDH12, CD1C, NID1, LY9, PCDH18, BCL2L11, FLRT2, NLRP3, SLAMF7, PAG1, SLAMF1, VASP, HLA-DRB5, JUP, SIGLEC12, MCAM, IGF2, L1CAM, SELP, CAMSAP3, SDK1, PPFIBP1, EHD4, PCDHB…	655	1705	16650	1.77417	3.04324e-06	2.84878e-07	2.64094e-07
GOTERM_BP_FAT	GO:0040011~locomotion	110	13.9417	4.793e-10	CCL4L2, EPS8, CDH4, CDH2, PLAU, C3AR1, PLXNC1, IL6R, CCBE1, MEF2C, CD300A, IL1R1, ARID5B, ATP1B1, IL23A, FSCN1, PRKCQ, TRIB1, PHLDB2, SPTBN5, CCL3L1, PDGFB, STC1, ARHGAP18, GATA2, CACNA1I, STRIP2, FLRT2, PDGFC, CGA, ZNF268, PLTP, PLXNA4, VASP, STARD13, JUN, JUP, DNAH17, MCAM, ARHGEF39, L1CAM, SELP, CXCL10, DAB2, EFNA3, EFNA2, BAMBI, ID1, LHX6, PLXNB2, FAT2, AMOTL1, CD24, FGF13, DOCK5, BMP10, CXCL…	655	1530	16650	1.82757	3.13366e-06	2.84878e-07	2.64094e-07
GOTERM_BP_FAT	GO:0002521~leukocyte differentiation	50	6.33714	5.966e-10	ITK, CSF2, KDM1A, RORC, NRARP, IKZF1, GLI3, SPN, RASSF2, CASP8, IL36B, MYB, CCR7, SOX4, RAG1, EOMES, MEF2C, ANXA1, AP3B1, GAB2, CBFA2T3, MMP14, IL23A, PPARG, TRIB1, ZFPM1, HDAC4, ZBTB46, CEBPE, SATB1, LEF1, DTX1, GATA2, HDAC9, LY9, IL1RL2, NLRP3, SLAMF1, JUN, PLCL2, LIF, IL31RA, INHBA, TMEM64, TSHR, BATF, VEGFA, EFNA2, CLCF1, F2RL1	655	474	16650	2.68142	3.90056e-06	3.25047e-07	3.01333e-07
GOTERM_BP_FAT	GO:0016477~cell migration	91	11.5336	8.5829e-10	DOCK5, BMP10, CXCL9, CCL4L2, HTR2B, PTPRJ, DBH, CXCL3, PTPRF, GLI3, EPS8, SPN, EPB41L4B, CDH2, PLAU, MDK, SIX3, C3AR1, CCR7, IL6R, CCBE1, MEF2C, ANXA1, CD300A, IL1R1, PDE4D, RHOG, ARID5B, NAV1, PARP9, ATP1B1, RHOB, FGR, MMP14, ZEB2, IL23A, GCSAML, XCL2, FSCN1, XCL1, CD48, ITGA6, PRKCQ, TRIB1, PHLDB2, HDAC4, LAMA5, CCL3L1, LEF1, PDGFB, CXCR4, STC1, RETN, GATA2, PTGS2, HDAC9, THBS1, STRIP2, FLRT2, …	655	1184	16650	1.95372	5.61148e-06	4.29526e-07	3.98189e-07
GOTERM_BP_FAT	GO:0065009~regulation of molecular function	174	22.0532	9.19756e-10	FOXA1, CSF2, KDM1A, DENND5B, CCL4L2, GFI1, PREX2, CCND3, RASSF2, RGS3, CCND2, PLAU, TNFSF10, PIM1, MAP3K8, IL6R, MAP3K4, RAG1, SPINK2, MEF2C, CD300A, ARID5B, ANK2, ATP1B1, MYL4, ADCYAP1, PPP1R3F, IL23A, MAPKAPK2, TXNIP, PRKCQ, TRIB1, TRIB2, ZFPM1, PIF1, CHRNA3, SPTBN5, SHC2, PARM1, CCL3L1, GPR87, PDGFB, NEDD4L, ARHGAP18, RASAL1, FBXO43, BCL2L11, SOCS1, FLRT2, IRAK2, PDGFC, NLRP3, ZNF268, EVI5, NT…	655	2863	16650	1.5449	6.01335e-06	4.29526e-07	3.98189e-07
GOTERM_BP_FAT	GO:0006928~movement of cell or subcellular component	122	15.4626	1.32124e-09	CCL4L2, DNHD1, EPS8, CDH4, CDH2, PLAU, C3AR1, PLXNC1, IL6R, CCBE1, MEF2C, CD300A, IL1R1, ARID5B, ANK2, MYO7A, ATP1B1, MYL4, IL23A, ARMC4, FSCN1, PRKCQ, KIF20A, TRIB1, PHLDB2, SPTBN5, CCL3L1, PDGFB, NEDD4L, STC1, ARHGAP18, GATA2, CACNA1I, STRIP2, FLRT2, PDGFC, CGA, ZNF268, PLTP, PLXNA4, VASP, STARD13, JUN, JUP, DNAH17, MCAM, ARHGEF39, L1CAM, SELP, ICK, CXCL10, DAB2, EFNA3, EFNA2, BAMBI, ID1, LHX6,…	655	1795	16650	1.7277	8.63822e-06	5.75884e-07	5.33869e-07
GOTERM_BP_FAT	GO:0051674~localization of cell	98	12.4208	1.53193e-09	CCL4L2, EPS8, CDH2, PLAU, C3AR1, PLXNC1, IL6R, CCBE1, MEF2C, CD300A, IL1R1, ARID5B, ATP1B1, IL23A, FSCN1, PRKCQ, TRIB1, PHLDB2, CCL3L1, PDGFB, STC1, GATA2, CACNA1I, STRIP2, FLRT2, PDGFC, CGA, ZNF268, PLTP, PLXNA4, STARD13, JUN, JUP, DNAH17, MCAM, ARHGEF39, L1CAM, SELP, CXCL10, DAB2, BAMBI, ID1, LHX6, PLXNB2, FAT2, AMOTL1, CD24, FGF13, DOCK5, BMP10, CXCL9, HTR2B, PTPRJ, DBH, CXCL3, PTPRF, GLI3, SP…	655	1330	16650	1.87304	1.00157e-05	5.89164e-07	5.4618e-07
GOTERM_BP_FAT	GO:0048870~cell motility	98	12.4208	1.53193e-09	CCL4L2, EPS8, CDH2, PLAU, C3AR1, PLXNC1, IL6R, CCBE1, MEF2C, CD300A, IL1R1, ARID5B, ATP1B1, IL23A, FSCN1, PRKCQ, TRIB1, PHLDB2, CCL3L1, PDGFB, STC1, GATA2, CACNA1I, STRIP2, FLRT2, PDGFC, CGA, ZNF268, PLTP, PLXNA4, STARD13, JUN, JUP, DNAH17, MCAM, ARHGEF39, L1CAM, SELP, CXCL10, DAB2, BAMBI, ID1, LHX6, PLXNB2, FAT2, AMOTL1, CD24, FGF13, DOCK5, BMP10, CXCL9, HTR2B, PTPRJ, DBH, CXCL3, PTPRF, GLI3, SP…	655	1330	16650	1.87304	1.00157e-05	5.89164e-07	5.4618e-07
GOTERM_BP_FAT	GO:0051241~negative regulation of multicellular organismal process	81	10.2662	1.76163e-09	FOXA1, DOCK5, RARG, BMP10, CDKN1B, KDM1A, GFI1, WWC2, NRARP, ADM, FASLG, ATP2A1, RORB, GLI3, NPPC, PPP3CA, PLAU, SIX3, STAB1, WWC3, DACT3, IL6R, SRGN, MEF2C, ANXA1, PDE4D, TSC22D3, IL1R2, KRT1, IL13, AVPR2, ANXA5, PAX2, STX1B, ADCYAP1, IL23A, TLR9, XCL1, PPARG, TRIB1, TRIB2, ZFPM1, HDAC4, ZBTB46, LEF1, PDGFB, NLRC5, DTX1, STC1, PLG, GATA2, PTGS2, THBS1, SLIT1, NLRP3, IL36RN, SLIT2, CGA, SLAMF1, S…	655	1017	16650	2.02459	1.15175e-05	6.39864e-07	5.93181e-07
GOTERM_BP_FAT	GO:0048534~hematopoietic or lymphoid organ development	67	8.49176	2.77598e-09	ITK, RARG, CSF2, KDM1A, GFI1, PLEK, RORC, NRARP, STON2, IKZF1, GLI3, SPN, RASSF2, CASP8, IL36B, MYB, DACT2, CCR7, JARID2, SOX4, RAG1, EOMES, MEF2C, ANXA1, AP3B1, GAB2, CBFA2T3, RUNX3, ETV6, MMP14, IL23A, HOXB3, PPARG, RAB7B, TRIB1, ZFPM1, HDAC4, ZBTB46, CEBPE, SATB1, EPAS1, LEF1, PDGFB, DTX1, GATA2, HDAC9, LY9, PURB, IL1RL2, BCL2L11, NLRP3, SLAMF1, TBX1, JUN, ANGPT1, PLCL2, LIF, IL31RA, INHBA, TM…	655	778	16650	2.18911	1.81492e-05	9.55228e-07	8.85536e-07
GOTERM_BP_FAT	GO:0045321~leukocyte activation	65	8.23828	3.3416e-09	PRR5, ITK, CSF2, PRF1, RORC, NRARP, IKZF1, GLI3, SPN, PPP3CA, CCND3, CASP8, IL36B, SIT1, MYB, MAP3K8, CCR7, SOX4, RAG1, EOMES, MEF2C, ANXA1, CD300A, IL13, AP3B1, GAB2, LAT2, FGR, MMP14, TMIGD2, ADORA2A, IL23A, XCL1, CD48, PRKCQ, ZFPM1, ZP4, HDAC4, SATB1, EBI3, LEF1, DTX1, CD1C, GATA2, HDAC9, THBS1, LY9, IL1RL2, SLAMF7, NLRP3, PAG1, SNCA, SLAMF1, JUN, HLA-DRB5, PLCL2, IL31RA, IGF2, INHBA, TSHR, BA…	655	747	16650	2.2119	2.18471e-05	1.09237e-06	1.01267e-06
GOTERM_BP_FAT	GO:0030097~hemopoiesis	64	8.11153	5.50526e-09	ITK, RARG, CSF2, KDM1A, GFI1, PLEK, RORC, NRARP, STON2, IKZF1, GLI3, SPN, RASSF2, CASP8, IL36B, MYB, DACT2, CCR7, SOX4, RAG1, EOMES, MEF2C, ANXA1, AP3B1, GAB2, CBFA2T3, RUNX3, ETV6, MMP14, IL23A, HOXB3, PPARG, RAB7B, TRIB1, ZFPM1, HDAC4, ZBTB46, CEBPE, SATB1, EPAS1, LEF1, PDGFB, DTX1, GATA2, HDAC9, LY9, PURB, IL1RL2, NLRP3, SLAMF1, JUN, ANGPT1, PLCL2, LIF, IL31RA, INHBA, TMEM64, TSHR, KLF2, BATF,…	655	739	16650	2.20145	3.59928e-05	1.71397e-06	1.58892e-06
GOTERM_BP_FAT	GO:0007399~nervous system development	138	17.4905	6.26764e-09	FOXA1, PRDM8, KDM1A, GFI1, SLC23A1, RAPH1, RORB, PREX2, CDH4, CDH2, DPF3, PLXNC1, CHAC1, SOX4, EOMES, HES6, MEF2C, UNC13A, ANK2, MYO7A, RUNX3, STX1B, ADCYAP1, COL4A1, BIN1, PARD3, ARMC4, NINJ1, HOXB3, PRKCQ, BRSK1, CHRNA3, SPTBN5, NEDD4L, DTX1, RASAL1, PCDH12, GATA2, PCDH18, CAMSAP2, BCL2L11, FLRT2, PDGFC, ST8SIA4, SLC38A3, PLXNA4, VASP, JUN, BCL11A, PTCH1, CRIM1, LIF, HMGA2, INHBA, L1CAM, GNG12,…	655	2170	16650	1.61656	4.0977e-05	1.78522e-06	1.65498e-06
GOTERM_BP_FAT	GO:0045595~regulation of cell differentiation	107	13.5615	6.74632e-09	FOXA1, CSF2, KDM1A, GFI1, PLEKHB1, RORC, RORB, NPPC, CDH4, RASSF2, IL36B, CDH2, MYB, PLXNC1, IL6R, RAG1, EOMES, MEF2C, UNC13A, RUNX3, STX1B, ADCYAP1, OLFM2, BIN1, IL23A, HOXB3, TRIB1, TRIB2, ZFPM1, PHLDB2, CHRNA3, PDGFB, NEDD4L, DTX1, RASAL1, GATA2, FOXO1, FLRT2, NLRP3, ZNF268, PLXNA4, JUN, BCL11A, PTCH1, LIF, HMGA2, INHBA, L1CAM, SSH3, NFATC4, CXCL10, SDK1, DAB2, BAMBI, ID1, UST, ID3, PLXNB2, CD…	655	1544	16650	1.76161	4.41064e-05	1.78522e-06	1.65498e-06
GOTERM_BP_FAT	GO:1901700~response to oxygen-containing compound	103	13.0545	6.9172e-09	FOXA1, CSF2, KDM1A, GFI1, RORC, RORB, EPS8, NPPC, TNFSF10, GRB10, PIM1, PDE8A, SOX4, MEF2C, ADCYAP1, COL4A1, MAPKAPK2, TXNIP, PRKCQ, TRIB1, PDGFB, STC1, FOXO1, SOCS1, IRAK2, PDGFC, NLRP3, UGT3A2, ATP6V0A4, PLK3, HLA-DRB5, JUN, SLC14A2, JUP, TNFRSF9, PTCH1, IGF2, TNFRSF10A, INHBA, MAFA, GNG12, TNFRSF10D, SELP, CXCL10, SDK1, GJB2, ID1, ID3, CPEB2, RYR2, RARG, CXCL9, CDKN1B, FASLG, ADM, DBH, SLC2A4,…	655	1466	16650	1.78598	4.52236e-05	1.78522e-06	1.65498e-06
GOTERM_BP_FAT	GO:0045937~positive regulation of phosphate metabolic process	81	10.2662	7.09939e-09	PRR5, BMP10, CXCL9, CDKN1B, CSF2, IL26, CCL4L2, PLEK, HTR2B, ADM, SPN, NPPC, CCND3, RASSF2, CCND2, CDH2, PIM1, GRB10, MAP3K8, CCR7, PDE8A, IL6R, MAP3K4, PTGIR, MEF2C, CD300A, IL13, AVPR2, ADRA2B, MID1, DUSP9, TNFRSF1A, FGR, ADCYAP1, PSRC1, ADORA2A, IL23A, MAPKAPK2, XCL2, TLR9, XCL1, ITGA6, ZP4, SHC2, CHRNA3, CCL3L1, FAM129A, PDGFB, CXCR4, ADCY1, THBS1, SOCS1, IRAK2, PDGFC, S1PR2, ZNF268, NTSR1, S…	655	1049	16650	1.96283	4.64147e-05	1.78522e-06	1.65498e-06
GOTERM_BP_FAT	GO:0010562~positive regulation of phosphorus metabolic process	81	10.2662	7.09939e-09	PRR5, BMP10, CXCL9, CDKN1B, CSF2, IL26, CCL4L2, PLEK, HTR2B, ADM, SPN, NPPC, CCND3, RASSF2, CCND2, CDH2, PIM1, GRB10, MAP3K8, CCR7, PDE8A, IL6R, MAP3K4, PTGIR, MEF2C, CD300A, IL13, AVPR2, ADRA2B, MID1, DUSP9, TNFRSF1A, FGR, ADCYAP1, PSRC1, ADORA2A, IL23A, MAPKAPK2, XCL2, TLR9, XCL1, ITGA6, ZP4, SHC2, CHRNA3, CCL3L1, FAM129A, PDGFB, CXCR4, ADCY1, THBS1, SOCS1, IRAK2, PDGFC, S1PR2, ZNF268, NTSR1, S…	655	1049	16650	1.96283	4.64147e-05	1.78522e-06	1.65498e-06
GOTERM_BP_FAT	GO:0001816~cytokine production	57	7.22433	9.84994e-09	ITK, CSF2, MAST4, IL26, HTR2B, DBH, SPN, IL36B, CASP1, C3AR1, CCR7, IL6R, EOMES, SRGN, CCBE1, ANXA1, PDE4D, IL1R2, IL13, AVPR2, FGR, ADCYAP1, TMIGD2, AIM2, IL23A, MAPKAPK2, TLR9, XCL1, PRKCQ, RAB7B, TRIB2, ZFPM1, CEBPE, EBI3, LEF1, NLRC5, PTGS2, THBS1, LY9, UBE2J1, IL1RL2, SOCS1, NLRP4, NLRP3, IL36RN, SLAMF1, HLA-DRB5, ANGPT1, CCL20, TNFRSF9, IL31RA, INHBA, KLF2, NFATC4, BATF, F2RL1, CD24	655	631	16650	2.29625	6.43969e-05	2.38515e-06	2.21113e-06
GOTERM_BP_FAT	GO:0007267~cell-cell signaling	105	13.308	1.0287e-08	FOXA1, RAB3B, SLC8A2, CDH2, TNFSF10, GRB10, SLC12A7, SOX4, MEF2C, TLE1, UNC13A, ANK2, SHISA7, SYTL3, STX1B, ADCYAP1, KCNQ3, GRIA2, BRSK1, CHRNA3, CHRNA6, PDGFB, ITPR1, SLC1A4, C2CD4C, FOXO1, OTOF, KCNMB4, CGA, NTSR1, HLA-DRB5, JUP, LIF, HMGA2, IL36G, INHBA, MAFA, ESR2, NFATC4, VANGL1, CXCL10, DAB2, GJB2, EFNA3, EFNA2, PCDHB2, BAMBI, AMOTL2, AMOTL1, CD24, FGF13, CDK14, FERMT2, GABRB3, GABRB2, RYR2…	655	1517	16650	1.75945	6.72545e-05	2.40203e-06	2.22678e-06
GOTERM_BP_FAT	GO:0006954~inflammatory response	57	7.22433	1.37229e-08	IL22, CXCL9, IL26, CCL4L2, CXCL3, SPN, IL36B, STAB1, C3AR1, CCR7, IL6R, PTGIR, ANXA1, IL1R2, KRT1, IL13, TNFRSF1A, ADCYAP1, AIM2, ADORA2A, IL23A, MAPKAPK2, XCL2, TLR9, XCL1, PRKCQ, PPARG, MGLL, CHST2, HDAC4, CCL3L1, CXCR4, PTGS2, HDAC9, THBS1, PTGS1, IL1RL2, IRAK2, NLRP4, SUSD4, NLRP3, HLA-DRB5, CCL22, CCL20, EPHX2, TNFRSF9, DAB2IP, IL31RA, IL36G, TNFRSF10A, CYP4F11, NFATC4, TNFRSF10D, SELP, CXCL…	655	637	16650	2.27462	8.97166e-05	3.09381e-06	2.8681e-06
GOTERM_BP_FAT	GO:0010033~response to organic substance	167	21.166	1.65991e-08	FOXA1, CSF2, KDM1A, CCL4L2, GFI1, RORC, RORB, FGFRL1, EPS8, NPPC, IL36B, CREB3L1, TNFSF10, GRB10, PIM1, CHAC1, PDE8A, IL6R, SOX4, CCBE1, MEF2C, IL1R1, IL1R2, ANK2, RUNX3, MID1, ADCYAP1, COL4A1, PARD3, MAPKAPK2, TXNIP, PRKCQ, TRIB1, ATF3, CHRNA3, CCL3L1, CHRNA6, EBI3, PDGFB, STC1, GATA2, FOXO1, UBE2J1, BCL2L11, SOCS1, FLRT2, IRAK2, PDGFC, NLRP3, UGT3A2, IL36RN, ATP6V0A4, CGA, ZNF268, NTSR1, HLA-DR…	655	2822	16650	1.50429	0.000108519	3.61749e-06	3.35357e-06
GOTERM_BP_FAT	GO:0002520~immune system development	67	8.49176	2.2976e-08	ITK, RARG, CSF2, KDM1A, GFI1, PLEK, RORC, NRARP, STON2, IKZF1, GLI3, SPN, RASSF2, CASP8, IL36B, MYB, DACT2, CCR7, JARID2, SOX4, RAG1, EOMES, MEF2C, ANXA1, AP3B1, GAB2, CBFA2T3, RUNX3, ETV6, MMP14, IL23A, HOXB3, PPARG, RAB7B, TRIB1, ZFPM1, HDAC4, ZBTB46, CEBPE, SATB1, EPAS1, LEF1, PDGFB, DTX1, GATA2, HDAC9, LY9, PURB, IL1RL2, BCL2L11, NLRP3, SLAMF1, TBX1, JUN, ANGPT1, PLCL2, LIF, IL31RA, INHBA, TM…	655	821	16650	2.07446	0.000150206	4.84571e-06	4.49218e-06
GOTERM_BP_FAT	GO:0046649~lymphocyte activation	56	7.09759	4.73733e-08	PRR5, ITK, PRF1, RORC, NRARP, IKZF1, GLI3, SPN, PPP3CA, CCND3, CASP8, IL36B, SIT1, MYB, MAP3K8, CCR7, SOX4, RAG1, EOMES, MEF2C, ANXA1, CD300A, IL13, AP3B1, LAT2, MMP14, TMIGD2, ADORA2A, IL23A, XCL1, CD48, PRKCQ, ZFPM1, ZP4, HDAC4, SATB1, EBI3, LEF1, DTX1, CD1C, HDAC9, LY9, IL1RL2, SLAMF7, NLRP3, PAG1, SLAMF1, HLA-DRB5, PLCL2, IGF2, INHBA, TSHR, BATF, CLCF1, F2RL1, CD24	655	643	16650	2.21386	0.000309679	9.67896e-06	8.9728e-06
GOTERM_BP_FAT	GO:1902531~regulation of intracellular signal transduction	112	14.1952	6.64014e-08	CSF2, KDM1A, CCL4L2, WWC2, PREX2, RASSF2, RGS3, CDH2, CREB3L1, WWC3, TNFSF10, MAP3K8, PDE8A, IL6R, MAP3K4, MEF2C, TLE1, CD300A, MID1, ADCYAP1, IL23A, MAPKAPK2, TRIB1, TRIB2, ATF3, SHC2, CCL3L1, PDGFB, ITPR1, ARHGAP18, RASAL1, LPAR4, FOXO1, BCL2L11, SOCS1, FLRT2, IRAK2, CD19, PDGFC, NLRP3, ZNF268, SLAMF1, PLK3, STARD13, JUN, GADD45A, ARHGEF39, IL31RA, LIF, IGF2, HMGA2, ARHGAP29, TNFRSF10A, INHBA, …	655	1714	16650	1.66104	0.000434038	1.31555e-05	1.21957e-05
GOTERM_BP_FAT	GO:0008283~cell proliferation	119	15.0824	7.4701e-08	CSF2, KDM1A, FGFRL1, EPS8, NPPC, CCND3, CCND2, CDH2, FTH1, LIPG, PIM1, IL6R, SOX4, SPINK2, MEF2C, CD300A, RUNX3, ADCYAP1, BIN1, IL23A, FSCN1, PRKCQ, TRIB1, ATF3, CCL3L1, EBI3, PDGFB, STC1, GATA2, FOXO1, PDGFC, CGA, ZNF268, EVI5, SLAMF1, HLA-DRB5, JUN, TNFRSF9, PTCH1, IL31RA, LIF, IGF2, HMGA2, INHBA, FOSL2, CXCL10, DAB2, BAMBI, ID1, PLXNB2, CD24, FGF13, RARG, BMP10, CDKN1B, TENM4, IL26, HTR2B, FAS…	655	1861	16650	1.62545	0.000488276	1.43646e-05	1.33166e-05
GOTERM_BP_FAT	GO:2000026~regulation of multicellular organismal development	112	14.1952	8.23833e-08	FOXA1, KDM1A, GFI1, CDH4, RASSF2, IL36B, CDH2, MYB, C3AR1, PLXNC1, RAG1, EOMES, CCBE1, MEF2C, UNC13A, KRT1, STX1B, ADCYAP1, BIN1, IL23A, PARD3, HOXB3, TRIB1, ZFPM1, PHLDB2, CHRNA3, PDGFB, NEDD4L, DTX1, RASAL1, GATA2, FLRT2, NLRP3, PLXNA4, STARD13, JUN, BCL11A, PTCH1, LIF, HMGA2, INHBA, L1CAM, SSH3, NFATC4, VANGL1, CXCL10, SDK1, DAB2, BAMBI, ID1, UST, PLXNB2, CD24, FGF13, RARG, BMP10, CDKN1B, TENM…	655	1721	16650	1.65428	0.000538477	1.51422e-05	1.40374e-05
GOTERM_BP_FAT	GO:0009605~response to external stimulus	129	16.3498	8.3377e-08	CSF2, DENND5B, CCL4L2, GFI1, PLEKHB1, PRF1, CDH4, PLAU, LIPG, PIM1, C3AR1, PLXNC1, IL6R, SLC6A19, MEF2C, IL1R1, IL1R2, KRT1, ADCYAP1, SLFN11, IL23A, MAPKAPK2, TXNIP, PRKCQ, TRIB1, PHLDB2, ATF3, SPTBN5, CCL3L1, PDGFB, STC1, FOXO1, BCL2L11, FLRT2, IRAK2, NLRP3, IL36RN, SLC38A3, NTSR1, PLXNA4, VASP, HLA-DRB5, JUN, JUP, GADD45A, TNFRSF9, PTCH1, IL31RA, HMGA2, TNFRSF10A, L1CAM, GNG12, TNFRSF10D, SELP,…	655	2073	16650	1.58184	0.00054497	1.51422e-05	1.40374e-05
GOTERM_BP_FAT	GO:0051247~positive regulation of protein metabolic process	101	12.801	1.11431e-07	CSF2, KDM1A, CCL4L2, CCND3, RASSF2, CCND2, CDH2, MYB, TNFSF10, PIM1, MAP3K8, PDE8A, IL6R, SOX4, MAP3K4, CCBE1, MEF2C, CD300A, MID1, ADCYAP1, ASTL, IL23A, MAPKAPK2, PRKCQ, TRIB1, TRIB2, ZFPM1, CHRNA3, SHC2, CCL3L1, EBI3, PDGFB, NEDD4L, FOXO1, BCL2L11, SOCS1, IRAK2, PDGFC, NLRP3, ZNF268, SLAMF1, PLK3, JUN, GADD45A, IL31RA, LIF, IGF2, TNFRSF10A, INHBA, DAB2, EHD4, CD24, FGF13, PRR5, BMP10, CDKN1B, I…	655	1508	16650	1.70252	0.00072827	1.92321e-05	1.7829e-05
GOTERM_BP_FAT	GO:0051270~regulation of cellular component movement	64	8.11153	1.1178e-07	DOCK5, RYR2, BMP10, CXCL9, CDKN1B, PTPRJ, CXCL3, EPB41L4B, PLAU, C3AR1, CCR7, PLXNC1, IL6R, DSP, CCBE1, ANXA1, CD300A, IL1R1, PDE4D, ANK2, RHOB, FGR, MMP14, IL23A, GCSAML, ARMC4, XCL1, ITGA6, SGK1, TRIB1, PHLDB2, HDAC4, LAMA5, LEF1, PDGFB, CXCR4, ARHGAP18, STC1, RETN, PTGS2, HDAC9, THBS1, FLRT2, PDGFC, SLIT2, CGA, ZNF268, PLXNA4, STARD13, JUN, JUP, ANGPT1, CCL20, ARHGEF39, MCAM, DAB2IP, VEGFA, SE…	655	802	16650	2.02852	0.000730553	1.92321e-05	1.7829e-05
GOTERM_BP_FAT	GO:0006955~immune response	103	13.0545	1.18139e-07	CSF2, NCF2, CCL4L2, GFI1, PRF1, RORC, IL36B, SIT1, FTH1, MYB, TNFSF10, C3AR1, IL6R, RAG1, EOMES, MEF2C, CD300A, IL1R1, IL1R2, KRT1, MID1, CLEC4A, ADCYAP1, IL23A, MAPKAPK2, PRKCQ, ZFPM1, CCL3L1, EBI3, GATA2, CD1C, LY9, CD1A, SOCS1, IRAK2, CD19, NLRP3, SLAMF7, IL36RN, PAG1, SLAMF1, HLA-DRB5, JUN, TNFRSF9, IL31RA, LIF, IL36G, TNFRSF10A, TNFRSF10D, CXCL10, CD24, ITK, IL22, CXCL9, IL26, FASLG, ADM, PT…	655	1551	16650	1.6881	0.000772093	1.98049e-05	1.836e-05
GOTERM_BP_FAT	GO:0042327~positive regulation of phosphorylation	71	8.99873	1.2363e-07	PRR5, BMP10, CDKN1B, CSF2, IL26, CCL4L2, HTR2B, SPN, CCND3, RASSF2, CCND2, CDH2, PIM1, GRB10, MAP3K8, CCR7, PDE8A, IL6R, MAP3K4, MEF2C, CD300A, IL13, ADRA2B, MID1, DUSP9, TNFRSF1A, FGR, ADCYAP1, PSRC1, IL23A, MAPKAPK2, XCL2, TLR9, XCL1, ITGA6, ZP4, SHC2, CHRNA3, CCL3L1, FAM129A, PDGFB, CXCR4, ADCY1, THBS1, SOCS1, IRAK2, PDGFC, S1PR2, ZNF268, SNCA, SLAMF1, TBX1, JUN, CCL22, ANGPT1, CCL20, GADD45A,…	655	932	16650	1.93649	0.000807964	2.02073e-05	1.8733e-05
GOTERM_BP_FAT	GO:0033993~response to lipid	67	8.49176	1.33597e-07	FOXA1, IL22, RARG, CXCL9, CDKN1B, CSF2, GFI1, RORC, ADM, FASLG, RORB, CXCL3, CASP8, MDK, PIM1, CASP1, CA9, CCR7, PTGIR, MEF2C, ANXA1, PDE4D, IL13, SSTR3, PAX2, TNFRSF1A, ADCYAP1, ALDH1A2, MAPKAPK2, TXNIP, PPARG, AGXT, TRIB1, CEBPE, LEF1, STC1, ADCY1, GATA2, PTGS2, THBS1, FOXO1, IRAK2, NLRP3, SLIT2, NTSR1, SNCA, TBX1, ARNT2, MBD4, JUN, CCL20, TNFRSF9, PTCH1, DAB2IP, HMGA2, TNFRSF10A, INHBA, GNG12,…	655	860	16650	1.98038	0.000873077	2.10879e-05	1.95494e-05
GOTERM_BP_FAT	GO:0044093~positive regulation of molecular function	117	14.8289	1.35468e-07	FOXA1, CSF2, KDM1A, DENND5B, CCL4L2, PREX2, CCND3, RASSF2, RGS3, CCND2, TNFSF10, PIM1, MAP3K8, IL6R, MAP3K4, MEF2C, CD300A, ARID5B, ANK2, ATP1B1, MYL4, ADCYAP1, IL23A, MAPKAPK2, PRKCQ, CHRNA3, SPTBN5, SHC2, PARM1, CCL3L1, PDGFB, ARHGAP18, RASAL1, BCL2L11, SOCS1, IRAK2, PDGFC, NLRP3, ZNF268, EVI5, NTSR1, STARD13, JUN, JUP, GADD45A, ARHGEF39, IGF2, HMGA2, ARHGAP29, TNFRSF10A, ARHGAP25, ESR2, BAMBI,…	655	1840	16650	1.61637	0.000885299	2.10879e-05	1.95494e-05
GOTERM_BP_FAT	GO:0002682~regulation of immune system process	94	11.9138	1.46076e-07	PRR5, ITK, RARG, CXCL9, KDM1A, GFI1, NRARP, PTPRJ, CXCL3, GLI3, SPN, PPP3CA, RASSF2, CASP8, IL36B, SIT1, MYB, C3AR1, MAP3K8, CCR7, IL6R, RAG1, MEF2C, ANXA1, CD300A, IL1R1, PDE4D, TSC22D3, KRT1, IL13, AP3B1, GAB2, PARP9, LAT2, CLEC4A, FGR, ADCYAP1, MMP14, TMIGD2, AIM2, ADORA2A, IL23A, MAPKAPK2, GCSAML, TLR9, XCL1, CD48, PRKCQ, PPARG, RAB7B, TRIB1, ZFPM1, ZP4, COL17A1, ZBTB46, EBI3, LEF1, NLRC5, DT…	655	1378	16650	1.73401	0.00095459	2.22104e-05	2.05899e-05
GOTERM_BP_FAT	GO:0019220~regulation of phosphate metabolic process	105	13.308	2.10083e-07	CSF2, CCL4L2, NPPC, CCND3, RASSF2, RGS3, CCND2, CDH2, GRB10, PIM1, MAP3K8, PDE8A, IL6R, MAP3K4, MEF2C, CD300A, MID1, ADCYAP1, IL23A, PARD3, MAPKAPK2, TRIB1, TRIB2, ATF3, CHRNA3, SHC2, CCL3L1, GPR87, PDGFB, FOXO1, SOCS1, FLRT2, IRAK2, PDGFC, ZNF268, NTSR1, SLAMF1, TMEM132D, JUN, GADD45A, IL31RA, LIF, IGF2, TNFRSF10A, INHBA, CAMSAP3, CXCL10, DAB2, EHD4, ID1, PLXNB2, CD24, FGF13, PRR5, BMP10, CXCL9,…	655	1610	16650	1.65782	0.00137258	3.1148e-05	2.88755e-05
GOTERM_BP_FAT	GO:0051174~regulation of phosphorus metabolic process	105	13.308	2.17229e-07	CSF2, CCL4L2, NPPC, CCND3, RASSF2, RGS3, CCND2, CDH2, GRB10, PIM1, MAP3K8, PDE8A, IL6R, MAP3K4, MEF2C, CD300A, MID1, ADCYAP1, IL23A, PARD3, MAPKAPK2, TRIB1, TRIB2, ATF3, CHRNA3, SHC2, CCL3L1, GPR87, PDGFB, FOXO1, SOCS1, FLRT2, IRAK2, PDGFC, ZNF268, NTSR1, SLAMF1, TMEM132D, JUN, GADD45A, IL31RA, LIF, IGF2, TNFRSF10A, INHBA, CAMSAP3, CXCL10, DAB2, EHD4, ID1, PLXNB2, CD24, FGF13, PRR5, BMP10, CXCL9,…	655	1611	16650	1.65679	0.00141924	3.1148e-05	2.88755e-05
GOTERM_BP_FAT	GO:0001934~positive regulation of protein phosphorylation	68	8.6185	2.19151e-07	PRR5, BMP10, CDKN1B, CSF2, IL26, CCL4L2, HTR2B, SPN, CCND3, RASSF2, CCND2, CDH2, PIM1, MAP3K8, CCR7, PDE8A, IL6R, MAP3K4, MEF2C, CD300A, IL13, ADRA2B, MID1, DUSP9, TNFRSF1A, ADCYAP1, PSRC1, IL23A, MAPKAPK2, XCL2, TLR9, XCL1, ZP4, SHC2, CHRNA3, CCL3L1, FAM129A, PDGFB, CXCR4, ADCY1, THBS1, SOCS1, IRAK2, PDGFC, S1PR2, ZNF268, SNCA, SLAMF1, TBX1, JUN, CCL22, ANGPT1, CCL20, GADD45A, DAB2IP, LIF, IL31R…	655	890	16650	1.94219	0.00143178	3.1148e-05	2.88755e-05
GOTERM_BP_FAT	GO:0042325~regulation of phosphorylation	94	11.9138	2.42147e-07	PRR5, BMP10, CDKN1B, CSF2, IL26, CCL4L2, HTR2B, PTPRJ, SPN, CCND3, RASSF2, RGS3, CCND2, CDH2, PIM1, GRB10, MAP3K8, CCR7, PDE8A, IL6R, MAP3K4, DUSP4, MEF2C, CD300A, PDE4D, IL13, ADRA2B, MID1, DUSP9, CBFA2T3, TNFRSF1A, FGR, ADCYAP1, PSRC1, ADORA2A, CCKBR, IL23A, PARD3, MAPKAPK2, XCL2, TLR9, XCL1, ITGA6, TRIB1, TRIB2, ATF3, ZP4, HDAC4, SHC2, CHRNA3, CCL3L1, FAM129A, PDGFB, NLRC5, CXCR4, ADCY1, THBS1…	655	1393	16650	1.71534	0.00158191	3.36842e-05	3.12267e-05
GOTERM_BP_FAT	GO:0045597~positive regulation of cell differentiation	65	8.23828	2.84201e-07	FOXA1, DOCK5, BMP10, CXCL9, CSF2, TENM4, KDM1A, ADM, GLI3, NPPC, CDH4, CASP8, IL36B, CDH2, MYB, RAC3, IL6R, RAG1, EOMES, MEF2C, ANXA1, UNC13A, IL13, AP3B1, ADRA2B, ETV5, PAX2, ADCYAP1, OLFM2, MMP14, ZEB2, BIN1, IL23A, PPARG, RAB7B, TRIB1, ZBTB46, LEF1, NEDD4L, CXCR4, RASAL1, GATA2, PTGS2, IL1RL2, GPC1, NLRP3, SLIT2, S1PR2, ZNF268, CTHRC1, TBX1, JUN, BCL11A, PTCH1, DAB2IP, LIF, INHBA, TMEM64, L1CA…	655	841	16650	1.96467	0.00185638	3.87106e-05	3.58863e-05
GOTERM_BP_FAT	GO:0098609~cell-cell adhesion	82	10.3929	3.03805e-07	PRR5, FOXA1, ITK, TENM4, DOCK9, PLEK, RORC, NRARP, CLDN1, GLI3, FGFRL1, RPL6, SPN, PPP3CA, CCND3, LASP1, CDH4, CASP8, IL36B, CDH2, SIT1, MYB, TNKS1BP1, MAP3K8, CCR7, SOX4, RAG1, EOMES, DSP, ANXA1, CD300A, AP3B1, TMIGD2, ADORA2A, IL23A, FSCN1, XCL1, CD48, ITGA6, PRKCQ, ZFPM1, PHLDB2, ZP4, CSTA, AHNAK, SATB1, EBI3, LEF1, AMIGO2, DTX1, ARHGAP18, PLG, PCDH12, CD1C, LY9, PCDH18, IL1RL2, PERP, PAK6, NL…	655	1164	16650	1.79075	0.0019843	4.01167e-05	3.71898e-05
GOTERM_BP_FAT	GO:0032270~positive regulation of cellular protein metabolic process	95	12.0406	3.06796e-07	PRR5, BMP10, CDKN1B, CSF2, KDM1A, IL26, CCL4L2, HTR2B, FASLG, SPN, PPP3CA, CCND3, RASSF2, CASP8, CCND2, CDH2, MYB, TNFSF10, PIM1, CASP1, MAP3K8, CCR7, JARID2, PDE8A, IL6R, SOX4, MAP3K4, CCBE1, MEF2C, CD300A, IL13, AVPR2, ADRA2B, MID1, DUSP9, CBFA2T3, TNFRSF1A, ADCYAP1, MMP14, AIM2, PSRC1, ASTL, IL23A, MAPKAPK2, XCL2, TLR9, XCL1, PPARG, TRIB1, TRIB2, ZP4, HDAC4, SHC2, CHRNA3, CCL3L1, PCOLCE2, FAM1…	655	1420	16650	1.70062	0.00200382	4.01167e-05	3.71898e-05
GOTERM_BP_FAT	GO:0050790~regulation of catalytic activity	140	17.744	3.16781e-07	CSF2, DENND5B, CCL4L2, GFI1, PREX2, CCND3, RASSF2, RGS3, CCND2, TNFSF10, PIM1, MAP3K8, IL6R, MAP3K4, RAG1, SPINK2, MEF2C, CD300A, ATP1B1, MYL4, ADCYAP1, PPP1R3F, IL23A, MAPKAPK2, TXNIP, PRKCQ, TRIB1, TRIB2, PIF1, CHRNA3, SPTBN5, SHC2, PARM1, CCL3L1, GPR87, PDGFB, ARHGAP18, RASAL1, FBXO43, BCL2L11, SOCS1, FLRT2, IRAK2, PDGFC, NLRP3, EVI5, SLAMF1, TMEM132D, STARD13, JUN, GADD45A, ARHGEF39, CRIM1, I…	655	2357	16650	1.50988	0.00206897	4.06101e-05	3.76472e-05
GOTERM_BP_FAT	GO:0001817~regulation of cytokine production	50	6.33714	3.26996e-07	CSF2, MAST4, IL26, HTR2B, SPN, IL36B, CASP1, C3AR1, CCR7, IL6R, SRGN, CCBE1, ANXA1, PDE4D, IL1R2, IL13, FGR, ADCYAP1, TMIGD2, AIM2, IL23A, MAPKAPK2, TLR9, XCL1, PRKCQ, RAB7B, TRIB2, ZFPM1, EBI3, LEF1, NLRC5, PTGS2, THBS1, LY9, UBE2J1, IL1RL2, SOCS1, NLRP4, NLRP3, IL36RN, SLAMF1, HLA-DRB5, ANGPT1, CCL20, TNFRSF9, INHBA, KLF2, NFATC4, F2RL1, CD24	655	577	16650	2.20276	0.00213561	4.11134e-05	3.81139e-05
GOTERM_BP_FAT	GO:0031325~positive regulation of cellular metabolic process	162	20.5323	3.5247e-07	FOXA1, CSF2, KDM1A, CCL4L2, RORC, IKZF1, RORB, IKZF4, NPPC, CCND3, RASSF2, CCND2, CDH2, CREB3L1, MYB, TNFSF10, GRB10, PIM1, MAP3K8, PDE8A, IL6R, SOX4, MAP3K4, EOMES, CCBE1, MEF2C, CD300A, ATP1B4, RUNX3, MID1, ADCYAP1, ASTL, IL23A, MAPKAPK2, PRKCQ, TRIB1, TRIB2, ZFPM1, ATF3, CHRNA3, SHC2, PARM1, CCL3L1, EPAS1, EBI3, PDGFB, GATA2, FOXO1, BCL2L11, SOCS1, IRAK2, PDGFC, NLRP3, CGA, SLC38A3, ZNF268, NT…	655	2839	16650	1.45052	0.0023018	4.34802e-05	4.03079e-05
GOTERM_BP_FAT	GO:0042110~T cell activation	42	5.32319	3.97817e-07	PRR5, ITK, SATB1, EBI3, LEF1, RORC, DTX1, NRARP, CD1C, LY9, GLI3, SPN, PPP3CA, CCND3, IL1RL2, CASP8, IL36B, MYB, NLRP3, CCR7, MAP3K8, SOX4, PAG1, RAG1, SLAMF1, EOMES, HLA-DRB5, ANXA1, CD300A, IGF2, AP3B1, BATF, TMIGD2, ADORA2A, IL23A, F2RL1, XCL1, CD48, PRKCQ, CD24, ZFPM1, ZP4	655	446	16650	2.3938	0.00259755	4.72896e-05	4.38394e-05
GOTERM_BP_FAT	GO:0070489~T cell aggregation	42	5.32319	3.97817e-07	PRR5, ITK, SATB1, EBI3, LEF1, RORC, DTX1, NRARP, CD1C, LY9, GLI3, SPN, PPP3CA, CCND3, IL1RL2, CASP8, IL36B, MYB, NLRP3, CCR7, MAP3K8, SOX4, PAG1, RAG1, SLAMF1, EOMES, HLA-DRB5, ANXA1, CD300A, IGF2, AP3B1, BATF, TMIGD2, ADORA2A, IL23A, F2RL1, XCL1, CD48, PRKCQ, CD24, ZFPM1, ZP4	655	446	16650	2.3938	0.00259755	4.72896e-05	4.38394e-05
GOTERM_BP_FAT	GO:0071593~lymphocyte aggregation	42	5.32319	4.22996e-07	PRR5, ITK, SATB1, EBI3, LEF1, RORC, DTX1, NRARP, CD1C, LY9, GLI3, SPN, PPP3CA, CCND3, IL1RL2, CASP8, IL36B, MYB, NLRP3, CCR7, MAP3K8, SOX4, PAG1, RAG1, SLAMF1, EOMES, HLA-DRB5, ANXA1, CD300A, IGF2, AP3B1, BATF, TMIGD2, ADORA2A, IL23A, F2RL1, XCL1, CD48, PRKCQ, CD24, ZFPM1, ZP4	655	447	16650	2.38844	0.00276172	4.93847e-05	4.57817e-05
GOTERM_BP_FAT	GO:0046631~alpha-beta T cell activation	19	2.40811	4.62649e-07	EOMES, ITK, ANXA1, SATB1, CD300A, EBI3, LEF1, RORC, AP3B1, LY9, GLI3, BATF, ADORA2A, IL23A, MYB, XCL1, NLRP3, PRKCQ, ZFPM1	655	114	16650	4.23664	0.00302023	5.30667e-05	4.9195e-05
GOTERM_BP_FAT	GO:0009893~positive regulation of metabolic process	171	21.673	4.70805e-07	FOXA1, CSF2, KDM1A, CCL4L2, RORC, IKZF1, RORB, IKZF4, NPPC, CCND3, RASSF2, CCND2, CDH2, CREB3L1, MYB, TNFSF10, GRB10, PIM1, MAP3K8, PDE8A, IL6R, SOX4, MAP3K4, EOMES, CCBE1, MEF2C, TLE1, CD300A, ATP1B4, ANK2, RUNX3, MID1, ADCYAP1, ASTL, IL23A, MAPKAPK2, PRKCQ, TRIB1, TRIB2, ZFPM1, ATF3, CHRNA3, SHC2, PARM1, CCL3L1, EPAS1, EBI3, PDGFB, NEDD4L, GATA2, FOXO1, BCL2L11, SOCS1, IRAK2, PDGFC, NLRP3, CGA,…	655	3052	16650	1.42424	0.00307339	5.30711e-05	4.91991e-05
GOTERM_BP_FAT	GO:0001932~regulation of protein phosphorylation	88	11.1534	5.58834e-07	PRR5, BMP10, CDKN1B, CSF2, IL26, CCL4L2, HTR2B, PTPRJ, SPN, CCND3, RASSF2, RGS3, CCND2, CDH2, PIM1, MAP3K8, CCR7, PDE8A, IL6R, MAP3K4, DUSP4, MEF2C, CD300A, PDE4D, IL13, ADRA2B, MID1, DUSP9, TNFRSF1A, FGR, ADCYAP1, PSRC1, ADORA2A, IL23A, PARD3, MAPKAPK2, XCL2, TLR9, XCL1, TRIB1, TRIB2, ATF3, ZP4, SHC2, CHRNA3, CCL3L1, FAM129A, PDGFB, CXCR4, ADCY1, THBS1, PPM1E, FOXO1, SOCS1, FLRT2, IRAK2, PDGFC, …	655	1300	16650	1.72073	0.00364699	6.19264e-05	5.74084e-05
GOTERM_BP_FAT	GO:1902533~positive regulation of intracellular signal transduction	68	8.6185	5.88187e-07	PRR5, IL22, CXCL9, CSF2, IL26, CCL4L2, HTR2B, PTPRJ, FASLG, PRL, RASSF2, CASP8, CDH2, TNFSF10, CASP1, MAP3K8, CCR7, PDE8A, IL6R, MAP3K4, PTGIR, MEF2C, CD300A, IL13, ADRA2B, MID1, DUSP9, TNFRSF1A, FGR, ADCYAP1, IL23A, MAPKAPK2, XCL2, TLR9, XCL1, SHC2, CCL3L1, PDGFB, CXCR4, LPAR4, PTGS2, THBS1, BCL2L11, SOCS1, IRAK2, PDGFC, S1PR2, ZNF268, SLAMF1, TBX1, JUN, CCL22, ANGPT1, CCL20, GADD45A, DAB2IP, LI…	655	915	16650	1.88913	0.00383818	6.40928e-05	5.94167e-05
GOTERM_BP_FAT	GO:0070486~leukocyte aggregation	42	5.32319	6.34922e-07	PRR5, ITK, SATB1, EBI3, LEF1, RORC, DTX1, NRARP, CD1C, LY9, GLI3, SPN, PPP3CA, CCND3, IL1RL2, CASP8, IL36B, MYB, NLRP3, CCR7, MAP3K8, SOX4, PAG1, RAG1, SLAMF1, EOMES, HLA-DRB5, ANXA1, CD300A, IGF2, AP3B1, BATF, TMIGD2, ADORA2A, IL23A, F2RL1, XCL1, CD48, PRKCQ, CD24, ZFPM1, ZP4	655	454	16650	2.35162	0.00414252	6.80512e-05	6.30863e-05
GOTERM_BP_FAT	GO:0008015~blood circulation	45	5.70342	6.8198e-07	HDAC4, DOCK5, RYR2, BMP10, EPAS1, HTR2B, PDGFB, ITPR1, NEDD4L, STC1, ADM, PTPRJ, ATP2A1, DBH, PTGS2, SLC8A2, PTGS1, NPPC, C3AR1, KCNMB4, SLIT2, NTSR1, DSP, JUP, ANGPT1, EPHX2, CYP4F2, PDE4D, AVPR2, ANK2, ATP2B2, ATP1B1, CYP4F12, ADRA2B, F5, VEGFA, MYL4, CXCL10, ADCYAP1, ADORA2A, XCL2, F2RL1, PPARG, FGF13, SGK1	655	506	16650	2.26066	0.00444886	7.19158e-05	6.6669e-05
GOTERM_BP_FAT	GO:0022008~neurogenesis	95	12.0406	6.98302e-07	GABRB3, PRDM8, FOXA1, GABRB2, TENM4, KDM1A, GFI1, RAPH1, ADM, RORB, PTPRF, GLI3, PREX2, PPP3CA, CDH4, CDH2, SIX3, NCS1, RAC3, PLXNC1, CHAC1, ZNF521, SOX4, EOMES, MEF2C, ANXA1, UNC13A, NAV1, MYO7A, ADRA2B, RUNX3, ETV5, PAX2, ETV6, STX1B, ADCYAP1, MMP14, ADORA2A, BIN1, ALDH1A2, PARD3, TLR9, HOXB3, PRKCQ, PPARG, SGK1, BRSK1, SPTBN5, CHRNA3, LEF1, NEDD4L, CXCR4, DTX1, RASAL1, PCDH12, ADCY1, GATA2, HD…	655	1447	16650	1.66889	0.00455509	7.24682e-05	6.7181e-05
GOTERM_BP_FAT	GO:0002573~myeloid leukocyte differentiation	25	3.16857	7.25065e-07	CSF2, KDM1A, ZBTB46, CEBPE, LEF1, GATA2, CASP8, RASSF2, CCR7, JUN, MEF2C, LIF, IL31RA, INHBA, TMEM64, GAB2, CBFA2T3, BATF, VEGFA, EFNA2, IL23A, F2RL1, PPARG, TRIB1, ZFPM1	655	195	16650	3.25895	0.00472926	7.40699e-05	6.86659e-05
GOTERM_BP_FAT	GO:0048584~positive regulation of response to stimulus	123	15.5894	7.69711e-07	FOXA1, CSF2, CCL4L2, GFI1, SLA, EPS8, RASSF2, CDH2, RUSC1, MYB, TNFSF10, GRB10, C3AR1, MAP3K8, PDE8A, IL6R, SOX4, MAP3K4, CCBE1, MEF2C, CD300A, IL1R1, KRT1, MID1, CLEC4A, STX1B, ADCYAP1, IL23A, MAPKAPK2, PRKCQ, ATF3, SHC2, CCL3L1, PDGFB, LPAR4, GATA2, BCL2L11, SOCS1, IRAK2, CD19, PDGFC, NLRP3, ZNF268, PAG1, NTSR1, SLAMF1, HLA-DRB5, JUN, JUP, GADD45A, IL31RA, LIF, IGF2, HMGA2, TNFRSF10A, INHBA, NF…	655	2030	16650	1.54022	0.00501973	7.65524e-05	7.09673e-05
GOTERM_BP_FAT	GO:0007159~leukocyte cell-cell adhesion	44	5.57668	7.72783e-07	PRR5, ITK, SATB1, EBI3, LEF1, RORC, DTX1, NRARP, CD1C, LY9, GLI3, SPN, PPP3CA, CCND3, IL1RL2, CASP8, IL36B, SIT1, MYB, NLRP3, CCR7, MAP3K8, SOX4, PAG1, RAG1, SLAMF1, EOMES, HLA-DRB5, ANXA1, CD300A, IGF2, AP3B1, BATF, SELP, TMIGD2, ADORA2A, IL23A, F2RL1, XCL1, CD48, PRKCQ, CD24, ZFPM1, ZP4	655	491	16650	2.27795	0.00503972	7.65524e-05	7.09673e-05
GOTERM_BP_FAT	GO:0048468~cell development	120	15.2091	8.09617e-07	FOXA1, PRDM8, KDM1A, GFI1, RAPH1, RORB, FGFRL1, PREX2, NPPC, CDH4, CDH2, PLXNC1, SOX4, EOMES, SPINK2, MEF2C, UNC13A, ARID5B, ANK2, MYO7A, RUNX3, STX1B, ADCYAP1, BIN1, PARD3, HOXB3, PRKCQ, TRIB1, ZFPM1, PHLDB2, BRSK1, CHRNA3, SPTBN5, EPAS1, PDGFB, NEDD4L, DTX1, STC1, RASAL1, PCDH12, GATA2, UBE2J1, CAMSAP2, FLRT2, RDH10, PLXNA4, VASP, JUN, BCL11A, LIF, HMGA2, INHBA, L1CAM, SSH3, FOSL2, NFATC4, CAMS…	655	1968	16650	1.54999	0.00527929	7.90041e-05	7.32401e-05
GOTERM_BP_FAT	GO:0030334~regulation of cell migration	55	6.97085	8.56008e-07	DOCK5, BMP10, CXCL9, PTPRJ, CXCL3, EPB41L4B, PLAU, C3AR1, CCR7, PLXNC1, IL6R, CCBE1, ANXA1, CD300A, IL1R1, RHOB, FGR, MMP14, IL23A, GCSAML, XCL1, ITGA6, SGK1, TRIB1, PHLDB2, HDAC4, LAMA5, LEF1, PDGFB, CXCR4, STC1, RETN, PTGS2, HDAC9, THBS1, FLRT2, PDGFC, SLIT2, CGA, ZNF268, PLXNA4, STARD13, JUN, ANGPT1, CCL20, ARHGEF39, MCAM, DAB2IP, VEGFA, SELP, CXCL10, DAB2, F2RL1, PLXNB2, AMOTL1	655	685	16650	2.04101	0.00558095	8.17318e-05	7.57688e-05
GOTERM_BP_FAT	GO:0003013~circulatory system process	45	5.70342	8.62572e-07	HDAC4, DOCK5, RYR2, BMP10, EPAS1, HTR2B, PDGFB, ITPR1, NEDD4L, STC1, ADM, PTPRJ, ATP2A1, DBH, PTGS2, SLC8A2, PTGS1, NPPC, C3AR1, KCNMB4, SLIT2, NTSR1, DSP, JUP, ANGPT1, EPHX2, CYP4F2, PDE4D, AVPR2, ANK2, ATP2B2, ATP1B1, CYP4F12, ADRA2B, F5, VEGFA, MYL4, CXCL10, ADCYAP1, ADORA2A, XCL2, F2RL1, PPARG, FGF13, SGK1	655	510	16650	2.24293	0.00562362	8.17318e-05	7.57688e-05
GOTERM_BP_FAT	GO:0046903~secretion	77	9.75919	9.00375e-07	RAB3B, CSF2, IL26, PLEK, HTR2B, ADM, PRL, HK2, PPP3CA, CREB3L1, NCS1, CASP1, CA9, CCR7, SOX4, SRGN, MEF2C, ANXA1, UNC13A, SLC32A1, CD300A, IL1R2, IL13, AVPR2, GAB2, ADRA2B, SYN2, SYTL3, F5, LAT2, FGR, STX1B, ADCYAP1, OLFM2, AIM2, ADORA2A, CCKBR, TLR9, SGK1, AGXT, ZP4, BRSK1, CHRNA3, CHRNA6, PDGFB, ITPR1, STC1, PLG, RETN, C2CD4C, GATA2, THBS1, CACNA1I, SOCS1, OTOF, KCNMB4, NLRP3, IL36RN, CGA, NTSR…	655	1098	16650	1.78263	0.00586936	8.4095e-05	7.79596e-05
GOTERM_BP_FAT	GO:0030335~positive regulation of cell migration	38	4.81622	9.40864e-07	HDAC4, DOCK5, CXCL9, LEF1, PDGFB, RETN, CXCL3, PTGS2, HDAC9, THBS1, EPB41L4B, PLAU, PDGFC, C3AR1, CCR7, CGA, ZNF268, IL6R, CCBE1, JUN, ANGPT1, CCL20, IL1R1, MCAM, ARHGEF39, DAB2IP, RHOB, VEGFA, SELP, FGR, CXCL10, DAB2, MMP14, IL23A, F2RL1, XCL1, ITGA6, AMOTL1	655	395	16650	2.44545	0.00613249	8.6639e-05	8.0318e-05
GOTERM_BP_FAT	GO:0034097~response to cytokine	61	7.73131	1.16535e-06	CXCL9, CCL4L2, GFI1, FASLG, SLC2A4, AFF3, CXCL3, CASP8, IL36B, KYNU, CCR7, IL6R, ANXA1, IL1R1, IL1R2, IL13, AVPR2, PARP9, MID1, TNFRSF1A, AIM2, ALDH1A2, MAPKAPK2, XCL2, XCL1, PPARG, HDAC4, RNASEL, CCL3L1, EBI3, LEF1, PDGFB, NLRC5, CXCR4, PTGS2, THBS1, IL1RL2, SOCS1, FLRT2, IRAK2, IL36RN, SLIT2, ZNF268, SNCA, JUN, HLA-DRB5, CCL22, ANGPT1, CCL20, TNFRSF9, GSS, DAB2IP, IL31RA, IL36G, TNFRSF10A, KLF2…	655	802	16650	1.93343	0.00759009	0.00010582	9.80996e-05
GOTERM_BP_FAT	GO:0050867~positive regulation of cell activation	33	4.18251	1.2638e-06	PRR5, PLEK, EBI3, GATA2, THBS1, GLI3, SPN, IL1RL2, IL36B, MYB, NLRP3, CCR7, MAP3K8, RAG1, SLAMF1, MEF2C, HLA-DRB5, ANXA1, IL13, IGF2, AP3B1, GAB2, SELP, FGR, MMP14, TMIGD2, IL23A, CLCF1, F2RL1, XCL1, PRKCQ, CD24, ZP4	655	320	16650	2.62142	0.00822866	0.000112272	0.000104081
GOTERM_BP_FAT	GO:0051094~positive regulation of developmental process	76	9.63245	1.27075e-06	FOXA1, DOCK5, BMP10, CXCL9, TENM4, KDM1A, ADM, GLI3, CDH4, CASP8, IL36B, CDH2, MYB, C3AR1, RAC3, RAG1, CCBE1, MEF2C, ANXA1, UNC13A, IL13, AP3B1, ADRA2B, ETV5, PAX2, RHOB, ADCYAP1, OLFM2, MMP14, TMIGD2, BIN1, IL23A, PARD3, PPARG, RAB7B, TRIB1, PHLDB2, ZBTB46, LEF1, AMIGO2, PDGFB, NEDD4L, CXCR4, RASAL1, RETN, GATA2, PTGS2, HDAC9, THBS1, IL1RL2, FLRT2, GPC1, NLRP3, SLIT2, S1PR2, TBX1, JUN, BCL11A, P…	655	1089	16650	1.77402	0.00827372	0.000112272	0.000104081
GOTERM_BP_FAT	GO:0050865~regulation of cell activation	44	5.57668	1.32053e-06	PRR5, PLEK, EBI3, PDGFB, DTX1, NRARP, GATA2, THBS1, GLI3, SPN, IL1RL2, IL36B, SIT1, MYB, NLRP3, CCR7, MAP3K8, PAG1, RAG1, SNCA, SLAMF1, MEF2C, HLA-DRB5, ANXA1, CD300A, IL13, IL31RA, IGF2, AP3B1, INHBA, GAB2, SELP, FGR, MMP14, TMIGD2, ADORA2A, IL23A, CLCF1, F2RL1, XCL1, PRKCQ, CD24, CD200, ZP4	655	501	16650	2.23248	0.00859649	0.000114809	0.000106433
GOTERM_BP_FAT	GO:0009967~positive regulation of signal transduction	93	11.7871	1.33458e-06	PRR5, FOXA1, IL22, BMP10, CXCL9, CSF2, IL26, CCL4L2, GFI1, HTR2B, SLA, NRARP, PTPRJ, FASLG, PRL, EPS8, LASP1, RASSF2, CASP8, NETO1, CDH2, RUSC1, TNFSF10, CASP1, GRB10, MAP3K8, CCR7, LDLRAP1, PDE8A, IL6R, SOX4, MAP3K4, CCBE1, PTGIR, MEF2C, CD300A, IL1R1, IL13, ADRA2B, MID1, DUSP9, TNFRSF1A, FGR, STX1B, ADCYAP1, ADORA2A, IL23A, MAPKAPK2, XCL2, TLR9, XCL1, ATF3, SHC2, CCL3L1, PDGFB, NLRC5, CXCR4, LP…	655	1428	16650	1.65549	0.00868754	0.000114809	0.000106433
GOTERM_BP_FAT	GO:0040012~regulation of locomotion	59	7.47782	1.35735e-06	DOCK5, BMP10, CXCL9, PTPRJ, CXCL3, EPB41L4B, PLAU, C3AR1, CCR7, PLXNC1, IL6R, CCBE1, ANXA1, CD300A, IL1R1, RHOB, FGR, MMP14, ADORA2A, IL23A, GCSAML, XCL1, ITGA6, SGK1, TRIB1, PHLDB2, HDAC4, LAMA5, LEF1, PDGFB, CXCR4, ARHGAP18, STC1, RETN, PTGS2, HDAC9, THBS1, FLRT2, PDGFC, SLIT2, CGA, ZNF268, PLXNA4, SNCA, STARD13, JUN, ANGPT1, CCL20, ARHGEF39, MCAM, DAB2IP, TSHR, VEGFA, SELP, CXCL10, DAB2, F2RL1…	655	768	16650	1.95283	0.00883508	0.000115251	0.000106843
GOTERM_BP_FAT	GO:0010647~positive regulation of cell communication	99	12.5475	1.48808e-06	FOXA1, RAB3B, CSF2, CCL4L2, GFI1, SLA, SLC8A2, EPS8, RASSF2, CDH2, RUSC1, TNFSF10, GRB10, MAP3K8, PDE8A, IL6R, SOX4, MAP3K4, CCBE1, MEF2C, UNC13A, CD300A, IL1R1, MID1, STX1B, ADCYAP1, IL23A, MAPKAPK2, ATF3, SHC2, CCL3L1, PDGFB, LPAR4, BCL2L11, SOCS1, IRAK2, PDGFC, ZNF268, PAG1, NTSR1, SLAMF1, HLA-DRB5, JUN, JUP, GADD45A, IL31RA, LIF, IGF2, TNFRSF10A, INHBA, NFATC4, SELP, CXCL10, DAB2, LPAR6, BAMB…	655	1555	16650	1.61837	0.00968187	0.000124731	0.000115631
GOTERM_BP_FAT	GO:0071310~cellular response to organic substance	129	16.3498	1.55842e-06	FOXA1, CSF2, KDM1A, CCL4L2, GFI1, RORC, RORB, FGFRL1, IL36B, CREB3L1, GRB10, PIM1, PDE8A, IL6R, SOX4, CCBE1, MEF2C, IL1R1, IL1R2, MID1, ADCYAP1, COL4A1, PARD3, MAPKAPK2, PRKCQ, TRIB1, ATF3, CCL3L1, EBI3, PDGFB, STC1, FOXO1, BCL2L11, SOCS1, FLRT2, IRAK2, PDGFC, NLRP3, UGT3A2, IL36RN, ATP6V0A4, CGA, ZNF268, HLA-DRB5, JUN, JUP, TNFRSF9, PTCH1, IL31RA, IGF2, HMGA2, IL36G, TNFRSF10A, INHBA, GNG12, ESR…	655	2186	16650	1.50007	0.0101372	0.000128974	0.000119564
GOTERM_BP_FAT	GO:0043085~positive regulation of catalytic activity	99	12.5475	1.70863e-06	CSF2, DENND5B, CCL4L2, PREX2, CCND3, RASSF2, RGS3, CCND2, TNFSF10, PIM1, MAP3K8, IL6R, MAP3K4, MEF2C, CD300A, ATP1B1, MYL4, ADCYAP1, IL23A, MAPKAPK2, PRKCQ, CHRNA3, SPTBN5, SHC2, PARM1, CCL3L1, PDGFB, ARHGAP18, RASAL1, BCL2L11, SOCS1, IRAK2, PDGFC, NLRP3, EVI5, STARD13, JUN, GADD45A, ARHGEF39, IGF2, ARHGAP29, TNFRSF10A, ARHGAP25, CD24, FGF13, RYR2, ITK, DOCK5, CDKN1B, DOCK9, PLEK, C15ORF62, HTR2B…	655	1559	16650	1.61422	0.0111089	0.000139638	0.00012945
GOTERM_BP_FAT	GO:0040017~positive regulation of locomotion	39	4.94297	1.75355e-06	HDAC4, DOCK5, CXCL9, LEF1, PDGFB, RETN, CXCL3, PTGS2, HDAC9, THBS1, EPB41L4B, PLAU, PDGFC, C3AR1, CCR7, SLIT2, CGA, ZNF268, IL6R, CCBE1, JUN, ANGPT1, CCL20, IL1R1, MCAM, ARHGEF39, DAB2IP, RHOB, VEGFA, SELP, FGR, CXCL10, DAB2, MMP14, IL23A, F2RL1, XCL1, ITGA6, AMOTL1	655	422	16650	2.34923	0.0113992	0.000141539	0.000131213
GOTERM_BP_FAT	GO:0051336~regulation of hydrolase activity	88	11.1534	1.78587e-06	DOCK5, RYR2, ITK, CDKN1B, CSF2, DENND5B, DOCK9, CCL4L2, PLEK, C15ORF62, HTR2B, FASLG, PREX2, CASP8, RGS3, RASGEF1C, TAGAP, TNFSF10, CASP1, CCR7, RAG1, SPINK2, PTGIR, MEF2C, ANXA1, CD300A, RHOG, GFRA1, ATP1B1, PAX2, MYL4, ADCYAP1, MMP14, AIM2, ADORA2A, XCL2, TLR9, XCL1, ITGA6, PPARG, PLCB2, SPTBN5, SHC2, CSTA, CCL3L1, PCOLCE2, RGS16, LEF1, PDGFB, ARHGAP18, RASAL1, ASAP2, CST7, THBS1, FGD4, FGD5, B…	655	1337	16650	1.67311	0.0116081	0.00014239	0.000132002
GOTERM_BP_FAT	GO:0023056~positive regulation of signaling	99	12.5475	1.94772e-06	FOXA1, RAB3B, CSF2, CCL4L2, GFI1, SLA, SLC8A2, EPS8, RASSF2, CDH2, RUSC1, TNFSF10, GRB10, MAP3K8, PDE8A, IL6R, SOX4, MAP3K4, CCBE1, MEF2C, UNC13A, CD300A, IL1R1, MID1, STX1B, ADCYAP1, IL23A, MAPKAPK2, ATF3, SHC2, CCL3L1, PDGFB, LPAR4, BCL2L11, SOCS1, IRAK2, PDGFC, ZNF268, PAG1, NTSR1, SLAMF1, HLA-DRB5, JUN, JUP, GADD45A, IL31RA, LIF, IGF2, TNFRSF10A, INHBA, NFATC4, SELP, CXCL10, DAB2, LPAR6, BAMB…	655	1563	16650	1.61009	0.0126535	0.000153424	0.000142231
GOTERM_BP_FAT	GO:0035295~tube development	48	6.08365	2.0839e-06	FOXA1, LAMA5, RYR2, RARG, EPAS1, SLC23A1, LEF1, NRARP, ADM, GATA2, GLI3, BCL2L11, RDH10, PDGFC, DACT2, RBPMS2, SLIT2, SOX4, CTHRC1, VASP, TBX1, CCBE1, ARG2, STARD13, SPINK2, MEF2C, PTCH1, IL13, DAB2IP, LIF, HMGA2, MICAL2, KLHL3, PAX2, KLF2, RHOB, NFATC4, VEGFA, MMP14, CCKBR, COL4A1, WT1, ALDH1A2, ID1, SPRY2, PLXNB2, ITGA6, CD24	655	580	16650	2.10371	0.0135322	0.000162197	0.000150363
GOTERM_BP_FAT	GO:0098602~single organism cell adhesion	59	7.47782	2.14101e-06	PRR5, FOXA1, DOCK5, ITK, PLEK, RORC, NRARP, GLI3, FGFRL1, SPN, PPP3CA, CCND3, CASP8, IL36B, CDH2, SIT1, MYB, RAC3, MAP3K8, CCR7, SOX4, RAG1, EOMES, DSP, ANXA1, CD300A, AP3B1, TMIGD2, ADORA2A, IL23A, XCL1, CD48, ITGA6, PRKCQ, ZFPM1, ZP4, LAMA5, CSTA, SATB1, EBI3, LEF1, DTX1, PLG, CD1C, LY9, IL1RL2, PERP, NLRP3, PAG1, SLAMF1, HLA-DRB5, JUP, IGF2, BATF, SELP, CAMSAP3, F2RL1, CD24, FERMT2	655	779	16650	1.92525	0.0139005	0.000163518	0.000151588
GOTERM_BP_FAT	GO:2000147~positive regulation of cell motility	38	4.81622	2.1509e-06	HDAC4, DOCK5, CXCL9, LEF1, PDGFB, RETN, CXCL3, PTGS2, HDAC9, THBS1, EPB41L4B, PLAU, PDGFC, C3AR1, CCR7, CGA, ZNF268, IL6R, CCBE1, JUN, ANGPT1, CCL20, IL1R1, MCAM, ARHGEF39, DAB2IP, RHOB, VEGFA, SELP, FGR, CXCL10, DAB2, MMP14, IL23A, F2RL1, XCL1, ITGA6, AMOTL1	655	409	16650	2.36175	0.0139642	0.000163518	0.000151588
GOTERM_BP_FAT	GO:0051345~positive regulation of hydrolase activity	66	8.36502	2.67903e-06	DOCK5, RYR2, ITK, CDKN1B, CSF2, DENND5B, DOCK9, CCL4L2, PLEK, C15ORF62, HTR2B, FASLG, PREX2, CASP8, RGS3, RASGEF1C, TAGAP, TNFSF10, CASP1, CCR7, PTGIR, MEF2C, CD300A, RHOG, GFRA1, ATP1B1, MYL4, ADCYAP1, MMP14, AIM2, XCL2, XCL1, ITGA6, PPARG, PLCB2, SPTBN5, SHC2, CCL3L1, PCOLCE2, RGS16, PDGFB, ARHGAP18, RASAL1, ASAP2, FGD4, FGD5, BCL2L11, PERP, PLEKHG4B, NLRP3, EPS8L2, EVI5, SNCA, STARD13, JUN, EG…	655	917	16650	1.82956	0.017363	0.000201327	0.000186639
GOTERM_BP_FAT	GO:0002237~response to molecule of bacterial origin	32	4.05577	2.76435e-06	CXCL9, CSF2, CEBPE, GFI1, ADM, FASLG, CXCL3, PTGS2, CASP8, IRAK2, CASP1, NLRP3, CCR7, SNCA, JUN, PTGIR, MEF2C, CCL20, TNFRSF9, PDE4D, IL13, DAB2IP, TNFRSF10A, GNG12, TNFRSF10D, TNFRSF1A, SELP, CXCL10, MAPKAPK2, TLR9, CD24, TRIB1	655	316	16650	2.57416	0.017911	0.000205379	0.000190395
GOTERM_BP_FAT	GO:0002684~positive regulation of immune system process	68	8.6185	3.15337e-06	PRR5, ITK, CXCL9, KDM1A, PTPRJ, CXCL3, GLI3, SPN, CASP8, IL36B, MYB, C3AR1, MAP3K8, CCR7, IL6R, RAG1, MEF2C, ANXA1, CD300A, IL1R1, PDE4D, KRT1, IL13, AP3B1, GAB2, LAT2, CLEC4A, FGR, MMP14, TMIGD2, AIM2, IL23A, MAPKAPK2, GCSAML, TLR9, XCL1, PRKCQ, RAB7B, TRIB1, ZP4, ZBTB46, EBI3, LEF1, NLRC5, GATA2, THBS1, IL1RL2, IRAK2, CD19, SUSD4, NLRP3, PAG1, SLAMF1, JUN, HLA-DRB5, CCL20, PLCL2, DAB2IP, LIF, I…	655	960	16650	1.80057	0.0204057	0.000231649	0.000214748
GOTERM_BP_FAT	GO:0010604~positive regulation of macromolecule metabolic process	158	20.0253	3.40889e-06	FOXA1, CSF2, KDM1A, CCL4L2, RORC, IKZF1, RORB, IKZF4, CCND3, RASSF2, CCND2, CDH2, CREB3L1, MYB, TNFSF10, PIM1, MAP3K8, PDE8A, IL6R, SOX4, MAP3K4, EOMES, CCBE1, MEF2C, TLE1, CD300A, ATP1B4, ANK2, RUNX3, MID1, ADCYAP1, ASTL, IL23A, MAPKAPK2, PRKCQ, TRIB1, TRIB2, ZFPM1, ATF3, CHRNA3, SHC2, PARM1, CCL3L1, EPAS1, EBI3, PDGFB, NEDD4L, GATA2, FOXO1, BCL2L11, SOCS1, IRAK2, PDGFC, NLRP3, CGA, SLC38A3, ZNF…	655	2856	16650	1.40628	0.0220409	0.00024645	0.00022847
GOTERM_BP_FAT	GO:0002694~regulation of leukocyte activation	41	5.19645	3.43025e-06	PRR5, EBI3, DTX1, NRARP, GATA2, THBS1, GLI3, SPN, IL1RL2, IL36B, SIT1, MYB, NLRP3, CCR7, MAP3K8, PAG1, RAG1, SNCA, SLAMF1, MEF2C, HLA-DRB5, ANXA1, CD300A, IL13, IL31RA, IGF2, AP3B1, INHBA, GAB2, FGR, MMP14, TMIGD2, ADORA2A, IL23A, CLCF1, F2RL1, XCL1, PRKCQ, CD24, CD200, ZP4	655	468	16650	2.22695	0.0221774	0.00024645	0.00022847
GOTERM_BP_FAT	GO:2000145~regulation of cell motility	56	7.09759	3.60708e-06	DOCK5, BMP10, CXCL9, PTPRJ, CXCL3, EPB41L4B, PLAU, C3AR1, CCR7, PLXNC1, IL6R, CCBE1, ANXA1, CD300A, IL1R1, RHOB, FGR, MMP14, IL23A, GCSAML, XCL1, ITGA6, SGK1, TRIB1, PHLDB2, HDAC4, LAMA5, LEF1, PDGFB, CXCR4, ARHGAP18, STC1, RETN, PTGS2, HDAC9, THBS1, FLRT2, PDGFC, SLIT2, CGA, ZNF268, PLXNA4, STARD13, JUN, ANGPT1, CCL20, ARHGEF39, MCAM, DAB2IP, VEGFA, SELP, CXCL10, DAB2, F2RL1, PLXNB2, AMOTL1	655	736	16650	1.93412	0.0233072	0.000256338	0.000237636
GOTERM_BP_FAT	GO:0051272~positive regulation of cellular component movement	38	4.81622	4.00437e-06	HDAC4, DOCK5, CXCL9, LEF1, PDGFB, RETN, CXCL3, PTGS2, HDAC9, THBS1, EPB41L4B, PLAU, PDGFC, C3AR1, CCR7, CGA, ZNF268, IL6R, CCBE1, JUN, ANGPT1, CCL20, IL1R1, MCAM, ARHGEF39, DAB2IP, RHOB, VEGFA, SELP, FGR, CXCL10, DAB2, MMP14, IL23A, F2RL1, XCL1, ITGA6, AMOTL1	655	420	16650	2.29989	0.0258409	0.000281512	0.000260973
GOTERM_BP_FAT	GO:0048585~negative regulation of response to stimulus	88	11.1534	4.6566e-06	CSF2, KDM1A, WWC2, PLEK, HTR2B, NRARP, ADM, PTPRJ, FASLG, CHRDL1, GLI3, SPN, PPP3CA, RASSF2, CASP8, RGS3, CDH2, PLAU, CREB3L1, SIX3, WWC3, TNFSF10, RBPMS2, DACT2, GRB10, DACT3, CHAC1, PDE8A, DUSP4, PTGIR, ANXA1, TLE1, CD300A, IL1R2, KRT1, DUSP9, TNFRSF1A, ADCYAP1, MMP14, ADORA2A, TLR9, XCL1, ITGA6, PRKCQ, PPARG, RAB7B, TRIB1, PHLDB2, ATF3, RGS16, LEF1, PDGFB, NLRC5, ITPR1, PLG, RASAL1, GATA2, THB…	655	1369	16650	1.634	0.0299862	0.000323882	0.000300252
GOTERM_BP_FAT	GO:0030098~lymphocyte differentiation	31	3.92902	5.26455e-06	HDAC4, ITK, SATB1, LEF1, RORC, DTX1, NRARP, IKZF1, HDAC9, LY9, GLI3, SPN, IL1RL2, IL36B, MYB, NLRP3, CCR7, SOX4, RAG1, SLAMF1, EOMES, ANXA1, PLCL2, AP3B1, INHBA, TSHR, BATF, MMP14, IL23A, CLCF1, ZFPM1	655	310	16650	2.54198	0.0338341	0.000362312	0.000335878
GOTERM_BP_FAT	GO:0006915~apoptotic process	106	13.4347	5.35309e-06	CSF2, KDM1A, PRF1, RORC, RASSF2, CCND2, CREB3L1, TNFSF10, PIM1, MAP3K8, CHAC1, TNS4, PHLDA1, IL6R, SOX4, RAG1, SPINK2, MEF2C, TLE1, ADCYAP1, BIN1, TXNIP, PRKCQ, ATF3, ITPR1, FOXO1, BCL2L11, ZMAT1, NLRP3, ZNF268, NTSR1, PLK3, JUN, GADD45A, TNFRSF9, IL31RA, OSGIN1, HMGA2, TNFRSF10A, INHBA, TNFRSF10D, NFATC4, DAB2, ID1, ID3, CD24, GABRB3, GABRB2, RYR2, RARG, CDKN1B, HTR2B, FASLG, ADM, ATP2A1, DBH, H…	655	1747	16650	1.54236	0.0343932	0.000364568	0.00033797
GOTERM_BP_FAT	GO:0002696~positive regulation of leukocyte activation	31	3.92902	5.60706e-06	PRR5, EBI3, GATA2, THBS1, GLI3, SPN, IL1RL2, IL36B, MYB, NLRP3, CCR7, MAP3K8, RAG1, SLAMF1, MEF2C, HLA-DRB5, ANXA1, IL13, IGF2, AP3B1, GAB2, FGR, MMP14, TMIGD2, IL23A, CLCF1, F2RL1, XCL1, PRKCQ, CD24, ZP4	655	311	16650	2.53381	0.0359953	0.000377928	0.000350355
GOTERM_BP_FAT	GO:0048699~generation of neurons	87	11.0266	5.97851e-06	GABRB3, FOXA1, GABRB2, TENM4, KDM1A, GFI1, RAPH1, ADM, RORB, PTPRF, GLI3, PREX2, PPP3CA, CDH4, CDH2, SIX3, NCS1, RAC3, PLXNC1, ZNF521, SOX4, EOMES, MEF2C, UNC13A, NAV1, MYO7A, ADRA2B, RUNX3, ETV5, PAX2, STX1B, ADCYAP1, ADORA2A, BIN1, ALDH1A2, PARD3, TLR9, HOXB3, PRKCQ, PPARG, SGK1, BRSK1, SPTBN5, CHRNA3, LEF1, NEDD4L, CXCR4, DTX1, RASAL1, PCDH12, ADCY1, GATA2, HDAC9, CAMSAP2, FLRT2, GPC1, SLIT1, …	655	1357	16650	1.62972	0.0383336	0.000398852	0.000369753
GOTERM_BP_FAT	GO:1903708~positive regulation of hemopoiesis	21	2.6616	6.32706e-06	JUN, ANXA1, KDM1A, ZBTB46, LEF1, LIF, AP3B1, INHBA, TMEM64, GATA2, GLI3, MMP14, IL1RL2, CASP8, IL36B, IL23A, MYB, NLRP3, RAB7B, TRIB1, RAG1	655	163	16650	3.27495	0.0405225	0.000417842	0.000387357
GOTERM_BP_FAT	GO:0043408~regulation of MAPK cascade	52	6.59062	6.65537e-06	BMP10, IL26, CCL4L2, HTR2B, PTPRJ, RASSF2, RGS3, CDH2, MAP3K8, CCR7, PDE8A, IL6R, MAP3K4, DUSP4, MEF2C, CD300A, ADRA2B, MID1, DUSP9, ADCYAP1, MAPKAPK2, XCL2, TLR9, XCL1, TRIB1, TRIB2, ATF3, SHC2, CCL3L1, PDGFB, CXCR4, THBS1, FOXO1, IRAK2, PDGFC, S1PR2, SLAMF1, TBX1, JUN, CCL22, ANGPT1, CCL20, GADD45A, DAB2IP, LIF, IGF2, INHBA, VEGFA, ID1, SPRY2, F2RL1, CD24	655	678	16650	1.9496	0.0425798	0.000432992	0.000401401
GOTERM_BP_FAT	GO:0007417~central nervous system development	64	8.11153	6.71366e-06	PRDM8, TENM4, KDM1A, SLC23A1, GLI3, AFF2, CDH2, ZIC2, MDK, SIX3, RAC3, JARID2, SOX4, EOMES, MEF2C, SLC32A1, AVPR2, KCNAB1, SSTR3, PAX2, ADCYAP1, ADORA2A, COL4A1, BIN1, ALDH1A2, ARMC4, HOXB3, PPARG, INA, BCL2A1, LEF1, CXCR4, LRP2, GATA2, PCDH18, BCL2L11, PDGFC, SLIT1, SLIT2, SLC38A3, PLXNA4, TBX1, ARNT2, CDKN2C, PCDH9, PTCH1, DAB2IP, LIF, HMGA2, ATP2B2, INHBA, GNG12, MYO16, XAB2, EFNA2, CLCF1, ID1…	655	904	16650	1.79964	0.0429447	0.000432992	0.000401401
GOTERM_BP_FAT	GO:0051246~regulation of protein metabolic process	141	17.8707	6.75515e-06	CSF2, KDM1A, CCL4L2, GFI1, CCND3, RASSF2, RGS3, CCND2, CDH2, MYB, TNFSF10, PIM1, C3AR1, MAP3K8, CHAC1, PDE8A, IL6R, SOX4, MAP3K4, RAG1, CCBE1, SPINK2, MEF2C, CD300A, IL1R2, MID1, ADCYAP1, ASTL, IL23A, PARD3, MAPKAPK2, PRKCQ, TRIB1, TRIB2, ZFPM1, ATF3, CHRNA3, SHC2, CCL3L1, EBI3, PDGFB, NEDD4L, GATA2, FBXO43, FOXO1, UBE2J1, BCL2L11, SOCS1, FLRT2, IRAK2, PDGFC, NLRP3, ZNF268, SLAMF1, PLK3, JUN, GAD…	655	2512	16650	1.42683	0.0432042	0.000432992	0.000401401
GOTERM_BP_FAT	GO:0009719~response to endogenous stimulus	96	12.1673	6.86078e-06	GABRB3, FOXA1, GABRB2, IL22, RYR2, RARG, BMP10, CDKN1B, KDM1A, RORC, ADM, RORB, DBH, PRL, SLC2A4, CHRDL1, FGFRL1, PPP3CA, MDK, KYNU, TNFSF10, RBPMS2, CASP1, GRB10, CCR7, PDE8A, PTGIR, MEF2C, ANXA1, PDE4D, IL13, AVPR2, SORD, DNTT, RUNX3, SSTR3, PAX2, ADCYAP1, MMP14, ADORA2A, COL4A1, PARD3, TXNIP, XCL1, PRKCQ, PPARG, AGXT, HDAC4, RNASEL, CHRNA3, CHRNA6, LEF1, PDGFB, AKAP7, STC1, RETN, ADCY1, PTGS2,…	655	1548	16650	1.57642	0.0438648	0.000435493	0.00040372
GOTERM_BP_FAT	GO:0008284~positive regulation of cell proliferation	61	7.73131	7.32287e-06	RARG, BMP10, CDKN1B, CSF2, KDM1A, HTR2B, NRARP, ADM, FASLG, GLI3, SPN, CCND2, RBPMS2, IL6R, SOX4, MEF2C, ANXA1, IL13, AVPR2, RHOG, GAB2, ETV5, PAX2, ADCYAP1, TMIGD2, CCKBR, IL23A, ALDH1A2, XCL1, PRKCQ, ATF3, ZP4, HDAC4, EBI3, LEF1, PDGFB, RETN, VWCE, PTGS2, THBS1, PDGFC, S1PR2, CGA, ZNF268, CTHRC1, SLAMF1, TBX1, ARNT2, JUN, LIF, IL31RA, IGF2, HMGA2, TSHR, FOSL2, VEGFA, CXCL10, BAMBI, CLCF1, ID1, …	655	849	16650	1.8264	0.0467491	0.000460355	0.000426768
GOTERM_BP_FAT	GO:0060284~regulation of cell development	61	7.73131	7.90717e-06	FOXA1, DOCK5, BMP10, TENM4, KDM1A, GFI1, PTPRF, GLI3, NPPC, PPP3CA, CDH4, CDH2, SIX3, NCS1, DACT3, RAC3, PLXNC1, EOMES, MEF2C, UNC13A, ADRA2B, ETV5, PAX2, TNFRSF1A, STX1B, ADCYAP1, BIN1, HOXB3, PPARG, TRIB1, PHLDB2, HDAC4, CHRNA3, LEF1, NEDD4L, CXCR4, DTX1, RASAL1, GATA2, HDAC9, FLRT2, SLIT1, SLIT2, S1PR2, PLXNA4, BCL11A, DAB2IP, LIF, HMGA2, L1CAM, SSH3, NFATC4, VEGFA, SDK1, DAB2, BAMBI, CLCF1, I…	655	851	16650	1.8221	0.0503837	0.000492353	0.000456432
GOTERM_BP_FAT	GO:0043410~positive regulation of MAPK cascade	41	5.19645	8.09352e-06	SHC2, CCL3L1, IL26, CCL4L2, HTR2B, PDGFB, CXCR4, THBS1, RASSF2, CDH2, IRAK2, PDGFC, CCR7, MAP3K8, S1PR2, PDE8A, IL6R, MAP3K4, SLAMF1, TBX1, JUN, MEF2C, CCL22, ANGPT1, CCL20, GADD45A, DAB2IP, LIF, IGF2, ADRA2B, MID1, DUSP9, VEGFA, ADCYAP1, MAPKAPK2, TLR9, XCL2, SPRY2, F2RL1, XCL1, CD24	655	485	16650	2.14889	0.05154	0.000499202	0.000462781
GOTERM_BP_FAT	GO:0032268~regulation of cellular protein metabolic process	133	16.8568	8.28212e-06	CSF2, KDM1A, CCL4L2, GFI1, CCND3, RASSF2, RGS3, CCND2, CDH2, MYB, TNFSF10, PIM1, MAP3K8, CHAC1, PDE8A, IL6R, SOX4, MAP3K4, RAG1, CCBE1, SPINK2, MEF2C, CD300A, IL1R2, MID1, ADCYAP1, ASTL, IL23A, PARD3, MAPKAPK2, TRIB1, TRIB2, ATF3, CHRNA3, SHC2, CCL3L1, PDGFB, GATA2, FBXO43, FOXO1, BCL2L11, SOCS1, FLRT2, IRAK2, PDGFC, NLRP3, ZNF268, SLAMF1, PLK3, JUN, GADD45A, IL31RA, CRIM1, LIF, IGF2, TNFRSF10A, …	655	2346	16650	1.44111	0.0527088	0.000506061	0.00046914
GOTERM_BP_FAT	GO:0032496~response to lipopolysaccharide	30	3.80228	8.74096e-06	CXCL9, CSF2, CEBPE, GFI1, ADM, FASLG, CXCL3, PTGS2, CASP8, IRAK2, CASP1, NLRP3, CCR7, SNCA, JUN, PTGIR, MEF2C, CCL20, TNFRSF9, PDE4D, IL13, DAB2IP, TNFRSF10A, GNG12, TNFRSF10D, TNFRSF1A, SELP, CXCL10, MAPKAPK2, TRIB1	655	302	16650	2.52515	0.0555463	0.000529152	0.000490546
GOTERM_BP_FAT	GO:0045860~positive regulation of protein kinase activity	40	5.06971	9.22721e-06	SHC2, CHRNA3, CDKN1B, HTR2B, PDGFB, CXCR4, ADCY1, THBS1, CCND3, SOCS1, RASSF2, CCND2, IRAK2, PDGFC, PIM1, CCR7, MAP3K8, S1PR2, IL6R, MAP3K4, SNCA, MEF2C, ANGPT1, GADD45A, CD300A, DAB2IP, IGF2, TNFRSF10A, ADRA2B, DUSP9, VEGFA, ADCYAP1, PSRC1, IL23A, MAPKAPK2, TLR9, SPRY2, CD24, FGF13, ZP4	655	470	16650	2.16339	0.0585441	0.000553463	0.000513084
GOTERM_BP_FAT	GO:0031328~positive regulation of cellular biosynthetic process	104	13.1812	9.47408e-06	FOXA1, CSF2, KDM1A, RORC, IKZF1, RORB, IKZF4, NPPC, CREB3L1, MYB, SOX4, MAP3K4, EOMES, MEF2C, ATP1B4, RUNX3, ADCYAP1, IL23A, MAPKAPK2, PRKCQ, ZFPM1, ATF3, PARM1, EPAS1, EBI3, PDGFB, GATA2, FOXO1, PDGFC, NLRP3, CGA, SLC38A3, ZNF268, NTSR1, JUN, BCL11A, PTCH1, IL31RA, LIF, IGF2, HMGA2, MICAL2, INHBA, MAFA, ESR2, FOSL2, NFATC4, CXCL10, DAB2, BAMBI, HOXD8, RARG, BMP10, IL26, HTR2B, ADM, HOXC13, GLI3,…	655	1729	16650	1.52901	0.0600625	0.000563105	0.000522022
GOTERM_BP_FAT	GO:0097530~granulocyte migration	17	2.15463	9.59793e-06	ANXA1, CCL22, CCL3L1, IL1R1, CD300A, CCL20, PDE4D, CCL4L2, CXCL3, THBS1, VEGFA, IL23A, C3AR1, XCL2, XCL1, CCR7, SLIT2	655	114	16650	3.79068	0.0608232	0.000565326	0.000524081
GOTERM_BP_FAT	GO:0016337~single organismal cell-cell adhesion	54	6.84411	9.90234e-06	PRR5, FOXA1, ITK, PLEK, RORC, NRARP, GLI3, SPN, PPP3CA, CCND3, CASP8, IL36B, CDH2, SIT1, MYB, MAP3K8, CCR7, SOX4, RAG1, EOMES, DSP, ANXA1, CD300A, AP3B1, TMIGD2, ADORA2A, IL23A, XCL1, CD48, ITGA6, PRKCQ, ZFPM1, ZP4, CSTA, SATB1, EBI3, LEF1, DTX1, PLG, CD1C, LY9, IL1RL2, PERP, NLRP3, PAG1, SLAMF1, HLA-DRB5, JUP, IGF2, BATF, SELP, CAMSAP3, F2RL1, CD24	655	725	16650	1.89334	0.0626905	0.000578049	0.000535876
GOTERM_BP_FAT	GO:0051049~regulation of transport	107	13.5615	1.06833e-05	RAB3B, CDH2, LIPG, GRB10, SOX4, MEF2C, UNC13A, CD300A, IL1R2, ANK2, ATP1B1, SYTL3, STX1B, ADCYAP1, BIN1, IL23A, KCNQ3, CHRNA3, CHRNA6, PDGFB, ITPR1, NEDD4L, STC1, C2CD4C, GATA2, UBE2J1, CACNA1I, BCL2L11, SOCS1, CD19, NLRP3, KCNMB4, IL36RN, SLC38A3, ZNF268, EVI5, PLTP, NTSR1, SLAMF1, NUS1, PLK3, HLA-DRB5, JUP, TNFRSF9, CYP4F2, PTCH1, LIF, HMGA2, TRPV3, INHBA, REEP1, CXCL10, DAB2, GRIN3B, EHD4, BAM…	655	1796	16650	1.51443	0.0674641	0.000618117	0.00057302
GOTERM_BP_FAT	GO:0070887~cellular response to chemical stimulus	146	18.5044	1.13275e-05	FOXA1, CSF2, KDM1A, CCL4L2, GFI1, RORC, RORB, FGFRL1, IL36B, CREB3L1, GRB10, PIM1, C3AR1, PDE8A, IL6R, SOX4, CCBE1, MEF2C, IL1R1, IL1R2, MID1, ADCYAP1, COL4A1, IL23A, PARD3, MAPKAPK2, PRKCQ, TRIB1, ATF3, CCL3L1, EPAS1, EBI3, PDGFB, STC1, FOXO1, BCL2L11, SOCS1, FLRT2, IRAK2, PDGFC, NLRP3, UGT3A2, IL36RN, ATP6V0A4, CGA, ZNF268, PLXNA4, PLK3, HLA-DRB5, JUN, JUP, EPHX2, TNFRSF9, PTCH1, IL31RA, IGF2, …	655	2648	16650	1.40155	0.0713836	0.000642055	0.000595212
GOTERM_BP_FAT	GO:1904894~positive regulation of STAT cascade	14	1.7744	1.13916e-05	IL22, CSF2, CD300A, IL26, IL13, LIF, IL31RA, PRL, TNFRSF1A, VEGFA, SOCS1, IL23A, CLCF1, IL6R	655	79	16650	4.50478	0.0717729	0.000642055	0.000595212
GOTERM_BP_FAT	GO:0046427~positive regulation of JAK-STAT cascade	14	1.7744	1.13916e-05	IL22, CSF2, CD300A, IL26, IL13, LIF, IL31RA, PRL, TNFRSF1A, VEGFA, SOCS1, IL23A, CLCF1, IL6R	655	79	16650	4.50478	0.0717729	0.000642055	0.000595212
GOTERM_BP_FAT	GO:0000122~negative regulation of transcription from RNA polymerase II promoter	55	6.97085	1.17782e-05	FOXA1, RARG, KDM1A, GFI1, WWC2, NRARP, FASLG, IKZF1, GLI3, MYB, WWC3, JARID2, EOMES, HES6, MEF2C, TLE1, TSC22D3, ZBTB32, ARID5B, RUNX3, ETV6, ZEB2, TXNIP, HOXB3, PPARG, ZFPM1, ATF3, HDAC4, SATB1, LEF1, PDGFB, NEDD4L, GATA2, HDAC9, FOXO1, PURB, PCBP3, ZNF268, SNCA, PLK3, JUN, BCL11A, PTCH1, DAB2IP, HMGA2, ESR2, NFATC4, VEGFA, PER3, WT1, ID1, ID3, ZNF217, BCOR, HOXD8	655	748	16650	1.86911	0.0741161	0.00065817	0.000610151
GOTERM_BP_FAT	GO:0000904~cell morphogenesis involved in differentiation	55	6.97085	1.41572e-05	FOXA1, DOCK5, RAPH1, GLI3, FGFRL1, PREX2, PPP3CA, CDH4, DACT2, DACT3, RAC3, PLXNC1, EOMES, MEF2C, MYO7A, PAX2, PARD3, MATN1, TLR9, PRKCQ, ZFPM1, PHLDB2, LAMA5, BRSK1, SPTBN5, CHRNA3, LEF1, STC1, ADCY1, FLRT2, GPC1, SLIT1, FLNB, SLIT2, PLXNA4, VASP, BCL11A, DAB2IP, LIF, HMGA2, ATP2B2, L1CAM, SSH3, NFATC4, VEGFA, EFNA3, DAB2, EFNA2, WT1, BAMBI, ID1, UST, PLXNB2, FGF13, FERMT2	655	753	16650	1.8567	0.0884057	0.000784403	0.000727175
GOTERM_BP_FAT	GO:0032940~secretion by cell	66	8.36502	1.45499e-05	RAB3B, IL26, PLEK, HTR2B, ADM, PPP3CA, CREB3L1, NCS1, CASP1, CCR7, SOX4, SRGN, MEF2C, ANXA1, UNC13A, SLC32A1, CD300A, IL1R2, IL13, GAB2, ADRA2B, SYN2, SYTL3, F5, LAT2, FGR, STX1B, ADCYAP1, OLFM2, AIM2, ADORA2A, TLR9, ZP4, BRSK1, CHRNA3, CHRNA6, PDGFB, ITPR1, PLG, RETN, C2CD4C, GATA2, THBS1, CACNA1I, SOCS1, OTOF, KCNMB4, NLRP3, IL36RN, CGA, NTSR1, SNCA, SLAMF1, HLA-DRB5, ANGPT1, GAD1, TNFRSF9, LIF…	655	966	16650	1.73676	0.0907435	0.000799389	0.000741068
GOTERM_BP_FAT	GO:0030182~neuron differentiation	79	10.0127	1.4675e-05	GABRB3, FOXA1, GABRB2, TENM4, KDM1A, GFI1, RAPH1, ADM, RORB, PTPRF, GLI3, PREX2, PPP3CA, CDH4, SIX3, NCS1, RAC3, PLXNC1, ZNF521, SOX4, EOMES, MEF2C, UNC13A, MYO7A, ADRA2B, RUNX3, ETV5, PAX2, STX1B, ADCYAP1, ADORA2A, ALDH1A2, PARD3, TLR9, PRKCQ, SGK1, BRSK1, SPTBN5, CHRNA3, LEF1, NEDD4L, DTX1, RASAL1, PCDH12, ADCY1, GATA2, HDAC9, CAMSAP2, FLRT2, GPC1, SLIT1, SLIT2, PLXNA4, CTHRC1, VASP, JUN, BCL11…	655	1226	16650	1.63798	0.0914866	0.000799541	0.000741208
GOTERM_BP_FAT	GO:0006935~chemotaxis	44	5.57668	1.52674e-05	SPTBN5, CXCL9, CCL3L1, CCL4L2, LEF1, PDGFB, CXCR4, PTPRJ, LSP1, CXCL3, THBS1, GLI3, TYMP, SPN, CDH4, FLRT2, PLAU, GPC1, C3AR1, SLIT1, CCR7, SLIT2, PLXNC1, IL6R, PLXNA4, VASP, CCL22, ANXA1, ANGPT1, CCL20, PDE4D, RHOG, L1CAM, VEGFA, CXCL10, EFNA3, EFNA2, IL23A, XCL2, F2RL1, PLXNB2, XCL1, PRKCQ, CMTM2	655	552	16650	2.02622	0.0949989	0.000824945	0.000764759
GOTERM_BP_FAT	GO:0097529~myeloid leukocyte migration	20	2.53485	1.57189e-05	ANXA1, CCL22, CCL3L1, IL1R1, CD300A, CCL20, PDE4D, CCL4L2, PDGFB, CXCL3, THBS1, VEGFA, CXCL10, IL23A, C3AR1, XCL2, XCL1, CCR7, SLIT2, IL6R	655	159	16650	3.19747	0.0976665	0.000842379	0.000780921
GOTERM_BP_FAT	GO:0042330~taxis	44	5.57668	1.59861e-05	SPTBN5, CXCL9, CCL3L1, CCL4L2, LEF1, PDGFB, CXCR4, PTPRJ, LSP1, CXCL3, THBS1, GLI3, TYMP, SPN, CDH4, FLRT2, PLAU, GPC1, C3AR1, SLIT1, CCR7, SLIT2, PLXNC1, IL6R, PLXNA4, VASP, CCL22, ANXA1, ANGPT1, CCL20, PDE4D, RHOG, L1CAM, VEGFA, CXCL10, EFNA3, EFNA2, IL23A, XCL2, F2RL1, PLXNB2, XCL1, PRKCQ, CMTM2	655	553	16650	2.02256	0.0992411	0.00084973	0.000787735
GOTERM_BP_FAT	GO:0019932~second-messenger-mediated signaling	25	3.16857	1.62853e-05	HDAC4, RYR2, CXCL9, MCTP1, PLEK, HTR2B, ITPR1, CXCR4, ADM, ADCY1, THBS1, PPP3CA, INPP5A, PTGIR, CCL20, PDE4D, ANK2, ATP1B1, MAFA, NFATC4, SELP, LAT2, CXCL10, ADCYAP1, RCAN3	655	233	16650	2.72745	0.101001	0.000858654	0.000796008
GOTERM_BP_FAT	GO:0060322~head development	53	6.71736	1.687e-05	RARG, KDM1A, SLC23A1, GLI3, AFF2, CDH2, ZIC2, MDK, SIX3, RAC3, EOMES, MEF2C, SLC32A1, AVPR2, ARID5B, KCNAB1, SSTR3, PAX2, ADCYAP1, CRISPLD1, COL4A1, ALDH1A2, ARMC4, HOXB3, INA, BCL2A1, LEF1, LRP2, GATA2, PCDH18, BCL2L11, SLIT1, SLIT2, SLC38A3, PLXNA4, TBX1, ARNT2, PCDH9, PTCH1, DAB2IP, HMGA2, ATP2B2, INHBA, GNG12, MYO16, XAB2, EFNA2, ID1, CD9, LHX6, PLXNB2, FGF13, MDGA1	655	720	16650	1.87118	0.104432	0.000882366	0.00081799
GOTERM_BP_FAT	GO:0022603~regulation of anatomical structure morphogenesis	70	8.87199	1.7663e-05	FOXA1, DOCK5, BMP10, CXCL9, TENM4, C15ORF62, NRARP, ADM, FASLG, EPS8, PPP3CA, CDH4, STAB1, C3AR1, DACT3, RAC3, PLXNC1, CCBE1, MEF2C, ANXA1, UNC13A, KRT1, ETV5, PAX2, RHOB, FGR, TMIGD2, GAS2, RHOU, PHLDB2, CHRNA3, LEF1, NEDD4L, ARHGAP18, ATP10A, RASAL1, GATA2, PTGS2, HDAC9, THBS1, FGD4, FGD5, STRIP2, SLIT1, SLIT2, EVI5, PLXNA4, CTHRC1, TBX1, STARD13, BCL11A, DAB2IP, LIF, HMGA2, DDHD1, L1CAM, SSH3,…	655	1051	16650	1.69304	0.109063	0.000916512	0.000849645
GOTERM_BP_FAT	GO:0035239~tube morphogenesis	32	4.05577	1.95327e-05	FOXA1, LAMA5, RYR2, RARG, LEF1, NRARP, ADM, GLI3, BCL2L11, RDH10, RBPMS2, SLIT2, SOX4, CTHRC1, VASP, TBX1, STARD13, MEF2C, PTCH1, DAB2IP, HMGA2, MICAL2, KLHL3, PAX2, RHOB, NFATC4, VEGFA, MMP14, COL4A1, WT1, SPRY2, PLXNB2	655	348	16650	2.33746	0.119888	0.00100555	0.000932187
GOTERM_BP_FAT	GO:0033674~positive regulation of kinase activity	41	5.19645	2.07274e-05	SHC2, CHRNA3, CDKN1B, HTR2B, PDGFB, CXCR4, ADCY1, THBS1, CCND3, SOCS1, RASSF2, CCND2, IRAK2, PDGFC, PIM1, CCR7, MAP3K8, S1PR2, IL6R, MAP3K4, SNCA, MEF2C, ANGPT1, GADD45A, CD300A, DAB2IP, IGF2, TNFRSF10A, ADRA2B, DUSP9, VEGFA, FGR, ADCYAP1, PSRC1, IL23A, MAPKAPK2, TLR9, SPRY2, CD24, FGF13, ZP4	655	505	16650	2.06379	0.126736	0.00105872	0.000981477
GOTERM_BP_FAT	GO:0009891~positive regulation of biosynthetic process	104	13.1812	2.14536e-05	FOXA1, CSF2, KDM1A, RORC, IKZF1, RORB, IKZF4, NPPC, CREB3L1, MYB, SOX4, MAP3K4, EOMES, MEF2C, ATP1B4, RUNX3, ADCYAP1, IL23A, MAPKAPK2, PRKCQ, ZFPM1, ATF3, PARM1, EPAS1, EBI3, PDGFB, GATA2, FOXO1, PDGFC, NLRP3, CGA, SLC38A3, ZNF268, NTSR1, JUN, BCL11A, PTCH1, IL31RA, LIF, IGF2, HMGA2, MICAL2, INHBA, MAFA, ESR2, FOSL2, NFATC4, CXCL10, DAB2, BAMBI, HOXD8, RARG, BMP10, IL26, HTR2B, ADM, HOXC13, GLI3,…	655	1760	16650	1.50208	0.130872	0.00108732	0.00100799
GOTERM_BP_FAT	GO:0051050~positive regulation of transport	63	7.98479	2.21594e-05	RAB3B, RYR2, CXCL9, IL26, HTR2B, GLI3, PPP3CA, CASP8, CDH2, LIPG, NCS1, CASP1, LDLRAP1, SOX4, ANXA1, UNC13A, IL13, ANK2, GAB2, ATP1B1, FGR, STX1B, ADCYAP1, AIM2, ADORA2A, IL23A, TLR9, XCL1, PPARG, RHOU, SGK1, RNASEL, PDGFB, NEDD4L, AKAP7, STC1, RETN, GATA2, PTGS2, CACNA1I, BCL2L11, CD19, NLRP3, SLC38A3, ZNF268, PLTP, NTSR1, SNCA, SLAMF1, PLK3, HLA-DRB5, JUP, ANGPT1, CYP4F2, PTCH1, TRPV3, ATP2B2, …	655	920	16650	1.74071	0.134874	0.00111445	0.00103314
GOTERM_BP_FAT	GO:0001819~positive regulation of cytokine production	34	4.30925	2.44309e-05	CSF2, IL26, EBI3, HTR2B, PTGS2, THBS1, LY9, SPN, IL1RL2, IL36B, CASP1, C3AR1, NLRP3, CCR7, IL6R, SLAMF1, CCBE1, ANXA1, CCL20, PDE4D, IL13, NFATC4, FGR, ADCYAP1, AIM2, TMIGD2, IL23A, MAPKAPK2, TLR9, F2RL1, XCL1, PRKCQ, RAB7B, ZFPM1	655	386	16650	2.23905	0.147627	0.00120656	0.00111853
GOTERM_BP_FAT	GO:0030855~epithelial cell differentiation	44	5.57668	2.45445e-05	FOXA1, LAMA5, CSTA, RARG, LEF1, TCHH, PDGFB, STC1, APOLD1, CDH2, SIX3, DACT2, FLNB, S1PR2, SOX4, DSP, TBX1, JUN, MEF2C, ANXA1, PDE4D, PTCH1, IL13, LIF, IL31RA, KAZN, ATP2B2, MYO7A, PAX2, KLF2, TNFRSF1A, FOSL2, VEGFA, DAB2, KRT17, COL4A1, WT1, ID1, TXNIP, ID3, F2RL1, PPARG, ALDOC, CD24	655	563	16650	1.98663	0.14826	0.00120656	0.00111853
GOTERM_BP_FAT	GO:0006468~protein phosphorylation	108	13.6882	2.45446e-05	CSF2, CCL4L2, CCND3, RASSF2, RGS3, CCND2, CDH2, PIM1, MAP3K8, PDE8A, IL6R, MAP3K4, MEF2C, CD300A, RUNX3, MID1, ADCYAP1, IL23A, PARD3, MAPKAPK2, PRKCQ, TRIB1, TRIB2, ATF3, BRSK1, CHRNA3, SPTBN5, SHC2, CCL3L1, PDGFB, RASAL1, FOXO1, SOCS1, FLRT2, IRAK2, PDGFC, TRPM6, ZNF268, ST3GAL1, SLAMF1, PLK3, JUN, GADD45A, IL31RA, LIF, IGF2, HMGA2, TNFRSF10A, INHBA, ICK, CXCL10, DAB2, EHD4, ID1, CD24, FGF13, CD…	655	1852	16650	1.48237	0.148261	0.00120656	0.00111853
GOTERM_BP_FAT	GO:0031401~positive regulation of protein modification process	74	9.37896	2.55533e-05	PRR5, BMP10, CDKN1B, CSF2, KDM1A, IL26, CCL4L2, HTR2B, SPN, CCND3, RASSF2, CCND2, CDH2, MYB, PIM1, MAP3K8, CCR7, JARID2, PDE8A, IL6R, SOX4, MAP3K4, MEF2C, CD300A, IL13, AVPR2, ADRA2B, MID1, DUSP9, TNFRSF1A, ADCYAP1, PSRC1, IL23A, MAPKAPK2, XCL2, TLR9, XCL1, ZP4, HDAC4, SHC2, CHRNA3, CCL3L1, FAM129A, PDGFB, CXCR4, ADCY1, THBS1, SOCS1, IRAK2, PDGFC, S1PR2, ZNF268, SNCA, SLAMF1, TBX1, JUN, CCL22, AN…	655	1143	16650	1.64573	0.153859	0.00124677	0.00115581
GOTERM_BP_FAT	GO:0006357~regulation of transcription from RNA polymerase II promoter	107	13.5615	2.67681e-05	FOXA1, KDM1A, GFI1, WWC2, RORC, IKZF1, IKZF4, SPIB, CREB3L1, MYB, WWC3, SOX4, EOMES, HES6, MEF2C, TLE1, ZBTB32, ATP1B4, ARID5B, RUNX3, ADCYAP1, RFX8, IL23A, TXNIP, HOXB3, ZFPM1, ATF3, EPAS1, PDGFB, NEDD4L, GATA2, FOXO1, PCBP3, ZNF704, NLRP3, CGA, SLC38A3, ZNF268, PLK3, JUN, BCL11A, PTCH1, LIF, HMGA2, MICAL2, INHBA, MAFA, ESR2, FOSL2, NFATC4, CXCL10, ID1, ID3, HOXD8, RYR2, RARG, BMP10, IL26, FASLG…	655	1835	16650	1.48225	0.160553	0.00129637	0.00120179
GOTERM_BP_FAT	GO:0014070~response to organic cyclic compound	62	7.85805	2.70935e-05	GABRB3, FOXA1, GABRB2, IL22, RYR2, RARG, CDKN1B, KDM1A, RORC, ADM, RORB, PPP3CA, CASP8, MDK, KYNU, PIM1, CASP1, CA9, MEF2C, ANXA1, PDE4D, IL13, DNTT, SSTR3, ADCYAP1, MMP14, ADORA2A, ALDH1A2, TXNIP, ITGA6, PPARG, AGXT, CHRNA3, CHRNA6, LEF1, AKAP7, STC1, ADCY1, PTGS2, THBS1, FOXO1, UGT3A2, SLIT2, SNCA, ARNT2, MBD4, JUN, JUP, PTCH1, HMGA2, INHBA, ESR2, KLF2, CXCL10, SDK1, GJB2, DAB2, WT1, KLF9, ID1,…	655	906	16650	1.73955	0.162337	0.00130248	0.00120746
GOTERM_BP_FAT	GO:0006952~defense response	92	11.6603	2.75748e-05	IL22, ITK, CXCL9, NCF2, IL26, CCL4L2, GFI1, PRF1, ADM, LSP1, CXCL3, SIRPB1, SPN, CASP8, IL36B, GNLY, MDK, KYNU, STAB1, CASP1, C3AR1, CCR7, IL6R, PTGIR, MEF2C, ANXA1, IL1R1, IL1R2, KRT1, IL13, PARP9, MID1, TNFRSF1A, CLEC4A, FGR, ADCYAP1, SLFN11, AIM2, ADORA2A, IL23A, MAPKAPK2, XCL2, TLR9, XCL1, CD48, PRKCQ, PPARG, RAB7B, MGLL, CHST2, HDAC4, RNASEL, CCL3L1, CEBPE, NLRC5, CXCR4, PTGS2, HDAC9, THBS1,…	655	1518	16650	1.5406	0.164969	0.00131594	0.00121993
GOTERM_BP_FAT	GO:0009968~negative regulation of signal transduction	71	8.99873	2.98099e-05	CSF2, KDM1A, WWC2, PLEK, HTR2B, NRARP, ADM, PTPRJ, FASLG, CHRDL1, GLI3, RASSF2, CASP8, RGS3, CDH2, CREB3L1, SIX3, WWC3, TNFSF10, RBPMS2, DACT2, GRB10, DACT3, CHAC1, DUSP4, PTGIR, TLE1, CD300A, IL1R2, DUSP9, MMP14, TLR9, ITGA6, PRKCQ, PPARG, RAB7B, TRIB1, ATF3, RGS16, LEF1, NLRC5, ITPR1, RASAL1, GATA2, THBS1, CXXC4, FOXO1, SOCS1, FLRT2, GPC1, NLRP3, IL36RN, SLIT2, S1PR2, CTHRC1, SNCA, SLAMF1, PTCH…	655	1089	16650	1.65731	0.177083	0.0014123	0.00130926
GOTERM_BP_FAT	GO:0030001~metal ion transport	57	7.22433	3.15744e-05	RYR2, CXCL9, KCNK7, CDKN1B, DENND5B, SLC23A1, HTR2B, ATP2A1, SLC8A2, PPP3CA, FTH1, NCS1, CCR7, SLC12A7, SLC12A8, PDE4D, IL13, NIPA1, ATP1B4, ANK2, KCNAB1, ATP1B1, SLC9A2, ADCYAP1, ADORA2A, SCNN1A, KCNQ3, TLR9, XCL1, SGK1, AHNAK, PDGFB, ITPR1, NEDD4L, AKAP7, STC1, KCNA6, PTGS2, CACNA1I, CD19, KCNMB4, ATP6V0A4, SLC38A3, TRPM6, NTSR1, SNCA, KCNJ15, TRPV3, KLHL3, PKDREJ, ATP2B2, KCNJ18, CXCL10, GRIN3…	655	814	16650	1.78001	0.186522	0.00147012	0.00136287
GOTERM_BP_FAT	GO:0030155~regulation of cell adhesion	48	6.08365	3.1589e-05	FOXA1, PRR5, DOCK5, LAMA5, EBI3, LEF1, DTX1, NRARP, PLG, PTPRJ, NID1, THBS1, GLI3, SPN, EPB41L4B, IL1RL2, IL36B, PLAU, SIT1, MYB, DACT2, NLRP3, RAC3, CCR7, MAP3K8, PAG1, RAG1, SLAMF1, HLA-DRB5, ANXA1, ANGPT1, CD300A, IGF2, AP3B1, VEGFA, MMP14, TMIGD2, ADORA2A, IL23A, NINJ1, PLXNB2, XCL1, ITGA6, PRKCQ, SERPINI1, CD24, PHLDB2, ZP4	655	643	16650	1.89759	0.1866	0.00147012	0.00136287
GOTERM_BP_FAT	GO:1901701~cellular response to oxygen-containing compound	62	7.85805	3.1705e-05	RYR2, RARG, CSF2, KDM1A, GFI1, RORC, RORB, PRL, SLC2A4, PPP3CA, PIM1, GRB10, PDE8A, SOX4, MEF2C, ANXA1, PDE4D, SSTR3, PAX2, RHOB, COL4A1, ALDH1A2, PRKCQ, PPARG, TRIB1, RNASEL, CEBPE, PDGFB, AKAP7, STC1, ADCY1, PTGS2, HDAC9, FOXO1, REPIN1, SOCS1, IRAK2, PDGFC, UGT3A2, NLRP3, ATP6V0A4, SLIT2, SNCA, TBX1, HLA-DRB5, JUP, CCL20, PTCH1, DAB2IP, IGF2, INHBA, GNG12, KLF3, KLF2, CXCL10, WT1, KLF9, ID1, ID…	655	912	16650	1.7281	0.187217	0.00147012	0.00136287
GOTERM_BP_FAT	GO:0009887~organ morphogenesis	66	8.36502	3.30483e-05	FOXA1, RYR2, RARG, BMP10, TREH, HTR2B, ADM, FASLG, HOXC13, RORB, GLI3, FGFRL1, NPPC, CDH2, SIX3, RBPMS2, SOX4, DSP, MEF2C, TLE1, ARID5B, MYO7A, ETV5, PAX2, MMP14, MMP13, ALDH1A2, MATN1, HOXB3, ITGA6, ZFPM1, LAMA5, LEF1, STC1, GATA2, FOXO1, BCL2L11, FLRT2, RDH10, PERP, PDGFC, LRIG1, SLIT1, LRIG3, CTHRC1, TBX1, JUN, PTCH1, LIF, HMGA2, MICAL2, KLHL3, ATP2B2, INHBA, TSHR, VEGFA, VANGL1, SDK1, DAB2, W…	655	992	16650	1.69124	0.194324	0.00151401	0.00140355
GOTERM_BP_FAT	GO:0046632~alpha-beta T cell differentiation	14	1.7744	3.31147e-05	EOMES, ITK, ANXA1, SATB1, LEF1, RORC, AP3B1, LY9, GLI3, BATF, IL23A, MYB, NLRP3, ZFPM1	655	87	16650	4.09055	0.194673	0.00151401	0.00140355
GOTERM_BP_FAT	GO:0050900~leukocyte migration	33	4.18251	3.53445e-05	CXCL9, CCL3L1, CCL4L2, PDGFB, CXCR4, DBH, CXCL3, THBS1, EPS8, SPN, C3AR1, CCR7, SLIT2, IL6R, CCL22, ANXA1, ANGPT1, CCL20, IL1R1, CD300A, PDE4D, ATP1B1, L1CAM, VEGFA, SELP, CXCL10, IL23A, GCSAML, XCL2, F2RL1, XCL1, CD48, ITGA6	655	376	16650	2.231	0.206329	0.00160474	0.00148766
GOTERM_BP_FAT	GO:0043065~positive regulation of apoptotic process	44	5.57668	3.57584e-05	HDAC4, RARG, CDKN1B, BCL2A1, ADM, FASLG, PTGS2, THBS1, FOXO1, FGD4, CASP8, BCL2L11, RASSF2, CASP1, TNFSF10, NLRP3, SLIT2, ZNF268, SOX4, NTSR1, SNCA, JUN, EGLN3, SPINK2, MEF2C, ANXA1, GADD45A, GZMA, DAB2IP, OSGIN1, HMGA2, TNFRSF10A, INHBA, RHOB, NFATC4, ADORA2A, WT1, BIN1, ALDH1A2, TXNIP, ID3, ITGA6, PPARG, ATF3	655	572	16650	1.95537	0.208474	0.00161233	0.0014947
GOTERM_BP_FAT	GO:0001944~vasculature development	46	5.83016	3.72305e-05	LAMA5, EPAS1, LEF1, PDGFB, NRARP, ADM, FASLG, LRP2, GATA2, PTGS2, HDAC9, THBS1, FOXO1, APOLD1, GLI3, TYMP, CDH2, MYO18B, STAB1, C3AR1, SLIT2, SOX4, TBX1, CCBE1, NUS1, STARD13, JUN, MEF2C, ANGPT1, MCAM, KRT1, DAB2IP, LIF, HSPG2, PTPN14, RHOB, NFATC4, VEGFA, CXCL10, MMP14, TMIGD2, COL4A1, WT1, ALDH1A2, ID1, HOXB3	655	610	16650	1.91691	0.216056	0.00166721	0.00154558
GOTERM_BP_FAT	GO:0000902~cell morphogenesis	78	9.88593	3.8819e-05	FOXA1, DOCK5, TENM4, KDM1A, C15ORF62, RAPH1, GLI3, FGFRL1, EPS8, PREX2, PPP3CA, CDH4, DACT2, DACT3, RAC3, PLXNC1, EOMES, MEF2C, ANXA1, UNC13A, MYO7A, PAX2, FGR, ADORA2A, PARD3, ARMC4, MATN1, GAS2, TLR9, PRKCQ, RHOU, SGK1, ZFPM1, PHLDB2, LAMA5, BRSK1, SPTBN5, CHRNA3, LEF1, NEDD4L, ARHGAP18, STC1, ATP10A, RASAL1, ADCY1, FGD4, FGD5, STRIP2, FLRT2, GPC1, SLIT1, FLNB, SLIT2, EVI5, PLXNA4, VASP, BCL11A…	655	1240	16650	1.59899	0.224156	0.00172652	0.00160056
GOTERM_BP_FAT	GO:0012501~programmed cell death	107	13.5615	3.98243e-05	CSF2, KDM1A, PRF1, RORC, RASSF2, CCND2, CREB3L1, TNFSF10, PIM1, MAP3K8, CHAC1, TNS4, PHLDA1, IL6R, SOX4, RAG1, SPINK2, MEF2C, TLE1, ADCYAP1, BIN1, TXNIP, PRKCQ, ATF3, ITPR1, FOXO1, BCL2L11, ZMAT1, NLRP3, ZNF268, NTSR1, PLK3, JUN, GADD45A, TNFRSF9, IL31RA, OSGIN1, HMGA2, TNFRSF10A, INHBA, TNFRSF10D, NFATC4, DAB2, ID1, ID3, CD24, GABRB3, GABRB2, RYR2, RARG, BMP10, CDKN1B, HTR2B, FASLG, ADM, ATP2A1,…	655	1852	16650	1.46864	0.229239	0.00175927	0.00163091
GOTERM_BP_FAT	GO:0035710~CD4-positive, alpha-beta T cell activation	12	1.52091	4.08974e-05	ANXA1, SATB1, IL23A, LEF1, MYB, RORC, NLRP3, XCL1, PRKCQ, ZFPM1, LY9, BATF	655	65	16650	4.69289	0.234628	0.00179455	0.00166362
GOTERM_BP_FAT	GO:0010648~negative regulation of cell communication	75	9.5057	4.34293e-05	CSF2, KDM1A, WWC2, PLEK, HTR2B, NRARP, ADM, PTPRJ, FASLG, CHRDL1, GLI3, PPP3CA, RASSF2, CASP8, RGS3, CDH2, CREB3L1, SIX3, WWC3, TNFSF10, RBPMS2, DACT2, GRB10, DACT3, CHAC1, DUSP4, PTGIR, TLE1, CD300A, IL1R2, ADRA2B, DUSP9, MMP14, TLR9, ITGA6, PRKCQ, PPARG, RAB7B, TRIB1, ATF3, RGS16, LEF1, NLRC5, ITPR1, RASAL1, GATA2, PTGS2, THBS1, CXXC4, FOXO1, SOCS1, FLRT2, GPC1, NLRP3, IL36RN, SLIT2, S1PR2, CTH…	655	1182	16650	1.61293	0.247194	0.00189294	0.00175484
GOTERM_BP_FAT	GO:0043068~positive regulation of programmed cell death	44	5.57668	4.39365e-05	HDAC4, RARG, CDKN1B, BCL2A1, ADM, FASLG, PTGS2, THBS1, FOXO1, FGD4, CASP8, BCL2L11, RASSF2, CASP1, TNFSF10, NLRP3, SLIT2, ZNF268, SOX4, NTSR1, SNCA, JUN, EGLN3, SPINK2, MEF2C, ANXA1, GADD45A, GZMA, DAB2IP, OSGIN1, HMGA2, TNFRSF10A, INHBA, RHOB, NFATC4, ADORA2A, WT1, BIN1, ALDH1A2, TXNIP, ID3, ITGA6, PPARG, ATF3	655	577	16650	1.93843	0.249686	0.00190236	0.00176357
GOTERM_BP_FAT	GO:0031399~regulation of protein modification process	98	12.4208	4.48677e-05	CSF2, KDM1A, CCL4L2, GFI1, CCND3, RASSF2, RGS3, CCND2, CDH2, MYB, PIM1, MAP3K8, PDE8A, IL6R, SOX4, MAP3K4, MEF2C, CD300A, MID1, ADCYAP1, IL23A, PARD3, MAPKAPK2, TRIB1, TRIB2, ATF3, CHRNA3, SHC2, CCL3L1, PDGFB, GATA2, FBXO43, FOXO1, SOCS1, FLRT2, IRAK2, PDGFC, ZNF268, SLAMF1, JUN, GADD45A, IL31RA, LIF, IGF2, TNFRSF10A, INHBA, CXCL10, DAB2, EHD4, ID1, PLXNB2, CD24, FGF13, PRR5, BMP10, CDKN1B, IL26,…	655	1664	16650	1.49708	0.25424	0.00192217	0.00178194
GOTERM_BP_FAT	GO:0022409~positive regulation of cell-cell adhesion	25	3.16857	4.52329e-05	FOXA1, PRR5, EBI3, LEF1, GLI3, SPN, IL1RL2, IL36B, MYB, NLRP3, CCR7, MAP3K8, RAG1, SLAMF1, HLA-DRB5, ANXA1, IGF2, AP3B1, TMIGD2, IL23A, XCL1, ITGA6, PRKCQ, CD24, ZP4	655	248	16650	2.56248	0.256019	0.00192217	0.00178194
GOTERM_BP_FAT	GO:0070588~calcium ion transmembrane transport	26	3.29531	4.52761e-05	RYR2, CXCL9, AHNAK, DENND5B, HTR2B, ITPR1, ATP2A1, SLC8A2, CACNA1I, CD19, NCS1, CCR7, TRPM6, NTSR1, SNCA, PDE4D, IL13, TRPV3, ANK2, PKDREJ, ATP2B2, ATP1B1, CXCL10, GRIN3B, TLR9, XCL1	655	264	16650	2.50347	0.256229	0.00192217	0.00178194
GOTERM_BP_FAT	GO:0023057~negative regulation of signaling	75	9.5057	4.73281e-05	CSF2, KDM1A, WWC2, PLEK, HTR2B, NRARP, ADM, PTPRJ, FASLG, CHRDL1, GLI3, PPP3CA, RASSF2, CASP8, RGS3, CDH2, CREB3L1, SIX3, WWC3, TNFSF10, RBPMS2, DACT2, GRB10, DACT3, CHAC1, DUSP4, PTGIR, TLE1, CD300A, IL1R2, ADRA2B, DUSP9, MMP14, TLR9, ITGA6, PRKCQ, PPARG, RAB7B, TRIB1, ATF3, RGS16, LEF1, NLRC5, ITPR1, RASAL1, GATA2, PTGS2, THBS1, CXXC4, FOXO1, SOCS1, FLRT2, GPC1, NLRP3, IL36RN, SLIT2, S1PR2, CTH…	655	1186	16650	1.60749	0.266141	0.00199633	0.00185068
GOTERM_BP_FAT	GO:0048568~embryonic organ development	35	4.43599	4.82757e-05	RYR2, RARG, CSF2, EPAS1, LEF1, PDGFB, ADM, PCDH12, GATA2, GLI3, CASP8, RDH10, SIX3, LRIG1, RBPMS2, LRIG3, CTHRC1, EOMES, TBX1, MEF2C, PTCH1, LIF, MICAL2, ATP2B2, MYO7A, PAX2, TSHR, VEGFA, MMP14, MYO15A, ALDH1A2, ID3, SPRY2, HOXB3, ZFPM1	655	417	16650	2.13356	0.270674	0.00200417	0.00185795
GOTERM_BP_FAT	GO:0072358~cardiovascular system development	63	7.98479	4.85819e-05	RYR2, BMP10, TENM4, HTR2B, NRARP, ADM, FASLG, GLI3, FGFRL1, CDH2, MYO18B, STAB1, C3AR1, SOX4, EOMES, DSP, CCBE1, MEF2C, KRT1, ANK2, KCNAB1, HSPG2, RHOB, MMP14, TMIGD2, COL4A1, ALDH1A2, ARMC4, HOXB3, PPARG, ZFPM1, LAMA5, EPAS1, LEF1, PDGFB, LRP2, GATA2, PTGS2, HDAC9, THBS1, FOXO1, APOLD1, TYMP, FLRT2, SLIT2, TBX1, NUS1, STARD13, JUN, ANGPT1, MCAM, PTCH1, DAB2IP, LIF, MICAL2, PTPN14, NFATC4, VEGFA,…	655	945	16650	1.69466	0.272132	0.00200417	0.00185795
GOTERM_BP_FAT	GO:0072359~circulatory system development	63	7.98479	4.85819e-05	RYR2, BMP10, TENM4, HTR2B, NRARP, ADM, FASLG, GLI3, FGFRL1, CDH2, MYO18B, STAB1, C3AR1, SOX4, EOMES, DSP, CCBE1, MEF2C, KRT1, ANK2, KCNAB1, HSPG2, RHOB, MMP14, TMIGD2, COL4A1, ALDH1A2, ARMC4, HOXB3, PPARG, ZFPM1, LAMA5, EPAS1, LEF1, PDGFB, LRP2, GATA2, PTGS2, HDAC9, THBS1, FOXO1, APOLD1, TYMP, FLRT2, SLIT2, TBX1, NUS1, STARD13, JUN, ANGPT1, MCAM, PTCH1, DAB2IP, LIF, MICAL2, PTPN14, NFATC4, VEGFA,…	655	945	16650	1.69466	0.272132	0.00200417	0.00185795
GOTERM_BP_FAT	GO:0045859~regulation of protein kinase activity	52	6.59062	4.874e-05	CDKN1B, HTR2B, PTPRJ, CCND3, RASSF2, RGS3, CCND2, PIM1, MAP3K8, CCR7, IL6R, MAP3K4, DUSP4, MEF2C, CD300A, ADRA2B, DUSP9, FGR, ADCYAP1, PSRC1, ADORA2A, IL23A, MAPKAPK2, TLR9, TRIB1, TRIB2, ZP4, SHC2, CHRNA3, PDGFB, CXCR4, ADCY1, THBS1, PPM1E, SOCS1, FLRT2, IRAK2, PDGFC, SH3BP5, S1PR2, SNCA, CDKN2C, ANGPT1, GADD45A, DAB2IP, IGF2, TNFRSF10A, VEGFA, CXCL10, SPRY2, CD24, FGF13	655	730	16650	1.81073	0.272885	0.00200417	0.00185795
GOTERM_BP_FAT	GO:0071621~granulocyte chemotaxis	15	1.90114	4.92681e-05	ANXA1, CCL22, CCL3L1, CCL20, PDE4D, CCL4L2, CXCL3, THBS1, VEGFA, IL23A, C3AR1, XCL2, XCL1, CCR7, SLIT2	655	103	16650	3.70192	0.275391	0.00200698	0.00186056
GOTERM_BP_FAT	GO:0006366~transcription from RNA polymerase II promoter	105	13.308	4.94225e-05	FOXA1, KDM1A, GFI1, WWC2, RORC, IKZF1, RORB, IKZF4, CREB3L1, MYB, WWC3, PAPOLA, SOX4, EOMES, HES6, MEF2C, TLE1, ZBTB32, ATP1B4, ARID5B, RUNX3, ADCYAP1, IL23A, TXNIP, HOXB3, ZFPM1, ATF3, EPAS1, PDGFB, NEDD4L, DTX1, GATA2, FOXO1, PCBP3, NLRP3, CGA, SLC38A3, ZNF268, PLK3, JUN, BCL11A, PTCH1, LIF, HMGA2, MICAL2, INHBA, MAFA, ESR2, FOSL2, NFATC4, CXCL10, ID1, ID3, HOXD8, RYR2, RARG, BMP10, IL26, FASLG…	655	1820	16650	1.46653	0.276122	0.00200698	0.00186056
GOTERM_BP_FAT	GO:0006793~phosphorus metabolic process	162	20.5323	5.01961e-05	CSF2, DGKA, CCL4L2, NUDT11, NPPC, CCND3, RASSF2, RGS3, CCND2, CDH2, LIPG, GRB10, PIM1, MAP3K8, PDE8A, IL6R, MAP3K4, MEF2C, CD300A, ATP1B1, RUNX3, MID1, ADCYAP1, IL23A, PARD3, MAPKAPK2, PRKCQ, HRASLS5, UQCRC2, TRIB1, TRIB2, ATF3, BRSK1, CHRNA3, SPTBN5, SHC2, CCL3L1, GPR87, PDGFB, RASAL1, FOXO1, INPP5A, SOCS1, FLRT2, IRAK2, CD19, PDGFC, ATP6V0A4, TRPM6, ZNF268, ST3GAL1, NTSR1, SLAMF1, TMEM132D, FDP…	655	3089	16650	1.33312	0.279774	0.00201341	0.00186651
GOTERM_BP_FAT	GO:0006811~ion transport	88	11.1534	5.01966e-05	GABRB3, GABRB2, RYR2, CXCL9, KCNK7, CDKN1B, DENND5B, SLC23A1, HTR2B, ATP2A1, SLC2A3, SLC8A2, PPP3CA, LASP1, FTH1, NCS1, CA9, CCR7, SLC12A7, SLC12A8, SLC6A19, MEF2C, ANXA1, SLC32A1, PDE4D, TSC22D3, ABCC5, IL13, NIPA1, ANO9, ATP1B4, TMC8, ANK2, KCNAB1, ATP1B1, SLC9A2, ADCYAP1, ADORA2A, SCNN1A, KCNQ3, TLR9, XCL1, PPARG, SGK1, AGXT, SLC22A20, GRIA2, CHRNA3, AHNAK, CHRNA6, SLC22A1, PDGFB, ITPR1, NEDD4…	655	1458	16650	1.53426	0.279777	0.00201341	0.00186651
GOTERM_BP_FAT	GO:0035270~endocrine system development	17	2.15463	5.05572e-05	TBX1, ANXA1, KDM1A, HMGA2, ARID5B, GATA2, FOXO1, ADCYAP1, RFX8, MDK, WT1, ALDH1A2, SIX3, HOXB3, CGA, IL6R, SOX4	655	130	16650	3.32413	0.281472	0.0020155	0.00186846
GOTERM_BP_FAT	GO:0050863~regulation of T cell activation	28	3.5488	5.22427e-05	PRR5, EBI3, DTX1, NRARP, GLI3, SPN, IL1RL2, IL36B, SIT1, MYB, NLRP3, CCR7, MAP3K8, PAG1, RAG1, SLAMF1, HLA-DRB5, ANXA1, CD300A, IGF2, AP3B1, TMIGD2, ADORA2A, IL23A, XCL1, PRKCQ, CD24, ZP4	655	299	16650	2.38045	0.289348	0.00207008	0.00191905
GOTERM_BP_FAT	GO:0030217~T cell differentiation	22	2.78834	5.52363e-05	EOMES, ITK, ANXA1, SATB1, LEF1, RORC, DTX1, NRARP, AP3B1, LY9, GLI3, BATF, SPN, IL1RL2, IL36B, IL23A, MYB, NLRP3, CCR7, ZFPM1, SOX4, RAG1	655	204	16650	2.74136	0.303122	0.0021743	0.00201567
GOTERM_BP_FAT	GO:1902107~positive regulation of leukocyte differentiation	17	2.15463	5.55381e-05	JUN, ANXA1, ZBTB46, LEF1, LIF, AP3B1, TMEM64, GLI3, MMP14, IL1RL2, CASP8, IL36B, IL23A, MYB, NLRP3, TRIB1, RAG1	655	131	16650	3.29876	0.304496	0.0021743	0.00201567
GOTERM_BP_FAT	GO:0045785~positive regulation of cell adhesion	33	4.18251	5.60251e-05	FOXA1, PRR5, DOCK5, EBI3, LEF1, PTPRJ, NID1, GLI3, SPN, EPB41L4B, IL1RL2, IL36B, MYB, NLRP3, RAC3, CCR7, MAP3K8, RAG1, SLAMF1, HLA-DRB5, ANXA1, ANGPT1, IGF2, AP3B1, VEGFA, TMIGD2, IL23A, NINJ1, XCL1, ITGA6, PRKCQ, CD24, ZP4	655	385	16650	2.17884	0.306707	0.00218031	0.00202124
GOTERM_BP_FAT	GO:0032989~cellular component morphogenesis	81	10.2662	6.37821e-05	FOXA1, DOCK5, BMP10, TENM4, KDM1A, C15ORF62, RAPH1, GLI3, FGFRL1, EPS8, PREX2, PPP3CA, CDH4, DACT2, DACT3, RAC3, PLXNC1, EOMES, MEF2C, ANXA1, UNC13A, ANK2, MYO7A, PAX2, FGR, ADORA2A, PARD3, ARMC4, MATN1, GAS2, TLR9, PRKCQ, RHOU, SGK1, ZFPM1, PHLDB2, LAMA5, BRSK1, SPTBN5, CHRNA3, LEF1, NEDD4L, ARHGAP18, STC1, ATP10A, RASAL1, ADCY1, FGD4, FGD5, STRIP2, FLRT2, GPC1, SLIT1, FLNB, SLIT2, EVI5, PLXNA4,…	655	1321	16650	1.55867	0.340993	0.0024635	0.00228376
GOTERM_BP_FAT	GO:0022604~regulation of cell morphogenesis	43	5.44994	6.40554e-05	FOXA1, DOCK5, CHRNA3, LEF1, C15ORF62, ARHGAP18, NEDD4L, ATP10A, RASAL1, EPS8, PPP3CA, FGD4, FGD5, CDH4, STRIP2, SLIT1, DACT3, RAC3, SLIT2, PLXNC1, EVI5, PLXNA4, ANXA1, UNC13A, BCL11A, DAB2IP, LIF, L1CAM, SSH3, PAX2, NFATC4, VEGFA, FGR, DAB2, BAMBI, ID1, UST, GAS2, PLXNB2, RHOU, FGF13, PHLDB2, FERMT2	655	568	16650	1.92439	0.342169	0.0024635	0.00228376
GOTERM_BP_FAT	GO:0001655~urogenital system development	29	3.67554	6.64593e-05	FOXA1, LAMA5, RARG, CDKN1B, PDGFB, GATA2, NID1, GLI3, BCL2L11, RDH10, DACT2, SLIT2, SOX4, ARG2, MEF2C, ANXA1, ANGPT1, PTCH1, LIF, ARID5B, KLHL3, PAX2, VEGFA, COL4A1, WT1, ALDH1A2, ID3, ITGA6, CD24	655	320	16650	2.30367	0.352428	0.002541	0.00235561
GOTERM_BP_FAT	GO:0001818~negative regulation of cytokine production	23	2.91508	6.97031e-05	SRGN, HLA-DRB5, ANXA1, ANGPT1, IL1R2, TNFRSF9, LEF1, IL13, NLRC5, INHBA, THBS1, KLF2, IL23A, TLR9, F2RL1, XCL1, NLRP3, IL36RN, CD24, IL6R, TRIB2, ZFPM1, SLAMF1	655	223	16650	2.62178	0.366018	0.00264953	0.00245622
GOTERM_BP_FAT	GO:0051046~regulation of secretion	49	6.21039	7.07913e-05	RAB3B, IL26, HTR2B, PPP3CA, NCS1, CASP1, CCR7, SOX4, SRGN, MEF2C, ANXA1, UNC13A, CD300A, IL1R2, IL13, AVPR2, GAB2, ADRA2B, SYTL3, FGR, STX1B, ADCYAP1, AIM2, ADORA2A, TLR9, SGK1, CHRNA3, CHRNA6, ITPR1, STC1, RETN, C2CD4C, GATA2, CACNA1I, SOCS1, KCNMB4, NLRP3, IL36RN, NTSR1, SNCA, SLAMF1, HLA-DRB5, ANGPT1, TNFRSF9, CYP4F2, LIF, HMGA2, INHBA, F2RL1	655	683	16650	1.82368	0.370513	0.00267534	0.00248015
GOTERM_BP_FAT	GO:0007420~brain development	49	6.21039	7.29224e-05	KDM1A, SLC23A1, GLI3, AFF2, CDH2, ZIC2, MDK, SIX3, RAC3, EOMES, MEF2C, SLC32A1, AVPR2, KCNAB1, SSTR3, PAX2, ADCYAP1, COL4A1, ALDH1A2, ARMC4, HOXB3, INA, BCL2A1, LEF1, LRP2, GATA2, PCDH18, BCL2L11, SLIT1, SLIT2, SLC38A3, PLXNA4, ARNT2, PCDH9, PTCH1, DAB2IP, HMGA2, ATP2B2, INHBA, GNG12, MYO16, XAB2, EFNA2, ID1, CD9, LHX6, PLXNB2, FGF13, MDGA1	655	684	16650	1.82101	0.379223	0.00274004	0.00254013
GOTERM_BP_FAT	GO:0044092~negative regulation of molecular function	70	8.87199	7.41582e-05	CDKN1B, KDM1A, GFI1, PTPRJ, PTPRF, PPP3CA, CASP8, RGS3, PIM1, RAG1, DUSP4, SPINK2, ANXA1, CD300A, IL13, ANXA5, ANO9, TMC8, KCNAB1, DUSP9, PAX2, ADCYAP1, AIM2, ADORA2A, TLR9, TXNIP, XCL1, PPARG, TRIB1, TRIB2, ZFPM1, HDAC4, PIF1, CSTA, GPR87, LEF1, PDGFB, NLRC5, NEDD4L, FBXO43, CST7, THBS1, PPM1E, SOCS1, FLRT2, IRAK2, SH3BP5, NLRP3, SLIT2, SNCA, TMEM132D, JUN, CDKN2C, GADD45A, GZMA, PTCH1, DAB2IP, …	655	1100	16650	1.61763	0.384219	0.00277055	0.00256842
GOTERM_BP_FAT	GO:0060429~epithelium development	68	8.6185	7.48899e-05	FOXA1, RYR2, RARG, TCHH, NRARP, ADM, HOXC13, GLI3, CDH2, SIX3, DACT2, CA9, SOX4, DSP, ARG2, MEF2C, ANXA1, PDE4D, IL13, KAZN, MYO7A, PAX2, RHOB, TNFRSF1A, MMP14, COL4A1, ALDH1A2, TXNIP, PPARG, ALDOC, PHLDB2, LAMA5, CSTA, LEF1, PDGFB, STC1, APOLD1, RDH10, FLNB, SLIT2, S1PR2, CTHRC1, VASP, TBX1, STARD13, JUN, PTCH1, LIF, IL31RA, HMGA2, MICAL2, KLHL3, ATP2B2, INHBA, KLF2, NFATC4, FOSL2, VEGFA, VANGL1…	655	1060	16650	1.63071	0.387158	0.00277821	0.00257552
GOTERM_BP_FAT	GO:0042063~gliogenesis	24	3.04183	7.5213e-05	PRDM8, CDKN2C, ANXA1, TENM4, LEF1, DAB2IP, LIF, CXCR4, DTX1, HMGA2, ETV5, GLI3, PAX2, ADCYAP1, MMP14, ADORA2A, CDH2, BIN1, PARD3, GPC1, CLCF1, CD9, PPARG, SOX4	655	240	16650	2.54198	0.388452	0.00277821	0.00257552
GOTERM_BP_FAT	GO:0030225~macrophage differentiation	9	1.14068	7.62855e-05	CASP8, CEBPE, ZBTB46, IL31RA, LIF, INHBA, GATA2, TRIB1, VEGFA	655	37	16650	6.18321	0.392725	0.00280199	0.00259756
GOTERM_BP_FAT	GO:0030595~leukocyte chemotaxis	21	2.6616	8.08266e-05	CXCL9, ANXA1, CCL22, CCL3L1, CCL20, PDE4D, CCL4L2, PDGFB, CXCR4, CXCL3, THBS1, VEGFA, CXCL10, IL23A, C3AR1, XCL2, F2RL1, XCL1, CCR7, SLIT2, IL6R	655	194	16650	2.75163	0.410491	0.0029522	0.00273682
GOTERM_BP_FAT	GO:0050870~positive regulation of T cell activation	22	2.78834	8.40975e-05	PRR5, HLA-DRB5, ANXA1, EBI3, IGF2, AP3B1, GLI3, SPN, IL1RL2, TMIGD2, IL36B, IL23A, MYB, XCL1, NLRP3, MAP3K8, CCR7, PRKCQ, CD24, ZP4, SLAMF1, RAG1	655	210	16650	2.66303	0.422965	0.00305461	0.00283175
GOTERM_BP_FAT	GO:0050707~regulation of cytokine secretion	18	2.28137	8.52155e-05	SRGN, HLA-DRB5, ANXA1, ANGPT1, IL26, IL1R2, TNFRSF9, HTR2B, FGR, AIM2, SOCS1, CASP1, TLR9, F2RL1, NLRP3, CCR7, IL36RN, SLAMF1	655	150	16650	3.05038	0.427168	0.00307812	0.00285354
GOTERM_BP_FAT	GO:0001568~blood vessel development	43	5.44994	8.76608e-05	LAMA5, EPAS1, LEF1, PDGFB, NRARP, ADM, FASLG, LRP2, GATA2, PTGS2, HDAC9, THBS1, FOXO1, APOLD1, GLI3, TYMP, CDH2, MYO18B, STAB1, C3AR1, SLIT2, SOX4, TBX1, CCBE1, NUS1, STARD13, JUN, MEF2C, ANGPT1, MCAM, DAB2IP, HSPG2, RHOB, NFATC4, VEGFA, CXCL10, MMP14, TMIGD2, COL4A1, WT1, ALDH1A2, ID1, HOXB3	655	576	16650	1.89766	0.436254	0.00314905	0.0029193
GOTERM_BP_FAT	GO:0048666~neuron development	63	7.98479	8.87125e-05	GABRB3, GABRB2, TENM4, KDM1A, GFI1, RAPH1, ADM, RORB, PTPRF, GLI3, PREX2, PPP3CA, CDH4, RAC3, PLXNC1, MEF2C, UNC13A, MYO7A, RUNX3, PAX2, STX1B, ADCYAP1, ADORA2A, PARD3, TLR9, PRKCQ, SGK1, BRSK1, SPTBN5, CHRNA3, NEDD4L, RASAL1, PCDH12, ADCY1, GATA2, CAMSAP2, FLRT2, GPC1, SLIT1, SLIT2, PLXNA4, CTHRC1, VASP, JUN, BCL11A, DAB2IP, LIF, ATP2B2, L1CAM, SSH3, TSHR, NFATC4, VEGFA, CAMSAP3, SDK1, EFNA3, EF…	655	965	16650	1.65953	0.440118	0.00316941	0.00293818
GOTERM_BP_FAT	GO:0030099~myeloid cell differentiation	30	3.80228	9.12302e-05	CSF2, KDM1A, ZBTB46, CEBPE, EPAS1, GFI1, LEF1, IKZF1, GATA2, CASP8, RASSF2, CCR7, JUN, MEF2C, LIF, IL31RA, INHBA, TMEM64, GAB2, CBFA2T3, KLF2, BATF, VEGFA, EFNA2, IL23A, F2RL1, PPARG, RAB7B, TRIB1, ZFPM1	655	343	16650	2.22331	0.449259	0.00324165	0.00300514
GOTERM_BP_FAT	GO:0060562~epithelial tube morphogenesis	28	3.5488	9.3033e-05	FOXA1, LAMA5, RYR2, RARG, LEF1, NRARP, ADM, GLI3, RDH10, SLIT2, SOX4, CTHRC1, VASP, STARD13, MEF2C, PTCH1, HMGA2, MICAL2, KLHL3, PAX2, RHOB, NFATC4, VEGFA, MMP14, COL4A1, WT1, SPRY2, PLXNB2	655	309	16650	2.30342	0.455713	0.00328784	0.00304796
GOTERM_BP_FAT	GO:0042981~regulation of apoptotic process	84	10.6464	9.37875e-05	GABRB3, GABRB2, RARG, BMP10, CDKN1B, CSF2, KDM1A, HTR2B, RORC, ADM, FASLG, DBH, GLI3, RASSF2, CASP8, CCND2, MDK, CREB3L1, TNFSF10, PIM1, CASP1, CCR7, SOX4, RAG1, SPINK2, MEF2C, ANXA1, TLE1, TSC22D3, IL13, ANXA5, TMC8, PAX2, RHOB, TNFRSF1A, ADCYAP1, ADORA2A, BIN1, ALDH1A2, TXNIP, ITGA6, PRKCQ, PPARG, SGK1, ATF3, HDAC4, BCL2A1, LEF1, AMIGO2, PTGS2, THBS1, FOXO1, FGD4, BCL2L11, PERP, NLRP3, SLIT2, Z…	655	1400	16650	1.52519	0.458391	0.00329242	0.00305221
GOTERM_BP_FAT	GO:0043549~regulation of kinase activity	54	6.84411	9.41699e-05	CDKN1B, HTR2B, PTPRJ, CCND3, RASSF2, RGS3, CCND2, PIM1, MAP3K8, CCR7, IL6R, MAP3K4, DUSP4, MEF2C, CD300A, ADRA2B, DUSP9, FGR, ADCYAP1, PSRC1, ADORA2A, CCKBR, IL23A, MAPKAPK2, TLR9, TRIB1, TRIB2, ZP4, SHC2, CHRNA3, PDGFB, NLRC5, CXCR4, ADCY1, THBS1, PPM1E, SOCS1, FLRT2, IRAK2, PDGFC, SH3BP5, S1PR2, SNCA, CDKN2C, ANGPT1, GADD45A, DAB2IP, IGF2, TNFRSF10A, VEGFA, CXCL10, SPRY2, CD24, FGF13	655	788	16650	1.74197	0.459744	0.00329242	0.00305221
GOTERM_BP_FAT	GO:0006796~phosphate-containing compound metabolic process	160	20.2788	0.00010003	CSF2, DGKA, CCL4L2, NUDT11, NPPC, CCND3, RASSF2, RGS3, CCND2, CDH2, LIPG, GRB10, PIM1, MAP3K8, PDE8A, IL6R, MAP3K4, MEF2C, CD300A, ATP1B1, RUNX3, MID1, ADCYAP1, IL23A, PARD3, MAPKAPK2, PRKCQ, HRASLS5, UQCRC2, TRIB1, TRIB2, ATF3, BRSK1, CHRNA3, SPTBN5, SHC2, CCL3L1, GPR87, PDGFB, RASAL1, FOXO1, INPP5A, SOCS1, FLRT2, IRAK2, CD19, PDGFC, ATP6V0A4, TRPM6, ZNF268, ST3GAL1, NTSR1, SLAMF1, TMEM132D, FDP…	655	3083	16650	1.31923	0.480055	0.00347872	0.00322492
GOTERM_BP_FAT	GO:1903037~regulation of leukocyte cell-cell adhesion	28	3.5488	0.000113373	PRR5, EBI3, DTX1, NRARP, GLI3, SPN, IL1RL2, IL36B, SIT1, MYB, NLRP3, CCR7, MAP3K8, PAG1, RAG1, SLAMF1, HLA-DRB5, ANXA1, CD300A, IGF2, AP3B1, TMIGD2, ADORA2A, IL23A, XCL1, PRKCQ, CD24, ZP4	655	313	16650	2.27398	0.523495	0.00392187	0.00363574
GOTERM_BP_FAT	GO:0048608~reproductive structure development	34	4.30925	0.000115191	FOXA1, RARG, CDKN1B, CSF2, EPAS1, LEF1, PDGFB, STC1, ADM, RETN, PCDH12, GATA2, PTGS2, CASP8, BCL2L11, RDH10, TNFSF10, SLIT2, CGA, MAP3K4, EOMES, SPINK2, ANXA1, LIF, HMGA2, ARID5B, INHBA, VEGFA, ADCYAP1, GJB2, MMP14, WT1, COL9A3, PPARG	655	418	16650	2.06764	0.529124	0.00396378	0.00367459
GOTERM_BP_FAT	GO:0009790~embryo development	62	7.85805	0.000115911	FOXA1, RYR2, RARG, CSF2, TENM4, KDM1A, HTR2B, NRARP, ADM, AFF3, GLI3, CASP8, MYO18B, SIX3, RBPMS2, SOX4, EOMES, DUSP4, MEF2C, MYO7A, MMP8, PAX2, MMP14, ALDH1A2, HOXB3, ZFPM1, PHLDB2, LAMA5, EPAS1, LEF1, PDGFB, PCDH12, GATA2, CXXC4, BCL2L11, RDH10, PDGFC, LRIG1, LRIG3, CTHRC1, VASP, TBX1, ARNT2, ANGPT1, TXNRD1, PTCH1, LIF, HMGA2, MICAL2, ATP2B2, INHBA, TSHR, KLF2, VEGFA, XAB2, WT1, MYO15A, COL7A1,…	655	954	16650	1.65202	0.531337	0.00396768	0.0036782
GOTERM_BP_FAT	GO:0048729~tissue morphogenesis	45	5.70342	0.00011744	FOXA1, LAMA5, RYR2, RARG, BMP10, LEF1, STC1, NRARP, ADM, GLI3, RDH10, SIX3, CA9, SLIT2, SOX4, CTHRC1, EOMES, DSP, VASP, TBX1, STARD13, MEF2C, TXNRD1, PTCH1, LIF, HMGA2, MICAL2, KLHL3, INHBA, PAX2, RHOB, NFATC4, VEGFA, VANGL1, DAB2, MMP14, KRT17, COL4A1, WT1, ALDH1A2, MATN1, SPRY2, PLXNB2, ZFPM1, PHLDB2	655	622	16650	1.83906	0.535998	0.00399907	0.00370731
GOTERM_BP_FAT	GO:0002548~monocyte chemotaxis	11	1.39417	0.00012027	CXCL10, ANXA1, CCL22, CCL3L1, CCL20, CCL4L2, PDGFB, XCL2, XCL1, SLIT2, IL6R	655	61	16650	4.58391	0.544507	0.00407424	0.00377699
GOTERM_BP_FAT	GO:0007268~chemical synaptic transmission	44	5.57668	0.000123169	GABRB3, RAB3B, GABRB2, GRIA2, BRSK1, CHRNA3, CHRNA6, HTR2B, SLC1A4, DBH, RETN, C2CD4C, PTGS2, PTPRF, SLC8A2, PPP3CA, NETO1, KCNMB4, OTOF, RAC3, S1PR2, GABRD, SLC12A7, NTSR1, SNCA, MEF2C, UNC13A, SLC32A1, GAD1, PLCL2, ATP2B2, SYN2, SSTR3, ETV5, SYTL3, SHISA7, NFATC4, STX1B, ADCYAP1, PCDHB2, ADORA2A, GLRB, KCNQ3, AGRN	655	604	16650	1.85178	0.553058	0.0040877	0.00378947
GOTERM_BP_FAT	GO:0099536~synaptic signaling	44	5.57668	0.000123169	GABRB3, RAB3B, GABRB2, GRIA2, BRSK1, CHRNA3, CHRNA6, HTR2B, SLC1A4, DBH, RETN, C2CD4C, PTGS2, PTPRF, SLC8A2, PPP3CA, NETO1, KCNMB4, OTOF, RAC3, S1PR2, GABRD, SLC12A7, NTSR1, SNCA, MEF2C, UNC13A, SLC32A1, GAD1, PLCL2, ATP2B2, SYN2, SSTR3, ETV5, SYTL3, SHISA7, NFATC4, STX1B, ADCYAP1, PCDHB2, ADORA2A, GLRB, KCNQ3, AGRN	655	604	16650	1.85178	0.553058	0.0040877	0.00378947
GOTERM_BP_FAT	GO:0098916~anterograde trans-synaptic signaling	44	5.57668	0.000123169	GABRB3, RAB3B, GABRB2, GRIA2, BRSK1, CHRNA3, CHRNA6, HTR2B, SLC1A4, DBH, RETN, C2CD4C, PTGS2, PTPRF, SLC8A2, PPP3CA, NETO1, KCNMB4, OTOF, RAC3, S1PR2, GABRD, SLC12A7, NTSR1, SNCA, MEF2C, UNC13A, SLC32A1, GAD1, PLCL2, ATP2B2, SYN2, SSTR3, ETV5, SYTL3, SHISA7, NFATC4, STX1B, ADCYAP1, PCDHB2, ADORA2A, GLRB, KCNQ3, AGRN	655	604	16650	1.85178	0.553058	0.0040877	0.00378947
GOTERM_BP_FAT	GO:0099537~trans-synaptic signaling	44	5.57668	0.000123169	GABRB3, RAB3B, GABRB2, GRIA2, BRSK1, CHRNA3, CHRNA6, HTR2B, SLC1A4, DBH, RETN, C2CD4C, PTGS2, PTPRF, SLC8A2, PPP3CA, NETO1, KCNMB4, OTOF, RAC3, S1PR2, GABRD, SLC12A7, NTSR1, SNCA, MEF2C, UNC13A, SLC32A1, GAD1, PLCL2, ATP2B2, SYN2, SSTR3, ETV5, SYTL3, SHISA7, NFATC4, STX1B, ADCYAP1, PCDHB2, ADORA2A, GLRB, KCNQ3, AGRN	655	604	16650	1.85178	0.553058	0.0040877	0.00378947
GOTERM_BP_FAT	GO:0002293~alpha-beta T cell differentiation involved in immune response	10	1.26743	0.00012457	EOMES, ANXA1, IL23A, LEF1, MYB, RORC, NLRP3, ZFPM1, LY9, BATF	655	50	16650	5.08397	0.557133	0.00409264	0.00379405
GOTERM_BP_FAT	GO:0002287~alpha-beta T cell activation involved in immune response	10	1.26743	0.00012457	EOMES, ANXA1, IL23A, LEF1, MYB, RORC, NLRP3, ZFPM1, LY9, BATF	655	50	16650	5.08397	0.557133	0.00409264	0.00379405
GOTERM_BP_FAT	GO:0043067~regulation of programmed cell death	84	10.6464	0.000131309	GABRB3, GABRB2, RARG, BMP10, CDKN1B, CSF2, KDM1A, HTR2B, RORC, ADM, FASLG, DBH, GLI3, RASSF2, CASP8, CCND2, MDK, CREB3L1, TNFSF10, PIM1, CASP1, CCR7, SOX4, RAG1, SPINK2, MEF2C, ANXA1, TLE1, TSC22D3, IL13, ANXA5, TMC8, PAX2, RHOB, TNFRSF1A, ADCYAP1, ADORA2A, BIN1, ALDH1A2, TXNIP, ITGA6, PRKCQ, PPARG, SGK1, ATF3, HDAC4, BCL2A1, LEF1, AMIGO2, PTGS2, THBS1, FOXO1, FGD4, BCL2L11, PERP, NLRP3, SLIT2, Z…	655	1413	16650	1.51116	0.576227	0.00428927	0.00397634
GOTERM_BP_FAT	GO:0009612~response to mechanical stimulus	21	2.6616	0.000131867	HDAC4, RYR2, JUN, JUP, DENND5B, GADD45A, PTCH1, IL13, PKDREJ, ATP2B2, TNFRSF10A, RETN, PTGS2, THBS1, TNFRSF1A, CXCL10, MMP14, CASP8, CASP1, TXNIP, PPARG	655	201	16650	2.6558	0.577768	0.00428927	0.00397634
GOTERM_BP_FAT	GO:0022407~regulation of cell-cell adhesion	32	4.05577	0.000135801	FOXA1, PRR5, EBI3, LEF1, DTX1, NRARP, PLG, GLI3, SPN, IL1RL2, IL36B, SIT1, MYB, NLRP3, CCR7, MAP3K8, PAG1, RAG1, SLAMF1, HLA-DRB5, ANXA1, CD300A, IGF2, AP3B1, TMIGD2, ADORA2A, IL23A, XCL1, ITGA6, PRKCQ, CD24, ZP4	655	386	16650	2.10734	0.588493	0.00439461	0.00407399
GOTERM_BP_FAT	GO:0010942~positive regulation of cell death	44	5.57668	0.000136449	HDAC4, RARG, CDKN1B, BCL2A1, ADM, FASLG, PTGS2, THBS1, FOXO1, FGD4, CASP8, BCL2L11, RASSF2, CASP1, TNFSF10, NLRP3, SLIT2, ZNF268, SOX4, NTSR1, SNCA, JUN, EGLN3, SPINK2, MEF2C, ANXA1, GADD45A, GZMA, DAB2IP, OSGIN1, HMGA2, TNFRSF10A, INHBA, RHOB, NFATC4, ADORA2A, WT1, BIN1, ALDH1A2, TXNIP, ID3, ITGA6, PPARG, ATF3	655	607	16650	1.84262	0.590233	0.00439461	0.00407399
GOTERM_BP_FAT	GO:0002685~regulation of leukocyte migration	18	2.28137	0.000138581	CXCL9, ANXA1, IL1R1, CD300A, CCL20, CXCL3, THBS1, VEGFA, SELP, CXCL10, IL23A, GCSAML, C3AR1, F2RL1, XCL1, CCR7, SLIT2, IL6R	655	156	16650	2.93306	0.595905	0.0044354	0.0041118
GOTERM_BP_FAT	GO:0071902~positive regulation of protein serine/threonine kinase activity	27	3.42205	0.000139751	SHC2, CDKN1B, HTR2B, PDGFB, CXCR4, THBS1, CCND3, CCND2, IRAK2, PDGFC, PIM1, S1PR2, MAP3K4, SNCA, MEF2C, GADD45A, DAB2IP, IGF2, TNFRSF10A, ADRA2B, DUSP9, VEGFA, PSRC1, MAPKAPK2, TLR9, SPRY2, CD24	655	300	16650	2.28779	0.598985	0.0044354	0.0041118
GOTERM_BP_FAT	GO:1903522~regulation of blood circulation	27	3.42205	0.000139751	HDAC4, DOCK5, RYR2, BMP10, EPAS1, ITPR1, STC1, ADM, ATP2A1, DBH, PTGS2, SLC8A2, NPPC, KCNMB4, DSP, JUP, EPHX2, PDE4D, AVPR2, ANK2, ATP2B2, ATP1B1, ADRA2B, MYL4, ADCYAP1, F2RL1, FGF13	655	300	16650	2.28779	0.598985	0.0044354	0.0041118
GOTERM_BP_FAT	GO:1903039~positive regulation of leukocyte cell-cell adhesion	22	2.78834	0.000141677	PRR5, HLA-DRB5, ANXA1, EBI3, IGF2, AP3B1, GLI3, SPN, IL1RL2, TMIGD2, IL36B, IL23A, MYB, XCL1, NLRP3, MAP3K8, CCR7, PRKCQ, CD24, ZP4, SLAMF1, RAG1	655	218	16650	2.56531	0.604004	0.00447481	0.00414834
GOTERM_BP_FAT	GO:0061458~reproductive system development	34	4.30925	0.000145941	FOXA1, RARG, CDKN1B, CSF2, EPAS1, LEF1, PDGFB, STC1, ADM, RETN, PCDH12, GATA2, PTGS2, CASP8, BCL2L11, RDH10, TNFSF10, SLIT2, CGA, MAP3K4, EOMES, SPINK2, ANXA1, LIF, HMGA2, ARID5B, INHBA, VEGFA, ADCYAP1, GJB2, MMP14, WT1, COL9A3, PPARG	655	423	16650	2.0432	0.614893	0.00456751	0.00423427
GOTERM_BP_FAT	GO:0008219~cell death	109	13.815	0.000146009	CSF2, KDM1A, PRF1, RORC, RASSF2, CCND2, CREB3L1, TNFSF10, PIM1, MAP3K8, CHAC1, TNS4, PDE8A, PHLDA1, IL6R, SOX4, RAG1, SPINK2, MEF2C, TLE1, ADCYAP1, BIN1, TXNIP, PRKCQ, ATF3, ITPR1, FOXO1, BCL2L11, ZMAT1, NLRP3, ZNF268, NTSR1, PLK3, JUN, GADD45A, TNFRSF9, IL31RA, OSGIN1, HMGA2, TNFRSF10A, INHBA, FOSL2, TNFRSF10D, NFATC4, DAB2, ID1, ID3, CD24, GABRB3, GABRB2, RYR2, RARG, BMP10, CDKN1B, HTR2B, FASLG…	655	1958	16650	1.4151	0.615064	0.00456751	0.00423427
GOTERM_BP_FAT	GO:0060326~cell chemotaxis	24	3.04183	0.000147825	CXCL9, ANXA1, CCL22, CCL3L1, CCL20, PDE4D, CCL4L2, LEF1, PDGFB, RHOG, CXCR4, CXCL3, THBS1, VEGFA, CXCL10, IL23A, C3AR1, XCL2, F2RL1, XCL1, CCR7, PRKCQ, SLIT2, IL6R	655	251	16650	2.43058	0.619608	0.00459209	0.00425706
GOTERM_BP_FAT	GO:0002683~negative regulation of immune system process	32	4.05577	0.0001482	ZBTB46, NLRC5, DTX1, NRARP, PTPRJ, GATA2, THBS1, GLI3, SPN, SUSD4, SLIT2, PAG1, SLAMF1, HLA-DRB5, ANXA1, ANGPT1, CD300A, TSC22D3, PLCL2, DAB2IP, IL31RA, INHBA, ADCYAP1, ADORA2A, TLR9, F2RL1, XCL1, PPARG, RAB7B, TRIB1, ZFPM1, CD200	655	388	16650	2.09648	0.620539	0.00459209	0.00425706
GOTERM_BP_FAT	GO:0070555~response to interleukin-1	15	1.90114	0.000150577	HDAC4, ANXA1, CCL22, CCL3L1, IL1R1, CCL20, IL1R2, CCL4L2, DAB2IP, KLF2, IL1RL2, IRAK2, XCL2, XCL1, SNCA	655	114	16650	3.34472	0.626392	0.0046321	0.00429415
GOTERM_BP_FAT	GO:0060541~respiratory system development	21	2.6616	0.000150908	FOXA1, LAMA5, CCBE1, RARG, EPAS1, SLC23A1, LEF1, IL13, LIF, HMGA2, KCNAB1, FGFRL1, GLI3, KLF2, VEGFA, MMP14, WT1, RDH10, ALDH1A2, ID1, SPRY2	655	203	16650	2.62964	0.627199	0.0046321	0.00429415
GOTERM_BP_FAT	GO:0071345~cellular response to cytokine stimulus	49	6.21039	0.000155713	CXCL9, CCL4L2, GFI1, FASLG, SLC2A4, CXCL3, CASP8, IL36B, CCR7, IL6R, IL1R1, IL1R2, IL13, MID1, TNFRSF1A, AIM2, XCL2, XCL1, PPARG, HDAC4, RNASEL, CCL3L1, EBI3, LEF1, PDGFB, NLRC5, CXCR4, THBS1, IL1RL2, SOCS1, FLRT2, IRAK2, IL36RN, SLIT2, ZNF268, HLA-DRB5, CCL22, ANGPT1, CCL20, TNFRSF9, DAB2IP, IL31RA, IL36G, TNFRSF10A, KLF2, TNFRSF10D, CXCL10, CLCF1, F2RL1	655	706	16650	1.76427	0.638731	0.00475726	0.00441018
GOTERM_BP_FAT	GO:1903530~regulation of secretion by cell	45	5.70342	0.000157436	RAB3B, CHRNA3, IL26, CHRNA6, HTR2B, ITPR1, RETN, C2CD4C, GATA2, CACNA1I, PPP3CA, SOCS1, NCS1, CASP1, KCNMB4, NLRP3, CCR7, IL36RN, SOX4, NTSR1, SNCA, SLAMF1, SRGN, MEF2C, HLA-DRB5, ANXA1, UNC13A, ANGPT1, CD300A, TNFRSF9, IL1R2, IL13, LIF, HMGA2, INHBA, GAB2, ADRA2B, SYTL3, FGR, STX1B, ADCYAP1, AIM2, ADORA2A, TLR9, F2RL1	655	630	16650	1.8157	0.642779	0.0047755	0.00442709
GOTERM_BP_FAT	GO:0019221~cytokine-mediated signaling pathway	41	5.19645	0.000157771	RNASEL, CXCL9, CCL3L1, CCL4L2, GFI1, EBI3, NLRC5, PDGFB, CXCR4, FASLG, CXCL3, IL1RL2, CASP8, SOCS1, FLRT2, IL36B, IRAK2, CCR7, IL36RN, SLIT2, IL6R, HLA-DRB5, CCL22, ANGPT1, CCL20, IL1R1, TNFRSF9, IL1R2, IL31RA, IL36G, TNFRSF10A, MID1, TNFRSF10D, TNFRSF1A, CXCL10, AIM2, CLCF1, XCL2, F2RL1, XCL1, PPARG	655	554	16650	1.88125	0.64356	0.0047755	0.00442709
GOTERM_BP_FAT	GO:0016310~phosphorylation	121	15.3359	0.000160652	CSF2, DGKA, CCL4L2, CCND3, RASSF2, RGS3, CCND2, CDH2, GRB10, PIM1, MAP3K8, PDE8A, IL6R, MAP3K4, MEF2C, CD300A, RUNX3, MID1, ADCYAP1, IL23A, PARD3, MAPKAPK2, PRKCQ, UQCRC2, TRIB1, TRIB2, ATF3, BRSK1, CHRNA3, SPTBN5, SHC2, CCL3L1, PDGFB, RASAL1, FOXO1, SOCS1, FLRT2, IRAK2, CD19, PDGFC, TRPM6, ZNF268, ST3GAL1, SLAMF1, PLK3, JUN, GADD45A, IL31RA, LIF, IGF2, HMGA2, TNFRSF10A, INHBA, ICK, CXCL10, DAB2,…	655	2229	16650	1.3799	0.650212	0.0048403	0.00448716
GOTERM_BP_FAT	GO:0008285~negative regulation of cell proliferation	46	5.83016	0.000169023	HDAC4, RARG, CDKN1B, CCL3L1, IL26, ADM, PLG, PTPRJ, GATA2, PTGS2, THBS1, FGFRL1, GLI3, SPN, NPPC, FTH1, MXI1, JARID2, ZNF268, SOX4, JUN, PTGIR, MEF2C, HLA-DRB5, CDKN2C, CD300A, TNFRSF9, PTCH1, DAB2IP, LIF, INHBA, PTPN14, CBFA2T3, RUNX3, SSTR3, MYO16, ADCYAP1, ADORA2A, WT1, ALDH1A2, KLF9, SPRY2, CD9, XCL1, PPARG, TRIB1	655	651	16650	1.79618	0.668843	0.00506913	0.0046993
GOTERM_BP_FAT	GO:0009628~response to abiotic stimulus	65	8.23828	0.000171984	RYR2, CDKN1B, KDM1A, DENND5B, PLEKHB1, HTR2B, ADM, DBH, SLC2A4, RCSD1, NPPC, CASP8, NETO1, PLAU, CASP1, CA9, MAP3K4, ANXA1, TSC22D3, IL13, SORD, ATP1B1, CBFA2T3, RHOB, TNFRSF1A, MMP14, ADSSL1, TXNIP, PPARG, HDAC4, BRSK1, EPAS1, ITPR1, CXCR4, STC1, RETN, PTGS2, THBS1, FOXO1, APOLD1, MAP7, SLC38A3, NTSR1, ARNT2, MBD4, PLK3, JUN, EGLN3, SLC14A2, JUP, ARPP21, GADD45A, PTCH1, HMGA2, TRPV3, TNFRSF10A, …	655	1029	16650	1.60572	0.675195	0.00513224	0.0047578
GOTERM_BP_FAT	GO:0051251~positive regulation of lymphocyte activation	26	3.29531	0.000172697	PRR5, EBI3, GLI3, SPN, IL1RL2, IL36B, MYB, NLRP3, CCR7, MAP3K8, RAG1, SLAMF1, MEF2C, HLA-DRB5, ANXA1, IL13, IGF2, AP3B1, MMP14, TMIGD2, IL23A, CLCF1, XCL1, PRKCQ, CD24, ZP4	655	287	16650	2.30284	0.676705	0.00513224	0.0047578
GOTERM_BP_FAT	GO:0010557~positive regulation of macromolecule biosynthetic process	92	11.6603	0.00017421	FOXA1, RARG, BMP10, CSF2, KDM1A, IL26, RORC, HOXC13, IKZF1, RORB, GLI3, IKZF4, SPN, PPP3CA, ZIC2, MDK, CREB3L1, SIX3, MYB, CCR7, TEAD1, SOX4, MAP3K4, EOMES, MEF2C, RHOG, ATP1B4, RUNX3, ETV5, PAX2, ETV6, TNFRSF1A, ADCYAP1, ZEB2, PSRC1, IL23A, MAPKAPK2, TLR9, ITGA6, PRKCQ, PPARG, ZFPM1, ATF3, CREB5, HDAC4, RNASEL, PARM1, CEBPE, EPAS1, EBI3, LEF1, FAM129A, PDGFB, NLRC5, GATA2, THBS1, FOXO1, PDGFC, N…	655	1597	16650	1.46439	0.679887	0.00515377	0.00477776
GOTERM_BP_FAT	GO:0010243~response to organonitrogen compound	53	6.71736	0.000178818	GABRB3, GABRB2, RYR2, CDKN1B, KDM1A, ADM, DBH, PRL, SLC2A4, PPP3CA, KYNU, TNFSF10, CASP1, GRB10, MEF2C, ANXA1, PDE4D, IL13, AVPR2, DNTT, ADORA2A, COL4A1, PRKCQ, PPARG, AGXT, RNASEL, CHRNA3, CHRNA6, AKAP7, STC1, RETN, ADCY1, PTGS2, HDAC9, FOXO1, REPIN1, SOCS1, PDGFC, ATP6V0A4, SLIT2, SNCA, JUN, JUP, GSS, IGF2, GNG12, KLF3, KLF2, SDK1, GLRB, WT1, ID1, CPEB2	655	789	16650	1.70754	0.689391	0.00524938	0.0048664
GOTERM_BP_FAT	GO:0051960~regulation of nervous system development	52	6.59062	0.000179276	FOXA1, RARG, TENM4, KDM1A, GFI1, PTPRF, GLI3, PPP3CA, CDH4, CDH2, SIX3, NCS1, RAC3, PLXNC1, EOMES, MEF2C, UNC13A, ADRA2B, ETV5, PAX2, STX1B, ADCYAP1, BIN1, PARD3, HOXB3, PPARG, CHRNA3, AMIGO2, NEDD4L, CXCR4, DTX1, RASAL1, GATA2, FLRT2, SLIT1, SLIT2, PLXNA4, BCL11A, DAB2IP, LIF, HMGA2, L1CAM, SSH3, NFATC4, VEGFA, SDK1, CLCF1, ID1, UST, PLXNB2, FGF13, AGRN	655	769	16650	1.7189	0.690319	0.00524938	0.0048664
GOTERM_BP_FAT	GO:0071407~cellular response to organic cyclic compound	39	4.94297	0.00017985	GABRB3, FOXA1, GABRB2, RYR2, RARG, CDKN1B, KDM1A, LEF1, RORC, AKAP7, STC1, RORB, ADCY1, PTGS2, FOXO1, PPP3CA, CASP8, PIM1, UGT3A2, SNCA, MEF2C, ANXA1, JUP, PDE4D, PTCH1, HMGA2, INHBA, SSTR3, ESR2, KLF2, ADCYAP1, DAB2, WT1, ID1, KLF9, ID3, ITGA6, PPARG, CCDC62	655	520	16650	1.90649	0.69148	0.00524938	0.0048664
GOTERM_BP_FAT	GO:0055065~metal ion homeostasis	41	5.19645	0.000183182	RYR2, CXCL9, EPAS1, HTR2B, ITPR1, NEDD4L, CXCR4, STC1, ADM, ATP2A1, LPAR4, GATA2, SLC8A2, CD19, FTH1, C3AR1, CCR7, NTSR1, SNCA, PTGIR, EPHX2, CYP4F2, PDE4D, IL13, AVPR2, TMC8, ANK2, ATP2B2, TMEM64, ATP1B1, CYP4F12, CXCL10, ADCYAP1, ADORA2A, CCKBR, LPAR6, SCNN1A, F2RL1, XCL1, CD24, SGK1	655	558	16650	1.86777	0.698129	0.00532287	0.00493452
GOTERM_BP_FAT	GO:0051249~regulation of lymphocyte activation	33	4.18251	0.000185038	PRR5, EBI3, DTX1, NRARP, GLI3, SPN, IL1RL2, IL36B, SIT1, MYB, NLRP3, CCR7, MAP3K8, PAG1, RAG1, SLAMF1, MEF2C, HLA-DRB5, ANXA1, CD300A, IL13, IGF2, AP3B1, INHBA, MMP14, TMIGD2, ADORA2A, IL23A, CLCF1, XCL1, PRKCQ, CD24, ZP4	655	411	16650	2.04101	0.701769	0.00535299	0.00496245
GOTERM_BP_FAT	GO:0090066~regulation of anatomical structure size	37	4.68948	0.000187311	RAB3B, DOCK5, SPTBN5, MAGEL2, RARG, KDM1A, PLEK, C15ORF62, HTR2B, ARHGAP18, ADM, DBH, PTGS2, EPS8, NPPC, CDH4, KCNMB4, CCR7, SLIT2, PLXNC1, SLC12A7, PLXNA4, VASP, BCL11A, EPHX2, AVPR2, ATP2B2, L1CAM, ADRA2B, SSH3, PAX2, VEGFA, ADCYAP1, ADORA2A, SPIRE1, F2RL1, FGF13	655	484	16650	1.94325	0.706169	0.00539487	0.00500127
GOTERM_BP_FAT	GO:0032609~interferon-gamma production	14	1.7744	0.000195031	EOMES, ITK, HLA-DRB5, PDE4D, EBI3, AVPR2, INHBA, IL23A, TLR9, F2RL1, XCL1, IL36RN, ZFPM1, SLAMF1	655	103	16650	3.45512	0.720635	0.0055926	0.00518457
GOTERM_BP_FAT	GO:0044057~regulation of system process	38	4.81622	0.000199469	HDAC4, DOCK5, RYR2, BMP10, CHRNA3, TENM4, EPAS1, PDGFB, ITPR1, STC1, ADM, ATP2A1, DBH, RETN, PTGS2, SLC8A2, NPPC, PPP3CA, KCNMB4, NTSR1, DSP, JUP, EPHX2, PDE4D, AVPR2, ANK2, ATP2B2, INHBA, ATP1B1, ADRA2B, MYL4, ADCYAP1, ADORA2A, PARD3, F2RL1, FGF13, SGK1, MGLL	655	504	16650	1.91658	0.728627	0.00569489	0.0052794
GOTERM_BP_FAT	GO:0070509~calcium ion import	18	2.28137	0.000203427	RYR2, CXCL9, PDE4D, IL13, PDGFB, ITPR1, HTR2B, TRPV3, STC1, ATP2A1, ANK2, CXCL10, CACNA1I, CD19, XCL1, CCR7, NTSR1, SNCA	655	161	16650	2.84197	0.73556	0.00578264	0.00536075
GOTERM_BP_FAT	GO:0001525~angiogenesis	33	4.18251	0.000207433	LAMA5, EPAS1, LEF1, NRARP, ADM, FASLG, GATA2, PTGS2, HDAC9, THBS1, APOLD1, TYMP, STAB1, C3AR1, SLIT2, TBX1, CCBE1, NUS1, STARD13, JUN, ANGPT1, MCAM, DAB2IP, HSPG2, RHOB, NFATC4, VEGFA, CXCL10, MMP14, TMIGD2, COL4A1, ID1, HOXB3	655	413	16650	2.03113	0.742398	0.00587099	0.00544265
GOTERM_BP_FAT	GO:0070374~positive regulation of ERK1 and ERK2 cascade	19	2.40811	0.000214719	JUN, CCL22, CCL3L1, ANGPT1, IL26, CCL20, CCL4L2, PDGFB, HTR2B, VEGFA, ADCYAP1, PDGFC, XCL2, F2RL1, XCL1, SPRY2, CCR7, PDE8A, SLAMF1	655	177	16650	2.72868	0.754384	0.00605101	0.00560954
GOTERM_BP_FAT	GO:0009617~response to bacterium	40	5.06971	0.000219425	CXCL9, CSF2, CEBPE, GFI1, ADM, FASLG, CXCL3, PTGS2, SPN, CASP8, IRAK2, GNLY, STAB1, CASP1, NLRP3, CCR7, IL6R, SNCA, JUN, PTGIR, MEF2C, HLA-DRB5, CCL20, TNFRSF9, PDE4D, IL13, DAB2IP, TNFRSF10A, GNG12, TNFRSF10D, TNFRSF1A, SELP, FGR, CXCL10, IL23A, MAPKAPK2, TLR9, F2RL1, CD24, TRIB1	655	544	16650	1.86911	0.761828	0.00615709	0.00570788
GOTERM_BP_FAT	GO:0051480~regulation of cytosolic calcium ion concentration	26	3.29531	0.000225101	RYR2, CXCL9, HTR2B, ITPR1, CXCR4, ADM, LPAR4, GATA2, CD19, C3AR1, CCR7, NTSR1, SNCA, PTGIR, PDE4D, IL13, ANK2, ATP2B2, TMEM64, CXCL10, ADCYAP1, CCKBR, LPAR6, F2RL1, XCL1, CD24	655	292	16650	2.26341	0.770505	0.00628935	0.00583049
GOTERM_BP_FAT	GO:0090280~positive regulation of calcium ion import	10	1.26743	0.000229903	CXCL10, CXCL9, CD19, IL13, PDGFB, TRPV3, XCL1, STC1, NTSR1, SNCA	655	54	16650	4.70738	0.777599	0.00639618	0.00592953
GOTERM_BP_FAT	GO:0051928~positive regulation of calcium ion transport	14	1.7744	0.000236798	RYR2, CXCL9, IL13, PDGFB, TRPV3, STC1, ATP2B2, ANK2, ATP1B1, CXCL10, CD19, XCL1, NTSR1, SNCA	655	105	16650	3.38931	0.787406	0.00656012	0.0060815
GOTERM_BP_FAT	GO:1905114~cell surface receptor signaling pathway involved in cell-cell signaling	39	4.94297	0.000238739	GABRB3, RYR2, RARG, CHRNA3, LEF1, NRARP, CXXC4, FOXO1, GLI3, PPP3CA, CDH2, NETO1, SIX3, GRB10, DACT3, S1PR2, SOX4, NTSR1, CTHRC1, SNCA, MEF2C, TLE1, JUP, DAB2IP, HMGA2, TMEM64, NFATC4, VANGL1, STX1B, DAB2, ADORA2A, BAMBI, AMOTL2, NOTUM, AMOTL1, CD24, PLCB2, CDK14, FERMT2	655	527	16650	1.88117	0.790088	0.00658598	0.00610548
GOTERM_BP_FAT	GO:1903706~regulation of hemopoiesis	28	3.5488	0.000240625	RARG, KDM1A, ZBTB46, LEF1, DTX1, NRARP, GATA2, GLI3, PURB, IL1RL2, CASP8, RASSF2, IL36B, MYB, NLRP3, RAG1, JUN, MEF2C, ANXA1, LIF, AP3B1, INHBA, TMEM64, MMP14, IL23A, RAB7B, TRIB1, ZFPM1	655	328	16650	2.16999	0.79266	0.00661011	0.00612785
GOTERM_BP_FAT	GO:0070371~ERK1 and ERK2 cascade	23	2.91508	0.000242568	DUSP4, JUN, CCL22, CCL3L1, ANGPT1, IL26, CCL20, CCL4L2, DAB2IP, PDGFB, LIF, HTR2B, VEGFA, ADCYAP1, PDGFC, XCL2, F2RL1, XCL1, SPRY2, CCR7, PDE8A, ATF3, SLAMF1	655	243	16650	2.40599	0.795278	0.00663561	0.00615149
GOTERM_BP_FAT	GO:0048514~blood vessel morphogenesis	37	4.68948	0.000247967	LAMA5, EPAS1, LEF1, NRARP, ADM, FASLG, GATA2, PTGS2, HDAC9, THBS1, APOLD1, TYMP, CDH2, MYO18B, STAB1, C3AR1, SLIT2, SOX4, TBX1, CCBE1, NUS1, STARD13, JUN, ANGPT1, MCAM, DAB2IP, HSPG2, RHOB, NFATC4, VEGFA, CXCL10, MMP14, TMIGD2, COL4A1, WT1, ID1, HOXB3	655	491	16650	1.91555	0.80238	0.00675503	0.0062622
GOTERM_BP_FAT	GO:0050767~regulation of neurogenesis	47	5.95691	0.000253819	FOXA1, CHRNA3, TENM4, KDM1A, GFI1, NEDD4L, CXCR4, DTX1, RASAL1, GATA2, PTPRF, GLI3, PPP3CA, CDH4, FLRT2, CDH2, SIX3, NCS1, SLIT1, RAC3, SLIT2, PLXNC1, PLXNA4, EOMES, MEF2C, UNC13A, BCL11A, DAB2IP, LIF, HMGA2, L1CAM, ADRA2B, SSH3, ETV5, NFATC4, VEGFA, SDK1, STX1B, ADCYAP1, BIN1, CLCF1, ID1, UST, HOXB3, PLXNB2, PPARG, FGF13	655	682	16650	1.75181	0.8098	0.00688577	0.0063834
GOTERM_BP_FAT	GO:1902105~regulation of leukocyte differentiation	23	2.91508	0.000256833	JUN, ANXA1, ZBTB46, LEF1, LIF, DTX1, NRARP, AP3B1, INHBA, TMEM64, GATA2, GLI3, MMP14, IL1RL2, CASP8, RASSF2, IL36B, IL23A, MYB, NLRP3, TRIB1, ZFPM1, RAG1	655	244	16650	2.39613	0.813512	0.0069248	0.00641958
GOTERM_BP_FAT	GO:0034220~ion transmembrane transport	61	7.73131	0.000257376	GABRB3, GABRB2, RYR2, CXCL9, KCNK7, DENND5B, SLC23A1, HTR2B, ATP2A1, SLC8A2, LASP1, NCS1, CCR7, SLC12A7, MEF2C, PDE4D, TSC22D3, ABCC5, IL13, ANO9, ANK2, KCNAB1, ATP1B1, SLC9A2, SCNN1A, KCNQ3, TLR9, XCL1, SGK1, GRIA2, CHRNA3, AHNAK, CHRNA6, SLC22A1, ITPR1, NEDD4L, AKAP7, ATP10A, SLC1A4, KCNA6, THBS1, CACNA1I, CD19, KCNMB4, ATP6V0A4, APOL1, TRPM6, GABRD, NTSR1, SNCA, KCNJ15, TRPV3, PKDREJ, ATP2B2, …	655	963	16650	1.61019	0.814174	0.0069248	0.00641958
GOTERM_BP_FAT	GO:0000165~MAPK cascade	55	6.97085	0.000260694	CSF2, IL26, CCL4L2, HTR2B, PTPRJ, RASSF2, RGS3, CDH2, MAP3K8, CCR7, PDE8A, IL6R, MAP3K4, DUSP4, MEF2C, CD300A, GFRA1, ADRA2B, MID1, DUSP9, ADCYAP1, MAPKAPK2, XCL2, TLR9, XCL1, TRIB1, TRIB2, ATF3, SPTBN5, SHC2, CCL3L1, PDGFB, CXCR4, RASAL1, THBS1, FOXO1, IRAK2, PDGFC, S1PR2, SLAMF1, TBX1, JUN, CCL22, ANGPT1, CCL20, GADD45A, DAB2IP, LIF, IL31RA, IGF2, VEGFA, SPRY2, F2RL1, CD24, FGF13	655	841	16650	1.66242	0.818163	0.00698533	0.00647569
GOTERM_BP_FAT	GO:0002366~leukocyte activation involved in immune response	21	2.6616	0.000269871	EOMES, ANXA1, CD300A, LEF1, IL13, PLCL2, RORC, GAB2, GATA2, CD1C, LY9, BATF, LAT2, FGR, IL23A, CLCF1, MYB, F2RL1, NLRP3, ZFPM1, SLAMF1	655	212	16650	2.518	0.828754	0.00720169	0.00667627
GOTERM_BP_FAT	GO:0048646~anatomical structure formation involved in morphogenesis	70	8.87199	0.000276219	FOXA1, RARG, BMP10, CXCL9, TENM4, NRARP, ADM, FASLG, GLI3, STAB1, C3AR1, SOX4, EOMES, DUSP4, CCBE1, MEF2C, ANK2, MMP8, HSPG2, PAX2, RHOB, MMP14, TMIGD2, COL4A1, ARMC4, HOXB3, ITGA6, ZFPM1, PHLDB2, LAMA5, EPAS1, LEF1, GATA2, PTGS2, HDAC9, THBS1, FOXO1, APOLD1, TYMP, BCL2L11, GPC1, RDH10, PERP, SLIT2, CTHRC1, VASP, TBX1, NUS1, STARD13, JUN, ANGPT1, TXNRD1, MCAM, PTCH1, DAB2IP, HMGA2, ATP2B2, INHBA,…	655	1151	16650	1.54595	0.835718	0.00734114	0.00680554
GOTERM_BP_FAT	GO:0010001~glial cell differentiation	19	2.40811	0.00028331	PRDM8, CDKN2C, TENM4, LEF1, LIF, CXCR4, DTX1, HMGA2, GLI3, PAX2, ADORA2A, CDH2, BIN1, PARD3, GPC1, CLCF1, CD9, PPARG, SOX4	655	181	16650	2.66838	0.843162	0.00749911	0.00695199
GOTERM_BP_FAT	GO:0098660~inorganic ion transmembrane transport	49	6.21039	0.000285183	GABRB3, GABRB2, RYR2, CXCL9, KCNK7, DENND5B, SLC23A1, HTR2B, ATP2A1, SLC8A2, NCS1, CCR7, SLC12A7, PDE4D, IL13, ANO9, ANK2, KCNAB1, ATP1B1, SLC9A2, SCNN1A, KCNQ3, TLR9, XCL1, AHNAK, ITPR1, NEDD4L, AKAP7, SLC1A4, KCNA6, CACNA1I, CD19, KCNMB4, ATP6V0A4, APOL1, TRPM6, GABRD, NTSR1, SNCA, KCNJ15, TRPV3, PKDREJ, ATP2B2, KCNJ18, CXCL10, GRIN3B, SLC6A8, GLRB, PTPN3	655	725	16650	1.71803	0.845072	0.00751826	0.00696975
GOTERM_BP_FAT	GO:0048598~embryonic morphogenesis	41	5.19645	0.000296368	LAMA5, RYR2, RARG, TENM4, LEF1, HTR2B, ADM, GATA2, AFF3, GLI3, BCL2L11, RDH10, SIX3, LRIG1, RBPMS2, LRIG3, SOX4, CTHRC1, EOMES, VASP, TBX1, DUSP4, MEF2C, TXNRD1, PTCH1, HMGA2, MICAL2, ATP2B2, MYO7A, INHBA, MMP8, PAX2, TSHR, MMP14, MYO15A, COL7A1, ALDH1A2, SPRY2, HOXB3, PLXNB2, PHLDB2	655	571	16650	1.82524	0.856	0.00778082	0.00721315
GOTERM_BP_FAT	GO:0030851~granulocyte differentiation	8	1.01394	0.000297523	CSF2, KDM1A, ZBTB46, LEF1, GATA2, TRIB1, ZFPM1, CBFA2T3	655	34	16650	5.98114	0.857084	0.00778082	0.00721315
GOTERM_BP_FAT	GO:0002263~cell activation involved in immune response	21	2.6616	0.00030541	EOMES, ANXA1, CD300A, LEF1, IL13, PLCL2, RORC, GAB2, GATA2, CD1C, LY9, BATF, LAT2, FGR, IL23A, CLCF1, MYB, F2RL1, NLRP3, ZFPM1, SLAMF1	655	214	16650	2.49447	0.864268	0.00790285	0.00732627
GOTERM_BP_FAT	GO:0002292~T cell differentiation involved in immune response	10	1.26743	0.000305431	EOMES, ANXA1, IL23A, LEF1, MYB, RORC, NLRP3, ZFPM1, LY9, BATF	655	56	16650	4.53926	0.864287	0.00790285	0.00732627
GOTERM_BP_FAT	GO:1990266~neutrophil migration	13	1.64766	0.000305815	CCL22, CCL3L1, IL1R1, CCL20, PDE4D, CCL4L2, CXCL3, IL23A, C3AR1, XCL2, XCL1, CCR7, SLIT2	655	94	16650	3.51551	0.864628	0.00790285	0.00732627
GOTERM_BP_FAT	GO:0006816~calcium ion transport	30	3.80228	0.000317579	RYR2, CXCL9, AHNAK, DENND5B, HTR2B, PDGFB, ITPR1, STC1, ATP2A1, PTGS2, SLC8A2, CACNA1I, PPP3CA, CD19, NCS1, CCR7, TRPM6, NTSR1, SNCA, PDE4D, IL13, TRPV3, ANK2, PKDREJ, ATP2B2, ATP1B1, CXCL10, GRIN3B, TLR9, XCL1	655	369	16650	2.06665	0.874652	0.00817453	0.00757813
GOTERM_BP_FAT	GO:0043536~positive regulation of blood vessel endothelial cell migration	7	0.887199	0.000335211	ANGPT1, PDGFB, AMOTL1, PTGS2, THBS1, HDAC9, VEGFA	655	25	16650	7.11756	0.888304	0.00859455	0.00796751
GOTERM_BP_FAT	GO:0070372~regulation of ERK1 and ERK2 cascade	23	2.91508	0.00034085	DUSP4, JUN, CCL22, CCL3L1, ANGPT1, IL26, CCL20, CCL4L2, DAB2IP, PDGFB, LIF, HTR2B, VEGFA, ADCYAP1, PDGFC, XCL2, F2RL1, XCL1, SPRY2, CCR7, PDE8A, ATF3, SLAMF1	655	249	16650	2.34802	0.892349	0.008705	0.0080699
GOTERM_BP_FAT	GO:0002687~positive regulation of leukocyte migration	14	1.7744	0.000343655	CXCL9, IL1R1, CCL20, CXCL3, THBS1, VEGFA, SELP, CXCL10, IL23A, C3AR1, F2RL1, XCL1, CCR7, IL6R	655	109	16650	3.26493	0.894305	0.00874247	0.00810464
GOTERM_BP_FAT	GO:0070098~chemokine-mediated signaling pathway	12	1.52091	0.000349875	CXCL10, CXCL9, CCL22, CCL3L1, CCL20, CCL4L2, XCL2, XCL1, CXCR4, CCR7, SLIT2, CXCL3	655	82	16650	3.71998	0.898519	0.00886621	0.00821935
GOTERM_BP_FAT	GO:0051338~regulation of transferase activity	60	7.60456	0.000368473	CDKN1B, HTR2B, PTPRJ, CCND3, RASSF2, RGS3, CCND2, PIM1, MAP3K8, CCR7, IL6R, MAP3K4, DUSP4, MEF2C, CD300A, ADRA2B, DUSP9, FGR, PPP1R3F, ADCYAP1, PSRC1, ADORA2A, CCKBR, IL23A, MAPKAPK2, TLR9, PRKCQ, PPARG, TRIB1, TRIB2, ZP4, PIF1, SHC2, CHRNA3, PARM1, PDGFB, NLRC5, CXCR4, ADCY1, FBXO43, THBS1, PPM1E, SOCS1, FLRT2, IRAK2, PDGFC, SH3BP5, S1PR2, SNCA, CDKN2C, ANGPT1, GADD45A, DAB2IP, IGF2, TNFRSF10A, …	655	955	16650	1.59706	0.910142	0.00930145	0.00862284
GOTERM_BP_FAT	GO:0042326~negative regulation of phosphorylation	33	4.18251	0.000381932	HDAC4, CDKN1B, FAM129A, PTPRJ, PPM1E, FOXO1, SOCS1, RASSF2, RGS3, FLRT2, GRB10, SH3BP5, SLIT2, SNCA, DUSP4, JUN, CDKN2C, ANGPT1, GADD45A, CD300A, PDE4D, DAB2IP, LIF, INHBA, CBFA2T3, DUSP9, ADORA2A, PARD3, SPRY2, F2RL1, TRIB1, TRIB2, ATF3	655	428	16650	1.95994	0.917713	0.00957196	0.00887361
GOTERM_BP_FAT	GO:0071495~cellular response to endogenous stimulus	71	8.99873	0.000382117	GABRB3, FOXA1, GABRB2, RYR2, RARG, BMP10, KDM1A, RORC, RORB, PRL, SLC2A4, CHRDL1, FGFRL1, RBPMS2, GRB10, PDE8A, PTGIR, MEF2C, ANXA1, PDE4D, AVPR2, SSTR3, PAX2, ADCYAP1, COL4A1, PARD3, XCL1, PRKCQ, PPARG, HDAC4, RNASEL, LEF1, PDGFB, AKAP7, STC1, ADCY1, PTGS2, HDAC9, THBS1, FOXO1, REPIN1, SOCS1, FLRT2, GPC1, PDGFC, ATP6V0A4, SLIT2, CGA, SNCA, TBX1, JUN, JUP, GALNT3, DAB2IP, IGF2, HMGA2, INHBA, GNG1…	655	1185	16650	1.52305	0.917813	0.00957196	0.00887361
GOTERM_BP_FAT	GO:0072538~T-helper 17 type immune response	6	0.760456	0.000384346	IL23A, RORC, NLRP3, PRKCQ, LY9, BATF	655	17	16650	8.97171	0.919002	0.00959104	0.0088913
GOTERM_BP_FAT	GO:0045944~positive regulation of transcription from RNA polymerase II promoter	64	8.11153	0.000389373	FOXA1, RARG, KDM1A, IL26, HOXC13, IKZF1, GLI3, IKZF4, PPP3CA, CREB3L1, SIX3, MYB, TEAD1, SOX4, EOMES, MEF2C, ATP1B4, ETV5, PAX2, ETV6, TNFRSF1A, ADCYAP1, ZEB2, IL23A, TLR9, ITGA6, PPARG, ZFPM1, ATF3, HDAC4, RNASEL, CEBPE, EPAS1, LEF1, PDGFB, NLRC5, GATA2, FOXO1, NLRP3, CGA, SLC38A3, ZNF268, TBX1, ARNT2, JUN, BCL11A, DAB2IP, LIF, HMGA2, MICAL2, INHBA, MAFA, KLF2, NFATC4, BATF, FOSL2, VEGFA, CXCL10…	655	1041	16650	1.5628	0.921622	0.00967954	0.00897333
GOTERM_BP_FAT	GO:0050878~regulation of body fluid levels	37	4.68948	0.000391082	KDM1A, DOCK9, DGKA, PLEK, PDGFB, ITPR1, PLG, ADCY1, PRL, GATA2, THBS1, CLDN1, HK2, PLAU, PDGFC, CYP4F2, KRT1, AVPR2, FAM46A, ANXA5, RHOG, AP3B1, ATP2B2, CYP4F11, CYP4F12, ADRA2B, RHOB, F5, VEGFA, SELP, ADORA2A, SCNN1A, CD9, F2RL1, PRKCQ, ZFPM1, KLKB1	655	503	16650	1.86985	0.922493	0.0096852	0.00897858
GOTERM_BP_FAT	GO:0033002~muscle cell proliferation	17	2.15463	0.000400367	HDAC4, BMP10, PTGIR, JUN, MEF2C, CDKN1B, TENM4, ANGPT1, IL13, PDGFB, RETN, PTGS2, THBS1, RBPMS2, PPARG, TRIB1, IL6R	655	155	16650	2.78798	0.92706	0.00987774	0.00915708
GOTERM_BP_FAT	GO:0007204~positive regulation of cytosolic calcium ion concentration	24	3.04183	0.000403201	RYR2, PTGIR, CXCL9, PDE4D, IL13, ITPR1, HTR2B, CXCR4, ADM, ANK2, LPAR4, GATA2, CXCL10, ADCYAP1, CCKBR, LPAR6, CD19, C3AR1, F2RL1, XCL1, CCR7, CD24, NTSR1, SNCA	655	269	16650	2.26794	0.9284	0.00989814	0.00917599
GOTERM_BP_FAT	GO:0023014~signal transduction by protein phosphorylation	56	7.09759	0.000404222	CSF2, IL26, CCL4L2, HTR2B, PTPRJ, RASSF2, RGS3, CDH2, MAP3K8, CCR7, PDE8A, IL6R, MAP3K4, DUSP4, MEF2C, CD300A, GFRA1, ADRA2B, MID1, DUSP9, ADCYAP1, MAPKAPK2, XCL2, TLR9, XCL1, TRIB1, TRIB2, ATF3, SPTBN5, SHC2, CCL3L1, PDGFB, CXCR4, RASAL1, THBS1, FOXO1, IRAK2, PDGFC, PAK6, S1PR2, SLAMF1, TBX1, JUN, CCL22, ANGPT1, CCL20, GADD45A, DAB2IP, LIF, IL31RA, IGF2, VEGFA, SPRY2, F2RL1, CD24, FGF13	655	877	16650	1.62316	0.928877	0.00989814	0.00917599
GOTERM_BP_FAT	GO:0006874~cellular calcium ion homeostasis	31	3.92902	0.000412556	RYR2, CXCL9, HTR2B, ITPR1, CXCR4, STC1, ADM, ATP2A1, LPAR4, GATA2, SLC8A2, CD19, C3AR1, CCR7, NTSR1, SNCA, PTGIR, EPHX2, PDE4D, IL13, ANK2, ATP2B2, TMEM64, ATP1B1, CXCL10, ADCYAP1, CCKBR, LPAR6, F2RL1, XCL1, CD24	655	393	16650	2.00513	0.93265	0.0100645	0.00933023
GOTERM_BP_FAT	GO:0007599~hemostasis	29	3.67554	0.000432283	KDM1A, DOCK9, DGKA, PLEK, PDGFB, ITPR1, PLG, GATA2, THBS1, PLAU, PDGFC, CYP4F2, KRT1, AVPR2, FAM46A, ANXA5, RHOG, AP3B1, CYP4F11, ADRA2B, RHOB, F5, SELP, ADORA2A, CD9, F2RL1, PRKCQ, ZFPM1, KLKB1	655	358	16650	2.05915	0.940803	0.01047	0.00970617
GOTERM_BP_FAT	GO:0030593~neutrophil chemotaxis	12	1.52091	0.000432382	CCL22, CCL3L1, IL23A, CCL20, PDE4D, CCL4L2, XCL2, C3AR1, XCL1, CCR7, SLIT2, CXCL3	655	84	16650	3.63141	0.940841	0.01047	0.00970617
GOTERM_BP_FAT	GO:0042093~T-helper cell differentiation	9	1.14068	0.000439657	ANXA1, IL23A, LEF1, MYB, RORC, NLRP3, ZFPM1, LY9, BATF	655	47	16650	4.86763	0.94359	0.0106069	0.00983306
GOTERM_BP_FAT	GO:0048589~developmental growth	41	5.19645	0.000445425	RARG, BMP10, TENM4, KDM1A, WWC2, RAPH1, NEDD4L, STC1, ADM, RASAL1, PRL, GLI3, NPPC, CDH4, BCL2L11, RDH10, WWC3, SLIT1, SLIT2, PLXNC1, CGA, PLXNA4, MEF2C, ANXA1, UNC13A, BCL11A, PDE4D, PTCH1, HMGA2, ARID5B, L1CAM, TSHR, KLF2, VEGFA, MMP13, WT1, NINJ1, MATN1, SPRY2, FGF13, AGRN	655	583	16650	1.78767	0.945679	0.0107014	0.00992066
GOTERM_BP_FAT	GO:0051924~regulation of calcium ion transport	20	2.53485	0.000446847	RYR2, CXCL9, AHNAK, PDE4D, IL13, PDGFB, TRPV3, STC1, ATP2B2, ANK2, ATP1B1, PTGS2, CXCL10, GRIN3B, ADORA2A, CD19, TLR9, XCL1, NTSR1, SNCA	655	204	16650	2.49214	0.946182	0.0107014	0.00992066
GOTERM_BP_FAT	GO:0051093~negative regulation of developmental process	49	6.21039	0.000449742	FOXA1, RARG, CDKN1B, KDM1A, GFI1, WWC2, NRARP, FASLG, GLI3, NPPC, PPP3CA, SIX3, STAB1, WWC3, RBPMS2, DACT3, SRGN, ANXA1, TSC22D3, IL13, PAX2, STX1B, ADCYAP1, TRIB1, ZFPM1, PHLDB2, HDAC4, ZBTB46, LEF1, PDGFB, DTX1, GATA2, THBS1, SLIT1, SLIT2, CGA, STARD13, BCL11A, PTCH1, DAB2IP, HMGA2, INHBA, NFATC4, CXCL10, WT1, ID1, ID3, BCOR, FGF13	655	739	16650	1.68548	0.947191	0.0107314	0.0099485
GOTERM_BP_FAT	GO:0043367~CD4-positive, alpha-beta T cell differentiation	10	1.26743	0.00045627	ANXA1, SATB1, IL23A, LEF1, MYB, RORC, NLRP3, ZFPM1, LY9, BATF	655	59	16650	4.30845	0.949399	0.0108083	0.0100198
GOTERM_BP_FAT	GO:1904427~positive regulation of calcium ion transmembrane transport	10	1.26743	0.00045627	RYR2, CXCL10, CXCL9, CD19, IL13, XCL1, ANK2, ATP1B1, NTSR1, SNCA	655	59	16650	4.30845	0.949399	0.0108083	0.0100198
GOTERM_BP_FAT	GO:0055080~cation homeostasis	44	5.57668	0.000471954	RYR2, CXCL9, EPAS1, HTR2B, ITPR1, NEDD4L, CXCR4, STC1, ADM, FASLG, ATP2A1, LPAR4, GATA2, SLC8A2, CD19, FTH1, C3AR1, CCR7, ATP6V0A4, NTSR1, SNCA, PTGIR, EPHX2, CYP4F2, PDE4D, IL13, AVPR2, TMC8, ANK2, ATP2B2, TMEM64, ATP1B1, CYP4F12, SLC9A2, CXCL10, ADCYAP1, ADORA2A, CCKBR, LPAR6, SCNN1A, F2RL1, XCL1, CD24, SGK1	655	643	16650	1.73946	0.954332	0.0111395	0.0103268
GOTERM_BP_FAT	GO:0055085~transmembrane transport	77	9.75919	0.000478197	GABRB3, GABRB2, RYR2, CXCL9, KCNK7, DENND5B, SLC23A1, HTR2B, PRF1, ATP2A1, SLC2A3, SLC2A4, SLC8A2, LASP1, NCS1, CCR7, SLC12A7, SLC12A8, SLC6A19, MEF2C, SLC32A1, PDE4D, TSC22D3, ABCC5, IL13, NIPA1, ANO9, ANK2, KCNAB1, ATP1B1, SLC9A2, SLC7A5P2, SCNN1A, KCNQ3, TLR9, XCL1, SGK1, SLC22A20, GRIA2, RNASEL, CHRNA3, AHNAK, BCL2A1, CHRNA6, SLC22A1, ITPR1, NEDD4L, AKAP7, ATP10A, SLC1A4, KCNA6, THBS1, CACNA1…	655	1322	16650	1.48058	0.956159	0.0112462	0.0104257
GOTERM_BP_FAT	GO:0046634~regulation of alpha-beta T cell activation	11	1.39417	0.00048552	ANXA1, ADORA2A, CD300A, IL23A, EBI3, MYB, NLRP3, XCL1, AP3B1, PRKCQ, GLI3	655	72	16650	3.88359	0.95821	0.0113516	0.0105234
GOTERM_BP_FAT	GO:0048878~chemical homeostasis	64	8.11153	0.00048615	FOXA1, RYR2, CXCL9, HTR2B, ADM, FASLG, ATP2A1, DBH, SLC2A4, CLDN1, HK2, SLC8A2, PPP3CA, FTH1, LIPG, C3AR1, CCR7, LDLRAP1, SOX4, PTGIR, MEF2C, PDE4D, KRT1, IL13, AVPR2, TMC8, ANK2, ATP1B1, PAX2, SLC9A2, ADCYAP1, ADORA2A, CCKBR, SCNN1A, XCL1, PPARG, SGK1, EPAS1, ITPR1, NEDD4L, CXCR4, STC1, LPAR4, ADCY1, GATA2, FOXO1, CD19, ATP6V0A4, NTSR1, SNCA, NUS1, HLA-DRB5, EPHX2, CYP4F2, PTCH1, KLHL3, ATP2B2, …	655	1049	16650	1.55088	0.958382	0.0113516	0.0105234
GOTERM_BP_FAT	GO:0048660~regulation of smooth muscle cell proliferation	14	1.7744	0.000489073	HDAC4, PTGIR, JUN, CDKN1B, IL13, PDGFB, RETN, PTGS2, THBS1, NPPC, RBPMS2, PPARG, TRIB1, IL6R	655	113	16650	3.14936	0.95917	0.0113792	0.010549
GOTERM_BP_FAT	GO:0030900~forebrain development	29	3.67554	0.000493202	BCL2A1, KDM1A, LEF1, LRP2, GATA2, GLI3, CDH2, MDK, SIX3, SLIT1, RAC3, SLIT2, PLXNA4, EOMES, MEF2C, SLC32A1, PCDH9, AVPR2, DAB2IP, HMGA2, INHBA, GNG12, SSTR3, ADCYAP1, XAB2, EFNA2, ALDH1A2, LHX6, FGF13	655	361	16650	2.04204	0.960258	0.0114346	0.0106004
GOTERM_BP_FAT	GO:0050710~negative regulation of cytokine secretion	9	1.14068	0.000509702	SRGN, ANXA1, ANGPT1, TNFRSF9, IL1R2, NLRP3, F2RL1, IL36RN, SLAMF1	655	48	16650	4.76622	0.964324	0.0117565	0.0108987
GOTERM_BP_FAT	GO:0009187~cyclic nucleotide metabolic process	19	2.40811	0.000510681	PTGIR, CXCL9, GPR87, PDE4D, AVPR2, PDE4C, HTR2B, ADM, ATP2B2, ADCY1, THBS1, TSHR, VEGFA, CXCL10, NPPC, ADCYAP1, PDE10A, ADORA2A, PDE8A	655	190	16650	2.54198	0.964552	0.0117565	0.0108987
GOTERM_BP_FAT	GO:1903508~positive regulation of nucleic acid-templated transcription	78	9.88593	0.000533577	FOXA1, RARG, BMP10, KDM1A, IL26, RORC, HOXC13, IKZF1, RORB, GLI3, IKZF4, PPP3CA, ZIC2, MDK, CREB3L1, SIX3, MYB, TEAD1, SOX4, EOMES, MEF2C, RHOG, ATP1B4, RUNX3, ETV5, PAX2, ETV6, TNFRSF1A, ADCYAP1, ZEB2, PSRC1, IL23A, TLR9, ITGA6, PPARG, ZFPM1, ATF3, CREB5, HDAC4, RNASEL, CEBPE, EPAS1, LEF1, PDGFB, NLRC5, GATA2, FOXO1, NLRP3, CGA, SLC38A3, ZNF268, TBX1, ARNT2, JUN, BCL11A, PTCH1, DAB2IP, LIF, IL31…	655	1349	16650	1.46979	0.969483	0.0121976	0.0113077
GOTERM_BP_FAT	GO:0045893~positive regulation of transcription, DNA-templated	78	9.88593	0.000533577	FOXA1, RARG, BMP10, KDM1A, IL26, RORC, HOXC13, IKZF1, RORB, GLI3, IKZF4, PPP3CA, ZIC2, MDK, CREB3L1, SIX3, MYB, TEAD1, SOX4, EOMES, MEF2C, RHOG, ATP1B4, RUNX3, ETV5, PAX2, ETV6, TNFRSF1A, ADCYAP1, ZEB2, PSRC1, IL23A, TLR9, ITGA6, PPARG, ZFPM1, ATF3, CREB5, HDAC4, RNASEL, CEBPE, EPAS1, LEF1, PDGFB, NLRC5, GATA2, FOXO1, NLRP3, CGA, SLC38A3, ZNF268, TBX1, ARNT2, JUN, BCL11A, PTCH1, DAB2IP, LIF, IL31…	655	1349	16650	1.46979	0.969483	0.0121976	0.0113077
GOTERM_BP_FAT	GO:0003018~vascular process in circulatory system	17	2.15463	0.000569982	DOCK5, ANGPT1, EPHX2, AVPR2, HTR2B, PTPRJ, ADM, DBH, PTGS2, ADRA2B, VEGFA, NPPC, ADCYAP1, ADORA2A, F2RL1, KCNMB4, SLIT2	655	160	16650	2.70086	0.97595	0.0129037	0.0119623
GOTERM_BP_FAT	GO:0051707~response to other organism	53	6.71736	0.000570384	CXCL9, CSF2, GFI1, PRF1, ADM, FASLG, CXCL3, SPN, CASP8, GNLY, STAB1, CASP1, CCR7, IL6R, PTGIR, MEF2C, PDE4D, IL13, TNFRSF1A, FGR, SLFN11, AIM2, IL23A, MAPKAPK2, TLR9, XCL1, TRIB1, RNASEL, CEBPE, NLRC5, CXCR4, PTGS2, BCL2L11, IRAK2, NLRP3, IL36RN, SNCA, JUN, HLA-DRB5, CCL22, CCL20, TNFRSF9, DAB2IP, IL31RA, HMGA2, TNFRSF10A, GNG12, BATF, TNFRSF10D, SELP, CXCL10, F2RL1, CD24	655	829	16650	1.62515	0.976013	0.0129037	0.0119623
GOTERM_BP_FAT	GO:0043207~response to external biotic stimulus	53	6.71736	0.000570384	CXCL9, CSF2, GFI1, PRF1, ADM, FASLG, CXCL3, SPN, CASP8, GNLY, STAB1, CASP1, CCR7, IL6R, PTGIR, MEF2C, PDE4D, IL13, TNFRSF1A, FGR, SLFN11, AIM2, IL23A, MAPKAPK2, TLR9, XCL1, TRIB1, RNASEL, CEBPE, NLRC5, CXCR4, PTGS2, BCL2L11, IRAK2, NLRP3, IL36RN, SNCA, JUN, HLA-DRB5, CCL22, CCL20, TNFRSF9, DAB2IP, IL31RA, HMGA2, TNFRSF10A, GNG12, BATF, TNFRSF10D, SELP, CXCL10, F2RL1, CD24	655	829	16650	1.62515	0.976013	0.0129037	0.0119623
GOTERM_BP_FAT	GO:0010594~regulation of endothelial cell migration	14	1.7744	0.000579449	CCBE1, STARD13, BMP10, ANGPT1, DAB2IP, PDGFB, STC1, PTGS2, HDAC9, THBS1, RHOB, VEGFA, SLIT2, AMOTL1	655	115	16650	3.09459	0.977394	0.0130636	0.0121105
GOTERM_BP_FAT	GO:0071900~regulation of protein serine/threonine kinase activity	35	4.43599	0.000583044	SHC2, CDKN1B, HTR2B, PDGFB, CXCR4, PTPRJ, THBS1, CCND3, RGS3, CCND2, IRAK2, PDGFC, PIM1, MAP3K8, S1PR2, MAP3K4, SNCA, DUSP4, MEF2C, CDKN2C, GADD45A, CD300A, DAB2IP, IGF2, TNFRSF10A, ADRA2B, DUSP9, VEGFA, PSRC1, MAPKAPK2, TLR9, SPRY2, CD24, TRIB1, TRIB2	655	476	16650	1.86911	0.977919	0.0130995	0.0121437
GOTERM_BP_FAT	GO:0002294~CD4-positive, alpha-beta T cell differentiation involved in immune response	9	1.14068	0.000588515	ANXA1, IL23A, LEF1, MYB, RORC, NLRP3, ZFPM1, LY9, BATF	655	49	16650	4.66895	0.978696	0.0131771	0.0122157
GOTERM_BP_FAT	GO:0045935~positive regulation of nucleobase-containing compound metabolic process	92	11.6603	0.000594186	FOXA1, RARG, BMP10, CXCL9, CSF2, KDM1A, IL26, RORC, ADM, HOXC13, IKZF1, RORB, GLI3, IKZF4, NPPC, PPP3CA, ZIC2, MDK, CREB3L1, SIX3, MYB, TEAD1, SOX4, MAP3K4, EOMES, PTGIR, MEF2C, AVPR2, RHOG, ATP1B4, RUNX3, ETV5, PAX2, ETV6, TNFRSF1A, ADCYAP1, ZEB2, PSRC1, ADORA2A, IL23A, TLR9, ITGA6, PRKCQ, PPARG, ZFPM1, ATF3, CREB5, HDAC4, RNASEL, PARM1, CEBPE, EPAS1, LEF1, PDGFB, NLRC5, ADCY1, GATA2, FOXO1, PDG…	655	1658	16650	1.41051	0.979472	0.0131879	0.0122257
GOTERM_BP_FAT	GO:0051209~release of sequestered calcium ion into cytosol	13	1.64766	0.000595047	RYR2, CXCL9, PDE4D, IL13, ITPR1, HTR2B, ANK2, CXCL10, CD19, XCL1, CCR7, NTSR1, SNCA	655	101	16650	3.27186	0.979587	0.0131879	0.0122257
GOTERM_BP_FAT	GO:0051283~negative regulation of sequestering of calcium ion	13	1.64766	0.000595047	RYR2, CXCL9, PDE4D, IL13, ITPR1, HTR2B, ANK2, CXCL10, CD19, XCL1, CCR7, NTSR1, SNCA	655	101	16650	3.27186	0.979587	0.0131879	0.0122257
GOTERM_BP_FAT	GO:0043087~regulation of GTPase activity	46	5.83016	0.00061164	DOCK5, SPTBN5, SHC2, CSF2, CCL3L1, DENND5B, DOCK9, CCL4L2, RGS16, C15ORF62, HTR2B, PDGFB, ARHGAP18, RASAL1, ASAP2, PREX2, FGD4, FGD5, RGS3, RASGEF1C, PLEKHG4B, TAGAP, EPS8L2, CCR7, SLIT2, EVI5, STARD13, JUN, PTGIR, CCL22, ANGPT1, CCL20, ARHGEF39, DAB2IP, RHOG, ARHGAP29, GFRA1, ARHGAP25, ADCYAP1, XCL2, SPRY2, PLXNB2, XCL1, ITGA6, AGRN, CPEB2	655	691	16650	1.6922	0.981687	0.0135053	0.01252
GOTERM_BP_FAT	GO:0007167~enzyme linked receptor protein signaling pathway	59	7.47782	0.000613503	RYR2, ITK, BMP10, NCF2, PTPRJ, FASLG, PRL, CHRDL1, PTPRF, FGFRL1, EPS8, NPPC, RASSF2, RBPMS2, DACT2, GRB10, CCBE1, PTGIR, ARID5B, GFRA1, GAB2, ADRA2B, FGR, COL4A1, PARD3, MAPKAPK2, TXNIP, PRKCQ, SHC2, CHRNA3, LEF1, PDGFB, THBS1, FOXO1, SOCS1, FLRT2, GPC1, PDGFC, ATP6V0A4, PAG1, SNCA, JUN, ANGPT1, GALNT3, STYK1, DAB2IP, LIF, IL31RA, IGF2, CRIM1, INHBA, VEGFA, EFNA3, DAB2, EFNA2, BAMBI, ID1, SPRY2,…	655	954	16650	1.57209	0.981909	0.0135053	0.01252
GOTERM_BP_FAT	GO:0043269~regulation of ion transport	39	4.94297	0.000617528	RYR2, KCNK7, CHRNA3, CXCL9, AHNAK, PDGFB, NEDD4L, AKAP7, STC1, KCNA6, PTGS2, THBS1, REPIN1, CACNA1I, CD19, SLC38A3, NTSR1, SNCA, MEF2C, CYP4F2, PDE4D, IL13, KCNJ15, ANO9, TRPV3, KCNAB1, ANK2, ATP2B2, KCNJ18, ATP1B1, CXCL10, ADCYAP1, GRIN3B, ADORA2A, KCNQ3, TLR9, XCL1, SGK1, PTPN3	655	554	16650	1.78948	0.982379	0.0135133	0.0125274
GOTERM_BP_FAT	GO:0006812~cation transport	60	7.60456	0.000617999	RYR2, CXCL9, KCNK7, CDKN1B, DENND5B, SLC23A1, HTR2B, ATP2A1, SLC8A2, PPP3CA, FTH1, NCS1, CCR7, SLC12A7, SLC12A8, PDE4D, IL13, NIPA1, ATP1B4, ANK2, KCNAB1, ATP1B1, SLC9A2, ADCYAP1, ADORA2A, SCNN1A, KCNQ3, TLR9, XCL1, SGK1, CHRNA3, AHNAK, CHRNA6, SLC22A1, PDGFB, ITPR1, NEDD4L, AKAP7, STC1, KCNA6, PTGS2, CACNA1I, CD19, KCNMB4, ATP6V0A4, SLC38A3, TRPM6, NTSR1, SNCA, KCNJ15, TRPV3, KLHL3, PKDREJ, ATP2…	655	975	16650	1.5643	0.982433	0.0135133	0.0125274
GOTERM_BP_FAT	GO:0071347~cellular response to interleukin-1	12	1.52091	0.00064678	IL1RL2, CCL22, CCL3L1, IL1R1, IRAK2, CCL20, CCL4L2, IL1R2, DAB2IP, XCL2, XCL1, KLF2	655	88	16650	3.46634	0.985448	0.0140955	0.0130671
GOTERM_BP_FAT	GO:0090279~regulation of calcium ion import	13	1.64766	0.000650835	RYR2, CXCL9, PDE4D, IL13, PDGFB, TRPV3, STC1, ANK2, CXCL10, CD19, XCL1, NTSR1, SNCA	655	102	16650	3.23978	0.985829	0.0141367	0.0131054
GOTERM_BP_FAT	GO:0043393~regulation of protein binding	18	2.28137	0.000659711	HDAC4, MEF2C, KDM1A, ANGPT1, LEF1, PLCL2, DAB2IP, PDGFB, TMC8, PTPRF, NFATC4, DAB2, BAMBI, ID1, LDLRAP1, ZNF268, ZFPM1, CTHRC1	655	178	16650	2.57055	0.986628	0.0142705	0.0132293
GOTERM_BP_FAT	GO:0010941~regulation of cell death	85	10.7731	0.000662813	GABRB3, GABRB2, RARG, BMP10, CDKN1B, CSF2, KDM1A, HTR2B, RORC, ADM, FASLG, DBH, GLI3, RASSF2, CASP8, CCND2, MDK, CREB3L1, TNFSF10, PIM1, CASP1, CCR7, PDE8A, SOX4, RAG1, SPINK2, MEF2C, ANXA1, TLE1, TSC22D3, IL13, ANXA5, TMC8, PAX2, RHOB, TNFRSF1A, ADCYAP1, ADORA2A, BIN1, ALDH1A2, TXNIP, ITGA6, PRKCQ, PPARG, SGK1, ATF3, HDAC4, BCL2A1, LEF1, AMIGO2, PTGS2, THBS1, FOXO1, FGD4, BCL2L11, PERP, NLRP3, S…	655	1509	16650	1.43187	0.986897	0.0142705	0.0132293
GOTERM_BP_FAT	GO:0006968~cellular defense response	10	1.26743	0.00066354	SPN, ITK, IL1RL2, CXCL9, ADORA2A, NCF2, GNLY, CD19, PRF1, LSP1	655	62	16650	4.09998	0.986959	0.0142705	0.0132293
GOTERM_BP_FAT	GO:0070482~response to oxygen levels	26	3.29531	0.000665768	RYR2, CDKN1B, EPAS1, ITPR1, CXCR4, STC1, ADM, SLC2A4, PTGS2, THBS1, FOXO1, APOLD1, NPPC, PLAU, CASP1, CA9, PLK3, ARNT2, EGLN3, ATP1B1, CBFA2T3, VEGFA, MMP14, PPARG, CD24, CPEB2	655	314	16650	2.10483	0.987148	0.0142715	0.0132302
GOTERM_BP_FAT	GO:0055074~calcium ion homeostasis	31	3.92902	0.000674079	RYR2, CXCL9, HTR2B, ITPR1, CXCR4, STC1, ADM, ATP2A1, LPAR4, GATA2, SLC8A2, CD19, C3AR1, CCR7, NTSR1, SNCA, PTGIR, EPHX2, PDE4D, IL13, ANK2, ATP2B2, TMEM64, ATP1B1, CXCL10, ADCYAP1, CCKBR, LPAR6, F2RL1, XCL1, CD24	655	405	16650	1.94572	0.987828	0.0143168	0.0132723
GOTERM_BP_FAT	GO:0060341~regulation of cellular localization	53	6.71736	0.000678728	RAB3B, RYR2, CXCL9, KDM1A, GLI3, PPP3CA, CASP8, CDH2, DACT3, LDLRAP1, SOX4, MEF2C, UNC13A, CD300A, PDE4D, IL13, RHOG, ANK2, GAB2, FGR, STX1B, ADORA2A, IL23A, PARD3, TLR9, XCL1, RHOU, CHRNA3, NEDD4L, GATA2, PTGS2, UBE2J1, BCL2L11, CD19, MXI1, KCNMB4, NLRP3, ZNF268, NTSR1, SNCA, NUS1, PLK3, HLA-DRB5, JUP, ANGPT1, DAB2IP, LIF, PTPN14, VEGFA, REEP1, CXCL10, DAB2, BAMBI	655	834	16650	1.61541	0.988193	0.0143168	0.0132723
GOTERM_BP_FAT	GO:0048754~branching morphogenesis of an epithelial tube	16	2.02788	0.000678835	FOXA1, LAMA5, PTCH1, LEF1, HMGA2, NRARP, GLI3, PAX2, NFATC4, VEGFA, MMP14, COL4A1, WT1, RDH10, SPRY2, SLIT2	655	147	16650	2.76679	0.988201	0.0143168	0.0132723
GOTERM_BP_FAT	GO:0019722~calcium-mediated signaling	16	2.02788	0.000678835	HDAC4, RYR2, MCTP1, CCL20, PDE4D, PLEK, ITPR1, HTR2B, CXCR4, ANK2, ATP1B1, NFATC4, SELP, LAT2, PPP3CA, RCAN3	655	147	16650	2.76679	0.988201	0.0143168	0.0132723
GOTERM_BP_FAT	GO:0002274~myeloid leukocyte activation	16	2.02788	0.000678835	JUN, CSF2, CD300A, IL13, IL31RA, GAB2, GATA2, THBS1, BATF, LAT2, FGR, F2RL1, CD48, CD200, SLAMF1, SNCA	655	147	16650	2.76679	0.988201	0.0143168	0.0132723
GOTERM_BP_FAT	GO:0042089~cytokine biosynthetic process	13	1.64766	0.000710941	MAST4, CCL20, CEBPE, EBI3, INHBA, THBS1, UBE2J1, SPN, MAPKAPK2, TLR9, PRKCQ, TRIB2, ZFPM1	655	103	16650	3.20833	0.990436	0.0148801	0.0137945
GOTERM_BP_FAT	GO:0002286~T cell activation involved in immune response	12	1.52091	0.000712371	EOMES, ANXA1, IL23A, LEF1, MYB, RORC, NLRP3, F2RL1, CD1C, ZFPM1, LY9, BATF	655	89	16650	3.4274	0.990525	0.0148801	0.0137945
GOTERM_BP_FAT	GO:0050818~regulation of coagulation	12	1.52091	0.000712371	SELP, PLAU, FAM46A, ANXA5, KRT1, PLEK, PDGFB, F2RL1, PRKCQ, PLG, THBS1, KLKB1	655	89	16650	3.4274	0.990525	0.0148801	0.0137945
GOTERM_BP_FAT	GO:0034612~response to tumor necrosis factor	23	2.91508	0.000717027	HDAC4, CCL22, CCL3L1, CCL20, TNFRSF9, CCL4L2, GSS, DAB2IP, FASLG, TNFRSF10A, SLC2A4, PTGS2, AFF3, THBS1, KLF2, TNFRSF10D, TNFRSF1A, AIM2, CASP8, XCL2, F2RL1, XCL1, ZNF268	655	263	16650	2.22303	0.99081	0.0149297	0.0138404
GOTERM_BP_FAT	GO:0043066~negative regulation of apoptotic process	52	6.59062	0.000736322	GABRB3, GABRB2, RARG, CDKN1B, CSF2, KDM1A, HTR2B, RORC, FASLG, GLI3, CASP8, CCND2, MDK, CREB3L1, TNFSF10, PIM1, CCR7, RAG1, MEF2C, ANXA1, TLE1, TSC22D3, IL13, ANXA5, PAX2, ADCYAP1, ADORA2A, ITGA6, PRKCQ, BCL2A1, LEF1, AMIGO2, THBS1, FOXO1, ZNF268, NTSR1, SNCA, TBX1, ARNT2, PLK3, JUN, ANGPT1, IL31RA, HMGA2, TNFRSF10A, TNFRSF10D, VEGFA, DAB2, WT1, CLCF1, ID1, SPRY2	655	818	16650	1.61593	0.9919	0.0152828	0.0141678
GOTERM_BP_FAT	GO:0030030~cell projection organization	75	9.5057	0.00076737	KDM1A, GFI1, PLEK, C15ORF62, RAPH1, ADM, PTPRF, GLI3, PREX2, PPP3CA, CDH4, NCS1, RAC3, CCR7, PLXNC1, MEF2C, UNC13A, CCDC78, RHOG, MYO7A, PAX2, STX1B, ADCYAP1, ADORA2A, PARD3, ARMC4, TLR9, FSCN1, ITGA6, PRKCQ, SGK1, HDAC4, LAMA5, BRSK1, SPTBN5, CHRNA3, NEDD4L, RASAL1, ADCY1, CAMSAP2, FGD4, FGD5, FLRT2, GPC1, SLIT1, EPS8L2, SLIT2, S1PR2, EVI5, PLXNA4, CTHRC1, VASP, JUN, BCL11A, DAB2IP, ATP2B2, L1CA…	655	1301	16650	1.4654	0.993389	0.0158768	0.0147185
GOTERM_BP_FAT	GO:0010628~positive regulation of gene expression	93	11.7871	0.000770993	FOXA1, RARG, BMP10, CSF2, KDM1A, IL26, RORC, HOXC13, IKZF1, RORB, GLI3, IKZF4, PPP3CA, EPB41L4B, ZIC2, MDK, CREB3L1, SIX3, MYB, TEAD1, SOX4, EOMES, CCBE1, MEF2C, TLE1, AVPR2, RHOG, ATP1B4, ANK2, RUNX3, ETV5, PAX2, ETV6, TNFRSF1A, ADCYAP1, ZEB2, PSRC1, ASTL, IL23A, ALDH1A2, TLR9, ITGA6, PPARG, ZFPM1, ATF3, CREB5, HDAC4, RNASEL, CEBPE, EPAS1, LEF1, FAM129A, PDGFB, NLRC5, GATA2, THBS1, FOXO1, NLRP3,…	655	1692	16650	1.39719	0.993544	0.0159014	0.0147413
GOTERM_BP_FAT	GO:0098771~inorganic ion homeostasis	44	5.57668	0.000775271	RYR2, CXCL9, EPAS1, HTR2B, ITPR1, NEDD4L, CXCR4, STC1, ADM, FASLG, ATP2A1, LPAR4, GATA2, SLC8A2, CD19, FTH1, C3AR1, CCR7, ATP6V0A4, NTSR1, SNCA, PTGIR, EPHX2, CYP4F2, PDE4D, IL13, AVPR2, TMC8, ANK2, ATP2B2, TMEM64, ATP1B1, CYP4F12, SLC9A2, CXCL10, ADCYAP1, ADORA2A, CCKBR, LPAR6, SCNN1A, F2RL1, XCL1, CD24, SGK1	655	658	16650	1.69981	0.993722	0.0159394	0.0147765
GOTERM_BP_FAT	GO:0046425~regulation of JAK-STAT cascade	16	2.02788	0.000781638	IL22, CSF2, CD300A, IL26, IL13, LIF, IL31RA, HMGA2, PRL, TNFRSF1A, VEGFA, SOCS1, FLRT2, IL23A, CLCF1, IL6R	655	149	16650	2.72965	0.993978	0.0159698	0.0148047
GOTERM_BP_FAT	GO:1904892~regulation of STAT cascade	16	2.02788	0.000781638	IL22, CSF2, CD300A, IL26, IL13, LIF, IL31RA, HMGA2, PRL, TNFRSF1A, VEGFA, SOCS1, FLRT2, IL23A, CLCF1, IL6R	655	149	16650	2.72965	0.993978	0.0159698	0.0148047
GOTERM_BP_FAT	GO:0051347~positive regulation of transferase activity	43	5.44994	0.000795648	SHC2, CHRNA3, CDKN1B, PARM1, HTR2B, PDGFB, CXCR4, ADCY1, THBS1, CCND3, SOCS1, RASSF2, CCND2, IRAK2, PDGFC, PIM1, CCR7, MAP3K8, S1PR2, IL6R, MAP3K4, SNCA, MEF2C, ANGPT1, GADD45A, CD300A, DAB2IP, IGF2, TNFRSF10A, ADRA2B, DUSP9, VEGFA, FGR, ADCYAP1, PSRC1, IL23A, MAPKAPK2, TLR9, SPRY2, PRKCQ, CD24, FGF13, ZP4	655	640	16650	1.7079	0.994506	0.0162054	0.0150231
GOTERM_BP_FAT	GO:0021537~telencephalon development	21	2.6616	0.000803845	EOMES, MEF2C, SLC32A1, KDM1A, BCL2A1, LEF1, AVPR2, DAB2IP, INHBA, GNG12, GLI3, XAB2, EFNA2, CDH2, MDK, SIX3, SLIT1, LHX6, SLIT2, FGF13, PLXNA4	655	231	16650	2.3109	0.994792	0.0163215	0.0151308
GOTERM_BP_FAT	GO:0072001~renal system development	24	3.04183	0.000819596	LAMA5, ARG2, MEF2C, ANGPT1, PTCH1, PDGFB, LIF, ARID5B, KLHL3, NID1, GLI3, PAX2, VEGFA, BCL2L11, COL4A1, WT1, RDH10, ALDH1A2, DACT2, ID3, ITGA6, SLIT2, CD24, SOX4	655	283	16650	2.15575	0.995302	0.0165898	0.0153795
GOTERM_BP_FAT	GO:1902680~positive regulation of RNA biosynthetic process	78	9.88593	0.000829121	FOXA1, RARG, BMP10, KDM1A, IL26, RORC, HOXC13, IKZF1, RORB, GLI3, IKZF4, PPP3CA, ZIC2, MDK, CREB3L1, SIX3, MYB, TEAD1, SOX4, EOMES, MEF2C, RHOG, ATP1B4, RUNX3, ETV5, PAX2, ETV6, TNFRSF1A, ADCYAP1, ZEB2, PSRC1, IL23A, TLR9, ITGA6, PPARG, ZFPM1, ATF3, CREB5, HDAC4, RNASEL, CEBPE, EPAS1, LEF1, PDGFB, NLRC5, GATA2, FOXO1, NLRP3, CGA, SLC38A3, ZNF268, TBX1, ARNT2, JUN, BCL11A, PTCH1, DAB2IP, LIF, IL31…	655	1369	16650	1.44832	0.995586	0.0167308	0.0155102
GOTERM_BP_FAT	GO:0034330~cell junction organization	22	2.78834	0.000844508	DSP, VASP, COL17A1, LAMA5, JUP, PTPRJ, ANK2, THBS1, CLDN1, VEGFA, CAMSAP3, MMP14, CDH4, GJB2, CDH2, PARD3, PERP, FSCN1, CD9, ITGA6, PHLDB2, FERMT2	655	249	16650	2.24593	0.996009	0.0167442	0.0155226
GOTERM_BP_FAT	GO:0045936~negative regulation of phosphate metabolic process	38	4.81622	0.000845015	HDAC4, CDKN1B, GPR87, PLEK, FAM129A, PDGFB, PTPRJ, PPM1E, FOXO1, SOCS1, RASSF2, RGS3, FLRT2, GRB10, SH3BP5, SLIT2, SNCA, TMEM132D, DUSP4, JUN, CDKN2C, ANGPT1, GADD45A, CD300A, PDE4D, DAB2IP, LIF, INHBA, CBFA2T3, DUSP9, CAMSAP3, ADORA2A, PARD3, SPRY2, F2RL1, TRIB1, TRIB2, ATF3	655	544	16650	1.77565	0.996022	0.0167442	0.0155226
GOTERM_BP_FAT	GO:0010563~negative regulation of phosphorus metabolic process	38	4.81622	0.000845015	HDAC4, CDKN1B, GPR87, PLEK, FAM129A, PDGFB, PTPRJ, PPM1E, FOXO1, SOCS1, RASSF2, RGS3, FLRT2, GRB10, SH3BP5, SLIT2, SNCA, TMEM132D, DUSP4, JUN, CDKN2C, ANGPT1, GADD45A, CD300A, PDE4D, DAB2IP, LIF, INHBA, CBFA2T3, DUSP9, CAMSAP3, ADORA2A, PARD3, SPRY2, F2RL1, TRIB1, TRIB2, ATF3	655	544	16650	1.77565	0.996022	0.0167442	0.0155226
GOTERM_BP_FAT	GO:0042107~cytokine metabolic process	13	1.64766	0.000845149	MAST4, CCL20, CEBPE, EBI3, INHBA, THBS1, UBE2J1, SPN, MAPKAPK2, TLR9, PRKCQ, TRIB2, ZFPM1	655	105	16650	3.14722	0.996026	0.0167442	0.0155226
GOTERM_BP_FAT	GO:0097553~calcium ion transmembrane import into cytosol	13	1.64766	0.000845149	RYR2, CXCL9, PDE4D, IL13, ITPR1, HTR2B, ANK2, CXCL10, CD19, XCL1, CCR7, NTSR1, SNCA	655	105	16650	3.14722	0.996026	0.0167442	0.0155226
GOTERM_BP_FAT	GO:1902656~calcium ion import into cytosol	13	1.64766	0.000845149	RYR2, CXCL9, PDE4D, IL13, ITPR1, HTR2B, ANK2, CXCL10, CD19, XCL1, CCR7, NTSR1, SNCA	655	105	16650	3.14722	0.996026	0.0167442	0.0155226
GOTERM_BP_FAT	GO:0045649~regulation of macrophage differentiation	6	0.760456	0.00087321	CASP8, ZBTB46, LIF, INHBA, GATA2, TRIB1	655	20	16650	7.62595	0.996692	0.0172479	0.0159895
GOTERM_BP_FAT	GO:0051173~positive regulation of nitrogen compound metabolic process	96	12.1673	0.000896773	FOXA1, RARG, BMP10, CXCL9, CSF2, KDM1A, IL26, RORC, ADM, HOXC13, IKZF1, RORB, GLI3, IKZF4, NPPC, PPP3CA, ZIC2, MDK, CREB3L1, SIX3, MYB, TEAD1, SOX4, MAP3K4, EOMES, PTGIR, MEF2C, AVPR2, RHOG, ATP1B4, RUNX3, ETV5, PAX2, ETV6, TNFRSF1A, ADCYAP1, ZEB2, PSRC1, ADORA2A, IL23A, TLR9, ITGA6, PRKCQ, PPARG, ZFPM1, ATF3, CREB5, HDAC4, RNASEL, PARM1, CEBPE, EPAS1, LEF1, FAM129A, PDGFB, NLRC5, ADCY1, GATA2, P…	655	1767	16650	1.38104	0.997165	0.01766	0.0163715
GOTERM_BP_FAT	GO:0003417~growth plate cartilage development	5	0.633714	0.000907138	NPPC, RARG, MMP13, MATN1, STC1	655	12	16650	10.5916	0.997351	0.0177571	0.0164616
GOTERM_BP_FAT	GO:0043116~negative regulation of vascular permeability	5	0.633714	0.000907138	ADORA2A, ANGPT1, PTPRJ, ADM, SLIT2	655	12	16650	10.5916	0.997351	0.0177571	0.0164616
GOTERM_BP_FAT	GO:0010769~regulation of cell morphogenesis involved in differentiation	27	3.42205	0.000912615	FOXA1, DOCK5, CHRNA3, LEF1, PPP3CA, CDH4, SLIT1, DACT3, RAC3, SLIT2, PLXNC1, PLXNA4, BCL11A, DAB2IP, LIF, L1CAM, SSH3, PAX2, NFATC4, VEGFA, DAB2, BAMBI, ID1, UST, PLXNB2, FGF13, PHLDB2	655	339	16650	2.02459	0.997444	0.017811	0.0165115
GOTERM_BP_FAT	GO:0072503~cellular divalent inorganic cation homeostasis	31	3.92902	0.000934247	RYR2, CXCL9, HTR2B, ITPR1, CXCR4, STC1, ADM, ATP2A1, LPAR4, GATA2, SLC8A2, CD19, C3AR1, CCR7, NTSR1, SNCA, PTGIR, EPHX2, PDE4D, IL13, ANK2, ATP2B2, TMEM64, ATP1B1, CXCL10, ADCYAP1, CCKBR, LPAR6, F2RL1, XCL1, CD24	655	413	16650	1.90803	0.997782	0.0181789	0.0168526
GOTERM_BP_FAT	GO:0001666~response to hypoxia	24	3.04183	0.000937693	PLK3, RYR2, ARNT2, EGLN3, CDKN1B, EPAS1, ITPR1, CXCR4, STC1, ADM, SLC2A4, ATP1B1, PTGS2, THBS1, CBFA2T3, APOLD1, VEGFA, NPPC, MMP14, PLAU, CASP1, CA9, CD24, CPEB2	655	286	16650	2.13313	0.997831	0.0181918	0.0168646
GOTERM_BP_FAT	GO:0050817~coagulation	28	3.5488	0.000941499	KDM1A, DOCK9, DGKA, PLEK, PDGFB, ITPR1, PLG, GATA2, THBS1, PLAU, PDGFC, CYP4F2, KRT1, FAM46A, ANXA5, RHOG, AP3B1, CYP4F11, ADRA2B, RHOB, F5, SELP, ADORA2A, CD9, F2RL1, PRKCQ, ZFPM1, KLKB1	655	358	16650	1.98814	0.997884	0.0182116	0.0168829
GOTERM_BP_FAT	GO:0010959~regulation of metal ion transport	26	3.29531	0.000945819	RYR2, CXCL9, AHNAK, PDGFB, NEDD4L, AKAP7, STC1, PTGS2, CD19, NTSR1, SNCA, PDE4D, IL13, TRPV3, KCNAB1, ANK2, ATP2B2, ATP1B1, CXCL10, ADCYAP1, GRIN3B, ADORA2A, TLR9, XCL1, SGK1, PTPN3	655	322	16650	2.05253	0.997943	0.0182412	0.0169103
GOTERM_BP_FAT	GO:0030224~monocyte differentiation	7	0.887199	0.00095093	MEF2C, JUN, CSF2, ZBTB46, IL31RA, PPARG, VEGFA	655	30	16650	5.9313	0.998011	0.0182858	0.0169517
GOTERM_BP_FAT	GO:0072507~divalent inorganic cation homeostasis	32	4.05577	0.000966151	RYR2, CXCL9, HTR2B, ITPR1, CXCR4, STC1, ADM, ATP2A1, LPAR4, GATA2, SLC8A2, CD19, C3AR1, CCR7, NTSR1, SNCA, PTGIR, EPHX2, PDE4D, IL13, TMC8, ANK2, ATP2B2, TMEM64, ATP1B1, CXCL10, ADCYAP1, CCKBR, LPAR6, F2RL1, XCL1, CD24	655	433	16650	1.8786	0.9982	0.018524	0.0171726
GOTERM_BP_FAT	GO:0043069~negative regulation of programmed cell death	52	6.59062	0.00098847	GABRB3, GABRB2, RARG, CDKN1B, CSF2, KDM1A, HTR2B, RORC, FASLG, GLI3, CASP8, CCND2, MDK, CREB3L1, TNFSF10, PIM1, CCR7, RAG1, MEF2C, ANXA1, TLE1, TSC22D3, IL13, ANXA5, PAX2, ADCYAP1, ADORA2A, ITGA6, PRKCQ, BCL2A1, LEF1, AMIGO2, THBS1, FOXO1, ZNF268, NTSR1, SNCA, TBX1, ARNT2, PLK3, JUN, ANGPT1, IL31RA, HMGA2, TNFRSF10A, TNFRSF10D, VEGFA, DAB2, WT1, CLCF1, ID1, SPRY2	655	829	16650	1.59449	0.998444	0.0188965	0.0175179
GOTERM_BP_FAT	GO:0040007~growth	57	7.22433	0.000994691	RARG, BMP10, CDKN1B, TENM4, KDM1A, WWC2, RAPH1, ADM, PTPRJ, PRL, GLI3, NPPC, CDH4, WWC3, DACT3, PLXNC1, MEF2C, ANXA1, UNC13A, PDE4D, ARID5B, TMC8, MMP14, MMP13, PSRC1, NINJ1, MATN1, PRKCQ, PPARG, SGK1, LEF1, NEDD4L, STC1, RASAL1, BCL2L11, RDH10, SLIT1, SLIT2, CGA, PLXNA4, CDKN2C, BCL11A, PTCH1, CRIM1, OSGIN1, HMGA2, INHBA, L1CAM, ESR2, TSHR, KLF2, VEGFA, KRT17, WT1, SPRY2, FGF13, AGRN	655	932	16650	1.55465	0.998506	0.01896	0.0175767
GOTERM_BP_FAT	GO:0043433~negative regulation of sequence-specific DNA binding transcription factor activity	15	1.90114	0.000998362	HDAC4, KDM1A, GFI1, PTCH1, DAB2IP, NLRC5, AIM2, IRAK2, ID1, PIM1, TLR9, XCL1, ID3, NLRP3, TRIB1	655	137	16650	2.78319	0.998542	0.0189747	0.0175903
GOTERM_BP_FAT	GO:0046635~positive regulation of alpha-beta T cell activation	9	1.14068	0.00100784	ANXA1, IL23A, EBI3, MYB, NLRP3, XCL1, AP3B1, PRKCQ, GLI3	655	53	16650	4.31658	0.998629	0.0190801	0.017688
GOTERM_BP_FAT	GO:0007169~transmembrane receptor protein tyrosine kinase signaling pathway	43	5.44994	0.00100975	ITK, SHC2, CHRNA3, NCF2, PDGFB, PTPRJ, FASLG, PRL, THBS1, FOXO1, FGFRL1, EPS8, SOCS1, RASSF2, FLRT2, GPC1, PDGFC, GRB10, ATP6V0A4, PAG1, SNCA, CCBE1, PTGIR, ANGPT1, GALNT3, STYK1, DAB2IP, IL31RA, IGF2, CRIM1, ARID5B, GFRA1, GAB2, ADRA2B, VEGFA, FGR, EFNA3, EFNA2, COL4A1, MAPKAPK2, TXNIP, SPRY2, PRKCQ	655	648	16650	1.68681	0.998646	0.0190801	0.017688
GOTERM_BP_FAT	GO:0042391~regulation of membrane potential	28	3.5488	0.00102246	GABRB3, RYR2, KCNK7, CHRNA3, CHRNA6, NEDD4L, AKAP7, CACNA1I, PPP3CA, NETO1, CASP1, KCNMB4, S1PR2, NTSR1, SNCA, DSP, JUN, MEF2C, JUP, ANK2, ATP1B1, STX1B, ADCYAP1, ADORA2A, GLRB, KCNQ3, FGF13, PTPN3	655	360	16650	1.9771	0.998755	0.0192647	0.0178592
GOTERM_BP_FAT	GO:0045055~regulated exocytosis	24	3.04183	0.00103099	SRGN, UNC13A, CD300A, IL13, PLEK, PDGFB, IGF2, PLG, C2CD4C, GAB2, GATA2, THBS1, SYTL3, F5, VEGFA, SELP, LAT2, FGR, CACNA1I, STX1B, CD9, OTOF, F2RL1, ZP4	655	288	16650	2.11832	0.998822	0.0192745	0.0178682
GOTERM_BP_FAT	GO:0007596~blood coagulation	27	3.42205	0.00103155	KDM1A, DOCK9, DGKA, PLEK, PDGFB, ITPR1, PLG, GATA2, THBS1, PLAU, PDGFC, CYP4F2, KRT1, ANXA5, RHOG, AP3B1, CYP4F11, ADRA2B, RHOB, F5, SELP, ADORA2A, CD9, F2RL1, PRKCQ, ZFPM1, KLKB1	655	342	16650	2.00683	0.998826	0.0192745	0.0178682
GOTERM_BP_FAT	GO:0010632~regulation of epithelial cell migration	17	2.15463	0.00103182	DOCK5, CCBE1, STARD13, BMP10, JUN, ANGPT1, DAB2IP, PDGFB, STC1, PTGS2, HDAC9, THBS1, RHOB, VEGFA, EPB41L4B, SLIT2, AMOTL1	655	169	16650	2.55703	0.998829	0.0192745	0.0178682
GOTERM_BP_FAT	GO:0099565~chemical synaptic transmission, postsynaptic	10	1.26743	0.00105346	GABRB3, STX1B, PPP3CA, MEF2C, CHRNA3, ADORA2A, NETO1, S1PR2, NTSR1, SNCA	655	66	16650	3.85149	0.998983	0.0196226	0.0181909
GOTERM_BP_FAT	GO:0009607~response to biotic stimulus	54	6.84411	0.00106103	CXCL9, CSF2, GFI1, PRF1, ADM, FASLG, CXCL3, SPN, CASP8, GNLY, STAB1, CASP1, CCR7, IL6R, PTGIR, MEF2C, PDE4D, IL13, TNFRSF1A, FGR, SLFN11, AIM2, IL23A, MAPKAPK2, TLR9, TXNIP, XCL1, TRIB1, RNASEL, CEBPE, NLRC5, CXCR4, PTGS2, BCL2L11, IRAK2, NLRP3, IL36RN, SNCA, JUN, HLA-DRB5, CCL22, CCL20, TNFRSF9, DAB2IP, IL31RA, HMGA2, TNFRSF10A, GNG12, BATF, TNFRSF10D, SELP, CXCL10, F2RL1, CD24	655	873	16650	1.57236	0.999032	0.0197075	0.0182697
GOTERM_BP_FAT	GO:0051238~sequestering of metal ion	14	1.7744	0.00109479	RYR2, CXCL9, PDE4D, IL13, ITPR1, HTR2B, ANK2, CXCL10, CD19, FTH1, XCL1, CCR7, NTSR1, SNCA	655	123	16650	2.89332	0.999224	0.020277	0.0187976
GOTERM_BP_FAT	GO:0070838~divalent metal ion transport	31	3.92902	0.00111216	RYR2, CXCL9, AHNAK, DENND5B, HTR2B, PDGFB, ITPR1, STC1, ATP2A1, PTGS2, SLC8A2, CACNA1I, PPP3CA, CD19, NCS1, CCR7, TRPM6, NTSR1, SNCA, PDE4D, IL13, NIPA1, TRPV3, ANK2, PKDREJ, ATP2B2, ATP1B1, CXCL10, GRIN3B, TLR9, XCL1	655	418	16650	1.8852	0.999308	0.0205403	0.0190417
GOTERM_BP_FAT	GO:1901698~response to nitrogen compound	55	6.97085	0.00113196	GABRB3, GABRB2, RYR2, CDKN1B, KDM1A, ADM, DBH, PRL, SLC2A4, PPP3CA, KYNU, TNFSF10, CASP1, GRB10, CCR7, MEF2C, ANXA1, PDE4D, IL13, AVPR2, DNTT, ADORA2A, COL4A1, PRKCQ, PPARG, AGXT, RNASEL, CHRNA3, CHRNA6, AKAP7, STC1, RETN, ADCY1, PTGS2, HDAC9, FOXO1, REPIN1, SOCS1, PDGFC, ATP6V0A4, SLIT2, SNCA, JUN, JUP, GSS, IGF2, GNG12, KLF3, KLF2, SDK1, GLRB, WT1, ID1, AGRN, CPEB2	655	895	16650	1.56211	0.999392	0.0208472	0.0193262
GOTERM_BP_FAT	GO:1902622~regulation of neutrophil migration	7	0.887199	0.00114049	IL1R1, IL23A, C3AR1, XCL1, CCR7, SLIT2, CXCL3	655	31	16650	5.73997	0.999425	0.0209453	0.0194171
GOTERM_BP_FAT	GO:0048659~smooth muscle cell proliferation	13	1.64766	0.00117742	HDAC4, PTGIR, JUN, CDKN1B, IL13, PDGFB, RETN, PTGS2, THBS1, RBPMS2, PPARG, TRIB1, IL6R	655	109	16650	3.03172	0.999548	0.0215629	0.0199897
GOTERM_BP_FAT	GO:0043405~regulation of MAP kinase activity	26	3.29531	0.00118462	SHC2, HTR2B, PDGFB, CXCR4, PTPRJ, THBS1, RGS3, IRAK2, PDGFC, MAP3K8, S1PR2, MAP3K4, DUSP4, MEF2C, GADD45A, CD300A, DAB2IP, ADRA2B, DUSP9, VEGFA, MAPKAPK2, TLR9, SPRY2, CD24, TRIB1, TRIB2	655	327	16650	2.02115	0.999569	0.0216343	0.0200559
GOTERM_BP_FAT	GO:0043547~positive regulation of GTPase activity	42	5.32319	0.00119697	DOCK5, SPTBN5, SHC2, CSF2, CCL3L1, DENND5B, DOCK9, CCL4L2, RGS16, C15ORF62, HTR2B, PDGFB, ARHGAP18, RASAL1, ASAP2, PREX2, FGD4, FGD5, RGS3, RASGEF1C, PLEKHG4B, TAGAP, EPS8L2, CCR7, EVI5, STARD13, JUN, PTGIR, CCL22, ANGPT1, CCL20, ARHGEF39, DAB2IP, RHOG, ARHGAP29, GFRA1, ARHGAP25, ADCYAP1, XCL2, XCL1, ITGA6, AGRN	655	634	16650	1.68396	0.999603	0.0217989	0.0202085
GOTERM_BP_FAT	GO:0098662~inorganic cation transmembrane transport	42	5.32319	0.00123933	RYR2, KCNK7, CXCL9, AHNAK, DENND5B, SLC23A1, HTR2B, ITPR1, NEDD4L, AKAP7, ATP2A1, KCNA6, SLC8A2, CACNA1I, CD19, NCS1, KCNMB4, CCR7, ATP6V0A4, TRPM6, SLC12A7, NTSR1, SNCA, PDE4D, IL13, KCNJ15, TRPV3, KCNAB1, ANK2, PKDREJ, ATP2B2, KCNJ18, ATP1B1, SLC9A2, CXCL10, GRIN3B, SLC6A8, SCNN1A, KCNQ3, TLR9, XCL1, PTPN3	655	635	16650	1.68131	0.999699	0.0224281	0.0207918
GOTERM_BP_FAT	GO:0045639~positive regulation of myeloid cell differentiation	11	1.39417	0.00124042	JUN, CASP8, KDM1A, IL23A, LEF1, LIF, TMEM64, INHBA, GATA2, RAB7B, TRIB1	655	81	16650	3.45208	0.999701	0.0224281	0.0207918
GOTERM_BP_FAT	GO:0072511~divalent inorganic cation transport	31	3.92902	0.00124181	RYR2, CXCL9, AHNAK, DENND5B, HTR2B, PDGFB, ITPR1, STC1, ATP2A1, PTGS2, SLC8A2, CACNA1I, PPP3CA, CD19, NCS1, CCR7, TRPM6, NTSR1, SNCA, PDE4D, IL13, NIPA1, TRPV3, ANK2, PKDREJ, ATP2B2, ATP1B1, CXCL10, GRIN3B, TLR9, XCL1	655	421	16650	1.87177	0.999704	0.0224281	0.0207918
GOTERM_BP_FAT	GO:0051282~regulation of sequestering of calcium ion	13	1.64766	0.00127555	RYR2, CXCL9, PDE4D, IL13, ITPR1, HTR2B, ANK2, CXCL10, CD19, XCL1, CCR7, NTSR1, SNCA	655	110	16650	3.00416	0.999762	0.0229739	0.0212978
GOTERM_BP_FAT	GO:2000116~regulation of cysteine-type endopeptidase activity	20	2.53485	0.00134861	EGLN3, CDKN1B, LEF1, FASLG, TNFRSF10A, CST7, THBS1, PAX2, VEGFA, BCL2L11, AIM2, CASP8, ADORA2A, PERP, CASP1, TNFSF10, NLRP3, PPARG, RAG1, SNCA	655	224	16650	2.26963	0.999853	0.0242232	0.0224559
GOTERM_BP_FAT	GO:0002690~positive regulation of leukocyte chemotaxis	11	1.39417	0.0013641	CXCL10, CXCL9, IL23A, C3AR1, F2RL1, XCL1, CCR7, CXCL3, THBS1, IL6R, VEGFA	655	82	16650	3.40998	0.999867	0.0244343	0.0226516
GOTERM_BP_FAT	GO:0036293~response to decreased oxygen levels	24	3.04183	0.00141172	PLK3, RYR2, ARNT2, EGLN3, CDKN1B, EPAS1, ITPR1, CXCR4, STC1, ADM, SLC2A4, ATP1B1, PTGS2, THBS1, CBFA2T3, APOLD1, VEGFA, NPPC, MMP14, PLAU, CASP1, CA9, CD24, CPEB2	655	295	16650	2.06806	0.999903	0.0252182	0.0233783
GOTERM_BP_FAT	GO:0045664~regulation of neuron differentiation	38	4.81622	0.00142188	FOXA1, CHRNA3, KDM1A, GFI1, NEDD4L, DTX1, RASAL1, GATA2, PTPRF, GLI3, PPP3CA, CDH4, SIX3, NCS1, SLIT1, RAC3, SLIT2, PLXNC1, PLXNA4, EOMES, MEF2C, UNC13A, BCL11A, DAB2IP, L1CAM, ADRA2B, SSH3, ETV5, NFATC4, VEGFA, SDK1, STX1B, ADCYAP1, BIN1, ID1, UST, PLXNB2, FGF13	655	560	16650	1.72492	0.999909	0.0253305	0.0234824
GOTERM_BP_FAT	GO:0050801~ion homeostasis	45	5.70342	0.00143573	RYR2, CXCL9, EPAS1, HTR2B, ITPR1, NEDD4L, CXCR4, STC1, ADM, FASLG, ATP2A1, LPAR4, GATA2, SLC8A2, CD19, FTH1, C3AR1, CCR7, ATP6V0A4, NTSR1, SNCA, PTGIR, EPHX2, CYP4F2, PDE4D, IL13, AVPR2, TMC8, KLHL3, ANK2, ATP2B2, TMEM64, ATP1B1, CYP4F12, SLC9A2, CXCL10, ADCYAP1, ADORA2A, CCKBR, LPAR6, SCNN1A, F2RL1, XCL1, CD24, SGK1	655	699	16650	1.63647	0.999917	0.0255076	0.0236466
GOTERM_BP_FAT	GO:0043534~blood vessel endothelial cell migration	10	1.26743	0.0014534	STARD13, ANGPT1, ID1, PDGFB, AMOTL1, SLIT2, PTGS2, THBS1, HDAC9, VEGFA	655	69	16650	3.68404	0.999926	0.0256821	0.0238083
GOTERM_BP_FAT	GO:0042509~regulation of tyrosine phosphorylation of STAT protein	10	1.26743	0.0014534	SOCS1, CSF2, IL23A, CLCF1, IL13, IL31RA, LIF, IL6R, TNFRSF1A, VEGFA	655	69	16650	3.68404	0.999926	0.0256821	0.0238083
GOTERM_BP_FAT	GO:0051208~sequestering of calcium ion	13	1.64766	0.00149216	RYR2, CXCL9, PDE4D, IL13, ITPR1, HTR2B, ANK2, CXCL10, CD19, XCL1, CCR7, NTSR1, SNCA	655	112	16650	2.95052	0.999942	0.0261807	0.0242706
GOTERM_BP_FAT	GO:0042060~wound healing	37	4.68948	0.00149747	KDM1A, DOCK9, DGKA, PLEK, DYSF, PDGFB, ITPR1, PLG, GATA2, THBS1, GLI3, EPB41L4B, PLAU, PDGFC, DSP, ANXA1, CCL20, MCAM, CYP4F2, KRT1, FAM46A, ANXA5, RHOG, AP3B1, CYP4F11, ADRA2B, RHOB, F5, SELP, ADORA2A, NINJ1, CD9, F2RL1, PRKCQ, ZFPM1, KLKB1, PHLDB2	655	542	16650	1.7353	0.999944	0.0261807	0.0242706
GOTERM_BP_FAT	GO:0032101~regulation of response to external stimulus	46	5.83016	0.00149761	CXCL9, CCL3L1, CCL4L2, PLEK, PDGFB, CXCR4, PLG, CXCL3, PTGS2, THBS1, PTPRF, SPN, IL1RL2, PLAU, CASP1, C3AR1, SUSD4, NLRP3, CCR7, SLIT2, PLXNC1, IL6R, PLXNA4, ANXA1, IL1R1, IL1R2, KRT1, FAM46A, TNFRSF1A, VEGFA, SELP, CXCL10, ADCYAP1, AIM2, ADORA2A, IL23A, TLR9, XCL2, F2RL1, XCL1, PRKCQ, PPARG, TRIB1, KLKB1, PHLDB2, MGLL	655	721	16650	1.62179	0.999944	0.0261807	0.0242706
GOTERM_BP_FAT	GO:0060078~regulation of postsynaptic membrane potential	11	1.39417	0.00149764	GABRB3, STX1B, ADCYAP1, PPP3CA, MEF2C, CHRNA3, ADORA2A, NETO1, S1PR2, NTSR1, SNCA	655	83	16650	3.3689	0.999944	0.0261807	0.0242706
GOTERM_BP_FAT	GO:0090102~cochlea development	8	1.01394	0.00150874	GABRB3, TBX1, GABRB2, ATP2B2, GATA2, PAX2, TSHR, CTHRC1	655	44	16650	4.62179	0.999948	0.026294	0.0243757
GOTERM_BP_FAT	GO:0007605~sensory perception of sound	15	1.90114	0.00151217	GABRB3, TBX1, GABRB2, CDKN1B, ATP2B2, MYO7A, FAM107B, GJB2, MYO1A, MYO15A, LRIG1, OTOF, SPRY2, ATP6V0A4, TECTA	655	143	16650	2.66642	0.99995	0.026294	0.0243757
GOTERM_BP_FAT	GO:0098655~cation transmembrane transport	45	5.70342	0.00157129	RYR2, KCNK7, CHRNA3, CXCL9, AHNAK, DENND5B, SLC23A1, CHRNA6, SLC22A1, HTR2B, ITPR1, NEDD4L, AKAP7, ATP2A1, KCNA6, SLC8A2, CACNA1I, CD19, NCS1, KCNMB4, CCR7, ATP6V0A4, TRPM6, SLC12A7, NTSR1, SNCA, PDE4D, IL13, KCNJ15, TRPV3, KCNAB1, ANK2, PKDREJ, ATP2B2, KCNJ18, ATP1B1, SLC9A2, CXCL10, GRIN3B, SLC6A8, SCNN1A, KCNQ3, TLR9, XCL1, PTPN3	655	703	16650	1.62716	0.999966	0.0272495	0.0252614
GOTERM_BP_FAT	GO:0042035~regulation of cytokine biosynthetic process	12	1.52091	0.00159112	SPN, MAST4, CCL20, EBI3, MAPKAPK2, TLR9, PRKCQ, INHBA, THBS1, TRIB2, ZFPM1, UBE2J1	655	98	16650	3.11263	0.99997	0.0275204	0.0255126
GOTERM_BP_FAT	GO:0002040~sprouting angiogenesis	10	1.26743	0.00161099	CCBE1, STARD13, ANGPT1, LEF1, NRARP, SLIT2, PTGS2, THBS1, HDAC9, VEGFA	655	70	16650	3.63141	0.999974	0.0277906	0.025763
GOTERM_BP_FAT	GO:0032147~activation of protein kinase activity	24	3.04183	0.00161942	CHRNA3, SHC2, ANGPT1, GADD45A, CD300A, DAB2IP, PDGFB, CXCR4, TNFRSF10A, ADCY1, THBS1, ADRA2B, DUSP9, VEGFA, SOCS1, IRAK2, IL23A, PDGFC, MAPKAPK2, MAP3K8, S1PR2, FGF13, IL6R, MAP3K4	655	298	16650	2.04724	0.999975	0.0278625	0.0258297
GOTERM_BP_FAT	GO:0030193~regulation of blood coagulation	11	1.39417	0.00164159	SELP, PLAU, FAM46A, KRT1, PLEK, PDGFB, F2RL1, PRKCQ, PLG, THBS1, KLKB1	655	84	16650	3.32879	0.999978	0.0280962	0.0260463
GOTERM_BP_FAT	GO:1900046~regulation of hemostasis	11	1.39417	0.00164159	SELP, PLAU, FAM46A, KRT1, PLEK, PDGFB, F2RL1, PRKCQ, PLG, THBS1, KLKB1	655	84	16650	3.32879	0.999978	0.0280962	0.0260463
GOTERM_BP_FAT	GO:0042592~homeostatic process	89	11.2801	0.00164981	FOXA1, RYR2, CXCL9, KDM1A, NCF2, HTR2B, ADM, FASLG, ATP2A1, IKZF1, DBH, SLC2A4, CLDN1, HK2, SLC8A2, GPR174, PPP3CA, RASSF2, CDH2, SIT1, FTH1, LIPG, C3AR1, TNKS1BP1, RAC3, CCR7, LDLRAP1, SLC12A7, SOX4, MAP3K4, RAG1, PTGIR, MEF2C, ANXA1, PDE4D, TSC22D3, KRT1, IL13, AVPR2, TMC8, ANK2, ATP1B1, PAX2, MUC5AC, SLC9A2, ADCYAP1, ADORA2A, CCKBR, SCNN1A, TLR9, XCL1, PRKCQ, PPARG, SGK1, ZFPM1, PIF1, EPAS1, I…	655	1645	16650	1.3753	0.99998	0.028163	0.0261083
GOTERM_BP_FAT	GO:1901615~organic hydroxy compound metabolic process	30	3.80228	0.00166396	ACSS2, RDH8, EPAS1, GFI1, HDC, PLEK, LRP2, DBH, NUDT11, INPP5A, ALDH2, RDH10, LDLRAP1, APOL1, CGA, PLTP, NTSR1, SNCA, FDPS, NUS1, CYP4F2, SORD, APOBR, ATP2B2, CYP4F12, SGPP2, ZEB2, ALDH1A2, PLCH1, PLCB2	655	410	16650	1.85999	0.999981	0.0283093	0.0262439
GOTERM_BP_FAT	GO:0050776~regulation of immune response	55	6.97085	0.00166704	ITK, GFI1, PTPRJ, SPN, PPP3CA, CASP8, MYB, C3AR1, CCR7, MEF2C, ANXA1, CD300A, PDE4D, KRT1, IL13, GAB2, PARP9, LAT2, CLEC4A, FGR, ADCYAP1, AIM2, IL23A, MAPKAPK2, GCSAML, TLR9, XCL1, CD48, PRKCQ, PPARG, RAB7B, ZP4, COL17A1, NLRC5, CD1C, GATA2, CD1A, SOCS1, IRAK2, CD19, SUSD4, SLAMF7, NLRP3, PAG1, SLAMF1, JUN, HLA-DRB5, ANGPT1, PLCL2, DAB2IP, CLEC2B, CLCF1, F2RL1, CD24, CD200	655	912	16650	1.533	0.999982	0.0283093	0.0262439
GOTERM_BP_FAT	GO:0061138~morphogenesis of a branching epithelium	17	2.15463	0.0016775	FOXA1, LAMA5, PTCH1, LEF1, HMGA2, NRARP, ADM, GLI3, PAX2, NFATC4, VEGFA, MMP14, COL4A1, WT1, RDH10, SPRY2, SLIT2	655	177	16650	2.44145	0.999983	0.0284132	0.0263402
GOTERM_BP_FAT	GO:0051128~regulation of cellular component organization	119	15.0824	0.00168613	FOXA1, CSF2, KDM1A, GFI1, EPS8, CDH4, CAPN6, CDH2, MYB, TNFSF10, PLXNC1, MAP3K4, MEF2C, UNC13A, CD300A, MID1, STX1B, ADCYAP1, BIN1, FSCN1, PRKCQ, PHLDB2, PIF1, MAGEL2, CHRNA3, SPTBN5, PDGFB, NEDD4L, ARHGAP18, RASAL1, GATA2, FBXO43, CAMSAP2, STRIP2, BCL2L11, FLRT2, EVI5, PLXNA4, SLAMF1, VASP, JUN, BCL11A, CRIM1, LIF, IGF2, OSGIN1, INHBA, L1CAM, SSH3, ESR2, NFATC4, SELP, CAMSAP3, CXCL10, SDK1, DAB2…	655	2323	16650	1.30218	0.999984	0.0284855	0.0264073
GOTERM_BP_FAT	GO:0010631~epithelial cell migration	20	2.53485	0.00169178	DOCK5, CCBE1, STARD13, BMP10, JUN, ANGPT1, DAB2IP, PDGFB, STC1, PTGS2, HDAC9, THBS1, RHOB, VEGFA, EPB41L4B, ZEB2, ID1, FAT2, SLIT2, AMOTL1	655	228	16650	2.22981	0.999984	0.0285074	0.0264275
GOTERM_BP_FAT	GO:0006941~striated muscle contraction	16	2.02788	0.00171685	DSP, HDAC4, RYR2, ARG2, BMP10, JUP, CCDC78, PDE4D, STC1, NEDD4L, ATP2A1, ANK2, ATP1B1, RCSD1, MYL4, FGF13	655	161	16650	2.5262	0.999987	0.0288554	0.0267502
GOTERM_BP_FAT	GO:0001890~placenta development	15	1.90114	0.0017261	EOMES, CSF2, EPAS1, LEF1, PDGFB, LIF, STC1, ADM, PCDH12, GATA2, PTGS2, GJB2, CASP8, PPARG, MAP3K4	655	145	16650	2.62964	0.999988	0.0288624	0.0267567
GOTERM_BP_FAT	GO:0008360~regulation of cell shape	15	1.90114	0.0017261	ANXA1, C15ORF62, ARHGAP18, ATP10A, VEGFA, EPS8, FGR, FGD4, FGD5, STRIP2, BAMBI, GAS2, PLXNB2, RHOU, FERMT2	655	145	16650	2.62964	0.999988	0.0288624	0.0267567
GOTERM_BP_FAT	GO:0051090~regulation of sequence-specific DNA binding transcription factor activity	28	3.5488	0.00173595	HDAC4, FOXA1, KDM1A, GFI1, NLRC5, PPP3CA, ZIC2, IRAK2, PIM1, NLRP3, JUN, JUP, PTCH1, DAB2IP, HMGA2, ARID5B, ESR2, VEGFA, AIM2, ID1, TLR9, ID3, XCL1, PRKCQ, PPARG, RAB7B, TRIB1, SGK1	655	373	16650	1.90819	0.999988	0.0289531	0.0268408
GOTERM_BP_FAT	GO:0051051~negative regulation of transport	32	4.05577	0.00177705	NEDD4L, STC1, PTGS2, THBS1, UBE2J1, PPP3CA, MXI1, GRB10, DACT3, NLRP3, IL36RN, SOX4, NTSR1, SNCA, SLAMF1, SRGN, ANXA1, ANGPT1, CD300A, CYP4F2, TNFRSF9, IL1R2, AVPR2, DAB2IP, LIF, ANO9, KCNAB1, INHBA, ADRA2B, ADCYAP1, TLR9, F2RL1	655	450	16650	1.80763	0.999991	0.0295632	0.0274063
GOTERM_BP_FAT	GO:0001933~negative regulation of protein phosphorylation	29	3.67554	0.00179501	CDKN1B, FAM129A, PTPRJ, PPM1E, FOXO1, SOCS1, RASSF2, RGS3, FLRT2, SH3BP5, SLIT2, SNCA, DUSP4, JUN, CDKN2C, ANGPT1, GADD45A, CD300A, PDE4D, DAB2IP, LIF, DUSP9, ADORA2A, PARD3, SPRY2, F2RL1, TRIB1, TRIB2, ATF3	655	393	16650	1.87576	0.999992	0.0297863	0.0276132
GOTERM_BP_FAT	GO:0001763~morphogenesis of a branching structure	18	2.28137	0.00180593	FOXA1, LAMA5, PTCH1, LEF1, HMGA2, NRARP, ADM, ETV5, GLI3, PAX2, NFATC4, VEGFA, MMP14, COL4A1, WT1, RDH10, SPRY2, SLIT2	655	195	16650	2.34645	0.999993	0.0298915	0.0277107
GOTERM_BP_FAT	GO:0071396~cellular response to lipid	35	4.43599	0.00183559	FOXA1, RARG, CSF2, CEBPE, GFI1, LEF1, RORC, STC1, RORB, ADCY1, FOXO1, IRAK2, PIM1, NLRP3, TBX1, MEF2C, ANXA1, CCL20, PDE4D, PTCH1, DAB2IP, HMGA2, INHBA, SSTR3, PAX2, ESR2, CXCL10, ADCYAP1, DAB2, ALDH1A2, KLF9, ID3, PPARG, TRIB1, CCDC62	655	509	16650	1.74793	0.999994	0.0303058	0.0280947
GOTERM_BP_FAT	GO:0009611~response to wounding	42	5.32319	0.00187074	KDM1A, DOCK9, DGKA, PLEK, DYSF, PDGFB, ITPR1, ADM, PLG, GATA2, THBS1, PTPRF, GLI3, EPB41L4B, PLAU, MDK, PDGFC, DSP, JUN, ANXA1, CCL20, MCAM, CYP4F2, KRT1, FAM46A, ANXA5, RHOG, AP3B1, CYP4F11, ADRA2B, RHOB, F5, SELP, ADORA2A, NINJ1, ID3, CD9, F2RL1, PRKCQ, ZFPM1, KLKB1, PHLDB2	655	649	16650	1.64504	0.999995	0.0307927	0.0285462
GOTERM_BP_FAT	GO:0002688~regulation of leukocyte chemotaxis	12	1.52091	0.0018745	CXCL10, CXCL9, IL23A, C3AR1, F2RL1, XCL1, CCR7, SLIT2, CXCL3, THBS1, IL6R, VEGFA	655	100	16650	3.05038	0.999995	0.0307927	0.0285462
GOTERM_BP_FAT	GO:0009725~response to hormone	52	6.59062	0.00189609	FOXA1, IL22, RARG, CDKN1B, RORC, ADM, RORB, PRL, SLC2A4, MDK, TNFSF10, GRB10, CCR7, PTGIR, MEF2C, ANXA1, AVPR2, SORD, SSTR3, ADCYAP1, MMP14, TXNIP, PRKCQ, PPARG, AGXT, HDAC4, RNASEL, LEF1, STC1, RETN, ADCY1, PTGS2, HDAC9, THBS1, FOXO1, REPIN1, SOCS1, ATP6V0A4, SLIT2, CGA, JUN, IGF2, HMGA2, INHBA, GNG12, ESR2, TSHR, GJB2, DAB2, WT1, KLF9, CPEB2	655	854	16650	1.54781	0.999996	0.0310276	0.0287639
GOTERM_BP_FAT	GO:0001667~ameboidal-type cell migration	25	3.16857	0.00189829	DOCK5, LAMA5, BMP10, LEF1, HTR2B, PDGFB, STC1, PTGS2, HDAC9, THBS1, EPB41L4B, SLIT2, TBX1, CCBE1, STARD13, JUN, ANGPT1, DAB2IP, ARID5B, RHOB, VEGFA, ZEB2, ID1, FAT2, AMOTL1	655	320	16650	1.98593	0.999996	0.0310276	0.0287639
GOTERM_BP_FAT	GO:0043270~positive regulation of ion transport	19	2.40811	0.00190321	RYR2, CXCL9, CYP4F2, IL13, PDGFB, TRPV3, AKAP7, STC1, ATP2B2, ANK2, ATP1B1, CXCL10, ADORA2A, CD19, XCL1, SGK1, SLC38A3, NTSR1, SNCA	655	213	16650	2.2675	0.999996	0.0310304	0.0287665
GOTERM_BP_FAT	GO:0006875~cellular metal ion homeostasis	34	4.30925	0.00191308	RYR2, CXCL9, HTR2B, ITPR1, NEDD4L, CXCR4, STC1, ADM, ATP2A1, LPAR4, GATA2, SLC8A2, CD19, FTH1, C3AR1, CCR7, NTSR1, SNCA, PTGIR, EPHX2, PDE4D, IL13, ANK2, ATP2B2, TMEM64, ATP1B1, CXCL10, ADCYAP1, CCKBR, LPAR6, F2RL1, XCL1, CD24, SGK1	655	491	16650	1.76023	0.999996	0.0311137	0.0288437
GOTERM_BP_FAT	GO:0045892~negative regulation of transcription, DNA-templated	65	8.23828	0.00194234	FOXA1, RARG, CDKN1B, KDM1A, GFI1, WWC2, NRARP, FASLG, IKZF1, RORB, GLI3, IKZF4, ZIC2, SIX3, MYB, WWC3, JARID2, EOMES, HES6, MEF2C, TLE1, TSC22D3, ZBTB32, ARID5B, CBFA2T3, RUNX3, PAX2, ETV6, ZEB2, TXNIP, HOXB3, XCL1, PPARG, ZFPM1, ATF3, HDAC4, MAGEL2, SATB1, LEF1, PDGFB, NEDD4L, GATA2, HDAC9, FOXO1, PURB, PCBP3, ZNF268, SNCA, PLK3, JUN, BCL11A, PTCH1, DAB2IP, HMGA2, ESR2, NFATC4, VEGFA, DAB2, PER3…	655	1130	16650	1.4622	0.999997	0.0315113	0.0292123
GOTERM_BP_FAT	GO:0090132~epithelium migration	20	2.53485	0.00195014	DOCK5, CCBE1, STARD13, BMP10, JUN, ANGPT1, DAB2IP, PDGFB, STC1, PTGS2, HDAC9, THBS1, RHOB, VEGFA, EPB41L4B, ZEB2, ID1, FAT2, SLIT2, AMOTL1	655	231	16650	2.20085	0.999997	0.0315595	0.029257
GOTERM_BP_FAT	GO:0060548~negative regulation of cell death	54	6.84411	0.00196599	GABRB3, GABRB2, RARG, CDKN1B, CSF2, KDM1A, HTR2B, RORC, FASLG, GLI3, CASP8, CCND2, MDK, CREB3L1, TNFSF10, PIM1, CCR7, PDE8A, SOX4, RAG1, MEF2C, ANXA1, TLE1, TSC22D3, IL13, ANXA5, PAX2, ADCYAP1, ADORA2A, ITGA6, PRKCQ, BCL2A1, LEF1, AMIGO2, THBS1, FOXO1, ZNF268, NTSR1, SNCA, TBX1, ARNT2, PLK3, JUN, ANGPT1, IL31RA, HMGA2, TNFRSF10A, TNFRSF10D, VEGFA, DAB2, WT1, CLCF1, ID1, SPRY2	655	897	16650	1.53029	0.999997	0.0317143	0.0294005
GOTERM_BP_FAT	GO:0055078~sodium ion homeostasis	8	1.01394	0.00196941	ADORA2A, CYP4F2, SCNN1A, AVPR2, NEDD4L, ATP1B1, SGK1, CYP4F12	655	46	16650	4.42084	0.999997	0.0317143	0.0294005
GOTERM_BP_FAT	GO:0006836~neurotransmitter transport	18	2.28137	0.00201353	RAB3B, BRSK1, MEF2C, CHRNA3, SLC6A19, UNC13A, SLC32A1, GAD1, SLC22A1, C2CD4C, SYN2, SYTL3, STX1B, SLC6A8, ADORA2A, OTOF, KCNMB4, SNCA	655	197	16650	2.32263	0.999998	0.0322835	0.0299281
GOTERM_BP_FAT	GO:0051254~positive regulation of RNA metabolic process	78	9.88593	0.00201463	FOXA1, RARG, BMP10, KDM1A, IL26, RORC, HOXC13, IKZF1, RORB, GLI3, IKZF4, PPP3CA, ZIC2, MDK, CREB3L1, SIX3, MYB, TEAD1, SOX4, EOMES, MEF2C, RHOG, ATP1B4, RUNX3, ETV5, PAX2, ETV6, TNFRSF1A, ADCYAP1, ZEB2, PSRC1, IL23A, TLR9, ITGA6, PPARG, ZFPM1, ATF3, CREB5, HDAC4, RNASEL, CEBPE, EPAS1, LEF1, PDGFB, NLRC5, GATA2, FOXO1, NLRP3, CGA, SLC38A3, ZNF268, TBX1, ARNT2, JUN, BCL11A, PTCH1, DAB2IP, LIF, IL31…	655	1415	16650	1.40124	0.999998	0.0322835	0.0299281
GOTERM_BP_FAT	GO:0040008~regulation of growth	42	5.32319	0.00202509	BMP10, CDKN1B, WWC2, LEF1, NEDD4L, PTPRJ, RASAL1, PRL, NPPC, CDH4, SOCS1, BCL2L11, WWC3, DACT3, SLIT2, PLXNC1, CGA, PLXNA4, MEF2C, CDKN2C, UNC13A, BCL11A, PTCH1, DAB2IP, CRIM1, OSGIN1, TMC8, HMGA2, INHBA, L1CAM, TSHR, ESR2, VEGFA, MMP14, PSRC1, KRT17, WT1, PRKCQ, PPARG, FGF13, AGRN, SGK1	655	652	16650	1.63747	0.999998	0.0323718	0.03001
GOTERM_BP_FAT	GO:0001822~kidney development	22	2.78834	0.00203293	LAMA5, ARG2, MEF2C, ANGPT1, PTCH1, PDGFB, LIF, ARID5B, KLHL3, NID1, GLI3, PAX2, VEGFA, BCL2L11, WT1, RDH10, ALDH1A2, DACT2, ID3, SLIT2, CD24, SOX4	655	267	16650	2.09452	0.999998	0.0324178	0.0300526
GOTERM_BP_FAT	GO:0031344~regulation of cell projection organization	38	4.81622	0.00204778	HDAC4, CHRNA3, KDM1A, GFI1, C15ORF62, NEDD4L, RASAL1, PTPRF, PPP3CA, CDH4, NCS1, SLIT1, EPS8L2, CCR7, SLIT2, PLXNC1, EVI5, PLXNA4, MEF2C, UNC13A, BCL11A, DAB2IP, RHOG, L1CAM, SSH3, NFATC4, VEGFA, SDK1, STX1B, ADCYAP1, ID1, UST, FSCN1, SPRY2, F2RL1, PLXNB2, FGF13, AGRN	655	572	16650	1.68873	0.999998	0.0325751	0.0301985
GOTERM_BP_FAT	GO:0050671~positive regulation of lymphocyte proliferation	14	1.7744	0.00208432	MEF2C, ANXA1, EBI3, IL13, IGF2, SPN, TMIGD2, IL23A, CLCF1, XCL1, PRKCQ, CD24, ZP4, SLAMF1	655	132	16650	2.69604	0.999999	0.0330759	0.0306628
GOTERM_BP_FAT	GO:1903507~negative regulation of nucleic acid-templated transcription	67	8.49176	0.0021183	FOXA1, RARG, CDKN1B, KDM1A, GFI1, WWC2, NRARP, FASLG, IKZF1, RORB, GLI3, IKZF4, ZIC2, SIX3, MYB, WWC3, JARID2, EOMES, HES6, MEF2C, TLE1, TSC22D3, ZBTB32, ARID5B, CBFA2T3, RUNX3, PAX2, ETV6, ZEB2, TXNIP, HOXB3, XCL1, PPARG, ZFPM1, ATF3, HDAC4, MAGEL2, SATB1, LEF1, PDGFB, NEDD4L, GATA2, HDAC9, FOXO1, PURB, PCBP3, MXI1, TBL1Y, ZNF268, SNCA, PLK3, JUN, BCL11A, PTCH1, DAB2IP, HMGA2, ESR2, NFATC4, VEGF…	655	1177	16650	1.44701	0.999999	0.0335338	0.0310872
GOTERM_BP_FAT	GO:0006919~activation of cysteine-type endopeptidase activity involved in apoptotic process	11	1.39417	0.00214194	EGLN3, BCL2L11, CDKN1B, CASP8, CASP1, TNFSF10, NLRP3, FASLG, PPARG, TNFRSF10A, SNCA	655	87	16650	3.214	0.999999	0.0337445	0.0312826
GOTERM_BP_FAT	GO:0006942~regulation of striated muscle contraction	11	1.39417	0.00214194	DSP, HDAC4, RYR2, BMP10, JUP, PDE4D, STC1, ATP2A1, ANK2, ATP1B1, FGF13	655	87	16650	3.214	0.999999	0.0337445	0.0312826
GOTERM_BP_FAT	GO:0051279~regulation of release of sequestered calcium ion into cytosol	10	1.26743	0.00216744	RYR2, CXCL10, CXCL9, CD19, PDE4D, IL13, XCL1, ANK2, NTSR1, SNCA	655	73	16650	3.48217	0.999999	0.0339274	0.0314521
GOTERM_BP_FAT	GO:0007260~tyrosine phosphorylation of STAT protein	10	1.26743	0.00216744	SOCS1, CSF2, IL23A, CLCF1, IL13, IL31RA, LIF, IL6R, TNFRSF1A, VEGFA	655	73	16650	3.48217	0.999999	0.0339274	0.0314521
GOTERM_BP_FAT	GO:1903169~regulation of calcium ion transmembrane transport	13	1.64766	0.00216911	RYR2, CXCL9, AHNAK, PDE4D, IL13, ANK2, ATP1B1, CXCL10, CD19, TLR9, XCL1, NTSR1, SNCA	655	117	16650	2.82443	0.999999	0.0339274	0.0314521
GOTERM_BP_FAT	GO:0050663~cytokine secretion	16	2.02788	0.00218583	SRGN, HLA-DRB5, ANXA1, ANGPT1, IL26, IL1R2, TNFRSF9, HTR2B, FGR, AIM2, CASP1, F2RL1, NLRP3, CCR7, IL36RN, SLAMF1	655	165	16650	2.46495	0.999999	0.0341072	0.0316188
GOTERM_BP_FAT	GO:0086004~regulation of cardiac muscle cell contraction	7	0.887199	0.00220094	DSP, RYR2, JUP, PDE4D, STC1, ANK2, FGF13	655	35	16650	5.08397	0.999999	0.0342614	0.0317617
GOTERM_BP_FAT	GO:0050730~regulation of peptidyl-tyrosine phosphorylation	19	2.40811	0.00222039	CSF2, ANGPT1, CD300A, IL13, PDGFB, LIF, IL31RA, IGF2, ADRA2B, TNFRSF1A, VEGFA, SOCS1, EHD4, IL23A, CLCF1, PDGFC, SH3BP5, CD24, IL6R	655	216	16650	2.23601	1	0.0344643	0.0319498
GOTERM_BP_FAT	GO:0032946~positive regulation of mononuclear cell proliferation	14	1.7744	0.00222943	MEF2C, ANXA1, EBI3, IL13, IGF2, SPN, TMIGD2, IL23A, CLCF1, XCL1, PRKCQ, CD24, ZP4, SLAMF1	655	133	16650	2.67577	1	0.0344643	0.0319498
GOTERM_BP_FAT	GO:0060759~regulation of response to cytokine stimulus	15	1.90114	0.00222979	ANGPT1, IL1R1, IL1R2, GFI1, NLRC5, PARP9, TNFRSF1A, CASP8, SOCS1, IRAK2, F2RL1, PPARG, IL36RN, SLIT2, CD24	655	149	16650	2.55905	1	0.0344643	0.0319498
GOTERM_BP_FAT	GO:0048008~platelet-derived growth factor receptor signaling pathway	8	1.01394	0.00223712	PTGIR, PDGFC, PDGFB, TXNIP, ARID5B, PTPRJ, SNCA, VEGFA	655	47	16650	4.32678	1	0.0344959	0.0319792
GOTERM_BP_FAT	GO:0051590~positive regulation of neurotransmitter transport	5	0.633714	0.00227696	RAB3B, STX1B, UNC13A, ADORA2A, SNCA	655	15	16650	8.47328	1	0.0349454	0.0323959
GOTERM_BP_FAT	GO:0072539~T-helper 17 cell differentiation	5	0.633714	0.00227696	IL23A, RORC, NLRP3, LY9, BATF	655	15	16650	8.47328	1	0.0349454	0.0323959
GOTERM_BP_FAT	GO:0071417~cellular response to organonitrogen compound	33	4.18251	0.00228924	GABRB3, GABRB2, RYR2, RNASEL, KDM1A, AKAP7, STC1, ADCY1, PRL, SLC2A4, PTGS2, HDAC9, FOXO1, REPIN1, SOCS1, PDGFC, GRB10, ATP6V0A4, SLIT2, SNCA, MEF2C, JUP, PDE4D, IGF2, GNG12, KLF3, KLF2, COL4A1, WT1, ID1, PRKCQ, PPARG, CPEB2	655	477	16650	1.75861	1	0.0350517	0.0324944
GOTERM_BP_FAT	GO:0055117~regulation of cardiac muscle contraction	10	1.26743	0.00238359	DSP, HDAC4, RYR2, BMP10, JUP, PDE4D, STC1, ANK2, ATP1B1, FGF13	655	74	16650	3.43511	1	0.036411	0.0337545
GOTERM_BP_FAT	GO:0045216~cell-cell junction organization	19	2.40811	0.00242629	DSP, LAMA5, JUP, PTPRJ, ANK2, THBS1, CLDN1, VEGFA, CAMSAP3, MMP14, CDH4, GJB2, CDH2, PARD3, PERP, FSCN1, CD9, PHLDB2, FERMT2	655	218	16650	2.21549	1	0.0369769	0.0342791
GOTERM_BP_FAT	GO:0048732~gland development	30	3.80228	0.00245289	FOXA1, LAMA5, RARG, CDKN1B, KDM1A, LEF1, PRL, GATA2, HK2, GLI3, BCL2L11, MDK, SIX3, JARID2, CGA, RAG1, TBX1, JUN, ANXA1, PTCH1, HMGA2, ARID5B, ATP2B2, VEGFA, ADCYAP1, CCKBR, WT1, ALDH1A2, HOXB3, PTPN3	655	421	16650	1.81139	1	0.0372953	0.0345743
GOTERM_BP_FAT	GO:0006937~regulation of muscle contraction	15	1.90114	0.00252389	DSP, HDAC4, DOCK5, RYR2, BMP10, CHRNA3, JUP, PDE4D, STC1, ATP2A1, ANK2, ATP1B1, PTGS2, ADRA2B, FGF13	655	151	16650	2.52515	1	0.0382858	0.0354926
GOTERM_BP_FAT	GO:1902624~positive regulation of neutrophil migration	6	0.760456	0.00254379	IL1R1, IL23A, C3AR1, XCL1, CCR7, CXCL3	655	25	16650	6.10076	1	0.0384241	0.0356207
GOTERM_BP_FAT	GO:0042531~positive regulation of tyrosine phosphorylation of STAT protein	9	1.14068	0.00254476	CSF2, IL23A, CLCF1, IL13, IL31RA, LIF, IL6R, TNFRSF1A, VEGFA	655	61	16650	3.75047	1	0.0384241	0.0356207
GOTERM_BP_FAT	GO:0045737~positive regulation of cyclin-dependent protein serine/threonine kinase activity	7	0.887199	0.00255488	CCND3, PSRC1, CDKN1B, CCND2, DAB2IP, PDGFB, PIM1	655	36	16650	4.94275	1	0.038488	0.03568
GOTERM_BP_FAT	GO:0090130~tissue migration	20	2.53485	0.0026045	DOCK5, CCBE1, STARD13, BMP10, JUN, ANGPT1, DAB2IP, PDGFB, STC1, PTGS2, HDAC9, THBS1, RHOB, VEGFA, EPB41L4B, ZEB2, ID1, FAT2, SLIT2, AMOTL1	655	237	16650	2.14513	1	0.0391215	0.0362673
GOTERM_BP_FAT	GO:0001558~regulation of cell growth	29	3.67554	0.0026089	BMP10, CDKN1B, LEF1, NEDD4L, PTPRJ, RASAL1, CDH4, DACT3, SLIT2, PLXNC1, PLXNA4, CDKN2C, UNC13A, BCL11A, CRIM1, OSGIN1, TMC8, INHBA, L1CAM, ESR2, VEGFA, MMP14, PSRC1, KRT17, WT1, PRKCQ, PPARG, FGF13, SGK1	655	403	16650	1.82922	1	0.0391215	0.0362673
GOTERM_BP_FAT	GO:0002009~morphogenesis of an epithelium	35	4.43599	0.00268342	FOXA1, LAMA5, RYR2, RARG, LEF1, NRARP, ADM, GLI3, RDH10, CA9, SLIT2, SOX4, CTHRC1, VASP, STARD13, MEF2C, PTCH1, LIF, HMGA2, MICAL2, KLHL3, PAX2, RHOB, NFATC4, VEGFA, VANGL1, DAB2, MMP14, KRT17, COL4A1, WT1, ALDH1A2, SPRY2, PLXNB2, PHLDB2	655	521	16650	1.70767	1	0.0401469	0.0372178
GOTERM_BP_FAT	GO:0010634~positive regulation of epithelial cell migration	12	1.52091	0.00276592	DOCK5, EPB41L4B, CCBE1, JUN, ANGPT1, PDGFB, AMOTL1, PTGS2, THBS1, HDAC9, RHOB, VEGFA	655	105	16650	2.90513	1	0.0412867	0.0382745
GOTERM_BP_FAT	GO:0010720~positive regulation of cell development	33	4.18251	0.00281317	FOXA1, DOCK5, BMP10, TENM4, KDM1A, LEF1, NEDD4L, CXCR4, RASAL1, GATA2, GLI3, CDH4, RAC3, SLIT2, S1PR2, MEF2C, UNC13A, BCL11A, DAB2IP, LIF, L1CAM, ADRA2B, ETV5, PAX2, VEGFA, ADCYAP1, DAB2, BAMBI, BIN1, CLCF1, PLXNB2, PPARG, TRIB1	655	483	16650	1.73676	1	0.0418963	0.0388396
GOTERM_BP_FAT	GO:0032355~response to estradiol	13	1.64766	0.00287558	FOXA1, MBD4, ARNT2, CDKN1B, ANXA1, PTCH1, PTGS2, SSTR3, GJB2, CASP8, ALDH1A2, TXNIP, CCDC62	655	121	16650	2.73106	1	0.0426316	0.0395213
GOTERM_BP_FAT	GO:0050921~positive regulation of chemotaxis	13	1.64766	0.00287558	CXCL9, PDGFB, CXCL3, THBS1, VEGFA, CXCL10, IL23A, C3AR1, F2RL1, XCL1, CCR7, SLIT2, IL6R	655	121	16650	2.73106	1	0.0426316	0.0395213
GOTERM_BP_FAT	GO:0043583~ear development	18	2.28137	0.00290431	GABRB3, TBX1, GABRB2, CDKN1B, ATP2B2, MYO7A, GATA2, GLI3, PAX2, TSHR, BCL2L11, MYO15A, RDH10, MAPKAPK2, LRIG1, SPRY2, LRIG3, CTHRC1	655	204	16650	2.24293	1	0.0429601	0.0398258
GOTERM_BP_FAT	GO:0006936~muscle contraction	25	3.16857	0.00294541	HDAC4, DOCK5, MYOM1, RYR2, BMP10, CHRNA3, HTR2B, DYSF, NEDD4L, STC1, ATP2A1, RCSD1, PTGS2, DSP, ARG2, JUP, CCDC78, PDE4D, ANK2, ATP1B1, ADRA2B, MYL4, SLC6A8, FGF13, SNTB1	655	331	16650	1.91993	1	0.0434215	0.0402535
GOTERM_BP_FAT	GO:1902679~negative regulation of RNA biosynthetic process	67	8.49176	0.00294878	FOXA1, RARG, CDKN1B, KDM1A, GFI1, WWC2, NRARP, FASLG, IKZF1, RORB, GLI3, IKZF4, ZIC2, SIX3, MYB, WWC3, JARID2, EOMES, HES6, MEF2C, TLE1, TSC22D3, ZBTB32, ARID5B, CBFA2T3, RUNX3, PAX2, ETV6, ZEB2, TXNIP, HOXB3, XCL1, PPARG, ZFPM1, ATF3, HDAC4, MAGEL2, SATB1, LEF1, PDGFB, NEDD4L, GATA2, HDAC9, FOXO1, PURB, PCBP3, MXI1, TBL1Y, ZNF268, SNCA, PLK3, JUN, BCL11A, PTCH1, DAB2IP, HMGA2, ESR2, NFATC4, VEGF…	655	1194	16650	1.42641	1	0.0434215	0.0402535
GOTERM_BP_FAT	GO:0021987~cerebral cortex development	12	1.52091	0.00297968	EOMES, XAB2, KDM1A, BCL2A1, CDH2, MDK, DAB2IP, LHX6, SLIT2, FGF13, GNG12, GLI3	655	106	16650	2.87772	1	0.0437779	0.0405839
GOTERM_BP_FAT	GO:0043542~endothelial cell migration	15	1.90114	0.00302434	CCBE1, STARD13, BMP10, ANGPT1, DAB2IP, PDGFB, STC1, PTGS2, HDAC9, THBS1, RHOB, VEGFA, ID1, SLIT2, AMOTL1	655	154	16650	2.47596	1	0.0443344	0.0410999
GOTERM_BP_FAT	GO:0090022~regulation of neutrophil chemotaxis	6	0.760456	0.00304911	IL23A, C3AR1, XCL1, CCR7, SLIT2, CXCL3	655	26	16650	5.86612	1	0.0445976	0.0413438
GOTERM_BP_FAT	GO:0007259~JAK-STAT cascade	16	2.02788	0.00308509	IL22, CSF2, CD300A, IL26, IL13, LIF, IL31RA, HMGA2, PRL, TNFRSF1A, VEGFA, SOCS1, FLRT2, IL23A, CLCF1, IL6R	655	171	16650	2.37847	1	0.0450231	0.0417383
GOTERM_BP_FAT	GO:0050727~regulation of inflammatory response	24	3.04183	0.00314329	ANXA1, CCL3L1, IL1R1, IL1R2, CCL4L2, KRT1, PTGS2, TNFRSF1A, SPN, ADCYAP1, IL1RL2, ADORA2A, IL23A, CASP1, C3AR1, SUSD4, TLR9, XCL2, XCL1, NLRP3, CCR7, PPARG, KLKB1, MGLL	655	314	16650	1.94292	1	0.0457702	0.0424309
GOTERM_BP_FAT	GO:0048872~homeostasis of number of cells	19	2.40811	0.00320084	MEF2C, ANXA1, KDM1A, EPAS1, TSC22D3, INHBA, IKZF1, GATA2, KLF2, VEGFA, GPR174, BCL2L11, RASSF2, CDH2, SIT1, RAC3, CCR7, ZFPM1, RAG1	655	224	16650	2.15615	1	0.0464415	0.0430532
GOTERM_BP_FAT	GO:0010952~positive regulation of peptidase activity	15	1.90114	0.0032082	EGLN3, CDKN1B, PCOLCE2, FASLG, TNFRSF10A, MMP14, BCL2L11, AIM2, CASP8, PERP, CASP1, TNFSF10, NLRP3, PPARG, SNCA	655	155	16650	2.45999	1	0.0464415	0.0430532
GOTERM_BP_FAT	GO:0061005~cell differentiation involved in kidney development	8	1.01394	0.0032107	MEF2C, WT1, PTCH1, PDGFB, LIF, CD24, GLI3, PAX2	655	50	16650	4.06718	1	0.0464415	0.0430532
GOTERM_BP_FAT	GO:0031324~negative regulation of cellular metabolic process	118	14.9556	0.00324599	FOXA1, KDM1A, GFI1, WWC2, IKZF1, RORB, IKZF4, NPPC, RASSF2, RGS3, MYB, WWC3, GRB10, CHAC1, SOX4, RAG1, EOMES, HES6, SPINK2, MEF2C, TLE1, CD300A, IL1R2, ZBTB32, ARID5B, RUNX3, PARD3, TXNIP, HOXB3, TRIB1, TRIB2, ZFPM1, ATF3, PIF1, MAGEL2, GPR87, PDGFB, NEDD4L, GATA2, FBXO43, FOXO1, SOCS1, PCBP3, FLRT2, ZNF268, TMEM132D, PLK3, JUN, BCL11A, GADD45A, PTCH1, CRIM1, LIF, HMGA2, INHBA, ESR2, NFATC4, CAMS…	655	2345	16650	1.27912	1	0.0468483	0.0434304
GOTERM_BP_FAT	GO:0070665~positive regulation of leukocyte proliferation	14	1.7744	0.00328461	MEF2C, ANXA1, EBI3, IL13, IGF2, SPN, TMIGD2, IL23A, CLCF1, XCL1, PRKCQ, CD24, ZP4, SLAMF1	655	139	16650	2.56027	1	0.0473013	0.0438503
GOTERM_BP_FAT	GO:0030198~extracellular matrix organization	25	3.16857	0.00330408	LAMA5, PDGFB, PLG, ITGAE, NID1, THBS1, FLRT2, CREB3L1, SNCA, MMP8, HSPG2, MUC5AC, MMP14, MMP13, COL4A1, WT1, COL5A3, COL7A1, FSCN1, MATN1, ITGA6, COL9A3, AGRN, KLKB1, PHLDB2	655	334	16650	1.90268	1	0.0474771	0.0440133
GOTERM_BP_FAT	GO:0061061~muscle structure development	38	4.81622	0.00334659	HDAC4, LAMA5, RYR2, BMP10, CXCL9, KDM1A, EPAS1, LEF1, PDGFB, ADM, HDAC9, FGFRL1, PPP3CA, CDH2, GPC1, MYO18B, RBPMS2, FLNB, EOMES, TEAD4, DSP, TBX1, MEF2C, TSC22D3, LIF, ARID5B, KCNAB1, ANK2, NFATC4, VEGFA, CXCL10, OLFM2, MMP14, WT1, BIN1, ID3, ZFPM1, ATF3	655	589	16650	1.63999	1	0.0479825	0.0444818
GOTERM_BP_FAT	GO:0071622~regulation of granulocyte chemotaxis	7	0.887199	0.00338877	IL23A, C3AR1, XCL1, CCR7, SLIT2, CXCL3, THBS1	655	38	16650	4.6826	1	0.0482696	0.044748
GOTERM_BP_FAT	GO:0051281~positive regulation of release of sequestered calcium ion into cytosol	7	0.887199	0.00338877	CXCL10, CXCL9, CD19, IL13, XCL1, NTSR1, SNCA	655	38	16650	4.6826	1	0.0482696	0.044748
GOTERM_BP_FAT	GO:1904031~positive regulation of cyclin-dependent protein kinase activity	7	0.887199	0.00338877	CCND3, PSRC1, CDKN1B, CCND2, DAB2IP, PDGFB, PIM1	655	38	16650	4.6826	1	0.0482696	0.044748
GOTERM_BP_FAT	GO:0032970~regulation of actin filament-based process	25	3.16857	0.00341111	RYR2, SPTBN5, MAGEL2, BMP10, PLEK, C15ORF62, ARHGAP18, STC1, PPM1E, EPS8, CCR7, SLIT2, DSP, VASP, MEF2C, JUP, PDE4D, ANK2, SSH3, ID1, FSCN1, SPIRE1, F2RL1, FGF13, PHLDB2	655	335	16650	1.897	1	0.0483771	0.0448476
GOTERM_BP_FAT	GO:0043062~extracellular structure organization	25	3.16857	0.00341111	LAMA5, PDGFB, PLG, ITGAE, NID1, THBS1, FLRT2, CREB3L1, SNCA, MMP8, HSPG2, MUC5AC, MMP14, MMP13, COL4A1, WT1, COL5A3, COL7A1, FSCN1, MATN1, ITGA6, COL9A3, AGRN, KLKB1, PHLDB2	655	335	16650	1.897	1	0.0483771	0.0448476
GOTERM_BP_FAT	GO:0045165~cell fate commitment	20	2.53485	0.00343549	EOMES, FOXA1, TBX1, MEF2C, TENM4, EPAS1, PTCH1, RORC, GATA2, LY9, GLI3, PAX2, BATF, WT1, IL23A, SPRY2, PPARG, FGF13, ZNF521, ZFPM1	655	243	16650	2.09217	1	0.0485605	0.0450176
GOTERM_BP_FAT	GO:0055082~cellular chemical homeostasis	44	5.57668	0.0034389	RYR2, CXCL9, HTR2B, ITPR1, NEDD4L, CXCR4, STC1, ADM, FASLG, ATP2A1, LPAR4, GATA2, FOXO1, HK2, SLC8A2, PPP3CA, CD19, FTH1, C3AR1, CCR7, ATP6V0A4, SOX4, NTSR1, SNCA, PTGIR, MEF2C, HLA-DRB5, EPHX2, PDE4D, IL13, ANK2, ATP2B2, TMEM64, ATP1B1, PAX2, SLC9A2, CXCL10, ADCYAP1, CCKBR, LPAR6, F2RL1, XCL1, CD24, SGK1	655	713	16650	1.56869	1	0.0485605	0.0450176
GOTERM_BP_FAT	GO:0031175~neuron projection development	49	6.21039	0.00352333	KDM1A, GFI1, RAPH1, ADM, PTPRF, GLI3, PREX2, PPP3CA, CDH4, RAC3, PLXNC1, MEF2C, UNC13A, PAX2, STX1B, ADCYAP1, ADORA2A, PARD3, TLR9, PRKCQ, SGK1, BRSK1, SPTBN5, CHRNA3, NEDD4L, RASAL1, ADCY1, CAMSAP2, FLRT2, GPC1, SLIT1, SLIT2, PLXNA4, VASP, JUN, BCL11A, DAB2IP, L1CAM, SSH3, NFATC4, VEGFA, CAMSAP3, SDK1, EFNA3, EFNA2, ID1, UST, PLXNB2, FGF13	655	817	16650	1.52457	1	0.0496455	0.0460235
GOTERM_BP_FAT	GO:0021543~pallium development	15	1.90114	0.00360336	EOMES, MEF2C, SLC32A1, KDM1A, BCL2A1, LEF1, DAB2IP, GNG12, GLI3, XAB2, CDH2, MDK, LHX6, SLIT2, FGF13	655	157	16650	2.42865	1	0.0506641	0.0469677
GOTERM_BP_FAT	GO:0045637~regulation of myeloid cell differentiation	17	2.15463	0.00361398	JUN, MEF2C, RARG, KDM1A, ZBTB46, LEF1, LIF, INHBA, TMEM64, GATA2, PURB, CASP8, RASSF2, IL23A, RAB7B, TRIB1, ZFPM1	655	191	16650	2.2625	1	0.0506814	0.0469838
GOTERM_BP_FAT	GO:0051056~regulation of small GTPase mediated signal transduction	23	2.91508	0.0036201	STARD13, ARHGEF39, DAB2IP, RHOG, ARHGAP29, ARHGAP18, RASAL1, LPAR4, ARHGAP25, RHOB, PREX2, FGD4, FGD5, LPAR6, PLEKHG4B, TAGAP, F2RL1, SPRY2, RAC3, RHOU, EPS8L2, SLIT2, RHOV	655	299	16650	1.95537	1	0.0506814	0.0469838
GOTERM_BP_FAT	GO:0003014~renal system process	12	1.52091	0.00370181	CHRNA3, ADORA2A, CYP4F2, MCAM, AVPR2, PDGFB, F2RL1, STC1, KLHL3, ADCY1, SGK1, CYP4F12	655	109	16650	2.79852	1	0.0517145	0.0479416
GOTERM_BP_FAT	GO:0008625~extrinsic apoptotic signaling pathway via death domain receptors	10	1.26743	0.00373409	CASP8, TNFRSF9, DAB2IP, TNFSF10, FASLG, TNFRSF10A, THBS1, ATF3, TNFRSF10D, TNFRSF1A	655	79	16650	3.2177	1	0.0519482	0.0481581
GOTERM_BP_FAT	GO:0030003~cellular cation homeostasis	37	4.68948	0.00373442	RYR2, CXCL9, HTR2B, ITPR1, NEDD4L, CXCR4, STC1, ADM, FASLG, ATP2A1, LPAR4, GATA2, SLC8A2, CD19, FTH1, C3AR1, CCR7, ATP6V0A4, NTSR1, SNCA, PTGIR, EPHX2, PDE4D, IL13, ANK2, ATP2B2, TMEM64, ATP1B1, SLC9A2, CXCL10, ADCYAP1, CCKBR, LPAR6, F2RL1, XCL1, CD24, SGK1	655	573	16650	1.64142	1	0.0519482	0.0481581
GOTERM_BP_FAT	GO:0051098~regulation of binding	23	2.91508	0.00376196	HDAC4, JUN, MEF2C, KDM1A, ANGPT1, GZMA, LEF1, PLCL2, DAB2IP, PDGFB, LIF, TMC8, HMGA2, PTPRF, NFATC4, PPP3CA, DAB2, BAMBI, ID1, LDLRAP1, ZNF268, ZFPM1, CTHRC1	655	300	16650	1.94885	1	0.0522202	0.0484103
GOTERM_BP_FAT	GO:0042472~inner ear morphogenesis	11	1.39417	0.00379213	TBX1, MYO15A, LRIG1, SPRY2, LRIG3, ATP2B2, MYO7A, GATA2, PAX2, TSHR, CTHRC1	655	94	16650	2.97466	1	0.0525274	0.0486951
GOTERM_BP_FAT	GO:0034329~cell junction assembly	17	2.15463	0.00380357	VASP, COL17A1, LAMA5, JUP, PTPRJ, ANK2, THBS1, CLDN1, VEGFA, MMP14, GJB2, PARD3, FSCN1, CD9, ITGA6, PHLDB2, FERMT2	655	192	16650	2.25072	1	0.0525746	0.0487388
GOTERM_BP_FAT	GO:0050954~sensory perception of mechanical stimulus	15	1.90114	0.00381534	GABRB3, TBX1, GABRB2, CDKN1B, ATP2B2, MYO7A, FAM107B, GJB2, MYO1A, MYO15A, LRIG1, OTOF, SPRY2, ATP6V0A4, TECTA	655	158	16650	2.41328	1	0.0526259	0.0487864
GOTERM_BP_FAT	GO:1903115~regulation of actin filament-based movement	7	0.887199	0.00387445	DSP, RYR2, JUP, PDE4D, STC1, ANK2, FGF13	655	39	16650	4.56254	1	0.0533287	0.0494379
GOTERM_BP_FAT	GO:0052547~regulation of peptidase activity	28	3.5488	0.00395012	CSTA, CDKN1B, PCOLCE2, LEF1, FASLG, CST7, THBS1, CASP8, BCL2L11, PERP, CASP1, TNFSF10, NLRP3, RAG1, SNCA, EGLN3, SPINK2, CRIM1, TNFRSF10A, PAX2, VEGFA, MMP14, AIM2, ADORA2A, COL7A1, PPARG, SERPINI1, PI16	655	396	16650	1.79736	1	0.0542561	0.0502976
GOTERM_BP_FAT	GO:0045667~regulation of osteoblast differentiation	12	1.52091	0.00397139	HDAC4, NPPC, MEF2C, RASSF2, PTCH1, ID1, ID3, RORB, TMEM64, IL6R, GLI3, CTHRC1	655	110	16650	2.77307	1	0.0544339	0.0504625
GOTERM_BP_FAT	GO:0051048~negative regulation of secretion	17	2.15463	0.00400126	SRGN, ANXA1, ANGPT1, CD300A, IL1R2, CYP4F2, TNFRSF9, AVPR2, LIF, INHBA, ADRA2B, PPP3CA, F2RL1, NLRP3, IL36RN, SLAMF1, SNCA	655	193	16650	2.23905	1	0.0547286	0.0507357
GOTERM_BP_FAT	GO:0043535~regulation of blood vessel endothelial cell migration	8	1.01394	0.00402003	STARD13, ANGPT1, PDGFB, AMOTL1, PTGS2, THBS1, HDAC9, VEGFA	655	52	16650	3.91075	1	0.0548704	0.0508672
GOTERM_BP_FAT	GO:0097696~STAT cascade	16	2.02788	0.00404929	IL22, CSF2, CD300A, IL26, IL13, LIF, IL31RA, HMGA2, PRL, TNFRSF1A, VEGFA, SOCS1, FLRT2, IL23A, CLCF1, IL6R	655	176	16650	2.3109	1	0.0549259	0.0509186
GOTERM_BP_FAT	GO:0030324~lung development	16	2.02788	0.00404929	FOXA1, LAMA5, CCBE1, EPAS1, SLC23A1, IL13, LIF, HMGA2, GLI3, KLF2, VEGFA, MMP14, RDH10, ALDH1A2, ID1, SPRY2	655	176	16650	2.3109	1	0.0549259	0.0509186
GOTERM_BP_FAT	GO:0032845~negative regulation of homeostatic process	16	2.02788	0.00404929	RYR2, PIF1, CXCL9, TSC22D3, PDE4D, AVPR2, IL13, ITPR1, HTR2B, ANK2, CXCL10, CD19, XCL1, CCR7, NTSR1, SNCA	655	176	16650	2.3109	1	0.0549259	0.0509186
GOTERM_BP_FAT	GO:0061326~renal tubule development	11	1.39417	0.00409326	LAMA5, MEF2C, COL4A1, WT1, PTCH1, LIF, KLHL3, CD24, GLI3, PAX2, VEGFA	655	95	16650	2.94335	1	0.0553915	0.0513502
GOTERM_BP_FAT	GO:0002064~epithelial cell development	18	2.28137	0.00410056	FOXA1, RARG, PDE4D, PDGFB, LIF, STC1, ATP2B2, MYO7A, PAX2, FOSL2, TNFRSF1A, WT1, SIX3, ID1, DACT2, F2RL1, FLNB, S1PR2	655	211	16650	2.16852	1	0.0553915	0.0513502
GOTERM_BP_FAT	GO:0001503~ossification	26	3.29531	0.0041555	HDAC4, LEF1, STC1, RORB, PTGS2, CHRDL1, PHEX, GLI3, NPPC, RASSF2, CREB3L1, ATP6V0A4, IL6R, CTHRC1, SRGN, MEF2C, PTCH1, IGF2, TMEM64, RUNX3, MMP14, MMP13, ID1, MATN1, ID3, BCOR	655	359	16650	1.84099	1	0.0559194	0.0518396
GOTERM_BP_FAT	GO:0048638~regulation of developmental growth	23	2.91508	0.00415675	BMP10, MEF2C, UNC13A, BCL11A, PTCH1, WWC2, HMGA2, NEDD4L, RASAL1, PRL, L1CAM, TSHR, VEGFA, NPPC, CDH4, BCL2L11, WT1, WWC3, PLXNC1, AGRN, FGF13, CGA, PLXNA4	655	303	16650	1.92956	1	0.0559194	0.0518396
GOTERM_BP_FAT	GO:0046058~cAMP metabolic process	14	1.7744	0.00419086	PTGIR, CXCL9, GPR87, PDE4D, AVPR2, PDE4C, ADM, ADCY1, TSHR, CXCL10, ADCYAP1, PDE10A, ADORA2A, PDE8A	655	143	16650	2.48866	1	0.0561472	0.0520508
GOTERM_BP_FAT	GO:0001959~regulation of cytokine-mediated signaling pathway	14	1.7744	0.00419086	ANGPT1, IL1R1, IL1R2, GFI1, NLRC5, TNFRSF1A, CASP8, SOCS1, IRAK2, F2RL1, PPARG, IL36RN, SLIT2, CD24	655	143	16650	2.48866	1	0.0561472	0.0520508
GOTERM_BP_FAT	GO:0007610~behavior	36	4.56274	0.00421124	CHRNA3, CSF2, HTR2B, DBH, RETN, ADCY1, PTGS2, THBS1, SLC8A2, AFF2, EPS8, PREX2, NETO1, MDK, SIX3, NTSR1, SNCA, TBX1, JUN, MEF2C, ZFHX2, LSAMP, KCNAB1, ATP2B2, ETV5, TSHR, SDK1, ADCYAP1, OLFM2, PER3, ADORA2A, GLRB, CCKBR, MYO15A, FGF13, SGK1	655	557	16650	1.64293	1	0.0563049	0.052197
GOTERM_BP_FAT	GO:0010533~regulation of activation of Janus kinase activity	4	0.506971	0.00424302	SOCS1, CD300A, IL23A, IL6R	655	9	16650	11.2977	1	0.056614	0.0524835
GOTERM_BP_FAT	GO:0032846~positive regulation of homeostatic process	18	2.28137	0.00430055	RYR2, HLA-DRB5, CXCL9, ANXA1, KDM1A, IL13, INHBA, TMEM64, GATA2, PTGS2, CXCL10, ADORA2A, CD19, XCL1, PRKCQ, MAP3K4, NTSR1, SNCA	655	212	16650	2.15829	1	0.0572648	0.0530868
GOTERM_BP_FAT	GO:0045621~positive regulation of lymphocyte differentiation	10	1.26743	0.00441772	MMP14, IL1RL2, ANXA1, IL36B, IL23A, MYB, NLRP3, AP3B1, GLI3, RAG1	655	81	16650	3.13825	1	0.0587054	0.0544224
GOTERM_BP_FAT	GO:0032103~positive regulation of response to external stimulus	21	2.6616	0.00446177	CXCL9, CCL3L1, CCL4L2, PDGFB, PLG, CXCL3, PTGS2, THBS1, TNFRSF1A, VEGFA, CXCL10, IL23A, C3AR1, TLR9, XCL2, F2RL1, XCL1, CCR7, SLIT2, KLKB1, IL6R	655	267	16650	1.99931	1	0.0591705	0.0548535
GOTERM_BP_FAT	GO:0060079~excitatory postsynaptic potential	8	1.01394	0.0044784	STX1B, PPP3CA, MEF2C, CHRNA3, ADORA2A, NETO1, S1PR2, SNCA	655	53	16650	3.83696	1	0.0592708	0.0549466
GOTERM_BP_FAT	GO:0048839~inner ear development	16	2.02788	0.00449812	GABRB3, TBX1, GABRB2, CDKN1B, ATP2B2, MYO7A, GATA2, GLI3, PAX2, TSHR, MYO15A, MAPKAPK2, LRIG1, SPRY2, LRIG3, CTHRC1	655	178	16650	2.28493	1	0.0594116	0.055077
GOTERM_BP_FAT	GO:0061041~regulation of wound healing	13	1.64766	0.00455367	ANXA1, KRT1, FAM46A, PLEK, PDGFB, PLG, THBS1, SELP, PLAU, F2RL1, PRKCQ, KLKB1, PHLDB2	655	128	16650	2.5817	1	0.0599032	0.0555328
GOTERM_BP_FAT	GO:2001056~positive regulation of cysteine-type endopeptidase activity	13	1.64766	0.00455367	EGLN3, CDKN1B, FASLG, TNFRSF10A, BCL2L11, AIM2, CASP8, PERP, CASP1, TNFSF10, NLRP3, PPARG, SNCA	655	128	16650	2.5817	1	0.0599032	0.0555328
GOTERM_BP_FAT	GO:0003416~endochondral bone growth	5	0.633714	0.00464807	NPPC, RARG, MMP13, MATN1, STC1	655	18	16650	7.06107	1	0.0610223	0.0565702
GOTERM_BP_FAT	GO:0032649~regulation of interferon-gamma production	11	1.39417	0.00475203	HLA-DRB5, IL23A, PDE4D, EBI3, TLR9, XCL1, CCR7, IL36RN, INHBA, ZFPM1, SLAMF1	655	97	16650	2.88266	1	0.0622621	0.0577196
GOTERM_BP_FAT	GO:0051253~negative regulation of RNA metabolic process	68	8.6185	0.0047639	FOXA1, RARG, CDKN1B, KDM1A, GFI1, WWC2, NRARP, FASLG, IKZF1, RORB, GLI3, IKZF4, PPP3CA, ZIC2, SIX3, MYB, WWC3, JARID2, EOMES, HES6, MEF2C, TLE1, TSC22D3, ZBTB32, ARID5B, CBFA2T3, RUNX3, PAX2, ETV6, ZEB2, TXNIP, HOXB3, XCL1, PPARG, ZFPM1, ATF3, HDAC4, MAGEL2, SATB1, LEF1, PDGFB, NEDD4L, GATA2, HDAC9, FOXO1, PURB, PCBP3, MXI1, TBL1Y, ZNF268, SNCA, PLK3, JUN, BCL11A, PTCH1, DAB2IP, HMGA2, ESR2, NFAT…	655	1240	16650	1.39399	1	0.0622928	0.057748
GOTERM_BP_FAT	GO:0002761~regulation of myeloid leukocyte differentiation	12	1.52091	0.00487518	JUN, CASP8, RASSF2, IL23A, ZBTB46, LEF1, LIF, TMEM64, INHBA, GATA2, TRIB1, ZFPM1	655	113	16650	2.69945	1	0.0636206	0.058979
GOTERM_BP_FAT	GO:0030323~respiratory tube development	16	2.02788	0.00498662	FOXA1, LAMA5, CCBE1, EPAS1, SLC23A1, IL13, LIF, HMGA2, GLI3, KLF2, VEGFA, MMP14, RDH10, ALDH1A2, ID1, SPRY2	655	180	16650	2.25954	1	0.0645978	0.0598849
GOTERM_BP_FAT	GO:2000516~positive regulation of CD4-positive, alpha-beta T cell activation	6	0.760456	0.00499619	ANXA1, IL23A, MYB, NLRP3, XCL1, PRKCQ	655	29	16650	5.25928	1	0.0645978	0.0598849
GOTERM_BP_FAT	GO:0045058~T cell selection	7	0.887199	0.0049978	SPN, IL23A, CCR7, ZFPM1, LY9, GLI3, BATF	655	41	16650	4.33997	1	0.0645978	0.0598849
GOTERM_BP_FAT	GO:0042088~T-helper 1 type immune response	7	0.887199	0.0049978	HLA-DRB5, ANXA1, IL23A, EBI3, LEF1, XCL1, SLAMF1	655	41	16650	4.33997	1	0.0645978	0.0598849
GOTERM_BP_FAT	GO:0048812~neuron projection morphogenesis	35	4.43599	0.005022	BRSK1, SPTBN5, KDM1A, RAPH1, NEDD4L, RASAL1, ADCY1, GLI3, PREX2, PPP3CA, CDH4, FLRT2, GPC1, SLIT1, SLIT2, PLXNC1, PLXNA4, VASP, UNC13A, BCL11A, DAB2IP, L1CAM, PAX2, NFATC4, VEGFA, EFNA3, EFNA2, ADORA2A, PARD3, ID1, TLR9, PLXNB2, PRKCQ, FGF13, SGK1	655	543	16650	1.63848	1	0.0645978	0.0598849
GOTERM_BP_FAT	GO:0010595~positive regulation of endothelial cell migration	9	1.14068	0.0050291	CCBE1, ANGPT1, PDGFB, AMOTL1, PTGS2, THBS1, HDAC9, RHOB, VEGFA	655	68	16650	3.36439	1	0.0645978	0.0598849
GOTERM_BP_FAT	GO:0030279~negative regulation of ossification	9	1.14068	0.0050291	SRGN, HDAC4, MEF2C, PTCH1, ID1, ID3, BCOR, RORB, TMEM64	655	68	16650	3.36439	1	0.0645978	0.0598849
GOTERM_BP_FAT	GO:0015837~amine transport	9	1.14068	0.0050291	RAB3B, CHRNA3, SLC32A1, ADORA2A, CHRNA6, SLC38A3, ADRA2B, NTSR1, SNCA	655	68	16650	3.36439	1	0.0645978	0.0598849
GOTERM_BP_FAT	GO:0042102~positive regulation of T cell proliferation	11	1.39417	0.00511123	SPN, TMIGD2, ANXA1, IL23A, EBI3, IGF2, XCL1, PRKCQ, CD24, ZP4, SLAMF1	655	98	16650	2.85325	1	0.0655239	0.0607434
GOTERM_BP_FAT	GO:1903034~regulation of response to wounding	14	1.7744	0.00528899	ANXA1, KRT1, FAM46A, PLEK, PDGFB, PLG, THBS1, PTPRF, SELP, PLAU, F2RL1, PRKCQ, KLKB1, PHLDB2	655	147	16650	2.42094	1	0.0676701	0.062733
GOTERM_BP_FAT	GO:0050731~positive regulation of peptidyl-tyrosine phosphorylation	15	1.90114	0.00531028	CSF2, ANGPT1, IL13, PDGFB, LIF, IL31RA, IGF2, ADRA2B, TNFRSF1A, VEGFA, EHD4, IL23A, CLCF1, CD24, IL6R	655	164	16650	2.32499	1	0.0678097	0.0628625
GOTERM_BP_FAT	GO:0060402~calcium ion transport into cytosol	13	1.64766	0.00547845	RYR2, CXCL9, PDE4D, IL13, ITPR1, HTR2B, ANK2, CXCL10, CD19, XCL1, CCR7, NTSR1, SNCA	655	131	16650	2.52258	1	0.0696633	0.0645808
GOTERM_BP_FAT	GO:0003008~system process	102	12.9278	0.00548462	RORB, SLC8A2, FAM107B, NPPC, C3AR1, TECTA, CCBE1, MEF2C, CCDC78, ANK2, MYO7A, ATP1B1, MYL4, ADCYAP1, OLFM2, PARD3, SCNN1A, CHRNA3, EPAS1, PDGFB, ITPR1, NEDD4L, STC1, SLC1A4, CACNA1I, RDH10, OTOF, KCNMB4, ATP6V0A4, CGA, NTSR1, JUN, JUP, EPHX2, MCAM, CYP4F2, INHBA, CYP4F12, CXCL10, GJB2, SLC6A8, FGF13, GABRB3, GABRB2, MYOM1, RYR2, DOCK5, BMP10, CDKN1B, RDH8, TENM4, HTR2B, DYSF, ADM, PTPRJ, ATP2A1, …	655	2014	16650	1.2874	1	0.0696633	0.0645808
GOTERM_BP_FAT	GO:0045582~positive regulation of T cell differentiation	9	1.14068	0.00549805	IL1RL2, ANXA1, IL36B, IL23A, MYB, NLRP3, AP3B1, GLI3, RAG1	655	69	16650	3.31563	1	0.0696633	0.0645808
GOTERM_BP_FAT	GO:1903779~regulation of cardiac conduction	9	1.14068	0.00549805	NPPC, RYR2, PDE4D, ITPR1, ATP2A1, ATP2B2, ANK2, ATP1B1, SLC8A2	655	69	16650	3.31563	1	0.0696633	0.0645808
GOTERM_BP_FAT	GO:0042476~odontogenesis	12	1.52091	0.00556314	TBX1, LAMA5, BCL2L11, PERP, LEF1, ID3, ADM, ITGA6, BCOR, INHBA, GLI3, FOXO1	655	115	16650	2.65251	1	0.0703516	0.0652189
GOTERM_BP_FAT	GO:0043588~skin development	19	2.40811	0.00562744	DSP, LAMA5, CSTA, ANXA1, JUP, KRT1, TCHH, KAZN, INHBA, HOXC13, CLDN1, KRT9, FOSL2, KRT17, COL5A3, DACT2, TXNIP, ITGA6, FLNB	655	236	16650	2.04651	1	0.0709057	0.0657326
GOTERM_BP_FAT	GO:0043281~regulation of cysteine-type endopeptidase activity involved in apoptotic process	17	2.15463	0.00563367	EGLN3, CDKN1B, LEF1, FASLG, TNFRSF10A, THBS1, PAX2, VEGFA, BCL2L11, CASP8, ADORA2A, CASP1, TNFSF10, NLRP3, PPARG, RAG1, SNCA	655	200	16650	2.16069	1	0.0709057	0.0657326
GOTERM_BP_FAT	GO:0006775~fat-soluble vitamin metabolic process	7	0.887199	0.00564132	GFI1, CYP4F2, ALDH1A2, LRP2, CYP4F11, PLTP, CYP4F12	655	42	16650	4.23664	1	0.0709057	0.0657326
GOTERM_BP_FAT	GO:0006873~cellular ion homeostasis	37	4.68948	0.00565034	RYR2, CXCL9, HTR2B, ITPR1, NEDD4L, CXCR4, STC1, ADM, FASLG, ATP2A1, LPAR4, GATA2, SLC8A2, CD19, FTH1, C3AR1, CCR7, ATP6V0A4, NTSR1, SNCA, PTGIR, EPHX2, PDE4D, IL13, ANK2, ATP2B2, TMEM64, ATP1B1, SLC9A2, CXCL10, ADCYAP1, CCKBR, LPAR6, F2RL1, XCL1, CD24, SGK1	655	588	16650	1.59955	1	0.0709057	0.0657326
GOTERM_BP_FAT	GO:0043302~positive regulation of leukocyte degranulation	5	0.633714	0.00570713	FGR, IL13, F2RL1, GAB2, GATA2	655	19	16650	6.68943	1	0.0713446	0.0661394
GOTERM_BP_FAT	GO:0002888~positive regulation of myeloid leukocyte mediated immunity	5	0.633714	0.00570713	FGR, IL13, F2RL1, GAB2, GATA2	655	19	16650	6.68943	1	0.0713446	0.0661394
GOTERM_BP_FAT	GO:0007423~sensory organ development	33	4.18251	0.00572325	GABRB3, GABRB2, RARG, CDKN1B, LEF1, FASLG, RORB, HOXC13, GATA2, CHRDL1, GLI3, BCL2L11, RDH10, SIX3, LRIG1, LRIG3, CTHRC1, TBX1, JUN, ATP2B2, MYO7A, INHBA, PAX2, TSHR, VEGFA, SDK1, COL4A1, WT1, MYO15A, ALDH1A2, NINJ1, MAPKAPK2, SPRY2	655	507	16650	1.65455	1	0.0714096	0.0661997
GOTERM_BP_FAT	GO:0006766~vitamin metabolic process	13	1.64766	0.00581786	AMN, SLC23A1, GFI1, CYP4F2, SLC2A3, LRP2, CYP4F11, PTGS2, CYP4F12, ALDH1A2, CTRC, PLTP, SLC19A2	655	132	16650	2.50347	1	0.0724518	0.0671658
GOTERM_BP_FAT	GO:0007162~negative regulation of cell adhesion	18	2.28137	0.00587245	HLA-DRB5, ANXA1, ANGPT1, CD300A, LEF1, DTX1, NRARP, PLG, THBS1, GLI3, SPN, MMP14, ADORA2A, DACT2, PLXNB2, XCL1, PHLDB2, PAG1	655	219	16650	2.0893	1	0.0729925	0.0676671
GOTERM_BP_FAT	GO:1904064~positive regulation of cation transmembrane transport	11	1.39417	0.00589323	RYR2, CXCL10, CXCL9, CD19, IL13, XCL1, AKAP7, ANK2, ATP1B1, NTSR1, SNCA	655	100	16650	2.79618	1	0.0731118	0.0677777
GOTERM_BP_FAT	GO:0002285~lymphocyte activation involved in immune response	14	1.7744	0.00591852	EOMES, ANXA1, LEF1, PLCL2, RORC, CD1C, LY9, BATF, IL23A, CLCF1, MYB, F2RL1, NLRP3, ZFPM1	655	149	16650	2.38844	1	0.0732865	0.0679397
GOTERM_BP_FAT	GO:0021675~nerve development	9	1.14068	0.00599961	GABRB3, TBX1, GABRB2, UNC13A, LRIG1, HOXB3, GLI3, PLXNA4, PAX2	655	70	16650	3.26827	1	0.0741501	0.0687403
GOTERM_BP_FAT	GO:0030029~actin filament-based process	41	5.19645	0.00604656	RYR2, SPTBN5, MAGEL2, BMP10, PLEK, C15ORF62, ARHGAP18, NEDD4L, STC1, PPM1E, EPS8, EPB41L4B, FGD4, FGD5, PLS3, RAC3, FLNB, CCR7, SLIT2, S1PR2, SPECC1, DSP, VASP, MEF2C, ANXA1, JUP, PDE4D, RHOG, MICAL2, ANK2, MYO7A, CORO2A, SSH3, MYL4, ID1, FSCN1, SPIRE1, F2RL1, RHOU, FGF13, PHLDB2	655	672	16650	1.55091	1	0.0745894	0.0691475
GOTERM_BP_FAT	GO:0060401~cytosolic calcium ion transport	13	1.64766	0.00617374	RYR2, CXCL9, PDE4D, IL13, ITPR1, HTR2B, ANK2, CXCL10, CD19, XCL1, CCR7, NTSR1, SNCA	655	133	16650	2.48465	1	0.0760149	0.070469
GOTERM_BP_FAT	GO:0007507~heart development	33	4.18251	0.00631774	RYR2, BMP10, TENM4, HTR2B, PDGFB, ADM, LRP2, GATA2, HDAC9, FGFRL1, GLI3, FLRT2, MYO18B, SOX4, EOMES, DSP, TBX1, JUN, MEF2C, PTCH1, MICAL2, KCNAB1, ANK2, NFATC4, VEGFA, WT1, ALDH1A2, ID1, ARMC4, ID3, PPARG, BCOR, ZFPM1	655	511	16650	1.64159	1	0.0776417	0.0719771
GOTERM_BP_FAT	GO:0010605~negative regulation of macromolecule metabolic process	115	14.5754	0.00640162	FOXA1, KDM1A, GFI1, WWC2, IKZF1, RORB, IKZF4, NPPC, RASSF2, RGS3, MYB, WWC3, GRB10, CHAC1, IL6R, SOX4, RAG1, EOMES, HES6, SPINK2, MEF2C, TLE1, CD300A, IL1R2, ZBTB32, ARID5B, RUNX3, PARD3, TXNIP, HOXB3, TRIB1, TRIB2, ZFPM1, ATF3, PIF1, MAGEL2, PDGFB, NEDD4L, GATA2, FBXO43, FOXO1, UBE2J1, SOCS1, PCBP3, FLRT2, ZNF268, PLK3, JUN, BCL11A, GADD45A, PTCH1, CRIM1, LIF, HMGA2, INHBA, ESR2, NFATC4, DAB2, I…	655	2326	16650	1.25679	1	0.0785249	0.0727959
GOTERM_BP_FAT	GO:0050920~regulation of chemotaxis	16	2.02788	0.00671546	CXCL9, PDGFB, CXCR4, CXCL3, THBS1, VEGFA, CXCL10, IL23A, C3AR1, F2RL1, XCL1, CCR7, SLIT2, PLXNC1, IL6R, PLXNA4	655	186	16650	2.18665	1	0.0822203	0.0762217
GOTERM_BP_FAT	GO:0030111~regulation of Wnt signaling pathway	23	2.91508	0.00686239	TLE1, JUP, LEF1, DAB2IP, HMGA2, NRARP, CMAHP, TMEM64, CXXC4, FOXO1, GLI3, NFATC4, DAB2, CDH2, BAMBI, SIX3, DACT2, GRB10, DACT3, NOTUM, CDK14, SOX4, CTHRC1	655	316	16650	1.85018	1	0.083858	0.0777399
GOTERM_BP_FAT	GO:0032870~cellular response to hormone stimulus	38	4.81622	0.00687487	HDAC4, FOXA1, RNASEL, RARG, LEF1, RORC, STC1, RORB, ADCY1, PRL, SLC2A4, HDAC9, FOXO1, REPIN1, SOCS1, GRB10, ATP6V0A4, SLIT2, CGA, JUN, PTGIR, MEF2C, ANXA1, AVPR2, IGF2, HMGA2, INHBA, GNG12, SSTR3, TSHR, ESR2, ADCYAP1, DAB2, WT1, KLF9, PRKCQ, PPARG, CPEB2	655	616	16650	1.56811	1	0.083858	0.0777399
GOTERM_BP_FAT	GO:0010975~regulation of neuron projection development	28	3.5488	0.00688825	CHRNA3, KDM1A, GFI1, NEDD4L, RASAL1, PTPRF, PPP3CA, CDH4, NCS1, SLIT1, SLIT2, PLXNC1, PLXNA4, MEF2C, UNC13A, BCL11A, DAB2IP, L1CAM, SSH3, NFATC4, VEGFA, SDK1, STX1B, ADCYAP1, ID1, UST, PLXNB2, FGF13	655	413	16650	1.72338	1	0.0838648	0.0777461
GOTERM_BP_FAT	GO:0098868~bone growth	5	0.633714	0.00691561	NPPC, RARG, MMP13, MATN1, STC1	655	20	16650	6.35496	1	0.0840414	0.0779099
GOTERM_BP_FAT	GO:0050880~regulation of blood vessel size	13	1.64766	0.00693706	DOCK5, EPHX2, AVPR2, HTR2B, ADM, DBH, PTGS2, ADRA2B, NPPC, ADCYAP1, ADORA2A, F2RL1, KCNMB4	655	135	16650	2.44784	1	0.0841457	0.0780066
GOTERM_BP_FAT	GO:1903524~positive regulation of blood circulation	10	1.26743	0.00706427	NPPC, ADCYAP1, RYR2, EPHX2, PDE4D, AVPR2, F2RL1, ADM, DBH, PTGS2	655	87	16650	2.92182	1	0.08553	0.0792899
GOTERM_BP_FAT	GO:1900542~regulation of purine nucleotide metabolic process	17	2.15463	0.00710174	HDAC4, PTGIR, CXCL9, GPR87, PDE4D, AVPR2, ADM, ADCY1, THBS1, CBFA2T3, TSHR, VEGFA, CXCL10, NPPC, ADCYAP1, ADORA2A, SNCA	655	205	16650	2.10799	1	0.0856663	0.0794163
GOTERM_BP_FAT	GO:0060560~developmental growth involved in morphogenesis	17	2.15463	0.00710174	RARG, UNC13A, KDM1A, BCL11A, RAPH1, NEDD4L, RASAL1, L1CAM, VEGFA, CDH4, RDH10, SLIT1, SPRY2, SLIT2, PLXNC1, FGF13, PLXNA4	655	205	16650	2.10799	1	0.0856663	0.0794163
GOTERM_BP_FAT	GO:0070661~leukocyte proliferation	21	2.6616	0.00729066	MEF2C, HLA-DRB5, ANXA1, SATB1, CD300A, EBI3, LEF1, IL13, PLCL2, IGF2, SPN, CCND3, TMIGD2, IL23A, CLCF1, F2RL1, XCL1, PRKCQ, CD24, ZP4, SLAMF1	655	280	16650	1.90649	1	0.0877833	0.0813788
GOTERM_BP_FAT	GO:0035150~regulation of tube size	13	1.64766	0.00734562	DOCK5, EPHX2, AVPR2, HTR2B, ADM, DBH, PTGS2, ADRA2B, NPPC, ADCYAP1, ADORA2A, F2RL1, KCNMB4	655	136	16650	2.42984	1	0.0882636	0.081824
GOTERM_BP_FAT	GO:0016049~cell growth	29	3.67554	0.00735755	RARG, BMP10, CDKN1B, KDM1A, LEF1, RAPH1, NEDD4L, PTPRJ, RASAL1, CDH4, SLIT1, DACT3, SLIT2, PLXNC1, PLXNA4, CDKN2C, UNC13A, BCL11A, OSGIN1, INHBA, L1CAM, ESR2, VEGFA, MMP14, PSRC1, KRT17, WT1, PPARG, FGF13	655	436	16650	1.69077	1	0.0882636	0.081824
GOTERM_BP_FAT	GO:0045596~negative regulation of cell differentiation	39	4.94297	0.00738606	HDAC4, FOXA1, RARG, KDM1A, ZBTB46, GFI1, PDGFB, DTX1, NRARP, RORB, GATA2, FOXO1, GLI3, NPPC, PPP3CA, SIX3, RBPMS2, DACT3, SLIT2, TBX1, ANXA1, BCL11A, PTCH1, IL13, DAB2IP, HMGA2, INHBA, TMEM64, NFATC4, CXCL10, STX1B, ADCYAP1, ID1, ID3, PPARG, FGF13, TRIB1, TRIB2, ZFPM1	655	640	16650	1.54902	1	0.0884433	0.0819906
GOTERM_BP_FAT	GO:1901699~cellular response to nitrogen compound	35	4.43599	0.00751627	GABRB3, GABRB2, RYR2, RNASEL, KDM1A, AKAP7, STC1, ADCY1, PRL, SLC2A4, PTGS2, HDAC9, FOXO1, REPIN1, PPP3CA, SOCS1, PDGFC, GRB10, ATP6V0A4, SLIT2, SNCA, MEF2C, JUP, PDE4D, IGF2, GNG12, KLF3, KLF2, COL4A1, WT1, ID1, PRKCQ, PPARG, AGRN, CPEB2	655	558	16650	1.59443	1	0.089838	0.0832836
GOTERM_BP_FAT	GO:0010522~regulation of calcium ion transport into cytosol	10	1.26743	0.00760321	RYR2, CXCL10, CXCL9, CD19, PDE4D, IL13, XCL1, ANK2, NTSR1, SNCA	655	88	16650	2.88862	1	0.0906926	0.0840758
GOTERM_BP_FAT	GO:1903531~negative regulation of secretion by cell	15	1.90114	0.00761551	SRGN, ANXA1, ANGPT1, CD300A, IL1R2, TNFRSF9, LIF, INHBA, ADRA2B, PPP3CA, F2RL1, NLRP3, IL36RN, SLAMF1, SNCA	655	171	16650	2.22981	1	0.0906926	0.0840758
GOTERM_BP_FAT	GO:0043114~regulation of vascular permeability	6	0.760456	0.00769206	ADORA2A, ANGPT1, PTPRJ, ADM, SLIT2, VEGFA	655	32	16650	4.76622	1	0.0912716	0.0846126
GOTERM_BP_FAT	GO:0045687~positive regulation of glial cell differentiation	6	0.760456	0.00769206	TENM4, BIN1, CLCF1, LIF, CXCR4, PPARG	655	32	16650	4.76622	1	0.0912716	0.0846126
GOTERM_BP_FAT	GO:0030799~regulation of cyclic nucleotide metabolic process	14	1.7744	0.00775578	PTGIR, CXCL9, GPR87, PDE4D, AVPR2, ADM, ADCY1, THBS1, TSHR, VEGFA, CXCL10, NPPC, ADCYAP1, ADORA2A	655	154	16650	2.3109	1	0.091861	0.085159
GOTERM_BP_FAT	GO:0051100~negative regulation of binding	13	1.64766	0.00777284	JUN, KDM1A, GZMA, LEF1, PDGFB, TMC8, HMGA2, PTPRF, NFATC4, PPP3CA, DAB2, ID1, ZFPM1	655	137	16650	2.4121	1	0.0918966	0.085192
GOTERM_BP_FAT	GO:0071356~cellular response to tumor necrosis factor	19	2.40811	0.00780461	HDAC4, CCL22, CCL3L1, CCL20, TNFRSF9, CCL4L2, DAB2IP, FASLG, TNFRSF10A, SLC2A4, THBS1, KLF2, TNFRSF10D, TNFRSF1A, AIM2, XCL2, F2RL1, XCL1, ZNF268	655	244	16650	1.97941	1	0.0921057	0.0853859
GOTERM_BP_FAT	GO:0001956~positive regulation of neurotransmitter secretion	4	0.506971	0.00785896	STX1B, UNC13A, ADORA2A, SNCA	655	11	16650	9.24358	1	0.0924134	0.0856711
GOTERM_BP_FAT	GO:0060099~regulation of phagocytosis, engulfment	4	0.506971	0.00785896	CD300A, F2RL1, PPARG, GATA2	655	11	16650	9.24358	1	0.0924134	0.0856711
GOTERM_BP_FAT	GO:0046651~lymphocyte proliferation	20	2.53485	0.00792267	MEF2C, HLA-DRB5, ANXA1, SATB1, CD300A, EBI3, LEF1, IL13, PLCL2, IGF2, SPN, CCND3, TMIGD2, IL23A, CLCF1, XCL1, PRKCQ, CD24, ZP4, SLAMF1	655	263	16650	1.93307	1	0.0927982	0.0860278
GOTERM_BP_FAT	GO:0042503~tyrosine phosphorylation of Stat3 protein	7	0.887199	0.00793426	SOCS1, IL23A, CLCF1, IL31RA, LIF, IL6R, VEGFA	655	45	16650	3.9542	1	0.0927982	0.0860278
GOTERM_BP_FAT	GO:0042516~regulation of tyrosine phosphorylation of Stat3 protein	7	0.887199	0.00793426	SOCS1, IL23A, CLCF1, IL31RA, LIF, IL6R, VEGFA	655	45	16650	3.9542	1	0.0927982	0.0860278
GOTERM_BP_FAT	GO:0006066~alcohol metabolic process	21	2.6616	0.00796534	FDPS, NUS1, ACSS2, RDH8, GFI1, PLEK, SORD, APOBR, DBH, SGPP2, NUDT11, INPP5A, ALDH2, RDH10, ALDH1A2, PLCH1, LDLRAP1, APOL1, PLCB2, NTSR1, SNCA	655	282	16650	1.89297	1	0.0929953	0.0862106
GOTERM_BP_FAT	GO:0050868~negative regulation of T cell activation	10	1.26743	0.00817295	SPN, HLA-DRB5, ANXA1, ADORA2A, CD300A, DTX1, XCL1, NRARP, PAG1, GLI3	655	89	16650	2.85616	1	0.0951112	0.088172
GOTERM_BP_FAT	GO:0060047~heart contraction	19	2.40811	0.00819849	DSP, HDAC4, RYR2, BMP10, JUP, EPAS1, PDE4D, ITPR1, STC1, NEDD4L, ADM, ATP2A1, ATP2B2, ANK2, ATP1B1, SLC8A2, MYL4, NPPC, FGF13	655	245	16650	1.97134	1	0.0951112	0.088172
GOTERM_BP_FAT	GO:1901342~regulation of vasculature development	19	2.40811	0.00819849	CCBE1, STARD13, KRT1, DAB2IP, PDGFB, FASLG, ADM, GATA2, PTGS2, HDAC9, THBS1, RHOB, VEGFA, CXCL10, TMIGD2, WT1, ID1, STAB1, C3AR1	655	245	16650	1.97134	1	0.0951112	0.088172
GOTERM_BP_FAT	GO:0035265~organ growth	13	1.64766	0.0082193	BMP10, MEF2C, RARG, TENM4, WWC2, STC1, NPPC, MMP13, WT1, WWC3, MATN1, SPRY2, CGA	655	138	16650	2.39462	1	0.0951112	0.088172
GOTERM_BP_FAT	GO:0072006~nephron development	13	1.64766	0.0082193	LAMA5, MEF2C, ANGPT1, PTCH1, PDGFB, LIF, KLHL3, NID1, GLI3, PAX2, VEGFA, WT1, CD24	655	138	16650	2.39462	1	0.0951112	0.088172
GOTERM_BP_FAT	GO:0060351~cartilage development involved in endochondral bone morphogenesis	5	0.633714	0.00828178	NPPC, RARG, MMP13, MATN1, STC1	655	21	16650	6.05234	1	0.0956649	0.0886853
GOTERM_BP_FAT	GO:0048661~positive regulation of smooth muscle cell proliferation	9	1.14068	0.00836013	HDAC4, JUN, IL13, PDGFB, RBPMS2, RETN, PTGS2, THBS1, IL6R	655	74	16650	3.0916	1	0.0962299	0.0892091
GOTERM_BP_FAT	GO:0002673~regulation of acute inflammatory response	9	1.14068	0.00836013	SPN, ADCYAP1, SUSD4, C3AR1, NLRP3, CCR7, PPARG, PTGS2, KLKB1	655	74	16650	3.0916	1	0.0962299	0.0892091
GOTERM_BP_FAT	GO:0030162~regulation of proteolysis	42	5.32319	0.00841017	CSTA, CDKN1B, PCOLCE2, LEF1, FASLG, CST7, THBS1, CASP8, BCL2L11, PERP, CASP1, C3AR1, SUSD4, TNFSF10, NLRP3, CHAC1, RAG1, SNCA, CCBE1, PLK3, EGLN3, SPINK2, IL1R2, DAB2IP, CRIM1, TNFRSF10A, CBFA2T3, PAX2, VEGFA, DAB2, MMP14, AIM2, ADORA2A, ASTL, COL7A1, PPARG, SERPINI1, PI16, TRIB1, TRIB2, KLKB1, PTPN3	655	708	16650	1.50796	1	0.0966357	0.0895853
GOTERM_BP_FAT	GO:0032943~mononuclear cell proliferation	20	2.53485	0.00855351	MEF2C, HLA-DRB5, ANXA1, SATB1, CD300A, EBI3, LEF1, IL13, PLCL2, IGF2, SPN, CCND3, TMIGD2, IL23A, CLCF1, XCL1, PRKCQ, CD24, ZP4, SLAMF1	655	265	16650	1.91848	1	0.0981102	0.0909523
GOTERM_BP_FAT	GO:0042692~muscle cell differentiation	25	3.16857	0.00870612	HDAC4, BMP10, CXCL9, KDM1A, EPAS1, LEF1, PDGFB, ADM, HDAC9, PPP3CA, CDH2, MYO18B, RBPMS2, TBX1, MEF2C, KCNAB1, ANK2, NFATC4, VEGFA, CXCL10, OLFM2, MMP14, WT1, BIN1, ID3	655	362	16650	1.75551	1	0.0996858	0.0924129
GOTERM_BP_FAT	GO:0048840~otolith development	3	0.380228	0.00876796	LRIG1, LRIG3, ATP2B2	655	4	16650	19.0649	1	0.0998212	0.0925385
GOTERM_BP_FAT	GO:0042360~vitamin E metabolic process	3	0.380228	0.00876796	CYP4F2, PLTP, CYP4F12	655	4	16650	19.0649	1	0.0998212	0.0925385
GOTERM_BP_FAT	GO:0001892~embryonic placenta development	10	1.26743	0.00877458	EOMES, CASP8, CSF2, EPAS1, LEF1, PDGFB, LIF, ADM, PCDH12, GATA2	655	90	16650	2.82443	1	0.0998212	0.0925385
GOTERM_BP_FAT	GO:0035329~hippo signaling	6	0.760456	0.00877902	TEAD4, WWC2, WWC3, AMOTL2, AMOTL1, TEAD1	655	33	16650	4.62179	1	0.0998212	0.0925385
GOTERM_BP_FAT	GO:0032675~regulation of interleukin-6 production	11	1.39417	0.00880746	ADCYAP1, IL1RL2, IL36B, MAPKAPK2, TLR9, F2RL1, IL36RN, RAB7B, IL6R, KLF2, SLAMF1	655	106	16650	2.63791	1	0.0998684	0.0925822
GOTERM_BP_FAT	GO:0098900~regulation of action potential	7	0.887199	0.00882899	DSP, RYR2, JUP, ANK2, FGF13, NTSR1, PTPN3	655	46	16650	3.86824	1	0.0998684	0.0925822
GOTERM_BP_FAT	GO:0046847~filopodium assembly	7	0.887199	0.00882899	FGD4, FGD5, FSCN1, CCR7, ITGA6, S1PR2, AGRN	655	46	16650	3.86824	1	0.0998684	0.0925822
GOTERM_BP_FAT	GO:0051952~regulation of amine transport	8	1.01394	0.00887056	RAB3B, CHRNA3, ADORA2A, CHRNA6, SLC38A3, ADRA2B, NTSR1, SNCA	655	60	16650	3.38931	1	0.100165	0.0928574
GOTERM_BP_FAT	GO:0007160~cell-matrix adhesion	16	2.02788	0.00889526	COL17A1, LAMA5, PTPRJ, NID1, THBS1, VEGFA, MMP14, BCL2L11, PLAU, COL5A3, NINJ1, ITGA6, CCR7, PHLDB2, FERMT2, TECTA	655	192	16650	2.11832	1	0.100271	0.0929555
GOTERM_BP_FAT	GO:0007010~cytoskeleton organization	62	7.85805	0.00892661	BMP10, CDKN1B, MAST4, PLEK, C15ORF62, EPS8, EPB41L4B, CAPN6, PLS3, RAC3, CCR7, DSP, MEF2C, ANXA1, RHOG, ANK2, NAV1, MID1, KRT9, TUBB2A, PSRC1, MAP7D2, ARMC4, FSCN1, RHOU, KIF20A, INA, PHLDB2, LAMA5, BRSK1, SPTBN5, MAGEL2, TUBAL3, ARHGAP18, PPM1E, CAMSAP2, FGD4, FGD5, STRIP2, MAP7, PAK6, FLNB, SLIT2, S1PR2, SNCA, SPECC1, VASP, PLK3, JUP, GADD45A, MICAL2, CORO2A, SSH3, CAMSAP3, KRT17, ID1, SPAG1, S…	655	1144	16650	1.37765	1	0.100451	0.0931225
GOTERM_BP_FAT	GO:0003015~heart process	19	2.40811	0.00915533	DSP, HDAC4, RYR2, BMP10, JUP, EPAS1, PDE4D, ITPR1, STC1, NEDD4L, ADM, ATP2A1, ATP2B2, ANK2, ATP1B1, SLC8A2, MYL4, NPPC, FGF13	655	248	16650	1.94749	1	0.102848	0.0953444
GOTERM_BP_FAT	GO:0045619~regulation of lymphocyte differentiation	13	1.64766	0.00917223	ANXA1, DTX1, NRARP, AP3B1, INHBA, GLI3, MMP14, IL1RL2, IL36B, IL23A, MYB, NLRP3, RAG1	655	140	16650	2.36041	1	0.102861	0.0953565
GOTERM_BP_FAT	GO:0048562~embryonic organ morphogenesis	21	2.6616	0.0092123	TBX1, RYR2, MEF2C, RARG, MICAL2, ATP2B2, MYO7A, GATA2, GLI3, PAX2, TSHR, MMP14, MYO15A, RDH10, SIX3, LRIG1, RBPMS2, SPRY2, HOXB3, LRIG3, CTHRC1	655	286	16650	1.86649	1	0.103134	0.0956092
GOTERM_BP_FAT	GO:1902580~single-organism cellular localization	60	7.60456	0.00937649	ATP2A1, STON2, GLI3, RPL6, PPP3CA, CASP8, CDH2, SIX3, DACT3, KIF1A, LDLRAP1, AMN, UNC13A, CD300A, IL13, RHOG, ANK2, AP3B1, MYO7A, GAB2, ATP1B1, SYTL3, ETV5, TNFRSF1A, LAT2, FGR, STX1B, IL23A, PARD3, TLR9, TXNIP, LAMA5, C2CD4C, GATA2, PTGS2, BCL2L11, MXI1, MAP7, OTOF, NLRP3, ZNF268, SNCA, NUS1, JUN, JUP, ANGPT1, PTCH1, DAB2IP, REEP1, TSPAN15, DAB2, GRIN3B, GLRB, BAMBI, SPRY2, SPIRE1, CD24, FGF13, …	655	1102	16650	1.38402	1	0.104783	0.0971385
GOTERM_BP_FAT	GO:0031589~cell-substrate adhesion	22	2.78834	0.00939171	COL17A1, DOCK5, LAMA5, ANGPT1, PTPRJ, PLG, NID1, THBS1, FGFRL1, VEGFA, MMP14, BCL2L11, PLAU, COL5A3, ID1, NINJ1, RAC3, ITGA6, CCR7, PHLDB2, FERMT2, TECTA	655	306	16650	1.82757	1	0.104783	0.0971385
GOTERM_BP_FAT	GO:0006887~exocytosis	27	3.42205	0.00950279	PLEK, PDGFB, PLG, C2CD4C, GATA2, THBS1, CACNA1I, NCS1, OTOF, SNCA, SRGN, ANXA1, UNC13A, CD300A, IL13, IGF2, GAB2, SYTL3, F5, VEGFA, SELP, FGR, LAT2, STX1B, CD9, F2RL1, ZP4	655	404	16650	1.69885	1	0.105842	0.09812
GOTERM_BP_FAT	GO:0006140~regulation of nucleotide metabolic process	17	2.15463	0.00965791	HDAC4, PTGIR, CXCL9, GPR87, PDE4D, AVPR2, ADM, ADCY1, THBS1, CBFA2T3, TSHR, VEGFA, CXCL10, NPPC, ADCYAP1, ADORA2A, SNCA	655	212	16650	2.03838	1	0.107022	0.0992137
GOTERM_BP_FAT	GO:0006813~potassium ion transport	17	2.15463	0.00965791	KCNK7, CDKN1B, KCNJ15, ATP1B4, AKAP7, NEDD4L, KCNAB1, ANK2, KCNJ18, KCNA6, ATP1B1, SLC9A2, ADCYAP1, KCNQ3, KCNMB4, SLC12A7, SLC12A8	655	212	16650	2.03838	1	0.107022	0.0992137
GOTERM_BP_FAT	GO:0010950~positive regulation of endopeptidase activity	13	1.64766	0.00967984	EGLN3, CDKN1B, FASLG, TNFRSF10A, BCL2L11, AIM2, CASP8, PERP, CASP1, TNFSF10, NLRP3, PPARG, SNCA	655	141	16650	2.34367	1	0.107022	0.0992137
GOTERM_BP_FAT	GO:1990138~neuron projection extension	13	1.64766	0.00967984	UNC13A, KDM1A, BCL11A, RAPH1, NEDD4L, RASAL1, L1CAM, VEGFA, CDH4, SLIT1, SLIT2, PLXNC1, PLXNA4	655	141	16650	2.34367	1	0.107022	0.0992137
GOTERM_BP_FAT	GO:0042108~positive regulation of cytokine biosynthetic process	8	1.01394	0.00969057	SPN, CCL20, EBI3, MAPKAPK2, TLR9, PRKCQ, THBS1, ZFPM1	655	61	16650	3.33375	1	0.107022	0.0992137
GOTERM_BP_FAT	GO:0003012~muscle system process	27	3.42205	0.00973635	HDAC4, DOCK5, MYOM1, RYR2, BMP10, CHRNA3, HTR2B, DYSF, NEDD4L, STC1, ATP2A1, RCSD1, PTGS2, PPP3CA, DSP, ARG2, MEF2C, JUP, CCDC78, PDE4D, ANK2, ATP1B1, ADRA2B, MYL4, SLC6A8, FGF13, SNTB1	655	405	16650	1.69466	1	0.10729	0.0994627
GOTERM_BP_FAT	GO:0060350~endochondral bone morphogenesis	7	0.887199	0.00979365	NPPC, MEF2C, MMP14, RARG, MMP13, MATN1, STC1	655	47	16650	3.78593	1	0.10729	0.0994627
GOTERM_BP_FAT	GO:0051145~smooth muscle cell differentiation	7	0.887199	0.00979365	MEF2C, OLFM2, PDGFB, RBPMS2, ADM, NFATC4, VEGFA	655	47	16650	3.78593	1	0.10729	0.0994627
GOTERM_BP_FAT	GO:0032613~interleukin-10 production	7	0.887199	0.00979365	HLA-DRB5, IL23A, TNFRSF9, TLR9, F2RL1, XCL1, TRIB2	655	47	16650	3.78593	1	0.10729	0.0994627
GOTERM_BP_FAT	GO:0046636~negative regulation of alpha-beta T cell activation	5	0.633714	0.00981335	ANXA1, ADORA2A, CD300A, XCL1, GLI3	655	22	16650	5.77724	1	0.10729	0.0994627
GOTERM_BP_FAT	GO:0090023~positive regulation of neutrophil chemotaxis	5	0.633714	0.00981335	IL23A, C3AR1, XCL1, CCR7, CXCL3	655	22	16650	5.77724	1	0.10729	0.0994627
GOTERM_BP_FAT	GO:0090596~sensory organ morphogenesis	19	2.40811	0.0098868	TBX1, RARG, FASLG, ATP2B2, MYO7A, RORB, HOXC13, GATA2, GLI3, PAX2, TSHR, VEGFA, SDK1, MYO15A, SIX3, LRIG1, SPRY2, LRIG3, CTHRC1	655	250	16650	1.93191	1	0.107913	0.10004
GOTERM_BP_FAT	GO:0010558~negative regulation of macromolecule biosynthetic process	74	9.37896	0.009915	FOXA1, RARG, CDKN1B, KDM1A, GFI1, WWC2, NRARP, FASLG, IKZF1, RORB, GLI3, IKZF4, PPP3CA, ZIC2, SIX3, MYB, WWC3, GRB10, JARID2, IL6R, EOMES, HES6, MEF2C, TLE1, TSC22D3, ZBTB32, ARID5B, CBFA2T3, RUNX3, PAX2, ETV6, ZEB2, TXNIP, HOXB3, XCL1, PPARG, TRIB2, ZFPM1, ATF3, HDAC4, PIF1, MAGEL2, SATB1, LEF1, PDGFB, NEDD4L, GATA2, HDAC9, FOXO1, PURB, PCBP3, MXI1, TBL1Y, ZNF268, SNCA, PLK3, JUN, BCL11A, PTCH1,…	655	1418	16650	1.32656	1	0.107991	0.100112
GOTERM_BP_FAT	GO:0045934~negative regulation of nucleobase-containing compound metabolic process	72	9.12548	0.00992701	FOXA1, RARG, CDKN1B, KDM1A, GFI1, WWC2, NRARP, FASLG, IKZF1, RORB, GLI3, IKZF4, NPPC, PPP3CA, ZIC2, SIX3, MYB, WWC3, JARID2, EOMES, HES6, MEF2C, TLE1, TSC22D3, ZBTB32, ARID5B, CBFA2T3, RUNX3, PAX2, ETV6, ZEB2, TXNIP, HOXB3, XCL1, PPARG, ZFPM1, ATF3, HDAC4, PIF1, MAGEL2, SATB1, GPR87, LEF1, PDGFB, NEDD4L, GATA2, HDAC9, FOXO1, PURB, PCBP3, MXI1, TBL1Y, ZNF268, SNCA, PLK3, JUN, BCL11A, GZMA, PTCH1, …	655	1371	16650	1.33496	1	0.107991	0.100112
GOTERM_BP_FAT	GO:0007264~small GTPase mediated signal transduction	33	4.18251	0.00996261	RAB3B, DOCK5, SHC2, DOCK9, RASEF, C15ORF62, ARHGAP18, RASAL1, LPAR4, EPS8, PREX2, FGD4, FGD5, RASGEF1C, PLEKHG4B, RAC3, EPS8L2, SLIT2, JUN, ARHGEF39, DAB2IP, RHOG, ARHGAP29, RHOB, ARL4C, DOK3, LPAR6, MAPKAPK2, SPRY2, F2RL1, RHOU, RHOV, RAB7B	655	527	16650	1.59176	1	0.108199	0.100305
GOTERM_BP_FAT	GO:0050866~negative regulation of cell activation	14	1.7744	0.0100163	HLA-DRB5, ANXA1, CD300A, PDGFB, IL31RA, DTX1, NRARP, INHBA, GLI3, SPN, ADORA2A, XCL1, PAG1, CD200	655	159	16650	2.23823	1	0.108549	0.100629
GOTERM_BP_FAT	GO:1903532~positive regulation of secretion by cell	23	2.91508	0.0100426	HLA-DRB5, UNC13A, IL26, IL13, HTR2B, INHBA, GAB2, RETN, GATA2, FGR, CACNA1I, STX1B, ADCYAP1, AIM2, ADORA2A, NCS1, CASP1, F2RL1, NLRP3, SOX4, NTSR1, SLAMF1, SNCA	655	327	16650	1.78794	1	0.108549	0.100629
GOTERM_BP_FAT	GO:1904062~regulation of cation transmembrane transport	17	2.15463	0.0100761	RYR2, CXCL9, AHNAK, PDE4D, IL13, AKAP7, NEDD4L, KCNAB1, ANK2, ATP1B1, CXCL10, CD19, TLR9, XCL1, NTSR1, PTPN3, SNCA	655	213	16650	2.02881	1	0.108549	0.100629
GOTERM_BP_FAT	GO:0032368~regulation of lipid transport	10	1.26743	0.0100779	REPIN1, NUS1, CYP4F2, PTCH1, LIPG, PPARG, RETN, PLTP, THBS1, NTSR1	655	92	16650	2.76303	1	0.108549	0.100629
GOTERM_BP_FAT	GO:0072080~nephron tubule development	10	1.26743	0.0100779	LAMA5, MEF2C, WT1, PTCH1, LIF, KLHL3, CD24, GLI3, PAX2, VEGFA	655	92	16650	2.76303	1	0.108549	0.100629
GOTERM_BP_FAT	GO:1905153~regulation of membrane invagination	4	0.506971	0.0101762	CD300A, F2RL1, PPARG, GATA2	655	12	16650	8.47328	1	0.109428	0.101444
GOTERM_BP_FAT	GO:0002695~negative regulation of leukocyte activation	13	1.64766	0.010209	HLA-DRB5, ANXA1, CD300A, IL31RA, DTX1, NRARP, INHBA, GLI3, SPN, ADORA2A, XCL1, PAG1, CD200	655	142	16650	2.32717	1	0.1096	0.101604
GOTERM_BP_FAT	GO:0016055~Wnt signaling pathway	30	3.80228	0.010423	RYR2, RARG, LEF1, NRARP, CXXC4, FOXO1, GLI3, PPP3CA, CDH2, SIX3, GRB10, DACT3, SOX4, CTHRC1, TLE1, JUP, DAB2IP, HMGA2, TMEM64, NFATC4, VANGL1, DAB2, BAMBI, AMOTL2, NOTUM, AMOTL1, CD24, PLCB2, CDK14, FERMT2	655	468	16650	1.62948	1	0.111714	0.103563
GOTERM_BP_FAT	GO:0061333~renal tubule morphogenesis	9	1.14068	0.0105423	LAMA5, MEF2C, COL4A1, WT1, PTCH1, KLHL3, GLI3, PAX2, VEGFA	655	77	16650	2.97115	1	0.112808	0.104578
GOTERM_BP_FAT	GO:0008016~regulation of heart contraction	18	2.28137	0.010577	DSP, HDAC4, RYR2, BMP10, JUP, EPAS1, PDE4D, ITPR1, STC1, ADM, ATP2A1, ATP2B2, ANK2, ATP1B1, SLC8A2, MYL4, NPPC, FGF13	655	233	16650	1.96377	1	0.112994	0.10475
GOTERM_BP_FAT	GO:0050806~positive regulation of synaptic transmission	11	1.39417	0.010626	RAB3B, STX1B, ADCYAP1, UNC13A, ADORA2A, NETO1, RETN, PTGS2, NTSR1, SNCA, SLC8A2	655	109	16650	2.56531	1	0.11325	0.104988
GOTERM_BP_FAT	GO:0051235~maintenance of location	21	2.6616	0.0106518	SRGN, RYR2, CXCL9, JUP, PDE4D, IL13, ITPR1, HTR2B, ATP2A1, ANK2, HK2, CXCL10, CD19, FTH1, MXI1, XCL1, FLNB, CCR7, PPARG, NTSR1, SNCA	655	290	16650	1.84075	1	0.11325	0.104988
GOTERM_BP_FAT	GO:0048762~mesenchymal cell differentiation	15	1.90114	0.0106529	EOMES, FOXA1, TBX1, LAMA5, MEF2C, LEF1, DAB2IP, HTR2B, HMGA2, PAX2, DAB2, BAMBI, RDH10, ALDH1A2, DACT3	655	178	16650	2.14212	1	0.11325	0.104988
GOTERM_BP_FAT	GO:0198738~cell-cell signaling by wnt	30	3.80228	0.0107065	RYR2, RARG, LEF1, NRARP, CXXC4, FOXO1, GLI3, PPP3CA, CDH2, SIX3, GRB10, DACT3, SOX4, CTHRC1, TLE1, JUP, DAB2IP, HMGA2, TMEM64, NFATC4, VANGL1, DAB2, BAMBI, AMOTL2, NOTUM, AMOTL1, CD24, PLCB2, CDK14, FERMT2	655	469	16650	1.626	1	0.113635	0.105344
GOTERM_BP_FAT	GO:0030010~establishment of cell polarity	10	1.26743	0.0107817	BRSK1, PARD3, UST, FSCN1, SPRY2, CCR7, FRMD4A, AMOTL1, FRMD4B, FGF13	655	93	16650	2.73332	1	0.114215	0.105882
GOTERM_BP_FAT	GO:0060324~face development	7	0.887199	0.010831	TBX1, RARG, CRISPLD1, ALDH1A2, LEF1, HOXB3, ARID5B	655	48	16650	3.70706	1	0.114215	0.105882
GOTERM_BP_FAT	GO:0014015~positive regulation of gliogenesis	7	0.887199	0.010831	TENM4, BIN1, CLCF1, LIF, CXCR4, PPARG, ETV5	655	48	16650	3.70706	1	0.114215	0.105882
GOTERM_BP_FAT	GO:0003382~epithelial cell morphogenesis	7	0.887199	0.010831	WT1, ID1, DACT2, LIF, STC1, FLNB, PAX2	655	48	16650	3.70706	1	0.114215	0.105882
GOTERM_BP_FAT	GO:0051962~positive regulation of nervous system development	29	3.67554	0.0108739	FOXA1, TENM4, KDM1A, AMIGO2, NEDD4L, CXCR4, RASAL1, GATA2, GLI3, CDH4, FLRT2, SLIT2, MEF2C, UNC13A, BCL11A, DAB2IP, LIF, L1CAM, ADRA2B, ETV5, PAX2, VEGFA, ADCYAP1, BIN1, PARD3, CLCF1, PLXNB2, PPARG, AGRN	655	449	16650	1.64182	1	0.114483	0.10613
GOTERM_BP_FAT	GO:0001505~regulation of neurotransmitter levels	16	2.02788	0.0111109	RAB3B, BRSK1, MEF2C, CHRNA3, UNC13A, SLC32A1, GAD1, C2CD4C, DBH, SYN2, SYTL3, STX1B, ADORA2A, OTOF, KCNMB4, SNCA	655	197	16650	2.06456	1	0.11679	0.108269
GOTERM_BP_FAT	GO:0032963~collagen metabolic process	11	1.39417	0.0112915	MMP14, MMP13, COL4A1, CREB3L1, COL5A3, COL7A1, ID1, PPARG, RETN, MMP8, IL6R	655	110	16650	2.54198	1	0.118497	0.109852
GOTERM_BP_FAT	GO:0048771~tissue remodeling	13	1.64766	0.0113343	MEF2C, ANXA1, EPAS1, LIF, PLG, TMEM64, DBH, PPP3CA, MMP14, RASSF2, EFNA2, IL23A, CTHRC1	655	144	16650	2.29485	1	0.118755	0.110091
GOTERM_BP_FAT	GO:0032844~regulation of homeostatic process	29	3.67554	0.0114175	RYR2, PIF1, CXCL9, KDM1A, HTR2B, ITPR1, NEDD4L, GATA2, PTGS2, FOXO1, CD19, CCR7, MAP3K4, NTSR1, SNCA, HLA-DRB5, ANXA1, PDE4D, TSC22D3, IL13, AVPR2, ANK2, INHBA, TMEM64, CXCL10, ADORA2A, XCL1, PRKCQ, ZFPM1	655	451	16650	1.63454	1	0.119437	0.110723
GOTERM_BP_FAT	GO:0051588~regulation of neurotransmitter transport	8	1.01394	0.0114945	RAB3B, STX1B, MEF2C, CHRNA3, UNC13A, ADORA2A, KCNMB4, SNCA	655	63	16650	3.22792	1	0.120049	0.111291
GOTERM_BP_FAT	GO:0014013~regulation of gliogenesis	10	1.26743	0.0115218	ADCYAP1, CDH2, TENM4, BIN1, CLCF1, LIF, HMGA2, CXCR4, PPARG, ETV5	655	94	16650	2.70424	1	0.120142	0.111377
GOTERM_BP_FAT	GO:0050670~regulation of lymphocyte proliferation	16	2.02788	0.0116019	MEF2C, HLA-DRB5, ANXA1, CD300A, EBI3, IL13, IGF2, SPN, TMIGD2, IL23A, CLCF1, XCL1, PRKCQ, CD24, ZP4, SLAMF1	655	198	16650	2.05413	1	0.120594	0.111796
GOTERM_BP_FAT	GO:0090257~regulation of muscle system process	16	2.02788	0.0116019	DSP, HDAC4, DOCK5, RYR2, BMP10, CHRNA3, JUP, PDE4D, STC1, ATP2A1, ANK2, ATP1B1, PTGS2, ADRA2B, PPP3CA, FGF13	655	198	16650	2.05413	1	0.120594	0.111796
GOTERM_BP_FAT	GO:0051248~negative regulation of protein metabolic process	57	7.22433	0.0116518	CDKN1B, KDM1A, PTPRJ, PPP3CA, RASSF2, CASP8, RGS3, CHAC1, JARID2, SOX4, RAG1, DUSP4, SPINK2, CD300A, PDE4D, IL1R2, DUSP9, PAX2, ADORA2A, PARD3, TRIB1, TRIB2, ZFPM1, ATF3, CSTA, LEF1, FAM129A, FBXO43, CST7, THBS1, PPM1E, FOXO1, UBE2J1, SOCS1, FLRT2, SUSD4, SH3BP5, SLIT2, SNCA, JUN, CDKN2C, ANGPT1, GADD45A, DAB2IP, LIF, CRIM1, INHBA, VEGFA, WT1, COL7A1, SPRY2, F2RL1, SERPINI1, PI16, BCOR, CPEB2, PT…	655	1049	16650	1.38125	1	0.120919	0.112097
GOTERM_BP_FAT	GO:0043406~positive regulation of MAP kinase activity	17	2.15463	0.0117436	MEF2C, SHC2, DAB2IP, PDGFB, HTR2B, CXCR4, THBS1, ADRA2B, DUSP9, VEGFA, IRAK2, PDGFC, MAPKAPK2, TLR9, S1PR2, CD24, MAP3K4	655	217	16650	1.99142	1	0.12168	0.112802
GOTERM_BP_FAT	GO:0034765~regulation of ion transmembrane transport	26	3.29531	0.0118947	RYR2, KCNK7, CXCL9, AHNAK, NEDD4L, AKAP7, KCNA6, THBS1, CACNA1I, CD19, NTSR1, SNCA, MEF2C, PDE4D, IL13, KCNJ15, ANO9, KCNAB1, ANK2, KCNJ18, ATP1B1, CXCL10, KCNQ3, TLR9, XCL1, PTPN3	655	392	16650	1.68601	1	0.122588	0.113644
GOTERM_BP_FAT	GO:0099531~presynaptic process involved in chemical synaptic transmission	13	1.64766	0.0119316	RAB3B, BRSK1, CHRNA3, UNC13A, SLC32A1, GAD1, C2CD4C, SYN2, SYTL3, STX1B, ADORA2A, OTOF, SNCA	655	145	16650	2.27902	1	0.122588	0.113644
GOTERM_BP_FAT	GO:0042116~macrophage activation	7	0.887199	0.0119438	JUN, CSF2, IL13, IL31RA, THBS1, CD200, SNCA	655	49	16650	3.63141	1	0.122588	0.113644
GOTERM_BP_FAT	GO:0002763~positive regulation of myeloid leukocyte differentiation	7	0.887199	0.0119438	JUN, CASP8, IL23A, LEF1, LIF, TMEM64, TRIB1	655	49	16650	3.63141	1	0.122588	0.113644
GOTERM_BP_FAT	GO:0010524~positive regulation of calcium ion transport into cytosol	7	0.887199	0.0119438	CXCL10, CXCL9, CD19, IL13, XCL1, NTSR1, SNCA	655	49	16650	3.63141	1	0.122588	0.113644
GOTERM_BP_FAT	GO:0070231~T cell apoptotic process	7	0.887199	0.0119438	BCL2L11, TSC22D3, RORC, FASLG, PRKCQ, GLI3, RAG1	655	49	16650	3.63141	1	0.122588	0.113644
GOTERM_BP_FAT	GO:0052548~regulation of endopeptidase activity	25	3.16857	0.0119908	CSTA, CDKN1B, LEF1, FASLG, CST7, THBS1, CASP8, BCL2L11, PERP, CASP1, TNFSF10, NLRP3, RAG1, SNCA, EGLN3, SPINK2, CRIM1, TNFRSF10A, PAX2, VEGFA, AIM2, ADORA2A, COL7A1, PPARG, SERPINI1	655	372	16650	1.70832	1	0.122877	0.113912
GOTERM_BP_FAT	GO:0032944~regulation of mononuclear cell proliferation	16	2.02788	0.0121098	MEF2C, HLA-DRB5, ANXA1, CD300A, EBI3, IL13, IGF2, SPN, TMIGD2, IL23A, CLCF1, XCL1, PRKCQ, CD24, ZP4, SLAMF1	655	199	16650	2.04381	1	0.123709	0.114684
GOTERM_BP_FAT	GO:2000021~regulation of ion homeostasis	16	2.02788	0.0121098	RYR2, CXCL9, PDE4D, AVPR2, IL13, ITPR1, HTR2B, NEDD4L, ANK2, CXCL10, ADORA2A, CD19, XCL1, CCR7, NTSR1, SNCA	655	199	16650	2.04381	1	0.123709	0.114684
GOTERM_BP_FAT	GO:0042475~odontogenesis of dentin-containing tooth	9	1.14068	0.0122145	TBX1, LAMA5, BCL2L11, PERP, LEF1, ADM, ITGA6, GLI3, FOXO1	655	79	16650	2.89593	1	0.124584	0.115495
GOTERM_BP_FAT	GO:0050803~regulation of synapse structure or activity	18	2.28137	0.0123739	MEF2C, UNC13A, AMIGO2, DAB2IP, ATP2B2, PTGS2, ETV5, SHISA7, NFATC4, SLC8A2, STX1B, ADORA2A, CDH2, NETO1, FLRT2, SLIT1, AGRN, SNCA	655	237	16650	1.93062	1	0.126014	0.11682
GOTERM_BP_FAT	GO:0019725~cellular homeostasis	47	5.95691	0.0124461	RYR2, CXCL9, NCF2, HTR2B, ITPR1, NEDD4L, CXCR4, STC1, ADM, FASLG, ATP2A1, LPAR4, GATA2, FOXO1, HK2, SLC8A2, PPP3CA, CD19, FTH1, C3AR1, CCR7, ATP6V0A4, SLC12A7, SOX4, NTSR1, SNCA, PTGIR, MEF2C, HLA-DRB5, TXNRD1, EPHX2, PDE4D, IL13, ANK2, ATP2B2, TMEM64, ATP1B1, PAX2, SLC9A2, CXCL10, ADCYAP1, CCKBR, LPAR6, F2RL1, XCL1, CD24, SGK1	655	833	16650	1.43425	1	0.126552	0.117319
GOTERM_BP_FAT	GO:0032535~regulation of cellular component size	24	3.04183	0.0127063	RAB3B, VASP, SPTBN5, MAGEL2, RARG, KDM1A, BCL11A, PLEK, C15ORF62, ARHGAP18, ATP2B2, L1CAM, SSH3, VEGFA, EPS8, CDH4, F2RL1, SPIRE1, CCR7, SLIT2, PLXNC1, FGF13, SLC12A7, PLXNA4	655	354	16650	1.72338	1	0.128836	0.119437
GOTERM_BP_FAT	GO:0048667~cell morphogenesis involved in neuron differentiation	31	3.92902	0.0127157	BRSK1, SPTBN5, RAPH1, ADCY1, GLI3, PREX2, PPP3CA, CDH4, FLRT2, GPC1, SLIT1, SLIT2, PLXNC1, PLXNA4, VASP, MEF2C, BCL11A, ATP2B2, MYO7A, L1CAM, PAX2, NFATC4, VEGFA, EFNA3, EFNA2, PARD3, ID1, TLR9, PLXNB2, PRKCQ, FGF13	655	496	16650	1.58874	1	0.128836	0.119437
GOTERM_BP_FAT	GO:0030814~regulation of cAMP metabolic process	12	1.52091	0.0127627	NPPC, ADCYAP1, CXCL10, CXCL9, PTGIR, ADORA2A, PDE4D, GPR87, AVPR2, ADM, ADCY1, TSHR	655	129	16650	2.36464	1	0.128836	0.119437
GOTERM_BP_FAT	GO:0030278~regulation of ossification	15	1.90114	0.0127721	SRGN, HDAC4, MEF2C, PTCH1, RORB, TMEM64, GLI3, NPPC, RASSF2, ID1, MATN1, ID3, BCOR, IL6R, CTHRC1	655	182	16650	2.09504	1	0.128836	0.119437
GOTERM_BP_FAT	GO:0002295~T-helper cell lineage commitment	4	0.506971	0.0128482	IL23A, ZFPM1, LY9, BATF	655	13	16650	7.82149	1	0.128836	0.119437
GOTERM_BP_FAT	GO:0072160~nephron tubule epithelial cell differentiation	4	0.506971	0.0128482	MEF2C, LIF, CD24, PAX2	655	13	16650	7.82149	1	0.128836	0.119437
GOTERM_BP_FAT	GO:0035743~CD4-positive, alpha-beta T cell cytokine production	4	0.506971	0.0128482	IL31RA, NLRP3, XCL1, SLAMF1	655	13	16650	7.82149	1	0.128836	0.119437
GOTERM_BP_FAT	GO:0002674~negative regulation of acute inflammatory response	4	0.506971	0.0128482	SPN, ADCYAP1, NLRP3, PPARG	655	13	16650	7.82149	1	0.128836	0.119437
GOTERM_BP_FAT	GO:0097296~activation of cysteine-type endopeptidase activity involved in apoptotic signaling pathway	4	0.506971	0.0128482	CASP8, TNFSF10, FASLG, TNFRSF10A	655	13	16650	7.82149	1	0.128836	0.119437
GOTERM_BP_FAT	GO:0009892~negative regulation of metabolic process	121	15.3359	0.0129283	FOXA1, KDM1A, GFI1, WWC2, IKZF1, RORB, IKZF4, NPPC, RASSF2, RGS3, MYB, WWC3, GRB10, CHAC1, IL6R, SOX4, RAG1, EOMES, HES6, SPINK2, MEF2C, TLE1, CD300A, IL1R2, ZBTB32, ARID5B, RUNX3, PARD3, TXNIP, HOXB3, TRIB1, TRIB2, ZFPM1, ATF3, PIF1, MAGEL2, GPR87, PDGFB, NEDD4L, GATA2, FBXO43, FOXO1, UBE2J1, SOCS1, PCBP3, FLRT2, ZNF268, TMEM132D, PLK3, JUN, BCL11A, GADD45A, PTCH1, CRIM1, LIF, HMGA2, INHBA, ESR2…	655	2522	16650	1.21959	1	0.129441	0.119997
GOTERM_BP_FAT	GO:0051047~positive regulation of secretion	24	3.04183	0.0130357	HLA-DRB5, UNC13A, IL26, CYP4F2, IL13, HTR2B, INHBA, GAB2, RETN, GATA2, FGR, CACNA1I, STX1B, ADCYAP1, AIM2, ADORA2A, NCS1, CASP1, F2RL1, NLRP3, SOX4, NTSR1, SLAMF1, SNCA	655	355	16650	1.71852	1	0.130317	0.120809
GOTERM_BP_FAT	GO:1903038~negative regulation of leukocyte cell-cell adhesion	10	1.26743	0.013115	SPN, HLA-DRB5, ANXA1, ADORA2A, CD300A, DTX1, XCL1, NRARP, PAG1, GLI3	655	96	16650	2.6479	1	0.130907	0.121356
GOTERM_BP_FAT	GO:0050819~negative regulation of coagulation	7	0.887199	0.0131347	PLAU, ANXA5, KRT1, PDGFB, PLG, THBS1, KLKB1	655	50	16650	3.55878	1	0.130907	0.121356
GOTERM_BP_FAT	GO:0030178~negative regulation of Wnt signaling pathway	16	2.02788	0.0131776	TLE1, LEF1, DAB2IP, HMGA2, TMEM64, CXXC4, FOXO1, GLI3, NFATC4, DAB2, CDH2, SIX3, GRB10, DACT3, NOTUM, CTHRC1	655	201	16650	2.02347	1	0.131134	0.121567
GOTERM_BP_FAT	GO:0045580~regulation of T cell differentiation	11	1.39417	0.0134778	IL1RL2, ANXA1, IL36B, IL23A, MYB, DTX1, NLRP3, NRARP, AP3B1, GLI3, RAG1	655	113	16650	2.4745	1	0.133821	0.124058
GOTERM_BP_FAT	GO:0043618~regulation of transcription from RNA polymerase II promoter in response to stress	8	1.01394	0.0135295	JUN, EGLN3, EPAS1, CREB3L1, CA9, ATF3, KLF2, VEGFA	655	65	16650	3.1286	1	0.133821	0.124058
GOTERM_BP_FAT	GO:0007588~excretion	8	1.01394	0.0135295	CHRNA3, AMN, ADORA2A, MDK, AVPR2, STC1, NEDD4L, ATP6V0A4	655	65	16650	3.1286	1	0.133821	0.124058
GOTERM_BP_FAT	GO:0019935~cyclic-nucleotide-mediated signaling	8	1.01394	0.0135295	ADCYAP1, CXCL10, CXCL9, PTGIR, PDE4D, ADM, ADCY1, THBS1	655	65	16650	3.1286	1	0.133821	0.124058
GOTERM_BP_FAT	GO:2000113~negative regulation of cellular macromolecule biosynthetic process	69	8.74525	0.0136782	FOXA1, RARG, CDKN1B, KDM1A, GFI1, WWC2, NRARP, FASLG, IKZF1, RORB, GLI3, IKZF4, PPP3CA, ZIC2, SIX3, MYB, WWC3, GRB10, JARID2, EOMES, HES6, MEF2C, TLE1, TSC22D3, ZBTB32, ARID5B, CBFA2T3, RUNX3, PAX2, ETV6, ZEB2, TXNIP, HOXB3, XCL1, PPARG, ZFPM1, ATF3, HDAC4, PIF1, MAGEL2, SATB1, LEF1, PDGFB, NEDD4L, GATA2, HDAC9, FOXO1, PURB, PCBP3, ZNF268, SNCA, PLK3, JUN, BCL11A, PTCH1, DAB2IP, HMGA2, ESR2, NFAT…	655	1324	16650	1.32475	1	0.135088	0.125232
GOTERM_BP_FAT	GO:0045926~negative regulation of growth	18	2.28137	0.0138628	BMP10, CDKN1B, CDKN2C, BCL11A, PTCH1, WWC2, OSGIN1, PTPRJ, INHBA, ESR2, PSRC1, WT1, WWC3, DACT3, PPARG, SLIT2, FGF13, CGA	655	240	16650	1.90649	1	0.136705	0.126731
GOTERM_BP_FAT	GO:0032269~negative regulation of cellular protein metabolic process	54	6.84411	0.0139268	CDKN1B, KDM1A, PTPRJ, PPP3CA, RASSF2, CASP8, RGS3, CHAC1, JARID2, SOX4, RAG1, DUSP4, SPINK2, CD300A, PDE4D, IL1R2, DUSP9, PAX2, ADORA2A, PARD3, TRIB1, TRIB2, ATF3, CSTA, LEF1, FAM129A, FBXO43, CST7, THBS1, PPM1E, FOXO1, SOCS1, FLRT2, SUSD4, SH3BP5, SLIT2, SNCA, JUN, CDKN2C, ANGPT1, GADD45A, DAB2IP, LIF, CRIM1, VEGFA, WT1, COL7A1, SPRY2, F2RL1, SERPINI1, PI16, BCOR, CPEB2, PTPN3	655	992	16650	1.38374	1	0.137124	0.12712
GOTERM_BP_FAT	GO:0048015~phosphatidylinositol-mediated signaling	15	1.90114	0.0139473	PRR5, ANGPT1, DAB2IP, PDGFB, HTR2B, GAB2, MUC5AC, SELP, PREX2, FGR, CD19, PDGFC, NCS1, F2RL1, PLCH1	655	184	16650	2.07227	1	0.137124	0.12712
GOTERM_BP_FAT	GO:2001016~positive regulation of skeletal muscle cell differentiation	3	0.380228	0.0142343	TBX1, MEF2C, GPC1	655	5	16650	15.2519	1	0.139317	0.129152
GOTERM_BP_FAT	GO:0030223~neutrophil differentiation	3	0.380228	0.0142343	CSF2, LEF1, TRIB1	655	5	16650	15.2519	1	0.139317	0.129152
GOTERM_BP_FAT	GO:0003418~growth plate cartilage chondrocyte differentiation	3	0.380228	0.0142343	NPPC, RARG, MATN1	655	5	16650	15.2519	1	0.139317	0.129152
GOTERM_BP_FAT	GO:0042471~ear morphogenesis	11	1.39417	0.0142728	TBX1, MYO15A, LRIG1, SPRY2, LRIG3, ATP2B2, MYO7A, GATA2, PAX2, TSHR, CTHRC1	655	114	16650	2.45279	1	0.139485	0.129308
GOTERM_BP_FAT	GO:0045765~regulation of angiogenesis	17	2.15463	0.014331	CCBE1, STARD13, KRT1, DAB2IP, FASLG, ADM, GATA2, PTGS2, HDAC9, THBS1, RHOB, VEGFA, CXCL10, TMIGD2, ID1, STAB1, C3AR1	655	222	16650	1.94656	1	0.13966	0.129471
GOTERM_BP_FAT	GO:0045862~positive regulation of proteolysis	24	3.04183	0.0143407	CCBE1, PLK3, EGLN3, CDKN1B, PCOLCE2, DAB2IP, FASLG, TNFRSF10A, CBFA2T3, DAB2, MMP14, BCL2L11, AIM2, CASP8, ASTL, PERP, CASP1, TNFSF10, NLRP3, PPARG, TRIB1, KLKB1, TRIB2, SNCA	655	358	16650	1.70412	1	0.13966	0.129471
GOTERM_BP_FAT	GO:0043086~negative regulation of catalytic activity	47	5.95691	0.0143548	PIF1, CSTA, CDKN1B, GPR87, GFI1, LEF1, PTPRJ, FBXO43, CST7, THBS1, PPM1E, CASP8, SOCS1, RGS3, FLRT2, SH3BP5, SLIT2, RAG1, SNCA, TMEM132D, DUSP4, SPINK2, CDKN2C, ANXA1, GADD45A, CD300A, GZMA, IL13, ANXA5, DAB2IP, CRIM1, DUSP9, PAX2, VEGFA, CAMSAP3, ADCYAP1, ADORA2A, COL7A1, TLR9, TXNIP, SPRY2, PPARG, SERPINI1, PI16, TRIB1, CPEB2, TRIB2	655	839	16650	1.424	1	0.13966	0.129471
GOTERM_BP_FAT	GO:0046928~regulation of neurotransmitter secretion	7	0.887199	0.0144063	STX1B, MEF2C, CHRNA3, UNC13A, ADORA2A, KCNMB4, SNCA	655	51	16650	3.489	1	0.139745	0.129549
GOTERM_BP_FAT	GO:0032655~regulation of interleukin-12 production	7	0.887199	0.0144063	MAST4, IL23A, TNFRSF9, TLR9, CCR7, THBS1, SLAMF1	655	51	16650	3.489	1	0.139745	0.129549
GOTERM_BP_FAT	GO:0050804~modulation of synaptic transmission	20	2.53485	0.0144915	RAB3B, MEF2C, CHRNA3, UNC13A, PLCL2, ATP2B2, RETN, PTGS2, SHISA7, NFATC4, SLC8A2, STX1B, ADCYAP1, PPP3CA, ADORA2A, NETO1, KCNMB4, S1PR2, NTSR1, SNCA	655	280	16650	1.8157	1	0.140363	0.130123
GOTERM_BP_FAT	GO:0032409~regulation of transporter activity	16	2.02788	0.014915	RYR2, MEF2C, AHNAK, PDE4D, ANO9, AKAP7, NEDD4L, KCNAB1, ANK2, ATP1B1, TLR9, PPARG, SGK1, NTSR1, PTPN3, SNCA	655	204	16650	1.99371	1	0.144244	0.133721
GOTERM_BP_FAT	GO:0002250~adaptive immune response	27	3.42205	0.0149363	ITK, EBI3, LEF1, RORC, CD1C, LY9, CD1A, SPN, SIT1, SUSD4, SLAMF7, NLRP3, PAG1, RAG1, SLAMF1, EOMES, MEF2C, HLA-DRB5, ANXA1, IL31RA, BATF, LAT2, CLEC4A, IL23A, CLCF1, XCL1, PRKCQ	655	420	16650	1.63413	1	0.144244	0.133721
GOTERM_BP_FAT	GO:0044259~multicellular organismal macromolecule metabolic process	11	1.39417	0.0151023	MMP14, MMP13, COL4A1, CREB3L1, COL5A3, COL7A1, ID1, PPARG, RETN, MMP8, IL6R	655	115	16650	2.43146	1	0.145258	0.13466
GOTERM_BP_FAT	GO:0034767~positive regulation of ion transmembrane transport	11	1.39417	0.0151023	RYR2, CXCL10, CXCL9, CD19, IL13, XCL1, AKAP7, ANK2, ATP1B1, NTSR1, SNCA	655	115	16650	2.43146	1	0.145258	0.13466
GOTERM_BP_FAT	GO:0007265~Ras protein signal transduction	22	2.78834	0.0151079	JUN, SHC2, ARHGEF39, DAB2IP, C15ORF62, RHOG, ARHGAP29, RASAL1, LPAR4, RHOB, EPS8, PREX2, FGD4, FGD5, DOK3, LPAR6, PLEKHG4B, MAPKAPK2, F2RL1, SPRY2, RHOU, EPS8L2	655	320	16650	1.74761	1	0.145258	0.13466
GOTERM_BP_FAT	GO:0000082~G1/S transition of mitotic cell cycle	17	2.15463	0.0152322	PLK3, CDKN1B, CDKN2C, ANXA1, GADD45A, GFI1, UBE2E2, INHBA, MYO16, PPP3CA, GPR132, SLFN11, CCND2, PIM1, TNKS1BP1, RHOU, SOX4	655	224	16650	1.92918	1	0.146238	0.135569
GOTERM_BP_FAT	GO:0071634~regulation of transforming growth factor beta production	5	0.633714	0.0154684	IL13, XCL1, CD24, PTGS2, THBS1	655	25	16650	5.08397	1	0.148071	0.137268
GOTERM_BP_FAT	GO:0071624~positive regulation of granulocyte chemotaxis	5	0.633714	0.0154684	IL23A, C3AR1, XCL1, CCR7, CXCL3	655	25	16650	5.08397	1	0.148071	0.137268
GOTERM_BP_FAT	GO:0022408~negative regulation of cell-cell adhesion	12	1.52091	0.0157522	SPN, HLA-DRB5, ANXA1, ADORA2A, CD300A, LEF1, DTX1, XCL1, NRARP, PLG, PAG1, GLI3	655	133	16650	2.29352	1	0.149408	0.138508
GOTERM_BP_FAT	GO:0032615~interleukin-12 production	7	0.887199	0.015761	MAST4, IL23A, TNFRSF9, TLR9, CCR7, THBS1, SLAMF1	655	52	16650	3.4219	1	0.149408	0.138508
GOTERM_BP_FAT	GO:0014812~muscle cell migration	8	1.01394	0.0158105	HDAC4, DOCK5, ANXA1, PLAU, PDGFB, SLIT2, RETN, TRIB1	655	67	16650	3.03521	1	0.149408	0.138508
GOTERM_BP_FAT	GO:0034333~adherens junction assembly	8	1.01394	0.0158105	LAMA5, MMP14, JUP, PTPRJ, THBS1, PHLDB2, FERMT2, VEGFA	655	67	16650	3.03521	1	0.149408	0.138508
GOTERM_BP_FAT	GO:0021872~forebrain generation of neurons	8	1.01394	0.0158105	LEF1, SLIT1, LHX6, RAC3, INHBA, SLIT2, GATA2, GLI3	655	67	16650	3.03521	1	0.149408	0.138508
GOTERM_BP_FAT	GO:0042517~positive regulation of tyrosine phosphorylation of Stat3 protein	6	0.760456	0.0158204	IL23A, CLCF1, IL31RA, LIF, IL6R, VEGFA	655	38	16650	4.01366	1	0.149408	0.138508
GOTERM_BP_FAT	GO:0048017~inositol lipid-mediated signaling	15	1.90114	0.0158646	PRR5, ANGPT1, DAB2IP, PDGFB, HTR2B, GAB2, MUC5AC, SELP, PREX2, FGR, CD19, PDGFC, NCS1, F2RL1, PLCH1	655	187	16650	2.03903	1	0.149408	0.138508
GOTERM_BP_FAT	GO:0043373~CD4-positive, alpha-beta T cell lineage commitment	4	0.506971	0.0158823	IL23A, ZFPM1, LY9, BATF	655	14	16650	7.26281	1	0.149408	0.138508
GOTERM_BP_FAT	GO:0042976~activation of Janus kinase activity	4	0.506971	0.0158823	SOCS1, CD300A, IL23A, IL6R	655	14	16650	7.26281	1	0.149408	0.138508
GOTERM_BP_FAT	GO:0043306~positive regulation of mast cell degranulation	4	0.506971	0.0158823	FGR, IL13, GAB2, GATA2	655	14	16650	7.26281	1	0.149408	0.138508
GOTERM_BP_FAT	GO:0033008~positive regulation of mast cell activation involved in immune response	4	0.506971	0.0158823	FGR, IL13, GAB2, GATA2	655	14	16650	7.26281	1	0.149408	0.138508
GOTERM_BP_FAT	GO:0072216~positive regulation of metanephros development	4	0.506971	0.0158823	WT1, PDGFB, LIF, PAX2	655	14	16650	7.26281	1	0.149408	0.138508
GOTERM_BP_FAT	GO:0044843~cell cycle G1/S phase transition	18	2.28137	0.016071	PLK3, CDKN1B, CDKN2C, ANXA1, GADD45A, GFI1, SUSD2, UBE2E2, INHBA, MYO16, PPP3CA, GPR132, SLFN11, CCND2, PIM1, TNKS1BP1, RHOU, SOX4	655	244	16650	1.87523	1	0.150903	0.139893
GOTERM_BP_FAT	GO:0097191~extrinsic apoptotic signaling pathway	17	2.15463	0.0160874	CSF2, BCL2A1, TNFRSF9, DAB2IP, TMC8, FASLG, TNFRSF10A, INHBA, THBS1, TNFRSF10D, TNFRSF1A, BCL2L11, CASP8, TNFSF10, ITGA6, IL6R, ATF3	655	225	16650	1.92061	1	0.150903	0.139893
GOTERM_BP_FAT	GO:0032091~negative regulation of protein binding	9	1.14068	0.016131	DAB2, KDM1A, ID1, LEF1, PDGFB, TMC8, ZFPM1, PTPRF, NFATC4	655	83	16650	2.75637	1	0.151095	0.140072
GOTERM_BP_FAT	GO:0048588~developmental cell growth	15	1.90114	0.0165466	RARG, UNC13A, KDM1A, BCL11A, RAPH1, NEDD4L, RASAL1, L1CAM, VEGFA, CDH4, SLIT1, SLIT2, PLXNC1, FGF13, PLXNA4	655	188	16650	2.02818	1	0.154767	0.143475
GOTERM_BP_FAT	GO:0014065~phosphatidylinositol 3-kinase signaling	10	1.26743	0.0167837	PREX2, SELP, FGR, PRR5, ANGPT1, PDGFC, DAB2IP, PDGFB, HTR2B, F2RL1	655	100	16650	2.54198	1	0.15676	0.145323
GOTERM_BP_FAT	GO:0014074~response to purine-containing compound	13	1.64766	0.0168147	RYR2, JUN, KDM1A, PDE4D, AKAP7, STC1, DNTT, PTGS2, ADORA2A, WT1, CASP1, PPARG, AGXT	655	152	16650	2.17407	1	0.156825	0.145383
GOTERM_BP_FAT	GO:0051130~positive regulation of cellular component organization	62	7.85805	0.0170799	DOCK5, BMP10, CXCL9, CDKN1B, CSF2, KDM1A, PLEK, C15ORF62, PTPRJ, HK2, CDH4, CASP8, MYB, TNFSF10, RAC3, CCR7, LDLRAP1, JARID2, MAP3K4, ANXA1, UNC13A, RHOG, PAX2, ADCYAP1, AIM2, PSRC1, FSCN1, PRKCQ, PPARG, RHOU, PHLDB2, HDAC4, MAGEL2, LEF1, AMIGO2, PDGFB, NEDD4L, RASAL1, GATA2, PPM1E, BCL2L11, FLRT2, EPS8L2, SLIT2, SNCA, VASP, JUN, ANGPT1, BCL11A, DAB2IP, LIF, IGF2, DDHD1, L1CAM, VEGFA, DAB2, BAMBI…	655	1183	16650	1.33223	1	0.159072	0.147466
GOTERM_BP_FAT	GO:0014910~regulation of smooth muscle cell migration	7	0.887199	0.0172013	HDAC4, DOCK5, PLAU, PDGFB, SLIT2, RETN, TRIB1	655	53	16650	3.35734	1	0.159975	0.148303
GOTERM_BP_FAT	GO:0070663~regulation of leukocyte proliferation	16	2.02788	0.0175008	MEF2C, HLA-DRB5, ANXA1, CD300A, EBI3, IL13, IGF2, SPN, TMIGD2, IL23A, CLCF1, XCL1, PRKCQ, CD24, ZP4, SLAMF1	655	208	16650	1.95537	1	0.161858	0.150049
GOTERM_BP_FAT	GO:0030308~negative regulation of cell growth	14	1.7744	0.0175348	BMP10, CDKN1B, CDKN2C, BCL11A, OSGIN1, PTPRJ, INHBA, ESR2, PSRC1, WT1, DACT3, PPARG, SLIT2, FGF13	655	171	16650	2.08116	1	0.161858	0.150049
GOTERM_BP_FAT	GO:0035850~epithelial cell differentiation involved in kidney development	6	0.760456	0.0175771	MEF2C, WT1, PDGFB, LIF, CD24, PAX2	655	39	16650	3.91075	1	0.161858	0.150049
GOTERM_BP_FAT	GO:0046638~positive regulation of alpha-beta T cell differentiation	6	0.760456	0.0175771	ANXA1, IL23A, MYB, NLRP3, AP3B1, GLI3	655	39	16650	3.91075	1	0.161858	0.150049
GOTERM_BP_FAT	GO:0045668~negative regulation of osteoblast differentiation	6	0.760456	0.0175771	HDAC4, PTCH1, ID1, ID3, RORB, TMEM64	655	39	16650	3.91075	1	0.161858	0.150049
GOTERM_BP_FAT	GO:0090184~positive regulation of kidney development	6	0.760456	0.0175771	WT1, PDGFB, LIF, CD24, PAX2, VEGFA	655	39	16650	3.91075	1	0.161858	0.150049
GOTERM_BP_FAT	GO:0010596~negative regulation of endothelial cell migration	6	0.760456	0.0175771	STARD13, BMP10, DAB2IP, STC1, SLIT2, THBS1	655	39	16650	3.91075	1	0.161858	0.150049
GOTERM_BP_FAT	GO:0042730~fibrinolysis	5	0.633714	0.0177265	PLAU, KRT1, PLG, THBS1, KLKB1	655	26	16650	4.88843	1	0.162319	0.150477
GOTERM_BP_FAT	GO:0021602~cranial nerve morphogenesis	5	0.633714	0.0177265	TBX1, HOXB3, GLI3, PLXNA4, PAX2	655	26	16650	4.88843	1	0.162319	0.150477
GOTERM_BP_FAT	GO:0071604~transforming growth factor beta production	5	0.633714	0.0177265	IL13, XCL1, CD24, PTGS2, THBS1	655	26	16650	4.88843	1	0.162319	0.150477
GOTERM_BP_FAT	GO:0070528~protein kinase C signaling	5	0.633714	0.0177265	PLEK, PDGFB, HTR2B, ZP4, VEGFA	655	26	16650	4.88843	1	0.162319	0.150477
GOTERM_BP_FAT	GO:0007270~neuron-neuron synaptic transmission	10	1.26743	0.0178076	RAB3B, GABRB2, ADCYAP1, UNC13A, ADORA2A, GLRB, RAC3, SLC1A4, PTGS2, SNCA	655	101	16650	2.51682	1	0.162643	0.150777
GOTERM_BP_FAT	GO:0034762~regulation of transmembrane transport	26	3.29531	0.0178116	RYR2, KCNK7, CXCL9, AHNAK, NEDD4L, AKAP7, KCNA6, THBS1, CACNA1I, CD19, NTSR1, SNCA, MEF2C, PDE4D, IL13, KCNJ15, ANO9, KCNAB1, ANK2, KCNJ18, ATP1B1, CXCL10, KCNQ3, TLR9, XCL1, PTPN3	655	406	16650	1.62787	1	0.162643	0.150777
GOTERM_BP_FAT	GO:0003006~developmental process involved in reproduction	37	4.68948	0.0178457	FOXA1, RARG, CDKN1B, CSF2, EPAS1, LEF1, PDGFB, STC1, ADM, RETN, PCDH12, GATA2, PTGS2, UBE2J1, NPPC, CASP8, BCL2L11, RDH10, TNFSF10, SLIT2, CGA, MAP3K4, EOMES, SPINK2, ANXA1, LIF, HMGA2, ARID5B, INHBA, ETV5, VEGFA, ADCYAP1, GJB2, MMP14, WT1, COL9A3, PPARG	655	636	16650	1.47883	1	0.162727	0.150855
GOTERM_BP_FAT	GO:0009890~negative regulation of biosynthetic process	76	9.63245	0.0178907	FOXA1, RARG, CDKN1B, KDM1A, GFI1, WWC2, PLEK, NRARP, FASLG, IKZF1, RORB, GLI3, IKZF4, PPP3CA, ZIC2, SIX3, MYB, WWC3, GRB10, JARID2, IL6R, EOMES, HES6, MEF2C, TLE1, TSC22D3, ZBTB32, ARID5B, CBFA2T3, RUNX3, PAX2, ETV6, ZEB2, TXNIP, HOXB3, XCL1, PPARG, TRIB2, ZFPM1, ATF3, HDAC4, PIF1, MAGEL2, SATB1, GPR87, LEF1, PDGFB, NEDD4L, GATA2, HDAC9, FOXO1, PURB, PCBP3, MXI1, TBL1Y, ZNF268, SNCA, PLK3, JUN, B…	655	1504	16650	1.28451	1	0.16291	0.151025
GOTERM_BP_FAT	GO:0031327~negative regulation of cellular biosynthetic process	75	9.5057	0.0179815	FOXA1, RARG, CDKN1B, KDM1A, GFI1, WWC2, PLEK, NRARP, FASLG, IKZF1, RORB, GLI3, IKZF4, PPP3CA, ZIC2, SIX3, MYB, WWC3, GRB10, JARID2, EOMES, HES6, MEF2C, TLE1, TSC22D3, ZBTB32, ARID5B, CBFA2T3, RUNX3, PAX2, ETV6, ZEB2, TXNIP, HOXB3, XCL1, PPARG, TRIB2, ZFPM1, ATF3, HDAC4, PIF1, MAGEL2, SATB1, GPR87, LEF1, PDGFB, NEDD4L, GATA2, HDAC9, FOXO1, PURB, PCBP3, MXI1, TBL1Y, ZNF268, SNCA, PLK3, JUN, BCL11A,…	655	1480	16650	1.28817	1	0.163509	0.15158
GOTERM_BP_FAT	GO:0042306~regulation of protein import into nucleus	14	1.7744	0.0183142	JUP, ANGPT1, DAB2IP, PTGS2, GLI3, PPP3CA, DAB2, IL23A, BAMBI, MXI1, TLR9, DACT3, NLRP3, ZNF268	655	172	16650	2.06906	1	0.166226	0.154098
GOTERM_BP_FAT	GO:0007517~muscle organ development	24	3.04183	0.0183311	EOMES, DSP, TBX1, TEAD4, HDAC4, LAMA5, RYR2, BMP10, MEF2C, TSC22D3, LEF1, LIF, ARID5B, KCNAB1, HDAC9, FGFRL1, CXCL10, PPP3CA, WT1, GPC1, ID3, FLNB, ZFPM1, ATF3	655	366	16650	1.66688	1	0.166226	0.154098
GOTERM_BP_FAT	GO:2000242~negative regulation of reproductive process	7	0.887199	0.0187296	NPPC, CDKN1B, ASTL, WT1, LIF, FBXO43, ZP4	655	54	16650	3.29517	1	0.169369	0.157012
GOTERM_BP_FAT	GO:0001706~endoderm formation	7	0.887199	0.0187296	EOMES, DUSP4, MMP14, COL7A1, HMGA2, INHBA, MMP8	655	54	16650	3.29517	1	0.169369	0.157012
GOTERM_BP_FAT	GO:0043280~positive regulation of cysteine-type endopeptidase activity involved in apoptotic process	11	1.39417	0.0187824	EGLN3, BCL2L11, CDKN1B, CASP8, CASP1, TNFSF10, NLRP3, FASLG, PPARG, TNFRSF10A, SNCA	655	119	16650	2.34973	1	0.169379	0.157021
GOTERM_BP_FAT	GO:0034332~adherens junction organization	11	1.39417	0.0187824	DSP, LAMA5, MMP14, CDH4, JUP, CDH2, PTPRJ, THBS1, PHLDB2, FERMT2, VEGFA	655	119	16650	2.34973	1	0.169379	0.157021
GOTERM_BP_FAT	GO:0071887~leukocyte apoptotic process	10	1.26743	0.0188762	MEF2C, BCL2L11, ANXA1, TSC22D3, RORC, FASLG, CCR7, PRKCQ, GLI3, RAG1	655	102	16650	2.49214	1	0.16999	0.157588
GOTERM_BP_FAT	GO:0021953~central nervous system neuron differentiation	14	1.7744	0.0191196	EOMES, PTCH1, LEF1, ATP2B2, INHBA, GATA2, GLI3, SLIT1, LHX6, RAC3, SLIT2, MDGA1, PLXNA4, SOX4	655	173	16650	2.0571	1	0.171945	0.1594
GOTERM_BP_FAT	GO:0002363~alpha-beta T cell lineage commitment	4	0.506971	0.0192837	IL23A, ZFPM1, LY9, BATF	655	15	16650	6.77863	1	0.172945	0.160327
GOTERM_BP_FAT	GO:0097154~GABAergic neuron differentiation	4	0.506971	0.0192837	LHX6, RAC3, INHBA, GATA2	655	15	16650	6.77863	1	0.172945	0.160327
GOTERM_BP_FAT	GO:0043303~mast cell degranulation	6	0.760456	0.0194582	LAT2, FGR, CD300A, IL13, GAB2, GATA2	655	40	16650	3.81298	1	0.173794	0.161115
GOTERM_BP_FAT	GO:0050701~interleukin-1 secretion	6	0.760456	0.0194582	AIM2, IL1R2, CASP1, NLRP3, F2RL1, CCR7	655	40	16650	3.81298	1	0.173794	0.161115
GOTERM_BP_FAT	GO:2000514~regulation of CD4-positive, alpha-beta T cell activation	6	0.760456	0.0194582	ANXA1, IL23A, MYB, NLRP3, XCL1, PRKCQ	655	40	16650	3.81298	1	0.173794	0.161115
GOTERM_BP_FAT	GO:0043620~regulation of DNA-templated transcription in response to stress	8	1.01394	0.0197242	JUN, EGLN3, EPAS1, CREB3L1, CA9, ATF3, KLF2, VEGFA	655	70	16650	2.90513	1	0.175742	0.16292
GOTERM_BP_FAT	GO:0043009~chordate embryonic development	34	4.30925	0.01973	FOXA1, RARG, CSF2, KDM1A, EPAS1, LEF1, PDGFB, NRARP, ADM, PCDH12, GATA2, GLI3, CASP8, BCL2L11, RDH10, MYO18B, SOX4, CTHRC1, EOMES, VASP, TBX1, ARNT2, MEF2C, ANGPT1, PTCH1, LIF, PAX2, KLF2, VEGFA, XAB2, MMP14, ALDH1A2, HOXB3, PLXNB2	655	577	16650	1.49788	1	0.175742	0.16292
GOTERM_BP_FAT	GO:0060048~cardiac muscle contraction	11	1.39417	0.0197972	DSP, MYL4, HDAC4, RYR2, JUP, PDE4D, STC1, NEDD4L, ANK2, ATP1B1, FGF13	655	120	16650	2.33015	1	0.176101	0.163253
GOTERM_BP_FAT	GO:0042098~T cell proliferation	14	1.7744	0.0199512	HLA-DRB5, ANXA1, SATB1, EBI3, IGF2, SPN, CCND3, TMIGD2, IL23A, XCL1, PRKCQ, CD24, ZP4, SLAMF1	655	174	16650	2.04528	1	0.176851	0.163949
GOTERM_BP_FAT	GO:0042493~response to drug	26	3.29531	0.0199517	HDAC4, CDKN1B, SLC22A1, HTR2B, ADCY1, PTGS2, THBS1, PPM1E, NPPC, PPP3CA, MDK, CA9, SNCA, JUN, MEF2C, ANXA1, GAD1, PTCH1, SORD, HMGA2, INHBA, AIM2, ADORA2A, ADSSL1, TXNIP, PPARG	655	411	16650	1.60807	1	0.176851	0.163949
GOTERM_BP_FAT	GO:0031400~negative regulation of protein modification process	34	4.30925	0.0199627	CDKN1B, KDM1A, FAM129A, PTPRJ, FBXO43, PPM1E, FOXO1, SOCS1, RASSF2, RGS3, FLRT2, SH3BP5, SLIT2, JARID2, SOX4, SNCA, DUSP4, JUN, CDKN2C, ANGPT1, GADD45A, CD300A, PDE4D, DAB2IP, LIF, DUSP9, ADORA2A, PARD3, SPRY2, F2RL1, BCOR, TRIB1, TRIB2, ATF3	655	578	16650	1.49529	1	0.176851	0.163949
GOTERM_BP_FAT	GO:0042104~positive regulation of activated T cell proliferation	5	0.633714	0.0201793	TMIGD2, IL23A, IGF2, CD24, SLAMF1	655	27	16650	4.70738	1	0.178063	0.165072
GOTERM_BP_FAT	GO:0098901~regulation of cardiac muscle cell action potential	5	0.633714	0.0201793	DSP, RYR2, JUP, ANK2, FGF13	655	27	16650	4.70738	1	0.178063	0.165072
GOTERM_BP_FAT	GO:0002526~acute inflammatory response	12	1.52091	0.0201929	SPN, ADCYAP1, IL22, SUSD4, IL31RA, C3AR1, NLRP3, CCR7, PPARG, PTGS2, IL6R, KLKB1	655	138	16650	2.21042	1	0.178063	0.165072
GOTERM_BP_FAT	GO:0002703~regulation of leukocyte mediated immunity	13	1.64766	0.0202085	CD300A, IL13, GAB2, GATA2, SPN, FGR, IL23A, CLCF1, SUSD4, F2RL1, XCL1, NLRP3, SLAMF1	655	156	16650	2.11832	1	0.178063	0.165072
GOTERM_BP_FAT	GO:0051224~negative regulation of protein transport	15	1.90114	0.020298	SRGN, ANXA1, ANGPT1, IL1R2, TNFRSF9, DAB2IP, UBE2J1, PPP3CA, MXI1, DACT3, F2RL1, NLRP3, IL36RN, SOX4, SLAMF1	655	193	16650	1.97564	1	0.178571	0.165543
GOTERM_BP_FAT	GO:0019933~cAMP-mediated signaling	7	0.887199	0.020348	ADCYAP1, CXCL10, CXCL9, PTGIR, PDE4D, ADM, ADCY1	655	55	16650	3.23525	1	0.178571	0.165543
GOTERM_BP_FAT	GO:1902041~regulation of extrinsic apoptotic signaling pathway via death domain receptors	7	0.887199	0.020348	CASP8, TNFSF10, TMC8, FASLG, TNFRSF10A, THBS1, ATF3	655	55	16650	3.23525	1	0.178571	0.165543
GOTERM_BP_FAT	GO:1904589~regulation of protein import	14	1.7744	0.0208098	JUP, ANGPT1, DAB2IP, PTGS2, GLI3, PPP3CA, DAB2, IL23A, BAMBI, MXI1, TLR9, DACT3, NLRP3, ZNF268	655	175	16650	2.03359	1	0.181795	0.168531
GOTERM_BP_FAT	GO:0034764~positive regulation of transmembrane transport	11	1.39417	0.0208515	RYR2, CXCL10, CXCL9, CD19, IL13, XCL1, AKAP7, ANK2, ATP1B1, NTSR1, SNCA	655	121	16650	2.3109	1	0.181795	0.168531
GOTERM_BP_FAT	GO:0044070~regulation of anion transport	9	1.14068	0.0208822	REPIN1, ADORA2A, CYP4F2, ANO9, STC1, SLC38A3, THBS1, NTSR1, SNCA	655	87	16650	2.62964	1	0.181795	0.168531
GOTERM_BP_FAT	GO:0048144~fibroblast proliferation	9	1.14068	0.0208822	JUN, CD300A, FTH1, PDGFC, IL13, DAB2IP, PDGFB, PPARG, FOSL2	655	87	16650	2.62964	1	0.181795	0.168531
GOTERM_BP_FAT	GO:0007044~cell-substrate junction assembly	9	1.14068	0.0208822	COL17A1, LAMA5, MMP14, PTPRJ, ITGA6, THBS1, PHLDB2, FERMT2, VEGFA	655	87	16650	2.62964	1	0.181795	0.168531
GOTERM_BP_FAT	GO:0030816~positive regulation of cAMP metabolic process	9	1.14068	0.0208822	ADCYAP1, CXCL10, CXCL9, PTGIR, ADORA2A, AVPR2, ADM, ADCY1, TSHR	655	87	16650	2.62964	1	0.181795	0.168531
GOTERM_BP_FAT	GO:0002275~myeloid cell activation involved in immune response	8	1.01394	0.0211667	LAT2, FGR, CD300A, IL13, F2RL1, GAB2, GATA2, SLAMF1	655	71	16650	2.86421	1	0.183184	0.169819
GOTERM_BP_FAT	GO:0071260~cellular response to mechanical stimulus	8	1.01394	0.0211667	HDAC4, CASP8, GADD45A, IL13, CASP1, TNFRSF10A, PTGS2, TNFRSF1A	655	71	16650	2.86421	1	0.183184	0.169819
GOTERM_BP_FAT	GO:0030104~water homeostasis	8	1.01394	0.0211667	CYP4F2, SCNN1A, KRT1, AVPR2, NEDD4L, ADCY1, CYP4F12, CLDN1	655	71	16650	2.86421	1	0.183184	0.169819
GOTERM_BP_FAT	GO:0099643~signal release from synapse	12	1.52091	0.0211819	STX1B, BRSK1, CHRNA3, UNC13A, SLC32A1, ADORA2A, GAD1, OTOF, C2CD4C, SYN2, SYTL3, SNCA	655	139	16650	2.19452	1	0.183184	0.169819
GOTERM_BP_FAT	GO:0007269~neurotransmitter secretion	12	1.52091	0.0211819	STX1B, BRSK1, CHRNA3, UNC13A, SLC32A1, ADORA2A, GAD1, OTOF, C2CD4C, SYN2, SYTL3, SNCA	655	139	16650	2.19452	1	0.183184	0.169819
GOTERM_BP_FAT	GO:0002886~regulation of myeloid leukocyte mediated immunity	6	0.760456	0.0214665	FGR, CD300A, IL13, F2RL1, GAB2, GATA2	655	41	16650	3.71998	1	0.185401	0.171874
GOTERM_BP_FAT	GO:0051091~positive regulation of sequence-specific DNA binding transcription factor activity	17	2.15463	0.0215646	FOXA1, HDAC4, JUP, KDM1A, HMGA2, ARID5B, ESR2, VEGFA, PPP3CA, AIM2, ZIC2, IRAK2, TLR9, NLRP3, PRKCQ, PPARG, RAB7B	655	233	16650	1.85467	1	0.186002	0.172432
GOTERM_BP_FAT	GO:0017157~regulation of exocytosis	14	1.7744	0.0216957	RAB3B, ANXA1, CD300A, IL13, C2CD4C, GAB2, GATA2, SYTL3, FGR, CACNA1I, STX1B, NCS1, F2RL1, SNCA	655	176	16650	2.02203	1	0.186886	0.173251
GOTERM_BP_FAT	GO:0006869~lipid transport	21	2.6616	0.0218191	NUS1, ANXA1, CYP4F2, PTCH1, APOBR, ANO9, ATP10A, INHBA, ATP11A, RETN, THBS1, APOLD1, REPIN1, SLCO3A1, LIPG, PPARG, LDLRAP1, APOL1, PLTP, NTSR1, ATP9A	655	312	16650	1.71095	1	0.187455	0.173779
GOTERM_BP_FAT	GO:0048511~rhythmic process	21	2.6616	0.0218191	JUN, MAGEL2, ANXA1, CSF2, RORC, INHBA, ADCY1, RORB, RETN, ENOX1, VEGFA, ADCYAP1, MMP14, PER3, ADORA2A, SIX3, ID1, KLF9, ID3, PPARG, SLIT2	655	312	16650	1.71095	1	0.187455	0.173779
GOTERM_BP_FAT	GO:0051250~negative regulation of lymphocyte activation	11	1.39417	0.0219462	SPN, HLA-DRB5, ANXA1, ADORA2A, CD300A, DTX1, XCL1, NRARP, INHBA, PAG1, GLI3	655	122	16650	2.29195	1	0.188277	0.174541
GOTERM_BP_FAT	GO:0046822~regulation of nucleocytoplasmic transport	16	2.02788	0.0220059	JUP, ANGPT1, DAB2IP, PTGS2, PTPN14, GLI3, PPP3CA, DAB2, IL23A, BAMBI, MXI1, TLR9, DACT3, NLRP3, ZNF268, SOX4	655	214	16650	1.90055	1	0.188277	0.174541
GOTERM_BP_FAT	GO:0045576~mast cell activation	7	0.887199	0.0220588	LAT2, FGR, CD300A, IL13, CD48, GAB2, GATA2	655	56	16650	3.17748	1	0.188277	0.174541
GOTERM_BP_FAT	GO:0048247~lymphocyte chemotaxis	7	0.887199	0.0220588	CXCL10, CCL22, CCL3L1, CCL20, CCL4L2, XCL2, XCL1	655	56	16650	3.17748	1	0.188277	0.174541
GOTERM_BP_FAT	GO:1901616~organic hydroxy compound catabolic process	7	0.887199	0.0220588	INPP5A, ALDH2, CYP4F2, SORD, DBH, CYP4F12, NTSR1	655	56	16650	3.17748	1	0.188277	0.174541
GOTERM_BP_FAT	GO:1902106~negative regulation of leukocyte differentiation	9	1.14068	0.0222101	ANXA1, ZBTB46, DTX1, NRARP, INHBA, GATA2, TRIB1, ZFPM1, GLI3	655	88	16650	2.59976	1	0.189075	0.17528
GOTERM_BP_FAT	GO:0048145~regulation of fibroblast proliferation	9	1.14068	0.0222101	JUN, CD300A, FTH1, PDGFC, IL13, DAB2IP, PDGFB, PPARG, FOSL2	655	88	16650	2.59976	1	0.189075	0.17528
GOTERM_BP_FAT	GO:0009792~embryo development ending in birth or egg hatching	34	4.30925	0.0223641	FOXA1, RARG, CSF2, KDM1A, EPAS1, LEF1, PDGFB, NRARP, ADM, PCDH12, GATA2, GLI3, CASP8, BCL2L11, RDH10, MYO18B, SOX4, CTHRC1, EOMES, VASP, TBX1, ARNT2, MEF2C, ANGPT1, PTCH1, LIF, PAX2, KLF2, VEGFA, XAB2, MMP14, ALDH1A2, HOXB3, PLXNB2	655	583	16650	1.48246	1	0.190139	0.176266
GOTERM_BP_FAT	GO:0044708~single-organism behavior	25	3.16857	0.0229616	CHRNA3, DBH, ADCY1, PTGS2, THBS1, SLC8A2, AFF2, EPS8, PREX2, NETO1, MDK, NTSR1, SNCA, JUN, MEF2C, ZFHX2, LSAMP, KCNAB1, TSHR, SDK1, ADCYAP1, ADORA2A, GLRB, FGF13, SGK1	655	395	16650	1.60885	1	0.194965	0.180741
GOTERM_BP_FAT	GO:0071711~basement membrane organization	4	0.506971	0.0230547	FLRT2, COL4A1, NID1, PHLDB2	655	16	16650	6.35496	1	0.194996	0.180769
GOTERM_BP_FAT	GO:0043369~CD4-positive or CD8-positive, alpha-beta T cell lineage commitment	4	0.506971	0.0230547	IL23A, ZFPM1, LY9, BATF	655	16	16650	6.35496	1	0.194996	0.180769
GOTERM_BP_FAT	GO:0045072~regulation of interferon-gamma biosynthetic process	4	0.506971	0.0230547	EBI3, TLR9, INHBA, ZFPM1	655	16	16650	6.35496	1	0.194996	0.180769
GOTERM_BP_FAT	GO:0002705~positive regulation of leukocyte mediated immunity	9	1.14068	0.0235965	FGR, IL23A, CLCF1, IL13, NLRP3, F2RL1, XCL1, GAB2, GATA2	655	89	16650	2.57055	1	0.198731	0.184232
GOTERM_BP_FAT	GO:0043300~regulation of leukocyte degranulation	6	0.760456	0.0236051	FGR, CD300A, IL13, F2RL1, GAB2, GATA2	655	42	16650	3.63141	1	0.198731	0.184232
GOTERM_BP_FAT	GO:0002448~mast cell mediated immunity	6	0.760456	0.0236051	LAT2, FGR, CD300A, IL13, GAB2, GATA2	655	42	16650	3.63141	1	0.198731	0.184232
GOTERM_BP_FAT	GO:0050709~negative regulation of protein secretion	10	1.26743	0.0236179	SRGN, PPP3CA, ANXA1, ANGPT1, TNFRSF9, IL1R2, NLRP3, F2RL1, IL36RN, SLAMF1	655	106	16650	2.3981	1	0.198731	0.184232
GOTERM_BP_FAT	GO:0023061~signal release	26	3.29531	0.0236528	BRSK1, CHRNA3, ITPR1, ADM, RETN, C2CD4C, PPP3CA, OTOF, CGA, SOX4, SNCA, HLA-DRB5, ANXA1, UNC13A, SLC32A1, GAD1, LIF, HMGA2, INHBA, MAFA, SYN2, ADRA2B, SYTL3, STX1B, ADCYAP1, ADORA2A	655	417	16650	1.58493	1	0.198769	0.184267
GOTERM_BP_FAT	GO:0045685~regulation of glial cell differentiation	7	0.887199	0.023864	TENM4, BIN1, CLCF1, LIF, HMGA2, CXCR4, PPARG	655	57	16650	3.12174	1	0.199517	0.184961
GOTERM_BP_FAT	GO:0007045~cell-substrate adherens junction assembly	7	0.887199	0.023864	LAMA5, MMP14, PTPRJ, THBS1, PHLDB2, FERMT2, VEGFA	655	57	16650	3.12174	1	0.199517	0.184961
GOTERM_BP_FAT	GO:0014909~smooth muscle cell migration	7	0.887199	0.023864	HDAC4, DOCK5, PLAU, PDGFB, SLIT2, RETN, TRIB1	655	57	16650	3.12174	1	0.199517	0.184961
GOTERM_BP_FAT	GO:0048041~focal adhesion assembly	7	0.887199	0.023864	LAMA5, MMP14, PTPRJ, THBS1, PHLDB2, FERMT2, VEGFA	655	57	16650	3.12174	1	0.199517	0.184961
GOTERM_BP_FAT	GO:0016485~protein processing	17	2.15463	0.0241477	SRGN, CCBE1, IL1R2, PTCH1, THBS1, GLI3, MMP14, CASP8, ASTL, PERP, CASP1, C3AR1, SUSD4, CHAC1, UQCRC2, CGA, KLKB1	655	236	16650	1.83109	1	0.201375	0.186683
GOTERM_BP_FAT	GO:0021700~developmental maturation	17	2.15463	0.0241477	FOXA1, UNC13A, KDM1A, EPAS1, DAB2IP, GATA2, PAX2, KLF2, NFATC4, VEGFA, NPPC, ALDH1A2, SIX3, LHX6, RAC3, PPARG, AGRN	655	236	16650	1.83109	1	0.201375	0.186683
GOTERM_BP_FAT	GO:0006469~negative regulation of protein kinase activity	17	2.15463	0.0248021	DUSP4, CDKN1B, CDKN2C, GADD45A, CD300A, DAB2IP, PTPRJ, PPM1E, DUSP9, SOCS1, RGS3, ADORA2A, FLRT2, SH3BP5, SPRY2, TRIB1, TRIB2	655	237	16650	1.82336	1	0.206568	0.191497
GOTERM_BP_FAT	GO:0030801~positive regulation of cyclic nucleotide metabolic process	10	1.26743	0.024925	NPPC, ADCYAP1, CXCL10, CXCL9, PTGIR, ADORA2A, AVPR2, ADM, ADCY1, TSHR	655	107	16650	2.37569	1	0.207065	0.191958
GOTERM_BP_FAT	GO:0002576~platelet degranulation	10	1.26743	0.024925	SRGN, SELP, PLEK, PDGFB, IGF2, CD9, PLG, THBS1, F5, VEGFA	655	107	16650	2.37569	1	0.207065	0.191958
GOTERM_BP_FAT	GO:0008585~female gonad development	9	1.14068	0.0250425	ADCYAP1, MMP14, WT1, ARID5B, COL9A3, INHBA, SLIT2, RETN, VEGFA	655	90	16650	2.54198	1	0.207777	0.192618
GOTERM_BP_FAT	GO:0034341~response to interferon-gamma	13	1.64766	0.0251373	HLA-DRB5, CCL22, CCL3L1, CCL20, CCL4L2, NLRC5, MID1, SOCS1, KYNU, XCL2, XCL1, PPARG, SNCA	655	161	16650	2.05253	1	0.208035	0.192857
GOTERM_BP_FAT	GO:0048639~positive regulation of developmental growth	13	1.64766	0.0251373	BMP10, MEF2C, UNC13A, BCL11A, HMGA2, NEDD4L, RASAL1, L1CAM, TSHR, VEGFA, CDH4, WT1, AGRN	655	161	16650	2.05253	1	0.208035	0.192857
GOTERM_BP_FAT	GO:0072073~kidney epithelium development	12	1.52091	0.0254957	LAMA5, MEF2C, ARG2, WT1, PTCH1, LIF, KLHL3, SLIT2, CD24, GLI3, PAX2, VEGFA	655	143	16650	2.13313	1	0.210468	0.195113
GOTERM_BP_FAT	GO:0051384~response to glucocorticoid	12	1.52091	0.0254957	ADCYAP1, IL22, ANXA1, MDK, KLF9, STC1, ADM, SLIT2, AGXT, PTGS2, SSTR3, FOXO1	655	143	16650	2.13313	1	0.210468	0.195113
GOTERM_BP_FAT	GO:0043030~regulation of macrophage activation	5	0.633714	0.0256843	IL13, IL31RA, THBS1, CD200, SNCA	655	29	16650	4.38273	1	0.211491	0.196061
GOTERM_BP_FAT	GO:0045909~positive regulation of vasodilation	5	0.633714	0.0256843	NPPC, ADCYAP1, EPHX2, F2RL1, ADM	655	29	16650	4.38273	1	0.211491	0.196061
GOTERM_BP_FAT	GO:0050798~activated T cell proliferation	6	0.760456	0.0258764	TMIGD2, SATB1, IL23A, IGF2, CD24, SLAMF1	655	43	16650	3.54696	1	0.212271	0.196784
GOTERM_BP_FAT	GO:1903307~positive regulation of regulated secretory pathway	6	0.760456	0.0258764	FGR, CACNA1I, IL13, F2RL1, GAB2, GATA2	655	43	16650	3.54696	1	0.212271	0.196784
GOTERM_BP_FAT	GO:0001960~negative regulation of cytokine-mediated signaling pathway	6	0.760456	0.0258764	IL1R2, NLRC5, F2RL1, PPARG, IL36RN, SLIT2	655	43	16650	3.54696	1	0.212271	0.196784
GOTERM_BP_FAT	GO:0031347~regulation of defense response	38	4.81622	0.0265417	CCL3L1, CCL4L2, GFI1, NLRC5, PTGS2, SPN, IL1RL2, CASP8, SOCS1, IRAK2, CASP1, C3AR1, SUSD4, NLRP3, CCR7, MEF2C, ANXA1, IL1R1, IL1R2, KRT1, DAB2IP, PARP9, TNFRSF1A, FGR, CLEC4A, ADCYAP1, AIM2, ADORA2A, IL23A, MAPKAPK2, TLR9, XCL2, F2RL1, XCL1, PPARG, RAB7B, KLKB1, MGLL	655	676	16650	1.42893	1	0.217246	0.201396
GOTERM_BP_FAT	GO:0000079~regulation of cyclin-dependent protein serine/threonine kinase activity	9	1.14068	0.0265493	CCND3, PSRC1, CDKN1B, CDKN2C, CCND2, GADD45A, DAB2IP, PDGFB, PIM1	655	91	16650	2.51405	1	0.217246	0.201396
GOTERM_BP_FAT	GO:0051346~negative regulation of hydrolase activity	25	3.16857	0.0267669	CSTA, LEF1, CST7, THBS1, CASP8, SLIT2, RAG1, SNCA, TMEM132D, SPINK2, ANXA1, GZMA, DAB2IP, CRIM1, PAX2, VEGFA, CAMSAP3, ADCYAP1, ADORA2A, COL7A1, TLR9, SPRY2, SERPINI1, PI16, CPEB2	655	401	16650	1.58478	1	0.218752	0.202793
GOTERM_BP_FAT	GO:0043254~regulation of protein complex assembly	24	3.04183	0.027123	VASP, SPTBN5, JUN, MAGEL2, CDKN1B, CSF2, BCL11A, PLEK, DAB2IP, C15ORF62, TMC8, ARHGAP18, VEGFA, SELP, EPS8, STX1B, BCL2L11, AIM2, PSRC1, FSCN1, SPIRE1, CCR7, SLIT2, SNCA	655	381	16650	1.60125	1	0.22033	0.204255
GOTERM_BP_FAT	GO:0048545~response to steroid hormone	24	3.04183	0.027123	FOXA1, IL22, RARG, ANXA1, LEF1, RORC, HMGA2, STC1, ADM, RORB, PTGS2, SSTR3, THBS1, FOXO1, ESR2, ADCYAP1, DAB2, GJB2, MDK, KLF9, TXNIP, PPARG, SLIT2, AGXT	655	381	16650	1.60125	1	0.22033	0.204255
GOTERM_BP_FAT	GO:0001977~renal system process involved in regulation of blood volume	4	0.506971	0.0271958	CYP4F2, PDGFB, F2RL1, CYP4F12	655	17	16650	5.98114	1	0.22033	0.204255
GOTERM_BP_FAT	GO:2001269~positive regulation of cysteine-type endopeptidase activity involved in apoptotic signaling pathway	4	0.506971	0.0271958	CASP8, TNFSF10, FASLG, TNFRSF10A	655	17	16650	5.98114	1	0.22033	0.204255
GOTERM_BP_FAT	GO:0042095~interferon-gamma biosynthetic process	4	0.506971	0.0271958	EBI3, TLR9, INHBA, ZFPM1	655	17	16650	5.98114	1	0.22033	0.204255
GOTERM_BP_FAT	GO:0042510~regulation of tyrosine phosphorylation of Stat1 protein	4	0.506971	0.0271958	SOCS1, IL23A, LIF, TNFRSF1A	655	17	16650	5.98114	1	0.22033	0.204255
GOTERM_BP_FAT	GO:0033005~positive regulation of mast cell activation	4	0.506971	0.0271958	FGR, IL13, GAB2, GATA2	655	17	16650	5.98114	1	0.22033	0.204255
GOTERM_BP_FAT	GO:0032635~interleukin-6 production	10	1.26743	0.0276918	ADCYAP1, IL1RL2, IL36B, TLR9, F2RL1, IL36RN, RAB7B, IL6R, KLF2, SLAMF1	655	109	16650	2.3321	1	0.223832	0.207501
GOTERM_BP_FAT	GO:0050678~regulation of epithelial cell proliferation	20	2.53485	0.0277334	TBX1, JUN, MEF2C, CDKN1B, ANGPT1, IL26, PTCH1, DAB2IP, PDGFB, HTR2B, HMGA2, NRARP, RUNX3, THBS1, PAX2, VEGFA, EPB41L4B, ALDH1A2, ID1, KLF9	655	300	16650	1.69466	1	0.223832	0.207501
GOTERM_BP_FAT	GO:0021879~forebrain neuron differentiation	7	0.887199	0.027765	LEF1, SLIT1, LHX6, RAC3, INHBA, SLIT2, GATA2	655	59	16650	3.01591	1	0.223832	0.207501
GOTERM_BP_FAT	GO:0019229~regulation of vasoconstriction	7	0.887199	0.027765	DOCK5, AVPR2, KCNMB4, ADM, DBH, PTGS2, ADRA2B	655	59	16650	3.01591	1	0.223832	0.207501
GOTERM_BP_FAT	GO:1904029~regulation of cyclin-dependent protein kinase activity	9	1.14068	0.028118	CCND3, PSRC1, CDKN1B, CDKN2C, CCND2, GADD45A, DAB2IP, PDGFB, PIM1	655	92	16650	2.48672	1	0.226399	0.209881
GOTERM_BP_FAT	GO:0036462~TRAIL-activated apoptotic signaling pathway	3	0.380228	0.0283691	CASP8, TNFRSF10A, ATF3	655	7	16650	10.8942	1	0.226468	0.209945
GOTERM_BP_FAT	GO:0048007~antigen processing and presentation, exogenous lipid antigen via MHC class Ib	3	0.380228	0.0283691	AP3B1, CD1C, CD1A	655	7	16650	10.8942	1	0.226468	0.209945
GOTERM_BP_FAT	GO:0090050~positive regulation of cell migration involved in sprouting angiogenesis	3	0.380228	0.0283691	PTGS2, HDAC9, VEGFA	655	7	16650	10.8942	1	0.226468	0.209945
GOTERM_BP_FAT	GO:2000318~positive regulation of T-helper 17 type immune response	3	0.380228	0.0283691	IL23A, NLRP3, PRKCQ	655	7	16650	10.8942	1	0.226468	0.209945
GOTERM_BP_FAT	GO:0045650~negative regulation of macrophage differentiation	3	0.380228	0.0283691	ZBTB46, INHBA, GATA2	655	7	16650	10.8942	1	0.226468	0.209945
GOTERM_BP_FAT	GO:0032650~regulation of interleukin-1 alpha production	3	0.380228	0.0283691	CCL20, IL1R2, CASP1	655	7	16650	10.8942	1	0.226468	0.209945
GOTERM_BP_FAT	GO:0048003~antigen processing and presentation of lipid antigen via MHC class Ib	3	0.380228	0.0283691	AP3B1, CD1C, CD1A	655	7	16650	10.8942	1	0.226468	0.209945
GOTERM_BP_FAT	GO:0010770~positive regulation of cell morphogenesis involved in differentiation	13	1.64766	0.0284875	DOCK5, BCL11A, LEF1, LIF, L1CAM, PAX2, VEGFA, DAB2, CDH4, BAMBI, PLXNB2, RAC3, SLIT2	655	164	16650	2.01499	1	0.227135	0.210564
GOTERM_BP_FAT	GO:0080134~regulation of response to stress	65	8.23828	0.0286421	BMP10, KDM1A, IL26, CCL4L2, GFI1, PLEK, HK2, PTPRF, SPN, PPP3CA, RASSF2, CASP8, PLAU, CREB3L1, CASP1, C3AR1, CCR7, PDE8A, MAP3K4, MEF2C, ANXA1, IL1R1, IL1R2, KRT1, PARP9, MID1, TNFRSF1A, CLEC4A, FGR, ADCYAP1, AIM2, ADORA2A, IL23A, MAPKAPK2, XCL2, TLR9, XCL1, PRKCQ, PPARG, RAB7B, PHLDB2, MGLL, CCL3L1, PDGFB, NLRC5, PLG, PTGS2, THBS1, FOXO1, UBE2J1, IL1RL2, BCL2L11, SOCS1, IRAK2, SUSD4, NLRP3, SLAM…	655	1285	16650	1.28583	1	0.22809	0.211449
GOTERM_BP_FAT	GO:0032673~regulation of interleukin-4 production	5	0.633714	0.0287426	HLA-DRB5, LEF1, NLRP3, PRKCQ, ZFPM1	655	30	16650	4.23664	1	0.228612	0.211933
GOTERM_BP_FAT	GO:0051403~stress-activated MAPK cascade	17	2.15463	0.0293196	GADD45A, IL26, DAB2IP, MID1, DUSP9, FOXO1, VEGFA, RASSF2, IRAK2, MAPKAPK2, TLR9, F2RL1, MAP3K8, CCR7, TRIB1, MAP3K4, SLAMF1	655	242	16650	1.78569	1	0.232918	0.215925
GOTERM_BP_FAT	GO:0002819~regulation of adaptive immune response	11	1.39417	0.0294049	SPN, MEF2C, ANXA1, IL23A, CLCF1, SUSD4, NLRP3, XCL1, CD48, PRKCQ, SLAMF1	655	128	16650	2.18452	1	0.233312	0.21629
GOTERM_BP_FAT	GO:0072088~nephron epithelium morphogenesis	8	1.01394	0.0294839	LAMA5, WT1, PTCH1, LIF, KLHL3, GLI3, PAX2, VEGFA	655	76	16650	2.67577	1	0.233656	0.216609
GOTERM_BP_FAT	GO:0006820~anion transport	28	3.5488	0.0295467	GABRB3, GABRB2, SLC23A1, SLC1A4, SLC2A3, THBS1, REPIN1, CA9, APOL1, SLC38A3, GABRD, SLC12A7, NTSR1, SNCA, SLC6A19, ANXA1, SLC32A1, ABCC5, CYP4F2, ANO9, SLC16A13, ADORA2A, SLCO3A1, GLRB, SLCO4C1, PPARG, AGXT, SLC22A20	655	468	16650	1.52085	1	0.233869	0.216807
GOTERM_BP_FAT	GO:0061045~negative regulation of wound healing	7	0.887199	0.0298644	PLAU, KRT1, PDGFB, PLG, THBS1, PHLDB2, KLKB1	655	60	16650	2.96565	1	0.235813	0.218609
GOTERM_BP_FAT	GO:0050891~multicellular organismal water homeostasis	7	0.887199	0.0298644	CYP4F2, SCNN1A, KRT1, AVPR2, ADCY1, CYP4F12, CLDN1	655	60	16650	2.96565	1	0.235813	0.218609
GOTERM_BP_FAT	GO:0007411~axon guidance	16	2.02788	0.0299144	VASP, SPTBN5, L1CAM, GLI3, VEGFA, CDH4, EFNA3, EFNA2, FLRT2, GPC1, SLIT1, PLXNB2, PRKCQ, SLIT2, PLXNC1, PLXNA4	655	223	16650	1.82385	1	0.235923	0.218711
GOTERM_BP_FAT	GO:0010035~response to inorganic substance	28	3.5488	0.0302209	RYR2, CDKN1B, CSF2, NEDD4L, ADCY1, PTGS2, THBS1, FOXO1, PPP3CA, CASP8, KCNMB4, CCR7, PDE8A, SNCA, JUN, SLC14A2, MEF2C, ANXA1, TXNRD1, PTCH1, GSS, SORD, PAX2, KLF2, RHOB, NFATC4, TXNIP, CD9	655	469	16650	1.5176	1	0.238053	0.220685
GOTERM_BP_FAT	GO:0097485~neuron projection guidance	16	2.02788	0.0304175	VASP, SPTBN5, L1CAM, GLI3, VEGFA, CDH4, EFNA3, EFNA2, FLRT2, GPC1, SLIT1, PLXNB2, PRKCQ, SLIT2, PLXNC1, PLXNA4	655	224	16650	1.8157	1	0.239313	0.221853
GOTERM_BP_FAT	GO:0072009~nephron epithelium development	10	1.26743	0.0306678	LAMA5, MEF2C, WT1, PTCH1, LIF, KLHL3, CD24, GLI3, PAX2, VEGFA	655	111	16650	2.29008	1	0.240504	0.222957
GOTERM_BP_FAT	GO:1904950~negative regulation of establishment of protein localization	15	1.90114	0.0307657	SRGN, ANXA1, ANGPT1, IL1R2, TNFRSF9, DAB2IP, UBE2J1, PPP3CA, MXI1, DACT3, F2RL1, NLRP3, IL36RN, SOX4, SLAMF1	655	204	16650	1.86911	1	0.240504	0.222957
GOTERM_BP_FAT	GO:0061351~neural precursor cell proliferation	11	1.39417	0.0308034	ADCYAP1, KDM1A, CDH2, SIX3, LEF1, PLXNB2, HMGA2, GATA2, FGF13, GLI3, VEGFA	655	129	16650	2.16758	1	0.240504	0.222957
GOTERM_BP_FAT	GO:0021983~pituitary gland development	6	0.760456	0.0308263	ADCYAP1, KDM1A, ALDH1A2, SIX3, HMGA2, GATA2	655	45	16650	3.38931	1	0.240504	0.222957
GOTERM_BP_FAT	GO:0035987~endodermal cell differentiation	6	0.760456	0.0308263	EOMES, MMP14, COL7A1, HMGA2, INHBA, MMP8	655	45	16650	3.38931	1	0.240504	0.222957
GOTERM_BP_FAT	GO:0032653~regulation of interleukin-10 production	6	0.760456	0.0308263	HLA-DRB5, IL23A, TNFRSF9, TLR9, XCL1, TRIB2	655	45	16650	3.38931	1	0.240504	0.222957
GOTERM_BP_FAT	GO:0060119~inner ear receptor cell development	6	0.760456	0.0308263	GABRB3, GABRB2, ATP2B2, MYO7A, TSHR, CTHRC1	655	45	16650	3.38931	1	0.240504	0.222957
GOTERM_BP_FAT	GO:0051147~regulation of muscle cell differentiation	13	1.64766	0.0308936	TBX1, HDAC4, BMP10, MEF2C, CXCL9, PDGFB, HDAC9, CXCL10, MMP14, OLFM2, CDH2, RBPMS2, ID3	655	166	16650	1.99071	1	0.240741	0.223177
GOTERM_BP_FAT	GO:2000177~regulation of neural precursor cell proliferation	8	1.01394	0.0313781	ADCYAP1, KDM1A, CDH2, SIX3, GATA2, GLI3, FOXO1, VEGFA	655	77	16650	2.64102	1	0.244168	0.226354
GOTERM_BP_FAT	GO:0046545~development of primary female sexual characteristics	9	1.14068	0.0314453	ADCYAP1, MMP14, WT1, ARID5B, COL9A3, INHBA, SLIT2, RETN, VEGFA	655	94	16650	2.43382	1	0.244168	0.226354
GOTERM_BP_FAT	GO:0060993~kidney morphogenesis	9	1.14068	0.0314453	LAMA5, WT1, PTCH1, LIF, KLHL3, GLI3, SOX4, PAX2, VEGFA	655	94	16650	2.43382	1	0.244168	0.226354
GOTERM_BP_FAT	GO:0032288~myelin assembly	4	0.506971	0.0317053	TENM4, GPC1, CD9, ANK2	655	18	16650	5.64885	1	0.245023	0.227147
GOTERM_BP_FAT	GO:0070233~negative regulation of T cell apoptotic process	4	0.506971	0.0317053	TSC22D3, RORC, PRKCQ, RAG1	655	18	16650	5.64885	1	0.245023	0.227147
GOTERM_BP_FAT	GO:0045117~azole transport	4	0.506971	0.0317053	ADCYAP1, CSF2, SLC38A3, SLC19A2	655	18	16650	5.64885	1	0.245023	0.227147
GOTERM_BP_FAT	GO:0070498~interleukin-1-mediated signaling pathway	4	0.506971	0.0317053	IL1RL2, IL1R1, IRAK2, IL1R2	655	18	16650	5.64885	1	0.245023	0.227147
GOTERM_BP_FAT	GO:0050769~positive regulation of neurogenesis	24	3.04183	0.0318451	FOXA1, MEF2C, UNC13A, KDM1A, TENM4, BCL11A, DAB2IP, LIF, CXCR4, NEDD4L, RASAL1, GATA2, L1CAM, ADRA2B, ETV5, GLI3, VEGFA, ADCYAP1, CDH4, BIN1, CLCF1, PLXNB2, PPARG, SLIT2	655	387	16650	1.57642	1	0.245813	0.227879
GOTERM_BP_FAT	GO:0019835~cytolysis	5	0.633714	0.0320078	CSF2, GZMA, PRF1, APOL1, PAX2	655	31	16650	4.09998	1	0.246777	0.228773
GOTERM_BP_FAT	GO:0014031~mesenchymal cell development	13	1.64766	0.0321499	EOMES, FOXA1, TBX1, LAMA5, LEF1, DAB2IP, HTR2B, HMGA2, DAB2, BAMBI, RDH10, ALDH1A2, DACT3	655	167	16650	1.97879	1	0.247581	0.229518
GOTERM_BP_FAT	GO:0006024~glycosaminoglycan biosynthetic process	10	1.26743	0.0322363	ANGPT1, GPC1, ABCC5, DSE, UST, PDGFB, AGRN, ST3GAL1, HSPG2, CHST2	655	112	16650	2.26963	1	0.247954	0.229864
GOTERM_BP_FAT	GO:0072028~nephron morphogenesis	8	1.01394	0.0333521	LAMA5, WT1, PTCH1, LIF, KLHL3, GLI3, PAX2, VEGFA	655	78	16650	2.60716	1	0.256235	0.237541
GOTERM_BP_FAT	GO:1900047~negative regulation of hemostasis	6	0.760456	0.0335089	PLAU, KRT1, PDGFB, PLG, THBS1, KLKB1	655	46	16650	3.31563	1	0.256836	0.238098
GOTERM_BP_FAT	GO:0030195~negative regulation of blood coagulation	6	0.760456	0.0335089	PLAU, KRT1, PDGFB, PLG, THBS1, KLKB1	655	46	16650	3.31563	1	0.256836	0.238098
GOTERM_BP_FAT	GO:0006023~aminoglycan biosynthetic process	10	1.26743	0.0338597	ANGPT1, GPC1, ABCC5, DSE, UST, PDGFB, AGRN, ST3GAL1, HSPG2, CHST2	655	113	16650	2.24954	1	0.259221	0.240308
GOTERM_BP_FAT	GO:1901137~carbohydrate derivative biosynthetic process	41	5.19645	0.0345411	GALNT14, GPR87, HTR2B, PDGFB, ADM, LRP2, ADCY1, SLC2A4, ART5, THBS1, UBE2J1, TYMP, NPPC, GPC1, DSE, MGAT3, ST8SIA4, CCR7, TK2, ATP6V0A4, ST3GAL1, PHLDA1, GALNT9, GALNT8, NUS1, PTGIR, ANGPT1, GALNT3, ABCC5, AVPR2, SORD, HSPG2, TSHR, MUC5AC, ADCYAP1, ADORA2A, MGAT4A, UST, ADSSL1, AGRN, CHST2	655	756	16650	1.37859	1	0.264128	0.244858
GOTERM_BP_FAT	GO:1902532~negative regulation of intracellular signal transduction	27	3.42205	0.0348679	KDM1A, WWC2, PLEK, ITPR1, PTPRJ, RASAL1, THBS1, FOXO1, CASP8, SOCS1, RASSF2, RGS3, FLRT2, CREB3L1, WWC3, NLRP3, SLIT2, DUSP4, TLE1, CD300A, DAB2IP, LIF, HMGA2, DUSP9, SPRY2, F2RL1, ATF3	655	454	16650	1.51175	1	0.266316	0.246886
GOTERM_BP_FAT	GO:0001508~action potential	11	1.39417	0.0352792	DSP, RYR2, CACNA1I, JUP, KCNMB4, AKAP7, NEDD4L, ANK2, ATP1B1, FGF13, PTPN3	655	132	16650	2.11832	1	0.268183	0.248617
GOTERM_BP_FAT	GO:0002444~myeloid leukocyte mediated immunity	8	1.01394	0.0354072	LAT2, FGR, CD300A, IL13, F2RL1, GAB2, GATA2, IL6R	655	79	16650	2.57416	1	0.268183	0.248617
GOTERM_BP_FAT	GO:0002042~cell migration involved in sprouting angiogenesis	5	0.633714	0.0354815	STARD13, SLIT2, PTGS2, HDAC9, VEGFA	655	32	16650	3.97185	1	0.268183	0.248617
GOTERM_BP_FAT	GO:0033006~regulation of mast cell activation involved in immune response	5	0.633714	0.0354815	FGR, CD300A, IL13, GAB2, GATA2	655	32	16650	3.97185	1	0.268183	0.248617
GOTERM_BP_FAT	GO:0050704~regulation of interleukin-1 secretion	5	0.633714	0.0354815	AIM2, IL1R2, CASP1, NLRP3, CCR7	655	32	16650	3.97185	1	0.268183	0.248617
GOTERM_BP_FAT	GO:0042092~type 2 immune response	5	0.633714	0.0354815	ANXA1, IL31RA, NLRP3, XCL1, BATF	655	32	16650	3.97185	1	0.268183	0.248617
GOTERM_BP_FAT	GO:0001569~patterning of blood vessels	5	0.633714	0.0354815	COL4A1, LEF1, NRARP, NFATC4, VEGFA	655	32	16650	3.97185	1	0.268183	0.248617
GOTERM_BP_FAT	GO:0032633~interleukin-4 production	5	0.633714	0.0354815	ITK, LEF1, NLRP3, PRKCQ, ZFPM1	655	32	16650	3.97185	1	0.268183	0.248617
GOTERM_BP_FAT	GO:0043304~regulation of mast cell degranulation	5	0.633714	0.0354815	FGR, CD300A, IL13, GAB2, GATA2	655	32	16650	3.97185	1	0.268183	0.248617
GOTERM_BP_FAT	GO:0042129~regulation of T cell proliferation	12	1.52091	0.0359736	SPN, HLA-DRB5, TMIGD2, ANXA1, IL23A, EBI3, IGF2, XCL1, PRKCQ, CD24, ZP4, SLAMF1	655	151	16650	2.02012	1	0.271588	0.251774
GOTERM_BP_FAT	GO:0002279~mast cell activation involved in immune response	6	0.760456	0.0363322	LAT2, FGR, CD300A, IL13, GAB2, GATA2	655	47	16650	3.24509	1	0.273348	0.253405
GOTERM_BP_FAT	GO:0043392~negative regulation of DNA binding	6	0.760456	0.0363322	JUN, KDM1A, GZMA, ID1, LEF1, HMGA2	655	47	16650	3.24509	1	0.273348	0.253405
GOTERM_BP_FAT	GO:0060761~negative regulation of response to cytokine stimulus	6	0.760456	0.0363322	IL1R2, NLRC5, F2RL1, PPARG, IL36RN, SLIT2	655	47	16650	3.24509	1	0.273348	0.253405
GOTERM_BP_FAT	GO:0042534~regulation of tumor necrosis factor biosynthetic process	4	0.506971	0.03658	SPN, MAPKAPK2, THBS1, UBE2J1	655	19	16650	5.35155	1	0.273593	0.253632
GOTERM_BP_FAT	GO:0014887~cardiac muscle adaptation	4	0.506971	0.03658	HDAC4, PPP3CA, MEF2C, BMP10	655	19	16650	5.35155	1	0.273593	0.253632
GOTERM_BP_FAT	GO:0006198~cAMP catabolic process	4	0.506971	0.03658	PDE10A, PDE4D, PDE4C, PDE8A	655	19	16650	5.35155	1	0.273593	0.253632
GOTERM_BP_FAT	GO:0090049~regulation of cell migration involved in sprouting angiogenesis	4	0.506971	0.03658	STARD13, PTGS2, HDAC9, VEGFA	655	19	16650	5.35155	1	0.273593	0.253632
GOTERM_BP_FAT	GO:0070242~thymocyte apoptotic process	4	0.506971	0.03658	BCL2L11, RORC, GLI3, RAG1	655	19	16650	5.35155	1	0.273593	0.253632
GOTERM_BP_FAT	GO:0032835~glomerulus development	7	0.887199	0.0367766	MEF2C, ANGPT1, WT1, PDGFB, CD24, NID1, PAX2	655	63	16650	2.82443	1	0.273593	0.253632
GOTERM_BP_FAT	GO:0050795~regulation of behavior	7	0.887199	0.0367766	MEF2C, CSF2, PER3, ADORA2A, MDK, HTR2B, RETN	655	63	16650	2.82443	1	0.273593	0.253632
GOTERM_BP_FAT	GO:0032652~regulation of interleukin-1 production	7	0.887199	0.0367766	AIM2, ANXA1, CCL20, IL1R2, CASP1, NLRP3, CCR7	655	63	16650	2.82443	1	0.273593	0.253632
GOTERM_BP_FAT	GO:0032610~interleukin-1 alpha production	3	0.380228	0.0368544	CCL20, IL1R2, CASP1	655	8	16650	9.53244	1	0.273593	0.253632
GOTERM_BP_FAT	GO:0010534~regulation of activation of JAK2 kinase activity	3	0.380228	0.0368544	SOCS1, CD300A, IL23A	655	8	16650	9.53244	1	0.273593	0.253632
GOTERM_BP_FAT	GO:0045654~positive regulation of megakaryocyte differentiation	3	0.380228	0.0368544	KDM1A, GATA2, RAB7B	655	8	16650	9.53244	1	0.273593	0.253632
GOTERM_BP_FAT	GO:0044236~multicellular organism metabolic process	11	1.39417	0.0368668	MMP14, MMP13, COL4A1, CREB3L1, COL5A3, COL7A1, ID1, PPARG, RETN, MMP8, IL6R	655	133	16650	2.10239	1	0.273593	0.253632
GOTERM_BP_FAT	GO:0042307~positive regulation of protein import into nucleus	9	1.14068	0.0369256	PPP3CA, DAB2, JUP, IL23A, BAMBI, TLR9, PTGS2, ZNF268, GLI3	655	97	16650	2.35854	1	0.273718	0.253748
GOTERM_BP_FAT	GO:0033559~unsaturated fatty acid metabolic process	10	1.26743	0.0372737	FADS2, ANXA1, CYP4F2, EPHX2, MAPKAPK2, PTGS2, CYP4F12, MGLL, TNFRSF1A, PTGS1	655	115	16650	2.21042	1	0.275986	0.25585
GOTERM_BP_FAT	GO:0001701~in utero embryonic development	21	2.6616	0.0373256	EOMES, ARNT2, CSF2, KDM1A, ANGPT1, EPAS1, PTCH1, LEF1, PDGFB, LIF, ADM, PCDH12, GATA2, GLI3, KLF2, VEGFA, XAB2, BCL2L11, CASP8, RDH10, MYO18B	655	331	16650	1.61274	1	0.276058	0.255917
GOTERM_BP_FAT	GO:0008217~regulation of blood pressure	13	1.64766	0.0375422	EPHX2, CYP4F2, PDE4D, AVPR2, PDGFB, PTGS2, CYP4F12, ADRA2B, PTGS1, F2RL1, PPARG, SGK1, NTSR1	655	171	16650	1.9325	1	0.277048	0.256835
GOTERM_BP_FAT	GO:0072676~lymphocyte migration	8	1.01394	0.0375443	CXCL10, CCL22, CCL3L1, CCL20, CCL4L2, XCL2, XCL1, CCR7	655	80	16650	2.54198	1	0.277048	0.256835
GOTERM_BP_FAT	GO:0044087~regulation of cellular component biogenesis	43	5.44994	0.0380468	HDAC4, SPTBN5, MAGEL2, BMP10, CDKN1B, CSF2, PLEK, AMIGO2, C15ORF62, ARHGAP18, PTPRJ, THBS1, PPM1E, EPS8, BCL2L11, FLRT2, SLIT1, EPS8L2, CCR7, SLIT2, EVI5, SNCA, VASP, JUN, MEF2C, BCL11A, DAB2IP, RHOG, TMC8, SSH3, TNFRSF1A, VEGFA, SELP, STX1B, MMP14, AIM2, PSRC1, ID1, FSCN1, SPIRE1, F2RL1, AGRN, PHLDB2	655	807	16650	1.35447	1	0.28044	0.259979
GOTERM_BP_FAT	GO:0051604~protein maturation	18	2.28137	0.0387551	SRGN, CCBE1, IL1R2, PTCH1, THBS1, GLI3, TSPAN15, MMP14, CASP8, ASTL, PERP, CASP1, C3AR1, SUSD4, CHAC1, UQCRC2, CGA, KLKB1	655	271	16650	1.6884	1	0.285339	0.264521
GOTERM_BP_FAT	GO:0050808~synapse organization	16	2.02788	0.0389473	MEF2C, UNC13A, AMIGO2, DAB2IP, ATP2B2, ETV5, NFATC4, SDK1, PCDHB2, CDH2, GLRB, FLRT2, COL4A1, SLIT1, AGRN, SNCA	655	231	16650	1.76068	1	0.286218	0.265336
GOTERM_BP_FAT	GO:1902806~regulation of cell cycle G1/S phase transition	12	1.52091	0.0390058	PLK3, CDKN1B, SLFN11, ANXA1, CCND2, GADD45A, SUSD2, PIM1, TNKS1BP1, UBE2E2, MYO16, SOX4	655	153	16650	1.99371	1	0.286218	0.265336
GOTERM_BP_FAT	GO:0048469~cell maturation	12	1.52091	0.0390058	FOXA1, NPPC, KDM1A, EPAS1, SIX3, LHX6, RAC3, PPARG, GATA2, AGRN, KLF2, VEGFA	655	153	16650	1.99371	1	0.286218	0.265336
GOTERM_BP_FAT	GO:0000578~embryonic axis specification	5	0.633714	0.0391646	WT1, PTCH1, NRARP, CXXC4, HOXD8	655	33	16650	3.85149	1	0.286739	0.265819
GOTERM_BP_FAT	GO:1902742~apoptotic process involved in development	5	0.633714	0.0391646	BCL2L11, SIX3, LEF1, SLIT2, PAX2	655	33	16650	3.85149	1	0.286739	0.265819
GOTERM_BP_FAT	GO:0007626~locomotory behavior	14	1.7744	0.03997	CHRNA3, LSAMP, ATP2B2, DBH, ETV5, TSHR, EPS8, PREX2, OLFM2, ADORA2A, GLRB, MYO15A, NTSR1, SNCA	655	192	16650	1.85353	1	0.292308	0.270982
GOTERM_BP_FAT	GO:0050729~positive regulation of inflammatory response	10	1.26743	0.0409156	CCL3L1, IL23A, CCL4L2, TLR9, XCL2, XCL1, CCR7, PTGS2, KLKB1, TNFRSF1A	655	117	16650	2.17264	1	0.298224	0.276466
GOTERM_BP_FAT	GO:0002822~regulation of adaptive immune response based on somatic recombination of immune receptors built from immunoglobulin superfamily domains	10	1.26743	0.0409156	SPN, MEF2C, ANXA1, IL23A, CLCF1, SUSD4, NLRP3, XCL1, PRKCQ, SLAMF1	655	117	16650	2.17264	1	0.298224	0.276466
GOTERM_BP_FAT	GO:1904591~positive regulation of protein import	9	1.14068	0.0409157	PPP3CA, DAB2, JUP, IL23A, BAMBI, TLR9, PTGS2, ZNF268, GLI3	655	99	16650	2.3109	1	0.298224	0.276466
GOTERM_BP_FAT	GO:0002360~T cell lineage commitment	4	0.506971	0.0418149	IL23A, ZFPM1, LY9, BATF	655	20	16650	5.08397	1	0.302767	0.280678
GOTERM_BP_FAT	GO:0046697~decidualization	4	0.506971	0.0418149	GJB2, LIF, STC1, PTGS2	655	20	16650	5.08397	1	0.302767	0.280678
GOTERM_BP_FAT	GO:0043586~tongue development	4	0.506971	0.0418149	TBX1, LEF1, HOXC13, GLI3	655	20	16650	5.08397	1	0.302767	0.280678
GOTERM_BP_FAT	GO:0045624~positive regulation of T-helper cell differentiation	4	0.506971	0.0418149	ANXA1, IL23A, MYB, NLRP3	655	20	16650	5.08397	1	0.302767	0.280678
GOTERM_BP_FAT	GO:0008406~gonad development	15	1.90114	0.0418974	SPINK2, HMGA2, ARID5B, INHBA, RETN, VEGFA, ADCYAP1, MMP14, BCL2L11, WT1, RDH10, TNFSF10, COL9A3, SLIT2, CGA	655	213	16650	1.79013	1	0.302767	0.280678
GOTERM_BP_FAT	GO:0014068~positive regulation of phosphatidylinositol 3-kinase signaling	7	0.887199	0.0419095	SELP, FGR, PRR5, ANGPT1, PDGFC, PDGFB, F2RL1	655	65	16650	2.73752	1	0.302767	0.280678
GOTERM_BP_FAT	GO:0086001~cardiac muscle cell action potential	7	0.887199	0.0419095	DSP, RYR2, JUP, NEDD4L, ANK2, ATP1B1, FGF13	655	65	16650	2.73752	1	0.302767	0.280678
GOTERM_BP_FAT	GO:0042310~vasoconstriction	7	0.887199	0.0419095	DOCK5, AVPR2, HTR2B, ADM, DBH, PTGS2, ADRA2B	655	65	16650	2.73752	1	0.302767	0.280678
GOTERM_BP_FAT	GO:0032370~positive regulation of lipid transport	6	0.760456	0.0424058	CYP4F2, PTCH1, LIPG, RETN, PLTP, NTSR1	655	49	16650	3.11263	1	0.306014	0.283688
GOTERM_BP_FAT	GO:0033673~negative regulation of kinase activity	17	2.15463	0.0426146	DUSP4, CDKN1B, CDKN2C, GADD45A, CD300A, DAB2IP, PTPRJ, PPM1E, DUSP9, SOCS1, RGS3, ADORA2A, FLRT2, SH3BP5, SPRY2, TRIB1, TRIB2	655	254	16650	1.70133	1	0.306844	0.284457
GOTERM_BP_FAT	GO:0031098~stress-activated protein kinase signaling cascade	17	2.15463	0.0426146	GADD45A, IL26, DAB2IP, MID1, DUSP9, FOXO1, VEGFA, RASSF2, IRAK2, MAPKAPK2, TLR9, F2RL1, MAP3K8, CCR7, TRIB1, MAP3K4, SLAMF1	655	254	16650	1.70133	1	0.306844	0.284457
GOTERM_BP_FAT	GO:0001704~formation of primary germ layer	10	1.26743	0.0428237	EOMES, DUSP4, MMP14, TXNRD1, COL7A1, LEF1, HMGA2, INHBA, MMP8, PAX2	655	118	16650	2.15422	1	0.308011	0.285539
GOTERM_BP_FAT	GO:2000117~negative regulation of cysteine-type endopeptidase activity	9	1.14068	0.0430141	CASP8, ADORA2A, LEF1, CST7, THBS1, PAX2, RAG1, SNCA, VEGFA	655	100	16650	2.28779	1	0.308673	0.286153
GOTERM_BP_FAT	GO:0006690~icosanoid metabolic process	9	1.14068	0.0430141	ANXA1, CYP4F2, EPHX2, MAPKAPK2, PTGS2, CYP4F12, MGLL, TNFRSF1A, PTGS1	655	100	16650	2.28779	1	0.308673	0.286153
GOTERM_BP_FAT	GO:0098801~regulation of renal system process	5	0.633714	0.0430575	ADORA2A, AVPR2, PDGFB, F2RL1, STC1	655	34	16650	3.73821	1	0.308673	0.286153
GOTERM_BP_FAT	GO:0060485~mesenchyme development	16	2.02788	0.0431961	EOMES, FOXA1, TBX1, LAMA5, MEF2C, LEF1, DAB2IP, HTR2B, HMGA2, PAX2, DAB2, WT1, BAMBI, RDH10, ALDH1A2, DACT3	655	234	16650	1.73811	1	0.309327	0.286759
GOTERM_BP_FAT	GO:0051493~regulation of cytoskeleton organization	25	3.16857	0.0440931	SPTBN5, MAGEL2, BMP10, CDKN1B, PLEK, C15ORF62, ARHGAP18, PPM1E, EPS8, CAPN6, CCR7, SLIT2, SNCA, VASP, MEF2C, SSH3, MID1, CAMSAP3, PSRC1, ID1, FSCN1, SPIRE1, F2RL1, FGF13, PHLDB2	655	422	16650	1.50592	1	0.315405	0.292394
GOTERM_BP_FAT	GO:0070613~regulation of protein processing	8	1.01394	0.0444577	CCBE1, ASTL, IL1R2, SUSD4, C3AR1, CHAC1, THBS1, KLKB1	655	83	16650	2.45011	1	0.317206	0.294063
GOTERM_BP_FAT	GO:1901343~negative regulation of vasculature development	8	1.01394	0.0444577	CXCL10, STARD13, WT1, STAB1, DAB2IP, PDGFB, FASLG, THBS1	655	83	16650	2.45011	1	0.317206	0.294063
GOTERM_BP_FAT	GO:0045861~negative regulation of proteolysis	20	2.53485	0.0444903	SPINK2, CSTA, IL1R2, LEF1, CRIM1, DAB2IP, CST7, THBS1, PAX2, VEGFA, CASP8, ADORA2A, COL7A1, SUSD4, PI16, CHAC1, SERPINI1, RAG1, PTPN3, SNCA	655	317	16650	1.60378	1	0.317206	0.294063
GOTERM_BP_FAT	GO:0032755~positive regulation of interleukin-6 production	7	0.887199	0.0446366	ADCYAP1, IL1RL2, IL36B, TLR9, F2RL1, RAB7B, IL6R	655	66	16650	2.69604	1	0.317556	0.294388
GOTERM_BP_FAT	GO:0043299~leukocyte degranulation	7	0.887199	0.0446366	LAT2, FGR, CD300A, IL13, F2RL1, GAB2, GATA2	655	66	16650	2.69604	1	0.317556	0.294388
GOTERM_BP_FAT	GO:0043271~negative regulation of ion transport	10	1.26743	0.0447908	ADCYAP1, CYP4F2, TLR9, ANO9, STC1, NEDD4L, KCNAB1, PTGS2, THBS1, NTSR1	655	119	16650	2.13612	1	0.318307	0.295083
GOTERM_BP_FAT	GO:0072089~stem cell proliferation	9	1.14068	0.0451824	KDM1A, SIX3, LEF1, PLXNB2, HMGA2, FGF13, GLI3, ETV6, VEGFA	655	101	16650	2.26513	1	0.320393	0.297018
GOTERM_BP_FAT	GO:0002065~columnar/cuboidal epithelial cell differentiation	9	1.14068	0.0451824	FOXA1, RARG, CDH2, LEF1, IL13, IL31RA, ATP2B2, MYO7A, SOX4	655	101	16650	2.26513	1	0.320393	0.297018
GOTERM_BP_FAT	GO:0030036~actin cytoskeleton organization	31	3.92902	0.0455747	SPTBN5, MAGEL2, BMP10, PLEK, C15ORF62, ARHGAP18, PPM1E, EPS8, EPB41L4B, FGD4, FGD5, PLS3, RAC3, FLNB, CCR7, SLIT2, S1PR2, SPECC1, VASP, MEF2C, ANXA1, RHOG, MICAL2, CORO2A, SSH3, ID1, FSCN1, SPIRE1, F2RL1, RHOU, PHLDB2	655	553	16650	1.42498	1	0.322368	0.298849
GOTERM_BP_FAT	GO:0051172~negative regulation of nitrogen compound metabolic process	73	9.25222	0.0455991	FOXA1, RARG, CDKN1B, KDM1A, GFI1, WWC2, NRARP, FASLG, IKZF1, RORB, GLI3, IKZF4, NPPC, PPP3CA, ZIC2, SIX3, MYB, WWC3, JARID2, EOMES, HES6, MEF2C, TLE1, TSC22D3, ZBTB32, ARID5B, CBFA2T3, RUNX3, PAX2, ETV6, ZEB2, TXNIP, HOXB3, XCL1, PPARG, ZFPM1, ATF3, HDAC4, PIF1, MAGEL2, SATB1, GPR87, LEF1, PDGFB, NEDD4L, GATA2, HDAC9, FOXO1, PURB, PCBP3, MXI1, TBL1Y, ZNF268, SNCA, PLK3, JUN, BCL11A, GZMA, PTCH1, …	655	1506	16650	1.23217	1	0.322368	0.298849
GOTERM_BP_FAT	GO:0007157~heterophilic cell-cell adhesion via plasma membrane cell adhesion molecules	6	0.760456	0.0456581	SELP, CDH4, CDH2, TENM4, AMIGO2, CD200	655	50	16650	3.05038	1	0.322368	0.298849
GOTERM_BP_FAT	GO:0019369~arachidonic acid metabolic process	6	0.760456	0.0456581	CYP4F2, EPHX2, PTGS2, CYP4F12, MGLL, PTGS1	655	50	16650	3.05038	1	0.322368	0.298849
GOTERM_BP_FAT	GO:0061448~connective tissue development	16	2.02788	0.0458665	FOXA1, BMP10, MEF2C, RARG, PDGFB, RORC, HMGA2, STC1, ARID5B, RUNX3, GLI3, NPPC, MMP13, WT1, MATN1, HOXB3	655	236	16650	1.72338	1	0.322858	0.299303
GOTERM_BP_FAT	GO:0050778~positive regulation of immune response	37	4.68948	0.0458889	ITK, NLRC5, PTPRJ, GATA2, CASP8, IRAK2, CD19, MYB, C3AR1, SUSD4, NLRP3, CCR7, PAG1, MEF2C, HLA-DRB5, ANXA1, CD300A, PDE4D, KRT1, IL13, PLCL2, DAB2IP, GAB2, FGR, LAT2, CLEC4A, AIM2, IL23A, CLCF1, GCSAML, MAPKAPK2, TLR9, F2RL1, XCL1, PRKCQ, RAB7B, ZP4	655	684	16650	1.37505	1	0.322858	0.299303
GOTERM_BP_FAT	GO:0003413~chondrocyte differentiation involved in endochondral bone morphogenesis	3	0.380228	0.046172	NPPC, RARG, MATN1	655	9	16650	8.47328	1	0.322858	0.299303
GOTERM_BP_FAT	GO:0060100~positive regulation of phagocytosis, engulfment	3	0.380228	0.046172	F2RL1, PPARG, GATA2	655	9	16650	8.47328	1	0.322858	0.299303
GOTERM_BP_FAT	GO:0060872~semicircular canal development	3	0.380228	0.046172	TBX1, GATA2, GLI3	655	9	16650	8.47328	1	0.322858	0.299303
GOTERM_BP_FAT	GO:0060019~radial glial cell differentiation	3	0.380228	0.046172	CDH2, LEF1, GLI3	655	9	16650	8.47328	1	0.322858	0.299303
GOTERM_BP_FAT	GO:0035988~chondrocyte proliferation	3	0.380228	0.046172	MMP14, HMGA2, STC1	655	9	16650	8.47328	1	0.322858	0.299303
GOTERM_BP_FAT	GO:0060539~diaphragm development	3	0.380228	0.046172	WT1, KCNAB1, FGFRL1	655	9	16650	8.47328	1	0.322858	0.299303
GOTERM_BP_FAT	GO:1905155~positive regulation of membrane invagination	3	0.380228	0.046172	F2RL1, PPARG, GATA2	655	9	16650	8.47328	1	0.322858	0.299303
GOTERM_BP_FAT	GO:1903305~regulation of regulated secretory pathway	10	1.26743	0.0468173	FGR, STX1B, CACNA1I, CD300A, IL13, F2RL1, C2CD4C, GAB2, GATA2, SYTL3	655	120	16650	2.11832	1	0.327021	0.303162
GOTERM_BP_FAT	GO:0060349~bone morphogenesis	8	1.01394	0.0469323	NPPC, MEF2C, MMP14, RARG, MMP13, MATN1, STC1, GLI3	655	84	16650	2.42094	1	0.327125	0.303258
GOTERM_BP_FAT	GO:1903317~regulation of protein maturation	8	1.01394	0.0469323	CCBE1, ASTL, IL1R2, SUSD4, C3AR1, CHAC1, THBS1, KLKB1	655	84	16650	2.42094	1	0.327125	0.303258
GOTERM_BP_FAT	GO:0007249~I-kappaB kinase/NF-kappaB signaling	17	2.15463	0.0469878	TLE1, AVPR2, DAB2IP, HTR2B, FASLG, PTGS2, TNFRSF1A, CASP8, IRAK2, IL23A, CASP1, TNFSF10, TLR9, F2RL1, NLRP3, CCR7, ZNF268	655	257	16650	1.68147	1	0.327163	0.303294
GOTERM_BP_FAT	GO:0001101~response to acid chemical	18	2.28137	0.0471202	TBX1, SLC14A2, MEF2C, RARG, CDKN1B, GSS, PTCH1, RORB, PTGS2, PAX2, SOCS1, GLRB, COL4A1, ALDH1A2, PDGFC, CD9, ID3, PPARG	655	278	16650	1.64589	1	0.327318	0.303437
GOTERM_BP_FAT	GO:0032689~negative regulation of interferon-gamma production	5	0.633714	0.0471602	HLA-DRB5, XCL1, IL36RN, INHBA, SLAMF1	655	35	16650	3.63141	1	0.327318	0.303437
GOTERM_BP_FAT	GO:0009154~purine ribonucleotide catabolic process	5	0.633714	0.0471602	NUDT11, PDE10A, PDE4D, PDE4C, PDE8A	655	35	16650	3.63141	1	0.327318	0.303437
GOTERM_BP_FAT	GO:0031960~response to corticosteroid	12	1.52091	0.0473541	ADCYAP1, IL22, ANXA1, MDK, KLF9, STC1, ADM, SLIT2, AGXT, PTGS2, SSTR3, FOXO1	655	158	16650	1.93062	1	0.327849	0.30393
GOTERM_BP_FAT	GO:0097186~amelogenesis	4	0.506971	0.0474037	TBX1, PERP, ITGA6, FOXO1	655	21	16650	4.84188	1	0.327849	0.30393
GOTERM_BP_FAT	GO:0045444~fat cell differentiation	14	1.7744	0.0474291	RNASEL, HMGA2, ARID5B, TMEM64, SLC2A4, RETN, GATA2, PTGS2, FOXO1, SOCS1, ITGA6, PPARG, TRIB2, ZFPM1	655	197	16650	1.80649	1	0.327849	0.30393
GOTERM_BP_FAT	GO:0032874~positive regulation of stress-activated MAPK cascade	11	1.39417	0.0474374	RASSF2, IL26, GADD45A, DAB2IP, TLR9, F2RL1, CCR7, MID1, MAP3K4, SLAMF1, VEGFA	655	139	16650	2.01164	1	0.327849	0.30393
GOTERM_BP_FAT	GO:0043122~regulation of I-kappaB kinase/NF-kappaB signaling	16	2.02788	0.0482984	TLE1, ANGPT1, DAB2IP, HTR2B, FASLG, PTGS2, TNFRSF1A, CASP8, IL23A, CASP1, TNFSF10, TLR9, F2RL1, NLRP3, CCR7, ZNF268	655	238	16650	1.7089	1	0.333447	0.30912
GOTERM_BP_FAT	GO:0060538~skeletal muscle organ development	13	1.64766	0.0484598	EOMES, TBX1, HDAC4, MEF2C, TSC22D3, KCNAB1, HDAC9, FGFRL1, PPP3CA, WT1, GPC1, FLNB, ATF3	655	178	16650	1.85651	1	0.333616	0.309276
GOTERM_BP_FAT	GO:0045137~development of primary sexual characteristics	15	1.90114	0.0484759	SPINK2, HMGA2, ARID5B, INHBA, RETN, VEGFA, ADCYAP1, MMP14, BCL2L11, WT1, RDH10, TNFSF10, COL9A3, SLIT2, CGA	655	218	16650	1.74907	1	0.333616	0.309276
GOTERM_BP_FAT	GO:1900180~regulation of protein localization to nucleus	15	1.90114	0.0484759	JUP, ANGPT1, DAB2IP, LIF, PTGS2, GLI3, PPP3CA, DAB2, IL23A, BAMBI, MXI1, TLR9, DACT3, NLRP3, ZNF268	655	218	16650	1.74907	1	0.333616	0.309276
GOTERM_BP_FAT	GO:0008544~epidermis development	19	2.40811	0.0490073	DSP, COL17A1, LAMA5, CSTA, ANXA1, SATB1, PTCH1, TCHH, KAZN, ATP2B2, MYO7A, INHBA, HOXC13, KRT9, FOSL2, KRT17, COL7A1, TXNIP, FLNB	655	300	16650	1.60992	1	0.336539	0.311986
GOTERM_BP_FAT	GO:0048641~regulation of skeletal muscle tissue development	6	0.760456	0.0490551	TBX1, HDAC4, MEF2C, GPC1, TSC22D3, HDAC9	655	51	16650	2.99057	1	0.336539	0.311986
GOTERM_BP_FAT	GO:0046637~regulation of alpha-beta T cell differentiation	6	0.760456	0.0490551	ANXA1, IL23A, MYB, NLRP3, AP3B1, GLI3	655	51	16650	2.99057	1	0.336539	0.311986
GOTERM_BP_FAT	GO:0010876~lipid localization	21	2.6616	0.0491891	NUS1, ANXA1, CYP4F2, PTCH1, APOBR, ANO9, ATP10A, INHBA, ATP11A, RETN, THBS1, APOLD1, REPIN1, SLCO3A1, LIPG, PPARG, LDLRAP1, APOL1, PLTP, NTSR1, ATP9A	655	342	16650	1.56087	1	0.337105	0.312511
GOTERM_BP_FAT	GO:0070304~positive regulation of stress-activated protein kinase signaling cascade	11	1.39417	0.0493782	RASSF2, IL26, GADD45A, DAB2IP, TLR9, F2RL1, CCR7, MID1, MAP3K4, SLAMF1, VEGFA	655	140	16650	1.99727	1	0.337772	0.313129
GOTERM_BP_FAT	GO:0060021~palate development	8	1.01394	0.0494931	GABRB3, TBX1, MEF2C, LEF1, ARID5B, BCOR, INHBA, GLI3	655	85	16650	2.39246	1	0.337772	0.313129
GOTERM_BP_FAT	GO:0043255~regulation of carbohydrate biosynthetic process	8	1.01394	0.0494931	PPP1R3F, PLEK, PDGFB, GRB10, IGF2, FOXO1, NTSR1, SNCA	655	85	16650	2.39246	1	0.337772	0.313129
GOTERM_BP_FAT	GO:0043154~negative regulation of cysteine-type endopeptidase activity involved in apoptotic process	8	1.01394	0.0494931	CASP8, ADORA2A, LEF1, THBS1, PAX2, RAG1, SNCA, VEGFA	655	85	16650	2.39246	1	0.337772	0.313129
GOTERM_BP_FAT	GO:0010810~regulation of cell-substrate adhesion	13	1.64766	0.0501799	DOCK5, PTPRJ, PLG, NID1, THBS1, VEGFA, MMP14, PLAU, NINJ1, RAC3, ITGA6, CCR7, PHLDB2	655	179	16650	1.84613	1	0.342102	0.317143
GOTERM_BP_FAT	GO:1903035~negative regulation of response to wounding	7	0.887199	0.0504162	PLAU, KRT1, PDGFB, PLG, THBS1, PHLDB2, KLKB1	655	68	16650	2.61675	1	0.342998	0.317974
GOTERM_BP_FAT	GO:0043647~inositol phosphate metabolic process	7	0.887199	0.0504162	NUDT11, INPP5A, PLEK, PLCH1, PLCB2, NTSR1, SNCA	655	68	16650	2.61675	1	0.342998	0.317974
GOTERM_BP_FAT	GO:2000045~regulation of G1/S transition of mitotic cell cycle	11	1.39417	0.0513716	PLK3, CDKN1B, SLFN11, ANXA1, CCND2, GADD45A, PIM1, TNKS1BP1, UBE2E2, MYO16, SOX4	655	141	16650	1.98311	1	0.34909	0.323621
GOTERM_BP_FAT	GO:0009261~ribonucleotide catabolic process	5	0.633714	0.0514719	NUDT11, PDE10A, PDE4D, PDE4C, PDE8A	655	36	16650	3.53053	1	0.34909	0.323621
GOTERM_BP_FAT	GO:0031076~embryonic camera-type eye development	5	0.633714	0.0514719	RARG, RDH10, ALDH1A2, SIX3, PAX2	655	36	16650	3.53053	1	0.34909	0.323621
GOTERM_BP_FAT	GO:0033273~response to vitamin	8	1.01394	0.0521408	CXCL10, MEF2C, ALDH1A2, KYNU, PIM1, STC1, PPARG, PTGS2	655	86	16650	2.36464	1	0.353261	0.327488
GOTERM_BP_FAT	GO:0097190~apoptotic signaling pathway	32	4.05577	0.0529789	CSF2, BCL2A1, KDM1A, ITPR1, FASLG, ATP2A1, DBH, THBS1, SPN, CASP8, BCL2L11, ZMAT1, PERP, CREB3L1, TNFSF10, CHAC1, IL6R, SRGN, JUN, TNFRSF9, DAB2IP, TMC8, TNFRSF10A, INHBA, SSTR3, TNFRSF10D, TNFRSF1A, NFATC4, ADORA2A, ITGA6, CD24, ATF3	655	583	16650	1.39526	1	0.357673	0.331578
GOTERM_BP_FAT	GO:0050777~negative regulation of immune response	10	1.26743	0.0532589	SPN, ADCYAP1, ANXA1, ANGPT1, CD300A, SUSD4, NLRC5, XCL1, PPARG, SLAMF1	655	123	16650	2.06665	1	0.357673	0.331578
GOTERM_BP_FAT	GO:0010226~response to lithium ion	4	0.506971	0.0533391	CDKN1B, ADCY1, PTGS2, NFATC4	655	22	16650	4.62179	1	0.357673	0.331578
GOTERM_BP_FAT	GO:2001267~regulation of cysteine-type endopeptidase activity involved in apoptotic signaling pathway	4	0.506971	0.0533391	CASP8, TNFSF10, FASLG, TNFRSF10A	655	22	16650	4.62179	1	0.357673	0.331578
GOTERM_BP_FAT	GO:0030325~adrenal gland development	4	0.506971	0.0533391	MDK, WT1, HMGA2, ARID5B	655	22	16650	4.62179	1	0.357673	0.331578
GOTERM_BP_FAT	GO:0090103~cochlea morphogenesis	4	0.506971	0.0533391	TBX1, PAX2, TSHR, CTHRC1	655	22	16650	4.62179	1	0.357673	0.331578
GOTERM_BP_FAT	GO:0032660~regulation of interleukin-17 production	4	0.506971	0.0533391	IL23A, PRKCQ, IL36RN, LY9	655	22	16650	4.62179	1	0.357673	0.331578
GOTERM_BP_FAT	GO:0009214~cyclic nucleotide catabolic process	4	0.506971	0.0533391	PDE10A, PDE4D, PDE4C, PDE8A	655	22	16650	4.62179	1	0.357673	0.331578
GOTERM_BP_FAT	GO:0060330~regulation of response to interferon-gamma	4	0.506971	0.0533391	SOCS1, NLRC5, PPARG, PARP9	655	22	16650	4.62179	1	0.357673	0.331578
GOTERM_BP_FAT	GO:0002438~acute inflammatory response to antigenic stimulus	4	0.506971	0.0533391	SPN, ADCYAP1, IL31RA, CCR7	655	22	16650	4.62179	1	0.357673	0.331578
GOTERM_BP_FAT	GO:0035148~tube formation	11	1.39417	0.0534177	VASP, RARG, BCL2L11, PTCH1, DAB2IP, PLXNB2, ADM, SOX4, PAX2, CTHRC1, VEGFA	655	142	16650	1.96914	1	0.357833	0.331726
GOTERM_BP_FAT	GO:0032680~regulation of tumor necrosis factor production	9	1.14068	0.0545666	SPN, ANGPT1, IL23A, MAPKAPK2, TLR9, THBS1, SLAMF1, NFATC4, UBE2J1	655	105	16650	2.17884	1	0.364871	0.338251
GOTERM_BP_FAT	GO:0031346~positive regulation of cell projection organization	19	2.40811	0.0545799	HDAC4, UNC13A, KDM1A, BCL11A, DAB2IP, C15ORF62, NEDD4L, RASAL1, L1CAM, VEGFA, ADCYAP1, CDH4, FSCN1, F2RL1, PLXNB2, EPS8L2, CCR7, SLIT2, AGRN	655	304	16650	1.58874	1	0.364871	0.338251
GOTERM_BP_FAT	GO:2000379~positive regulation of reactive oxygen species metabolic process	8	1.01394	0.054876	HDAC4, GADD45A, PDGFB, F2RL1, PTGS2, THBS1, KLF2, SNCA	655	87	16650	2.33746	1	0.366475	0.339738
GOTERM_BP_FAT	GO:1904018~positive regulation of vasculature development	11	1.39417	0.0555171	CCBE1, TMIGD2, PDGFB, C3AR1, ADM, GATA2, PTGS2, THBS1, HDAC9, RHOB, VEGFA	655	143	16650	1.95537	1	0.369347	0.3424
GOTERM_BP_FAT	GO:0055067~monovalent inorganic cation homeostasis	11	1.39417	0.0555171	SLC9A2, ADORA2A, CYP4F2, SCNN1A, AVPR2, NEDD4L, FASLG, ATP6V0A4, ATP1B1, SGK1, CYP4F12	655	143	16650	1.95537	1	0.369347	0.3424
GOTERM_BP_FAT	GO:0002262~myeloid cell homeostasis	10	1.26743	0.0555284	BCL2L11, ANXA1, KDM1A, EPAS1, IKZF1, INHBA, GATA2, ZFPM1, KLF2, VEGFA	655	124	16650	2.04999	1	0.369347	0.3424
GOTERM_BP_FAT	GO:0071805~potassium ion transmembrane transport	13	1.64766	0.0555885	KCNK7, KCNJ15, AKAP7, NEDD4L, KCNAB1, ANK2, KCNJ18, KCNA6, ATP1B1, SLC9A2, KCNQ3, KCNMB4, SLC12A7	655	182	16650	1.8157	1	0.369347	0.3424
GOTERM_BP_FAT	GO:0071804~cellular potassium ion transport	13	1.64766	0.0555885	KCNK7, KCNJ15, AKAP7, NEDD4L, KCNAB1, ANK2, KCNJ18, KCNA6, ATP1B1, SLC9A2, KCNQ3, KCNMB4, SLC12A7	655	182	16650	1.8157	1	0.369347	0.3424
GOTERM_BP_FAT	GO:0050673~epithelial cell proliferation	21	2.6616	0.055657	TBX1, JUN, MEF2C, CDKN1B, ANGPT1, IL26, PTCH1, DAB2IP, PDGFB, HTR2B, HMGA2, NRARP, RUNX3, THBS1, PAX2, VEGFA, EPB41L4B, MMP14, ALDH1A2, ID1, KLF9	655	347	16650	1.53838	1	0.369427	0.342474
GOTERM_BP_FAT	GO:0030100~regulation of endocytosis	14	1.7744	0.0558016	ANGPT1, CD300A, NEDD4L, STON2, GATA2, VEGFA, FGR, DAB2, EHD4, BIN1, F2RL1, PPARG, LDLRAP1, SNCA	655	202	16650	1.76177	1	0.370011	0.343016
GOTERM_BP_FAT	GO:0002934~desmosome organization	3	0.380228	0.0562435	DSP, JUP, PERP	655	10	16650	7.62595	1	0.37106	0.343988
GOTERM_BP_FAT	GO:0072540~T-helper 17 cell lineage commitment	3	0.380228	0.0562435	IL23A, LY9, BATF	655	10	16650	7.62595	1	0.37106	0.343988
GOTERM_BP_FAT	GO:0070493~thrombin receptor signaling pathway	3	0.380228	0.0562435	PLEK, F2RL1, SNCA	655	10	16650	7.62595	1	0.37106	0.343988
GOTERM_BP_FAT	GO:2000316~regulation of T-helper 17 type immune response	3	0.380228	0.0562435	IL23A, NLRP3, PRKCQ	655	10	16650	7.62595	1	0.37106	0.343988
GOTERM_BP_FAT	GO:0010642~negative regulation of platelet-derived growth factor receptor signaling pathway	3	0.380228	0.0562435	PTGIR, PTPRJ, SNCA	655	10	16650	7.62595	1	0.37106	0.343988
GOTERM_BP_FAT	GO:0071300~cellular response to retinoic acid	7	0.887199	0.0566337	TBX1, MEF2C, RARG, ALDH1A2, PPARG, RORB, PAX2	655	70	16650	2.54198	1	0.372881	0.345677
GOTERM_BP_FAT	GO:0010717~regulation of epithelial to mesenchymal transition	7	0.887199	0.0566337	FOXA1, DAB2, BAMBI, LEF1, DAB2IP, DACT3, PHLDB2	655	70	16650	2.54198	1	0.372881	0.345677
GOTERM_BP_FAT	GO:0002252~immune effector process	39	4.94297	0.0568749	RNASEL, CXCL9, LEF1, NLRC5, RORC, PRF1, DBH, GATA2, CD1C, LY9, SPN, MYB, C3AR1, SUSD4, SLAMF7, NLRP3, IL6R, SLAMF1, EOMES, HLA-DRB5, ANXA1, ANGPT1, CD300A, KRT1, IL13, PLCL2, IL31RA, GAB2, BATF, FGR, LAT2, CXCL10, SLFN11, AIM2, IL23A, CLCF1, F2RL1, XCL1, ZFPM1	655	742	16650	1.33608	1	0.374093	0.3468
GOTERM_BP_FAT	GO:0048675~axon extension	9	1.14068	0.057093	CDH4, BCL11A, RAPH1, SLIT1, SLIT2, PLXNC1, L1CAM, PLXNA4, VEGFA	655	106	16650	2.15829	1	0.37515	0.34778
GOTERM_BP_FAT	GO:0022617~extracellular matrix disassembly	8	1.01394	0.0576989	MMP14, MMP13, FSCN1, PLG, NID1, MMP8, KLKB1, HSPG2	655	88	16650	2.3109	1	0.378751	0.351118
GOTERM_BP_FAT	GO:0050708~regulation of protein secretion	23	2.91508	0.0582288	SRGN, HLA-DRB5, ANXA1, ANGPT1, IL26, IL1R2, TNFRSF9, IL13, ITPR1, HTR2B, FGR, PPP3CA, AIM2, SOCS1, ADORA2A, CASP1, TLR9, F2RL1, NLRP3, CCR7, IL36RN, SOX4, SLAMF1	655	392	16650	1.49147	1	0.381637	0.353793
GOTERM_BP_FAT	GO:0018108~peptidyl-tyrosine phosphorylation	21	2.6616	0.0582554	ITK, CSF2, ANGPT1, CD300A, IL13, STYK1, PDGFB, LIF, IL31RA, IGF2, ADRA2B, TNFRSF1A, VEGFA, FGR, SOCS1, EHD4, IL23A, CLCF1, SH3BP5, CD24, IL6R	655	349	16650	1.52956	1	0.381637	0.353793
GOTERM_BP_FAT	GO:0007389~pattern specification process	25	3.16857	0.0588094	FOXA1, RARG, LEF1, STC1, NRARP, HOXC13, CXXC4, GLI3, SIX3, EOMES, TBX1, MEF2C, PTCH1, MICAL2, MID1, PAX2, NFATC4, VEGFA, COL4A1, WT1, ALDH1A2, ARMC4, HOXB3, BCOR, HOXD8	655	436	16650	1.45756	1	0.384881	0.356801
GOTERM_BP_FAT	GO:0002699~positive regulation of immune effector process	12	1.52091	0.0588811	FGR, ANXA1, CD300A, IL23A, CLCF1, MYB, IL13, NLRP3, F2RL1, XCL1, GAB2, GATA2	655	164	16650	1.85999	1	0.384965	0.356878
GOTERM_BP_FAT	GO:0045087~innate immune response	43	5.44994	0.0590426	ITK, RNASEL, CCL3L1, NCF2, CCL4L2, GFI1, NLRC5, LY9, SIRPB1, IL1RL2, CASP8, SOCS1, IL36B, IRAK2, KYNU, SUSD4, SLAMF7, NLRP3, IL36RN, APOL1, SNCA, SLAMF1, HLA-DRB5, CCL22, ANXA1, CCL20, KRT1, STYK1, DAB2IP, IL36G, PARP9, MID1, FGR, CLEC4A, AIM2, IL23A, MAPKAPK2, TLR9, XCL2, F2RL1, XCL1, PPARG, RAB7B	655	836	16650	1.30748	1	0.38527	0.357162
GOTERM_BP_FAT	GO:0007409~axonogenesis	24	3.04183	0.0590457	VASP, BRSK1, SPTBN5, BCL11A, RAPH1, ADCY1, L1CAM, GLI3, PAX2, VEGFA, CDH4, EFNA3, EFNA2, FLRT2, PARD3, GPC1, SLIT1, TLR9, PLXNB2, PRKCQ, SLIT2, PLXNC1, FGF13, PLXNA4	655	413	16650	1.47718	1	0.38527	0.357162
GOTERM_BP_FAT	GO:0001945~lymph vessel development	4	0.506971	0.0596123	TBX1, CCBE1, PTPN14, VEGFA	655	23	16650	4.42084	1	0.387421	0.359155
GOTERM_BP_FAT	GO:0043949~regulation of cAMP-mediated signaling	4	0.506971	0.0596123	CXCL10, CXCL9, PTGIR, PDE10A	655	23	16650	4.42084	1	0.387421	0.359155
GOTERM_BP_FAT	GO:0072215~regulation of metanephros development	4	0.506971	0.0596123	WT1, PDGFB, LIF, PAX2	655	23	16650	4.42084	1	0.387421	0.359155
GOTERM_BP_FAT	GO:0010882~regulation of cardiac muscle contraction by calcium ion signaling	4	0.506971	0.0596123	HDAC4, RYR2, ANK2, ATP1B1	655	23	16650	4.42084	1	0.387421	0.359155
GOTERM_BP_FAT	GO:0014706~striated muscle tissue development	21	2.6616	0.0596721	EOMES, DSP, TBX1, HDAC4, RYR2, BMP10, MEF2C, TENM4, TSC22D3, LEF1, KCNAB1, HDAC9, VEGFA, PPP3CA, WT1, GPC1, ALDH1A2, MYO18B, FLNB, ZFPM1, ATF3	655	350	16650	1.52519	1	0.387424	0.359158
GOTERM_BP_FAT	GO:0032088~negative regulation of NF-kappaB transcription factor activity	7	0.887199	0.0599076	AIM2, IRAK2, GFI1, DAB2IP, NLRC5, TLR9, NLRP3	655	71	16650	2.50618	1	0.388379	0.360043
GOTERM_BP_FAT	GO:0030858~positive regulation of epithelial cell differentiation	6	0.760456	0.0601161	PTCH1, IL13, LIF, S1PR2, CD24, PAX2	655	54	16650	2.82443	1	0.388379	0.360043
GOTERM_BP_FAT	GO:0060425~lung morphogenesis	6	0.760456	0.0601161	FOXA1, RDH10, ID1, LIF, HMGA2, SPRY2	655	54	16650	2.82443	1	0.388379	0.360043
GOTERM_BP_FAT	GO:0010633~negative regulation of epithelial cell migration	6	0.760456	0.0601161	STARD13, BMP10, DAB2IP, STC1, SLIT2, THBS1	655	54	16650	2.82443	1	0.388379	0.360043
GOTERM_BP_FAT	GO:0090183~regulation of kidney development	6	0.760456	0.0601161	WT1, PDGFB, LIF, CD24, PAX2, VEGFA	655	54	16650	2.82443	1	0.388379	0.360043
GOTERM_BP_FAT	GO:2000241~regulation of reproductive process	10	1.26743	0.0602533	NPPC, SPINK2, CDKN1B, ASTL, WT1, LIF, INHBA, RETN, FBXO43, ZP4	655	126	16650	2.01745	1	0.388881	0.360509
GOTERM_BP_FAT	GO:0001656~metanephros development	8	1.01394	0.0606101	WT1, RDH10, PTCH1, PDGFB, LIF, ID3, GLI3, PAX2	655	89	16650	2.28493	1	0.389952	0.361502
GOTERM_BP_FAT	GO:0043029~T cell homeostasis	5	0.633714	0.0607176	GPR174, BCL2L11, SIT1, TSC22D3, RAG1	655	38	16650	3.34472	1	0.389952	0.361502
GOTERM_BP_FAT	GO:0032374~regulation of cholesterol transport	5	0.633714	0.0607176	NUS1, PTCH1, LIPG, PPARG, PLTP	655	38	16650	3.34472	1	0.389952	0.361502
GOTERM_BP_FAT	GO:0031638~zymogen activation	5	0.633714	0.0607176	MMP14, CASP8, PERP, THBS1, KLKB1	655	38	16650	3.34472	1	0.389952	0.361502
GOTERM_BP_FAT	GO:0032371~regulation of sterol transport	5	0.633714	0.0607176	NUS1, PTCH1, LIPG, PPARG, PLTP	655	38	16650	3.34472	1	0.389952	0.361502
GOTERM_BP_FAT	GO:0045927~positive regulation of growth	16	2.02788	0.0608134	BMP10, MEF2C, UNC13A, BCL11A, LEF1, HMGA2, NEDD4L, RASAL1, L1CAM, TSHR, VEGFA, MMP14, CDH4, KRT17, WT1, AGRN	655	246	16650	1.65332	1	0.390184	0.361717
GOTERM_BP_FAT	GO:0018212~peptidyl-tyrosine modification	21	2.6616	0.0611499	ITK, CSF2, ANGPT1, CD300A, IL13, STYK1, PDGFB, LIF, IL31RA, IGF2, ADRA2B, TNFRSF1A, VEGFA, FGR, SOCS1, EHD4, IL23A, CLCF1, SH3BP5, CD24, IL6R	655	351	16650	1.52085	1	0.391959	0.363363
GOTERM_BP_FAT	GO:0032412~regulation of ion transmembrane transporter activity	13	1.64766	0.0613761	RYR2, MEF2C, AHNAK, PDE4D, ANO9, AKAP7, NEDD4L, KCNAB1, ANK2, ATP1B1, TLR9, NTSR1, PTPN3	655	185	16650	1.78626	1	0.393024	0.364349
GOTERM_BP_FAT	GO:0071156~regulation of cell cycle arrest	9	1.14068	0.0623652	PLK3, CDKN1B, BIN1, GADD45A, DAB2IP, TNKS1BP1, HMGA2, ZNF268, SOX4	655	108	16650	2.11832	1	0.397799	0.368776
GOTERM_BP_FAT	GO:0046660~female sex differentiation	9	1.14068	0.0623652	ADCYAP1, MMP14, WT1, ARID5B, COL9A3, INHBA, SLIT2, RETN, VEGFA	655	108	16650	2.11832	1	0.397799	0.368776
GOTERM_BP_FAT	GO:0019751~polyol metabolic process	9	1.14068	0.0623652	NUDT11, INPP5A, PLEK, SORD, PLCH1, PLCB2, SGPP2, NTSR1, SNCA	655	108	16650	2.11832	1	0.397799	0.368776
GOTERM_BP_FAT	GO:1903555~regulation of tumor necrosis factor superfamily cytokine production	9	1.14068	0.0623652	SPN, ANGPT1, IL23A, MAPKAPK2, TLR9, THBS1, SLAMF1, NFATC4, UBE2J1	655	108	16650	2.11832	1	0.397799	0.368776
GOTERM_BP_FAT	GO:0045766~positive regulation of angiogenesis	10	1.26743	0.0627093	CCBE1, TMIGD2, C3AR1, ADM, GATA2, PTGS2, THBS1, HDAC9, RHOB, VEGFA	655	127	16650	2.00156	1	0.399218	0.370092
GOTERM_BP_FAT	GO:0010629~negative regulation of gene expression	71	8.99873	0.0627098	FOXA1, RARG, CDKN1B, KDM1A, GFI1, WWC2, NRARP, FASLG, IKZF1, RORB, GLI3, IKZF4, PPP3CA, ZIC2, SIX3, MYB, WWC3, CHAC1, JARID2, EOMES, HES6, MEF2C, TLE1, TSC22D3, IL1R2, ZBTB32, ARID5B, CBFA2T3, RUNX3, PAX2, ETV6, ZEB2, TXNIP, HOXB3, XCL1, PPARG, ZFPM1, ATF3, HDAC4, MAGEL2, SATB1, LEF1, PDGFB, NEDD4L, GATA2, HDAC9, THBS1, FOXO1, PURB, PCBP3, SUSD4, ZNF268, SNCA, PLK3, JUN, BCL11A, PTCH1, DAB2IP, HM…	655	1485	16650	1.21536	1	0.399218	0.370092
GOTERM_BP_FAT	GO:0071214~cellular response to abiotic stimulus	17	2.15463	0.0630595	HDAC4, KDM1A, GADD45A, IL13, HMGA2, TNFRSF10A, SLC2A4, PTGS2, RCSD1, RHOB, NFATC4, TNFRSF1A, CASP8, CASP1, ADSSL1, RAD9B, SLC38A3	655	268	16650	1.61245	1	0.401053	0.371793
GOTERM_BP_FAT	GO:0032612~interleukin-1 production	7	0.887199	0.0632918	AIM2, CCL20, IL1R2, CASP1, NLRP3, F2RL1, CCR7	655	72	16650	2.47137	1	0.40136	0.372077
GOTERM_BP_FAT	GO:0070227~lymphocyte apoptotic process	7	0.887199	0.0632918	BCL2L11, TSC22D3, RORC, FASLG, PRKCQ, GLI3, RAG1	655	72	16650	2.47137	1	0.40136	0.372077
GOTERM_BP_FAT	GO:0043407~negative regulation of MAP kinase activity	7	0.887199	0.0632918	DUSP4, RGS3, CD300A, DAB2IP, SPRY2, PTPRJ, DUSP9	655	72	16650	2.47137	1	0.40136	0.372077
GOTERM_BP_FAT	GO:0001676~long-chain fatty acid metabolic process	8	1.01394	0.0636098	FADS2, CYP4F2, EPHX2, ACSL6, PTGS2, CYP4F12, MGLL, PTGS1	655	90	16650	2.25954	1	0.402985	0.373584
GOTERM_BP_FAT	GO:0071385~cellular response to glucocorticoid stimulus	6	0.760456	0.0640929	ADCYAP1, ANXA1, KLF9, STC1, SSTR3, FOXO1	655	55	16650	2.77307	1	0.405261	0.375694
GOTERM_BP_FAT	GO:0086003~cardiac muscle cell contraction	6	0.760456	0.0640929	DSP, RYR2, JUP, NEDD4L, ANK2, FGF13	655	55	16650	2.77307	1	0.405261	0.375694
GOTERM_BP_FAT	GO:0072659~protein localization to plasma membrane	14	1.7744	0.0651235	LAMA5, AMN, JUP, PTCH1, RHOG, ANK2, ATP1B1, TNFRSF1A, TSPAN15, DAB2, CDH2, MAP7, LDLRAP1, FGF13	655	207	16650	1.71922	1	0.411379	0.381366
GOTERM_BP_FAT	GO:1900182~positive regulation of protein localization to nucleus	10	1.26743	0.0652282	PPP3CA, DAB2, JUP, IL23A, BAMBI, LIF, TLR9, PTGS2, ZNF268, GLI3	655	128	16650	1.98593	1	0.411643	0.38161
GOTERM_BP_FAT	GO:0046006~regulation of activated T cell proliferation	5	0.633714	0.0656479	TMIGD2, IL23A, IGF2, CD24, SLAMF1	655	39	16650	3.25895	1	0.413088	0.382949
GOTERM_BP_FAT	GO:0033003~regulation of mast cell activation	5	0.633714	0.0656479	FGR, CD300A, IL13, GAB2, GATA2	655	39	16650	3.25895	1	0.413088	0.382949
GOTERM_BP_FAT	GO:1901016~regulation of potassium ion transmembrane transporter activity	5	0.633714	0.0656479	AKAP7, NEDD4L, KCNAB1, ANK2, ATP1B1	655	39	16650	3.25895	1	0.413088	0.382949
GOTERM_BP_FAT	GO:0044089~positive regulation of cellular component biogenesis	25	3.16857	0.0657099	HDAC4, MAGEL2, BMP10, CDKN1B, CSF2, PLEK, AMIGO2, C15ORF62, PTPRJ, PPM1E, BCL2L11, FLRT2, EPS8L2, CCR7, VASP, JUN, VEGFA, AIM2, PSRC1, ID1, FSCN1, SPIRE1, F2RL1, AGRN, PHLDB2	655	441	16650	1.44103	1	0.413088	0.382949
GOTERM_BP_FAT	GO:0051354~negative regulation of oxidoreductase activity	4	0.506971	0.066214	GFI1, GZMA, IL13, SNCA	655	24	16650	4.23664	1	0.414662	0.384409
GOTERM_BP_FAT	GO:0060384~innervation	4	0.506971	0.066214	GABRB3, GABRB2, UNC13A, LRIG1	655	24	16650	4.23664	1	0.414662	0.384409
GOTERM_BP_FAT	GO:0003071~renal system process involved in regulation of systemic arterial blood pressure	4	0.506971	0.066214	CYP4F2, PDGFB, F2RL1, CYP4F12	655	24	16650	4.23664	1	0.414662	0.384409
GOTERM_BP_FAT	GO:0031954~positive regulation of protein autophosphorylation	4	0.506971	0.066214	RASSF2, PDGFC, PDGFB, VEGFA	655	24	16650	4.23664	1	0.414662	0.384409
GOTERM_BP_FAT	GO:0009798~axis specification	8	1.01394	0.0666982	WT1, PTCH1, SIX3, STC1, NRARP, BCOR, CXXC4, HOXD8	655	91	16650	2.23471	1	0.415971	0.385623
GOTERM_BP_FAT	GO:0072078~nephron tubule morphogenesis	7	0.887199	0.0667864	LAMA5, WT1, PTCH1, KLHL3, GLI3, PAX2, VEGFA	655	73	16650	2.43752	1	0.415971	0.385623
GOTERM_BP_FAT	GO:0045060~negative thymic T cell selection	3	0.380228	0.0669956	SPN, CCR7, GLI3	655	11	16650	6.93269	1	0.415971	0.385623
GOTERM_BP_FAT	GO:0042535~positive regulation of tumor necrosis factor biosynthetic process	3	0.380228	0.0669956	SPN, MAPKAPK2, THBS1	655	11	16650	6.93269	1	0.415971	0.385623
GOTERM_BP_FAT	GO:0016114~terpenoid biosynthetic process	3	0.380228	0.0669956	FDPS, RDH10, ALDH1A2	655	11	16650	6.93269	1	0.415971	0.385623
GOTERM_BP_FAT	GO:0048711~positive regulation of astrocyte differentiation	3	0.380228	0.0669956	BIN1, CLCF1, LIF	655	11	16650	6.93269	1	0.415971	0.385623
GOTERM_BP_FAT	GO:0035745~T-helper 2 cell cytokine production	3	0.380228	0.0669956	IL31RA, NLRP3, XCL1	655	11	16650	6.93269	1	0.415971	0.385623
GOTERM_BP_FAT	GO:0042182~ketone catabolic process	3	0.380228	0.0669956	CYP4F2, KYNU, CYP4F11	655	11	16650	6.93269	1	0.415971	0.385623
GOTERM_BP_FAT	GO:0048703~embryonic viscerocranium morphogenesis	3	0.380228	0.0669956	TBX1, MEF2C, RDH10	655	11	16650	6.93269	1	0.415971	0.385623
GOTERM_BP_FAT	GO:0015672~monovalent inorganic cation transport	27	3.42205	0.0670854	KCNK7, CDKN1B, SLC23A1, NEDD4L, AKAP7, KCNA6, SLC8A2, KCNMB4, ATP6V0A4, SLC38A3, SLC12A7, SLC12A8, KCNJ15, ATP1B4, KLHL3, KCNAB1, ANK2, KCNJ18, ATP1B1, SLC9A2, ADCYAP1, SLC6A8, SCNN1A, KCNQ3, FGF13, SGK1, PTPN3	655	486	16650	1.41221	1	0.416133	0.385773
GOTERM_BP_FAT	GO:0098742~cell-cell adhesion via plasma-membrane adhesion molecules	15	1.90114	0.067195	PCDH9, TENM4, AMIGO2, PCDH12, PCDH18, CLDN1, FGFRL1, SELP, SDK1, CDH4, PCDHB2, CDH2, PLXNB2, FAT2, CD200	655	229	16650	1.66506	1	0.416418	0.386037
GOTERM_BP_FAT	GO:0050770~regulation of axonogenesis	12	1.52091	0.0675151	CDH4, BCL11A, UST, SLIT1, PLXNB2, SLIT2, PLXNC1, FGF13, L1CAM, SSH3, PLXNA4, VEGFA	655	168	16650	1.8157	1	0.418006	0.387509
GOTERM_BP_FAT	GO:0032418~lysosome localization	6	0.760456	0.0682139	LAT2, FGR, CD300A, IL13, GAB2, GATA2	655	56	16650	2.72356	1	0.421136	0.39041
GOTERM_BP_FAT	GO:0051937~catecholamine transport	6	0.760456	0.0682139	RAB3B, ADORA2A, SLC22A1, CHRNA6, ADRA2B, SNCA	655	56	16650	2.72356	1	0.421136	0.39041
GOTERM_BP_FAT	GO:0042311~vasodilation	6	0.760456	0.0682139	NPPC, ADCYAP1, ADORA2A, EPHX2, F2RL1, ADM	655	56	16650	2.72356	1	0.421136	0.39041
GOTERM_BP_FAT	GO:0071453~cellular response to oxygen levels	11	1.39417	0.0692498	PLK3, EGLN3, EPAS1, STC1, CA9, PPARG, SLC2A4, PTGS2, CPEB2, FOXO1, VEGFA	655	149	16650	1.87663	1	0.425922	0.394847
GOTERM_BP_FAT	GO:0071222~cellular response to lipopolysaccharide	11	1.39417	0.0692498	CXCL10, MEF2C, CSF2, IRAK2, CCL20, CEBPE, GFI1, PDE4D, DAB2IP, NLRP3, TRIB1	655	149	16650	1.87663	1	0.425922	0.394847
GOTERM_BP_FAT	GO:0016331~morphogenesis of embryonic epithelium	11	1.39417	0.0692498	VASP, LAMA5, RARG, RDH10, ALDH1A2, PTCH1, PLXNB2, ADM, SOX4, PAX2, CTHRC1	655	149	16650	1.87663	1	0.425922	0.394847
GOTERM_BP_FAT	GO:0043409~negative regulation of MAPK cascade	11	1.39417	0.0692498	DUSP4, RGS3, CD300A, DAB2IP, LIF, F2RL1, SPRY2, PTPRJ, DUSP9, ATF3, FOXO1	655	149	16650	1.87663	1	0.425922	0.394847
GOTERM_BP_FAT	GO:0003007~heart morphogenesis	15	1.90114	0.0697645	DSP, TBX1, RYR2, BMP10, JUN, MEF2C, PTCH1, HTR2B, MICAL2, FGFRL1, VEGFA, FLRT2, ALDH1A2, ZFPM1, SOX4	655	230	16650	1.65782	1	0.428684	0.397408
GOTERM_BP_FAT	GO:0036211~protein modification process	167	21.166	0.0706267	RAB3B, GALNT14, CSF2, KDM1A, TTLL10, CCL4L2, GFI1, CCND3, RASSF2, RGS3, CCND2, CDH2, RUSC1, MYB, PIM1, MAP3K8, PDE8A, IL6R, SOX4, MAP3K4, RAG1, MEF2C, CD300A, UBE2E2, ARID5B, RUNX3, MID1, ADCYAP1, IL23A, PARD3, MAPKAPK2, PRKCQ, TRIB1, TRIB2, ATF3, BRSK1, MAGEL2, CHRNA3, SPTBN5, SHC2, CCL3L1, PDGFB, NEDD4L, DTX1, RASAL1, GATA2, FBXO43, ART5, FOXO1, UBE2J1, SOCS1, FLRT2, IRAK2, PDGFC, ST8SIA4, TRPM…	655	3818	16650	1.11187	1	0.432768	0.401194
GOTERM_BP_FAT	GO:0006464~cellular protein modification process	167	21.166	0.0706267	RAB3B, GALNT14, CSF2, KDM1A, TTLL10, CCL4L2, GFI1, CCND3, RASSF2, RGS3, CCND2, CDH2, RUSC1, MYB, PIM1, MAP3K8, PDE8A, IL6R, SOX4, MAP3K4, RAG1, MEF2C, CD300A, UBE2E2, ARID5B, RUNX3, MID1, ADCYAP1, IL23A, PARD3, MAPKAPK2, PRKCQ, TRIB1, TRIB2, ATF3, BRSK1, MAGEL2, CHRNA3, SPTBN5, SHC2, CCL3L1, PDGFB, NEDD4L, DTX1, RASAL1, GATA2, FBXO43, ART5, FOXO1, UBE2J1, SOCS1, FLRT2, IRAK2, PDGFC, ST8SIA4, TRPM…	655	3818	16650	1.11187	1	0.432768	0.401194
GOTERM_BP_FAT	GO:0031952~regulation of protein autophosphorylation	5	0.633714	0.0707801	JUN, RASSF2, PDGFC, PDGFB, VEGFA	655	40	16650	3.17748	1	0.432768	0.401194
GOTERM_BP_FAT	GO:0045620~negative regulation of lymphocyte differentiation	5	0.633714	0.0707801	ANXA1, DTX1, NRARP, INHBA, GLI3	655	40	16650	3.17748	1	0.432768	0.401194
GOTERM_BP_FAT	GO:0071706~tumor necrosis factor superfamily cytokine production	9	1.14068	0.0708262	SPN, ANGPT1, IL23A, MAPKAPK2, TLR9, THBS1, SLAMF1, NFATC4, UBE2J1	655	111	16650	2.06107	1	0.432768	0.401194
GOTERM_BP_FAT	GO:0003158~endothelium development	9	1.14068	0.0708262	LAMA5, STARD13, PDE4D, ID1, F2RL1, STC1, S1PR2, RHOB, TNFRSF1A	655	111	16650	2.06107	1	0.432768	0.401194
GOTERM_BP_FAT	GO:0032956~regulation of actin cytoskeleton organization	18	2.28137	0.0715234	VASP, SPTBN5, BMP10, MEF2C, MAGEL2, PLEK, C15ORF62, ARHGAP18, SSH3, PPM1E, EPS8, ID1, FSCN1, F2RL1, SPIRE1, CCR7, SLIT2, PHLDB2	655	294	16650	1.55632	1	0.43662	0.404765
GOTERM_BP_FAT	GO:0061564~axon development	25	3.16857	0.0716907	BRSK1, SPTBN5, RAPH1, ADCY1, GLI3, CDH4, FLRT2, GPC1, SLIT1, SLIT2, PLXNC1, PLXNA4, VASP, JUN, BCL11A, L1CAM, PAX2, VEGFA, EFNA3, EFNA2, PARD3, TLR9, PLXNB2, PRKCQ, FGF13	655	445	16650	1.42808	1	0.437233	0.405333
GOTERM_BP_FAT	GO:0022898~regulation of transmembrane transporter activity	13	1.64766	0.071883	RYR2, MEF2C, AHNAK, PDE4D, ANO9, AKAP7, NEDD4L, KCNAB1, ANK2, ATP1B1, TLR9, NTSR1, PTPN3	655	190	16650	1.73925	1	0.437997	0.406042
GOTERM_BP_FAT	GO:0007163~establishment or maintenance of cell polarity	12	1.52091	0.0721232	SPN, BRSK1, PARD3, UST, FSCN1, MAP7, SPRY2, CCR7, FRMD4A, AMOTL1, FRMD4B, FGF13	655	170	16650	1.79434	1	0.438235	0.406263
GOTERM_BP_FAT	GO:1901654~response to ketone	12	1.52091	0.0721232	GJB2, KLF9, TXNIP, UGT3A2, CA9, CCR7, PPARG, SLIT2, ADCY1, THBS1, FOXO1, KLF2	655	170	16650	1.79434	1	0.438235	0.406263
GOTERM_BP_FAT	GO:0008064~regulation of actin polymerization or depolymerization	12	1.52091	0.0721232	VASP, EPS8, SPTBN5, MAGEL2, PLEK, C15ORF62, F2RL1, SPIRE1, ARHGAP18, CCR7, SLIT2, SSH3	655	170	16650	1.79434	1	0.438235	0.406263
GOTERM_BP_FAT	GO:0010830~regulation of myotube differentiation	6	0.760456	0.0724784	TBX1, HDAC4, CXCL10, MMP14, CXCL9, HDAC9	655	57	16650	2.67577	1	0.439654	0.407578
GOTERM_BP_FAT	GO:1900048~positive regulation of hemostasis	4	0.506971	0.0731339	SELP, PLEK, PLG, THBS1	655	25	16650	4.06718	1	0.439654	0.407578
GOTERM_BP_FAT	GO:0051954~positive regulation of amine transport	4	0.506971	0.0731339	RAB3B, ADORA2A, SLC38A3, NTSR1	655	25	16650	4.06718	1	0.439654	0.407578
GOTERM_BP_FAT	GO:0030194~positive regulation of blood coagulation	4	0.506971	0.0731339	SELP, PLEK, PLG, THBS1	655	25	16650	4.06718	1	0.439654	0.407578
GOTERM_BP_FAT	GO:2000191~regulation of fatty acid transport	4	0.506971	0.0731339	REPIN1, CYP4F2, THBS1, NTSR1	655	25	16650	4.06718	1	0.439654	0.407578
GOTERM_BP_FAT	GO:0032620~interleukin-17 production	4	0.506971	0.0731339	IL23A, PRKCQ, IL36RN, LY9	655	25	16650	4.06718	1	0.439654	0.407578
GOTERM_BP_FAT	GO:0036003~positive regulation of transcription from RNA polymerase II promoter in response to stress	4	0.506971	0.0731339	CREB3L1, ATF3, KLF2, VEGFA	655	25	16650	4.06718	1	0.439654	0.407578
GOTERM_BP_FAT	GO:0001952~regulation of cell-matrix adhesion	8	1.01394	0.0731414	MMP14, PLAU, NINJ1, PTPRJ, CCR7, THBS1, PHLDB2, VEGFA	655	93	16650	2.18665	1	0.439654	0.407578
GOTERM_BP_FAT	GO:1902476~chloride transmembrane transport	8	1.01394	0.0731414	GABRB3, GABRB2, GLRB, ANO9, SLC1A4, APOL1, SLC12A7, GABRD	655	93	16650	2.18665	1	0.439654	0.407578
GOTERM_BP_FAT	GO:0051153~regulation of striated muscle cell differentiation	8	1.01394	0.0731414	TBX1, HDAC4, CXCL10, MEF2C, MMP14, BMP10, CXCL9, HDAC9	655	93	16650	2.18665	1	0.439654	0.407578
GOTERM_BP_FAT	GO:0045981~positive regulation of nucleotide metabolic process	10	1.26743	0.0731636	NPPC, ADCYAP1, CXCL10, CXCL9, PTGIR, ADORA2A, AVPR2, ADM, ADCY1, TSHR	655	131	16650	1.94045	1	0.439654	0.407578
GOTERM_BP_FAT	GO:1900544~positive regulation of purine nucleotide metabolic process	10	1.26743	0.0731636	NPPC, ADCYAP1, CXCL10, CXCL9, PTGIR, ADORA2A, AVPR2, ADM, ADCY1, TSHR	655	131	16650	1.94045	1	0.439654	0.407578
GOTERM_BP_FAT	GO:0032880~regulation of protein localization	48	6.08365	0.073698	KDM1A, IL26, HTR2B, ITPR1, NEDD4L, PTGS2, GLI3, UBE2J1, PPP3CA, CASP8, SOCS1, BCL2L11, CDH2, MXI1, CASP1, DACT3, NLRP3, CCR7, IL36RN, LDLRAP1, ZNF268, SOX4, SLAMF1, SRGN, PLK3, HLA-DRB5, ANXA1, JUP, ANGPT1, TNFRSF9, PTCH1, IL1R2, IL13, DAB2IP, RHOG, LIF, PTPN14, VEGFA, FGR, ADCYAP1, DAB2, AIM2, ADORA2A, BAMBI, IL23A, TLR9, F2RL1, RHOU	655	962	16650	1.26835	1	0.442459	0.410178
GOTERM_BP_FAT	GO:0009306~protein secretion	26	3.29531	0.0742048	IL26, PLEK, HTR2B, ITPR1, PPP3CA, SOCS1, CASP1, NLRP3, CCR7, IL36RN, SOX4, SLAMF1, SRGN, HLA-DRB5, ANXA1, ANGPT1, TNFRSF9, IL1R2, IL13, MAFA, FGR, OLFM2, AIM2, ADORA2A, TLR9, F2RL1	655	469	16650	1.4092	1	0.445093	0.41262
GOTERM_BP_FAT	GO:0030832~regulation of actin filament length	12	1.52091	0.0745006	VASP, EPS8, SPTBN5, MAGEL2, PLEK, C15ORF62, F2RL1, SPIRE1, ARHGAP18, CCR7, SLIT2, SSH3	655	171	16650	1.78385	1	0.446457	0.413885
GOTERM_BP_FAT	GO:0030048~actin filament-based movement	10	1.26743	0.0759356	DSP, MYL4, RYR2, JUP, PDE4D, STC1, NEDD4L, ANK2, MYO7A, FGF13	655	132	16650	1.92575	1	0.453234	0.420167
GOTERM_BP_FAT	GO:0097028~dendritic cell differentiation	5	0.633714	0.0761113	CSF2, ZBTB46, F2RL1, CCR7, BATF	655	41	16650	3.09998	1	0.453234	0.420167
GOTERM_BP_FAT	GO:0045807~positive regulation of endocytosis	9	1.14068	0.0768374	DAB2, ANGPT1, F2RL1, NEDD4L, PPARG, GATA2, LDLRAP1, SNCA, VEGFA	655	113	16650	2.02459	1	0.453234	0.420167
GOTERM_BP_FAT	GO:0050829~defense response to Gram-negative bacterium	6	0.760456	0.0768852	SELP, IL23A, TLR9, F2RL1, ADM, IL6R	655	58	16650	2.62964	1	0.453234	0.420167
GOTERM_BP_FAT	GO:1903725~regulation of phospholipid metabolic process	6	0.760456	0.0768852	FGR, CCKBR, DAB2IP, PDGFB, HTR2B, CCR7	655	58	16650	2.62964	1	0.453234	0.420167
GOTERM_BP_FAT	GO:0070059~intrinsic apoptotic signaling pathway in response to endoplasmic reticulum stress	6	0.760456	0.0768852	BCL2L11, CREB3L1, DAB2IP, ITPR1, ATP2A1, CHAC1	655	58	16650	2.62964	1	0.453234	0.420167
GOTERM_BP_FAT	GO:0001658~branching involved in ureteric bud morphogenesis	6	0.760456	0.0768852	LAMA5, WT1, PTCH1, GLI3, PAX2, VEGFA	655	58	16650	2.62964	1	0.453234	0.420167
GOTERM_BP_FAT	GO:0071384~cellular response to corticosteroid stimulus	6	0.760456	0.0768852	ADCYAP1, ANXA1, KLF9, STC1, SSTR3, FOXO1	655	58	16650	2.62964	1	0.453234	0.420167
GOTERM_BP_FAT	GO:0060025~regulation of synaptic activity	2	0.253485	0.077018	STX1B, MEF2C	655	2	16650	25.4198	1	0.453234	0.420167
GOTERM_BP_FAT	GO:0060319~primitive erythrocyte differentiation	2	0.253485	0.077018	ZFPM1, VEGFA	655	2	16650	25.4198	1	0.453234	0.420167
GOTERM_BP_FAT	GO:0035744~T-helper 1 cell cytokine production	2	0.253485	0.077018	XCL1, SLAMF1	655	2	16650	25.4198	1	0.453234	0.420167
GOTERM_BP_FAT	GO:2000229~regulation of pancreatic stellate cell proliferation	2	0.253485	0.077018	IL13, PPARG	655	2	16650	25.4198	1	0.453234	0.420167
GOTERM_BP_FAT	GO:0098907~regulation of SA node cell action potential	2	0.253485	0.077018	RYR2, ANK2	655	2	16650	25.4198	1	0.453234	0.420167
GOTERM_BP_FAT	GO:0072343~pancreatic stellate cell proliferation	2	0.253485	0.077018	IL13, PPARG	655	2	16650	25.4198	1	0.453234	0.420167
GOTERM_BP_FAT	GO:0021644~vagus nerve morphogenesis	2	0.253485	0.077018	TBX1, PLXNA4	655	2	16650	25.4198	1	0.453234	0.420167
GOTERM_BP_FAT	GO:0042361~menaquinone catabolic process	2	0.253485	0.077018	CYP4F2, CYP4F11	655	2	16650	25.4198	1	0.453234	0.420167
GOTERM_BP_FAT	GO:0003422~growth plate cartilage morphogenesis	2	0.253485	0.077018	MATN1, STC1	655	2	16650	25.4198	1	0.453234	0.420167
GOTERM_BP_FAT	GO:0032474~otolith morphogenesis	2	0.253485	0.077018	LRIG1, LRIG3	655	2	16650	25.4198	1	0.453234	0.420167
GOTERM_BP_FAT	GO:0042377~vitamin K catabolic process	2	0.253485	0.077018	CYP4F2, CYP4F11	655	2	16650	25.4198	1	0.453234	0.420167
GOTERM_BP_FAT	GO:0035026~leading edge cell differentiation	2	0.253485	0.077018	DAB2, JUN	655	2	16650	25.4198	1	0.453234	0.420167
GOTERM_BP_FAT	GO:0060627~regulation of vesicle-mediated transport	25	3.16857	0.0776497	RAB3B, NEDD4L, C2CD4C, STON2, GATA2, CACNA1I, NCS1, LDLRAP1, EVI5, SNCA, SLAMF1, ANXA1, ANGPT1, CD300A, IL13, GAB2, SYTL3, VEGFA, FGR, STX1B, DAB2, EHD4, BIN1, F2RL1, PPARG	655	449	16650	1.41536	1	0.455267	0.422052
GOTERM_BP_FAT	GO:0019637~organophosphate metabolic process	54	6.84411	0.0778041	CXCL9, QPRT, PLEK, HTR2B, ADM, PHEX, HK2, NUDT11, NPPC, KYNU, LIPG, TK2, CCR7, PDE8A, PTGIR, PDE4D, PDE4C, AVPR2, SORD, ATP1B1, CBFA2T3, FGR, ADCYAP1, ADORA2A, CCKBR, TLR9, ADSSL1, ALDOC, HRASLS5, UQCRC2, PLCB2, HDAC4, GPR87, PDGFB, ADCY1, THBS1, AGPAT3, AGPAT4, INPP5A, CD19, ATP6V0A4, NTSR1, SNCA, FDPS, NUS1, MBD4, DAB2IP, ATP2B2, TSHR, VEGFA, CXCL10, PDE10A, PLCH1, LPIN3	655	1108	16650	1.23887	1	0.455267	0.422052
GOTERM_BP_FAT	GO:0045921~positive regulation of exocytosis	7	0.887199	0.0779312	FGR, CACNA1I, NCS1, IL13, F2RL1, GAB2, GATA2	655	76	16650	2.3413	1	0.455267	0.422052
GOTERM_BP_FAT	GO:0001776~leukocyte homeostasis	7	0.887199	0.0779312	GPR174, MEF2C, BCL2L11, ANXA1, SIT1, TSC22D3, RAG1	655	76	16650	2.3413	1	0.455267	0.422052
GOTERM_BP_FAT	GO:0048709~oligodendrocyte differentiation	7	0.887199	0.0779312	PRDM8, CDKN2C, TENM4, CD9, CXCR4, PPARG, GLI3	655	76	16650	2.3413	1	0.455267	0.422052
GOTERM_BP_FAT	GO:0040037~negative regulation of fibroblast growth factor receptor signaling pathway	3	0.380228	0.0783595	GPC1, SPRY2, THBS1	655	12	16650	6.35496	1	0.455267	0.422052
GOTERM_BP_FAT	GO:0045078~positive regulation of interferon-gamma biosynthetic process	3	0.380228	0.0783595	EBI3, TLR9, ZFPM1	655	12	16650	6.35496	1	0.455267	0.422052
GOTERM_BP_FAT	GO:0071872~cellular response to epinephrine stimulus	3	0.380228	0.0783595	RYR2, PDE4D, SNCA	655	12	16650	6.35496	1	0.455267	0.422052
GOTERM_BP_FAT	GO:0060536~cartilage morphogenesis	3	0.380228	0.0783595	MEF2C, MATN1, STC1	655	12	16650	6.35496	1	0.455267	0.422052
GOTERM_BP_FAT	GO:1902287~semaphorin-plexin signaling pathway involved in axon guidance	3	0.380228	0.0783595	PLXNB2, PLXNC1, PLXNA4	655	12	16650	6.35496	1	0.455267	0.422052
GOTERM_BP_FAT	GO:0007171~activation of transmembrane receptor protein tyrosine kinase activity	3	0.380228	0.0783595	CHRNA3, ANGPT1, PDGFC	655	12	16650	6.35496	1	0.455267	0.422052
GOTERM_BP_FAT	GO:0043383~negative T cell selection	3	0.380228	0.0783595	SPN, CCR7, GLI3	655	12	16650	6.35496	1	0.455267	0.422052
GOTERM_BP_FAT	GO:0002864~regulation of acute inflammatory response to antigenic stimulus	3	0.380228	0.0783595	SPN, ADCYAP1, CCR7	655	12	16650	6.35496	1	0.455267	0.422052
GOTERM_BP_FAT	GO:0043950~positive regulation of cAMP-mediated signaling	3	0.380228	0.0783595	CXCL10, CXCL9, PTGIR	655	12	16650	6.35496	1	0.455267	0.422052
GOTERM_BP_FAT	GO:0032386~regulation of intracellular transport	26	3.29531	0.0784079	GATA2, PTGS2, GLI3, UBE2J1, PPP3CA, MXI1, DACT3, NLRP3, ZNF268, SOX4, PLK3, NUS1, JUP, ANGPT1, CD300A, IL13, DAB2IP, GAB2, PTPN14, FGR, REEP1, DAB2, BAMBI, IL23A, TLR9, RHOU	655	472	16650	1.40025	1	0.455267	0.422052
GOTERM_BP_FAT	GO:0043523~regulation of neuron apoptotic process	13	1.64766	0.0787122	GABRB3, HDAC4, GABRB2, JUN, EGLN3, MEF2C, ANGPT1, FASLG, BCL2L11, ADORA2A, MDK, CLCF1, SNCA	655	193	16650	1.71222	1	0.456566	0.423256
GOTERM_BP_FAT	GO:0051302~regulation of cell division	10	1.26743	0.0787713	PLK3, MDK, SUSD2, PTCH1, PDGFC, PDGFB, IGF2, HTR2B, TXNIP, VEGFA	655	133	16650	1.91127	1	0.456566	0.423256
GOTERM_BP_FAT	GO:0007009~plasma membrane organization	17	2.15463	0.0791176	LAMA5, AMN, JUP, PTCH1, DYSF, RHOG, CXCR4, ANO9, ANK2, ATP1B1, TNFRSF1A, TSPAN15, DAB2, CDH2, MAP7, LDLRAP1, FGF13	655	277	16650	1.56006	1	0.458167	0.42474
GOTERM_BP_FAT	GO:0008361~regulation of cell size	12	1.52091	0.079403	CDH4, RARG, KDM1A, BCL11A, PLEK, ATP2B2, PLXNC1, FGF13, L1CAM, SLC12A7, PLXNA4, VEGFA	655	173	16650	1.76323	1	0.459413	0.425895
GOTERM_BP_FAT	GO:2000377~regulation of reactive oxygen species metabolic process	11	1.39417	0.0795047	HDAC4, GADD45A, PDGFB, F2RL1, PTGS2, THBS1, FOXO1, PAX2, HK2, KLF2, SNCA	655	153	16650	1.82757	1	0.459595	0.426064
GOTERM_BP_FAT	GO:0007266~Rho protein signal transduction	8	1.01394	0.0799398	LPAR6, C15ORF62, RHOG, ARHGAP29, F2RL1, EPS8L2, LPAR4, RHOB	655	95	16650	2.14062	1	0.461687	0.428003
GOTERM_BP_FAT	GO:0048710~regulation of astrocyte differentiation	4	0.506971	0.0803609	BIN1, CLCF1, LIF, HMGA2	655	26	16650	3.91075	1	0.461687	0.428003
GOTERM_BP_FAT	GO:0050820~positive regulation of coagulation	4	0.506971	0.0803609	SELP, PLEK, PLG, THBS1	655	26	16650	3.91075	1	0.461687	0.428003
GOTERM_BP_FAT	GO:0043372~positive regulation of CD4-positive, alpha-beta T cell differentiation	4	0.506971	0.0803609	ANXA1, IL23A, MYB, NLRP3	655	26	16650	3.91075	1	0.461687	0.428003
GOTERM_BP_FAT	GO:0042346~positive regulation of NF-kappaB import into nucleus	4	0.506971	0.0803609	IL23A, TLR9, PTGS2, ZNF268	655	26	16650	3.91075	1	0.461687	0.428003
GOTERM_BP_FAT	GO:0002369~T cell cytokine production	4	0.506971	0.0803609	IL31RA, NLRP3, XCL1, SLAMF1	655	26	16650	3.91075	1	0.461687	0.428003
GOTERM_BP_FAT	GO:0038066~p38MAPK cascade	4	0.506971	0.0803609	GADD45A, MAPKAPK2, MAP3K4, VEGFA	655	26	16650	3.91075	1	0.461687	0.428003
GOTERM_BP_FAT	GO:0032760~positive regulation of tumor necrosis factor production	6	0.760456	0.0814334	SPN, IL23A, MAPKAPK2, TLR9, THBS1, NFATC4	655	59	16650	2.58507	1	0.466618	0.432575
GOTERM_BP_FAT	GO:0001885~endothelial cell development	6	0.760456	0.0814334	PDE4D, ID1, F2RL1, STC1, S1PR2, TNFRSF1A	655	59	16650	2.58507	1	0.466618	0.432575
GOTERM_BP_FAT	GO:0022029~telencephalon cell migration	6	0.760456	0.0814334	DAB2IP, SLIT1, LHX6, SLIT2, FGF13, GLI3	655	59	16650	2.58507	1	0.466618	0.432575
GOTERM_BP_FAT	GO:0050854~regulation of antigen receptor-mediated signaling pathway	5	0.633714	0.0816383	CD300A, GCSAML, PLCL2, PTPRJ, CCR7	655	42	16650	3.02617	1	0.46675	0.432697
GOTERM_BP_FAT	GO:0043551~regulation of phosphatidylinositol 3-kinase activity	5	0.633714	0.0816383	FGR, CCKBR, DAB2IP, PDGFB, CCR7	655	42	16650	3.02617	1	0.46675	0.432697
GOTERM_BP_FAT	GO:0031214~biomineral tissue development	10	1.26743	0.0816706	SRGN, TBX1, MEF2C, MMP13, MATN1, ATP2B2, BCOR, PTGS2, PHEX, FOXO1	655	134	16650	1.897	1	0.46675	0.432697
GOTERM_BP_FAT	GO:0007492~endoderm development	7	0.887199	0.0818653	EOMES, DUSP4, MMP14, COL7A1, HMGA2, INHBA, MMP8	655	77	16650	2.3109	1	0.467454	0.43335
GOTERM_BP_FAT	GO:0050807~regulation of synapse organization	9	1.14068	0.0831453	MEF2C, CDH2, FLRT2, AMIGO2, DAB2IP, SLIT1, AGRN, ETV5, NFATC4	655	115	16650	1.98938	1	0.474349	0.439742
GOTERM_BP_FAT	GO:0030218~erythrocyte differentiation	8	1.01394	0.0834719	KDM1A, EPAS1, IKZF1, INHBA, GATA2, ZFPM1, KLF2, VEGFA	655	96	16650	2.11832	1	0.475418	0.440732
GOTERM_BP_FAT	GO:0001649~osteoblast differentiation	13	1.64766	0.0834861	HDAC4, MEF2C, PTCH1, LEF1, RORB, TMEM64, GLI3, NPPC, CREB3L1, ID1, ID3, IL6R, CTHRC1	655	195	16650	1.69466	1	0.475418	0.440732
GOTERM_BP_FAT	GO:0044744~protein targeting to nucleus	17	2.15463	0.0836235	JUN, JUP, ANGPT1, DAB2IP, PTGS2, GLI3, PPP3CA, DAB2, IL23A, BAMBI, SIX3, MXI1, TLR9, DACT3, TXNIP, NLRP3, ZNF268	655	280	16650	1.54335	1	0.475418	0.440732
GOTERM_BP_FAT	GO:0006606~protein import into nucleus	17	2.15463	0.0836235	JUN, JUP, ANGPT1, DAB2IP, PTGS2, GLI3, PPP3CA, DAB2, IL23A, BAMBI, SIX3, MXI1, TLR9, DACT3, TXNIP, NLRP3, ZNF268	655	280	16650	1.54335	1	0.475418	0.440732
GOTERM_BP_FAT	GO:0071216~cellular response to biotic stimulus	12	1.52091	0.0845028	CXCL10, MEF2C, CSF2, IRAK2, CCL20, CEBPE, GFI1, PDE4D, DAB2IP, TXNIP, NLRP3, TRIB1	655	175	16650	1.74308	1	0.48	0.44498
GOTERM_BP_FAT	GO:0071346~cellular response to interferon-gamma	10	1.26743	0.0846336	HLA-DRB5, CCL22, CCL3L1, CCL20, CCL4L2, NLRC5, XCL2, XCL1, PPARG, MID1	655	135	16650	1.88295	1	0.480325	0.445281
GOTERM_BP_FAT	GO:0070848~response to growth factor	33	4.18251	0.0848481	RYR2, BMP10, LEF1, PDGFB, FASLG, CHRDL1, THBS1, FGFRL1, FLRT2, GPC1, GRB10, RBPMS2, SLIT2, PDE8A, SNCA, TBX1, CCBE1, JUN, MEF2C, GALNT3, DAB2IP, RUNX3, PAX2, VEGFA, DAB2, EHD4, BAMBI, PARD3, ID1, MAPKAPK2, SPRY2, XCL1, FERMT2	655	634	16650	1.32312	1	0.481125	0.446023
GOTERM_BP_FAT	GO:0071219~cellular response to molecule of bacterial origin	11	1.39417	0.0849657	CXCL10, MEF2C, CSF2, IRAK2, CCL20, CEBPE, GFI1, PDE4D, DAB2IP, NLRP3, TRIB1	655	155	16650	1.80399	1	0.481374	0.446254
GOTERM_BP_FAT	GO:0014033~neural crest cell differentiation	7	0.887199	0.0859081	TBX1, LAMA5, MEF2C, RDH10, ALDH1A2, LEF1, HTR2B	655	78	16650	2.28127	1	0.485817	0.450373
GOTERM_BP_FAT	GO:0016266~O-glycan processing	6	0.760456	0.0861215	GALNT14, GALNT3, ST3GAL1, GALNT9, MUC5AC, GALNT8	655	60	16650	2.54198	1	0.485817	0.450373
GOTERM_BP_FAT	GO:0060113~inner ear receptor cell differentiation	6	0.760456	0.0861215	GABRB3, GABRB2, ATP2B2, MYO7A, TSHR, CTHRC1	655	60	16650	2.54198	1	0.485817	0.450373
GOTERM_BP_FAT	GO:0002260~lymphocyte homeostasis	6	0.760456	0.0861215	GPR174, MEF2C, BCL2L11, SIT1, TSC22D3, RAG1	655	60	16650	2.54198	1	0.485817	0.450373
GOTERM_BP_FAT	GO:0003300~cardiac muscle hypertrophy	6	0.760456	0.0861215	HDAC4, RYR2, PPP3CA, MEF2C, BMP10, HTR2B	655	60	16650	2.54198	1	0.485817	0.450373
GOTERM_BP_FAT	GO:0060537~muscle tissue development	21	2.6616	0.086311	EOMES, DSP, TBX1, HDAC4, RYR2, BMP10, MEF2C, TENM4, TSC22D3, LEF1, KCNAB1, HDAC9, VEGFA, PPP3CA, WT1, GPC1, ALDH1A2, MYO18B, FLNB, ZFPM1, ATF3	655	367	16650	1.45454	1	0.486467	0.450975
GOTERM_BP_FAT	GO:1902593~single-organism nuclear import	17	2.15463	0.0868505	JUN, JUP, ANGPT1, DAB2IP, PTGS2, GLI3, PPP3CA, DAB2, IL23A, BAMBI, SIX3, MXI1, TLR9, DACT3, TXNIP, NLRP3, ZNF268	655	281	16650	1.53786	1	0.488763	0.453103
GOTERM_BP_FAT	GO:0001657~ureteric bud development	8	1.01394	0.0870921	LAMA5, ARG2, WT1, PTCH1, SLIT2, GLI3, PAX2, VEGFA	655	97	16650	2.09648	1	0.488763	0.453103
GOTERM_BP_FAT	GO:0030804~positive regulation of cyclic nucleotide biosynthetic process	8	1.01394	0.0870921	NPPC, ADCYAP1, PTGIR, ADORA2A, AVPR2, ADM, ADCY1, TSHR	655	97	16650	2.09648	1	0.488763	0.453103
GOTERM_BP_FAT	GO:0007613~memory	8	1.01394	0.0870921	NETO1, MDK, DBH, ADCY1, FGF13, SGK1, PTGS2, SLC8A2	655	97	16650	2.09648	1	0.488763	0.453103
GOTERM_BP_FAT	GO:0050715~positive regulation of cytokine secretion	8	1.01394	0.0870921	FGR, AIM2, IL26, CASP1, HTR2B, NLRP3, F2RL1, SLAMF1	655	97	16650	2.09648	1	0.488763	0.453103
GOTERM_BP_FAT	GO:0034260~negative regulation of GTPase activity	5	0.633714	0.0873574	ADCYAP1, DAB2IP, SPRY2, SLIT2, CPEB2	655	43	16650	2.9558	1	0.489007	0.45333
GOTERM_BP_FAT	GO:0042348~NF-kappaB import into nucleus	5	0.633714	0.0873574	IL23A, TLR9, NLRP3, PTGS2, ZNF268	655	43	16650	2.9558	1	0.489007	0.45333
GOTERM_BP_FAT	GO:0046683~response to organophosphorus	10	1.26743	0.0876602	JUN, KDM1A, WT1, PDE4D, CASP1, AKAP7, STC1, DNTT, AGXT, PTGS2	655	136	16650	1.86911	1	0.489007	0.45333
GOTERM_BP_FAT	GO:0010675~regulation of cellular carbohydrate metabolic process	10	1.26743	0.0876602	HDAC4, PPP1R3F, PLEK, RORC, GRB10, IGF2, CBFA2T3, FOXO1, NTSR1, SNCA	655	136	16650	1.86911	1	0.489007	0.45333
GOTERM_BP_FAT	GO:0043368~positive T cell selection	4	0.506971	0.0878836	IL23A, ZFPM1, LY9, BATF	655	27	16650	3.7659	1	0.489007	0.45333
GOTERM_BP_FAT	GO:0010591~regulation of lamellipodium assembly	4	0.506971	0.0878836	HDAC4, FSCN1, SLIT2, SSH3	655	27	16650	3.7659	1	0.489007	0.45333
GOTERM_BP_FAT	GO:0008299~isoprenoid biosynthetic process	4	0.506971	0.0878836	FDPS, NUS1, RDH10, ALDH1A2	655	27	16650	3.7659	1	0.489007	0.45333
GOTERM_BP_FAT	GO:1902893~regulation of pri-miRNA transcription from RNA polymerase II promoter	4	0.506971	0.0878836	JUN, PDGFB, TEAD1, NFATC4	655	27	16650	3.7659	1	0.489007	0.45333
GOTERM_BP_FAT	GO:2000171~negative regulation of dendrite development	4	0.506971	0.0878836	PPP3CA, BCL11A, ID1, NFATC4	655	27	16650	3.7659	1	0.489007	0.45333
GOTERM_BP_FAT	GO:0001963~synaptic transmission, dopaminergic	4	0.506971	0.0878836	RAB3B, ADORA2A, PTGS2, SNCA	655	27	16650	3.7659	1	0.489007	0.45333
GOTERM_BP_FAT	GO:0046824~positive regulation of nucleocytoplasmic transport	9	1.14068	0.0897495	PPP3CA, DAB2, JUP, IL23A, BAMBI, TLR9, PTGS2, ZNF268, GLI3	655	117	16650	1.95537	1	0.49805	0.461714
GOTERM_BP_FAT	GO:0030819~positive regulation of cAMP biosynthetic process	7	0.887199	0.0900588	ADCYAP1, PTGIR, ADORA2A, AVPR2, ADM, ADCY1, TSHR	655	79	16650	2.25239	1	0.49805	0.461714
GOTERM_BP_FAT	GO:0072182~regulation of nephron tubule epithelial cell differentiation	3	0.380228	0.0902707	LIF, CD24, PAX2	655	13	16650	5.86612	1	0.49805	0.461714
GOTERM_BP_FAT	GO:0021843~substrate-independent telencephalic tangential interneuron migration	3	0.380228	0.0902707	SLIT1, LHX6, SLIT2	655	13	16650	5.86612	1	0.49805	0.461714
GOTERM_BP_FAT	GO:0032740~positive regulation of interleukin-17 production	3	0.380228	0.0902707	IL23A, PRKCQ, LY9	655	13	16650	5.86612	1	0.49805	0.461714
GOTERM_BP_FAT	GO:0021826~substrate-independent telencephalic tangential migration	3	0.380228	0.0902707	SLIT1, LHX6, SLIT2	655	13	16650	5.86612	1	0.49805	0.461714
GOTERM_BP_FAT	GO:0097152~mesenchymal cell apoptotic process	3	0.380228	0.0902707	TBX1, PAX2, ETV6	655	13	16650	5.86612	1	0.49805	0.461714
GOTERM_BP_FAT	GO:0031274~positive regulation of pseudopodium assembly	3	0.380228	0.0902707	C15ORF62, F2RL1, CCR7	655	13	16650	5.86612	1	0.49805	0.461714
GOTERM_BP_FAT	GO:1902285~semaphorin-plexin signaling pathway involved in neuron projection guidance	3	0.380228	0.0902707	PLXNB2, PLXNC1, PLXNA4	655	13	16650	5.86612	1	0.49805	0.461714
GOTERM_BP_FAT	GO:0045651~positive regulation of macrophage differentiation	3	0.380228	0.0902707	CASP8, LIF, TRIB1	655	13	16650	5.86612	1	0.49805	0.461714
GOTERM_BP_FAT	GO:0006163~purine nucleotide metabolic process	29	3.67554	0.0905791	HDAC4, CXCL9, GPR87, HTR2B, ADM, ADCY1, THBS1, HK2, NUDT11, NPPC, ATP6V0A4, PDE8A, SNCA, PTGIR, PDE4D, PDE4C, AVPR2, ATP2B2, ATP1B1, CBFA2T3, TSHR, VEGFA, CXCL10, ADCYAP1, PDE10A, ADORA2A, ADSSL1, ALDOC, UQCRC2	655	547	16650	1.34767	1	0.499259	0.462834
GOTERM_BP_FAT	GO:0072163~mesonephric epithelium development	8	1.01394	0.0908003	LAMA5, ARG2, WT1, PTCH1, SLIT2, GLI3, PAX2, VEGFA	655	98	16650	2.07509	1	0.499259	0.462834
GOTERM_BP_FAT	GO:0072164~mesonephric tubule development	8	1.01394	0.0908003	LAMA5, ARG2, WT1, PTCH1, SLIT2, GLI3, PAX2, VEGFA	655	98	16650	2.07509	1	0.499259	0.462834
GOTERM_BP_FAT	GO:0048863~stem cell differentiation	8	1.01394	0.0908003	EOMES, FOXA1, SIX3, LIF, HMGA2, JARID2, PAX2, BATF	655	98	16650	2.07509	1	0.499259	0.462834
GOTERM_BP_FAT	GO:1905039~carboxylic acid transmembrane transport	6	0.760456	0.090948	SLC6A19, SLC32A1, SLC7A5P2, SLC1A4, SLC38A3, THBS1	655	61	16650	2.50031	1	0.499259	0.462834
GOTERM_BP_FAT	GO:1903557~positive regulation of tumor necrosis factor superfamily cytokine production	6	0.760456	0.090948	SPN, IL23A, MAPKAPK2, TLR9, THBS1, NFATC4	655	61	16650	2.50031	1	0.499259	0.462834
GOTERM_BP_FAT	GO:0070201~regulation of establishment of protein localization	41	5.19645	0.0919872	IL26, HTR2B, ITPR1, PTGS2, GLI3, UBE2J1, PPP3CA, CASP8, SOCS1, BCL2L11, MXI1, CASP1, DACT3, NLRP3, CCR7, IL36RN, LDLRAP1, ZNF268, SOX4, SLAMF1, SRGN, PLK3, HLA-DRB5, ANXA1, JUP, ANGPT1, TNFRSF9, IL1R2, IL13, DAB2IP, RHOG, PTPN14, FGR, DAB2, AIM2, ADORA2A, BAMBI, IL23A, TLR9, F2RL1, RHOU	655	820	16650	1.27099	1	0.504541	0.46773
GOTERM_BP_FAT	GO:0071383~cellular response to steroid hormone stimulus	15	1.90114	0.0921483	FOXA1, RARG, ANXA1, LEF1, RORC, HMGA2, STC1, RORB, SSTR3, FOXO1, ESR2, ADCYAP1, DAB2, KLF9, PPARG	655	241	16650	1.58215	1	0.504578	0.467765
GOTERM_BP_FAT	GO:0060828~regulation of canonical Wnt signaling pathway	15	1.90114	0.0921483	JUP, LEF1, DAB2IP, NRARP, TMEM64, FOXO1, GLI3, DAB2, CDH2, BAMBI, DACT3, NOTUM, CDK14, SOX4, CTHRC1	655	241	16650	1.58215	1	0.504578	0.467765
GOTERM_BP_FAT	GO:0009913~epidermal cell differentiation	12	1.52091	0.0925235	DSP, CSTA, ANXA1, KRT17, PTCH1, TCHH, TXNIP, KAZN, ATP2B2, FLNB, MYO7A, FOSL2	655	178	16650	1.7137	1	0.506208	0.469276
GOTERM_BP_FAT	GO:0010721~negative regulation of cell development	18	2.28137	0.0930399	FOXA1, KDM1A, BCL11A, GFI1, DAB2IP, DTX1, HMGA2, GLI3, NFATC4, NPPC, STX1B, ADCYAP1, PPP3CA, SIX3, ID1, DACT3, SLIT2, FGF13	655	306	16650	1.49529	1	0.508562	0.471458
GOTERM_BP_FAT	GO:0021795~cerebral cortex cell migration	5	0.633714	0.0932649	DAB2IP, LHX6, SLIT2, FGF13, GLI3	655	44	16650	2.88862	1	0.508562	0.471458
GOTERM_BP_FAT	GO:0009409~response to cold	5	0.633714	0.0932649	CXCL10, CASP8, ADM, PPARG, FOXO1	655	44	16650	2.88862	1	0.508562	0.471458
GOTERM_BP_FAT	GO:0051972~regulation of telomerase activity	5	0.633714	0.0932649	PIF1, PARM1, PRKCQ, PPARG, MAP3K4	655	44	16650	2.88862	1	0.508562	0.471458
GOTERM_BP_FAT	GO:0006814~sodium ion transport	13	1.64766	0.093567	SLC23A1, ATP1B4, NEDD4L, KLHL3, ATP1B1, SLC8A2, SLC9A2, SLC6A8, SCNN1A, SGK1, SLC38A3, FGF13, PTPN3	655	199	16650	1.66059	1	0.509784	0.472591
GOTERM_BP_FAT	GO:0021536~diencephalon development	7	0.887199	0.0943167	ADCYAP1, KDM1A, ALDH1A2, SIX3, LEF1, HMGA2, GATA2	655	80	16650	2.22424	1	0.513014	0.475585
GOTERM_BP_FAT	GO:0048644~muscle organ morphogenesis	7	0.887199	0.0943167	TBX1, DSP, RYR2, BMP10, LIF, ARID5B, ZFPM1	655	80	16650	2.22424	1	0.513014	0.475585
GOTERM_BP_FAT	GO:0008045~motor neuron axon guidance	4	0.506971	0.09569	SLIT1, SLIT2, PLXNC1, PLXNA4	655	28	16650	3.63141	1	0.519095	0.481223
GOTERM_BP_FAT	GO:0045622~regulation of T-helper cell differentiation	4	0.506971	0.09569	ANXA1, IL23A, MYB, NLRP3	655	28	16650	3.63141	1	0.519095	0.481223
GOTERM_BP_FAT	GO:1900744~regulation of p38MAPK cascade	4	0.506971	0.09569	GADD45A, DAB2IP, MAP3K4, VEGFA	655	28	16650	3.63141	1	0.519095	0.481223
GOTERM_BP_FAT	GO:0014897~striated muscle hypertrophy	6	0.760456	0.095911	HDAC4, RYR2, PPP3CA, MEF2C, BMP10, HTR2B	655	62	16650	2.45999	1	0.519095	0.481223
GOTERM_BP_FAT	GO:0021885~forebrain cell migration	6	0.760456	0.095911	DAB2IP, SLIT1, LHX6, SLIT2, FGF13, GLI3	655	62	16650	2.45999	1	0.519095	0.481223
GOTERM_BP_FAT	GO:1900076~regulation of cellular response to insulin stimulus	6	0.760456	0.095911	REPIN1, RNASEL, SOCS1, GRB10, IGF2, PRKCQ	655	62	16650	2.45999	1	0.519095	0.481223
GOTERM_BP_FAT	GO:0007156~homophilic cell adhesion via plasma membrane adhesion molecules	11	1.39417	0.0965557	SDK1, CDH4, PCDHB2, CDH2, PCDH9, AMIGO2, FAT2, PLXNB2, PCDH12, PCDH18, CD200	655	159	16650	1.75861	1	0.52179	0.483722
GOTERM_BP_FAT	GO:0030216~keratinocyte differentiation	9	1.14068	0.0966486	DSP, CSTA, ANXA1, KRT17, TCHH, TXNIP, KAZN, FLNB, FOSL2	655	119	16650	1.92251	1	0.52179	0.483722
GOTERM_BP_FAT	GO:0010771~negative regulation of cell morphogenesis involved in differentiation	9	1.14068	0.0966486	FOXA1, PPP3CA, BCL11A, ID1, DAB2IP, DACT3, SLIT2, FGF13, NFATC4	655	119	16650	1.92251	1	0.52179	0.483722
GOTERM_BP_FAT	GO:1903828~negative regulation of cellular protein localization	10	1.26743	0.0971209	DAB2, ANGPT1, MXI1, DAB2IP, DACT3, NLRP3, NEDD4L, ZNF268, SOX4, UBE2J1	655	139	16650	1.82877	1	0.523908	0.485684
GOTERM_BP_FAT	GO:0002460~adaptive immune response based on somatic recombination of immune receptors built from immunoglobulin superfamily domains	17	2.15463	0.0975122	MEF2C, HLA-DRB5, ANXA1, EBI3, LEF1, RORC, IL31RA, LY9, BATF, SPN, IL23A, CLCF1, SUSD4, XCL1, NLRP3, PRKCQ, SLAMF1	655	286	16650	1.51097	1	0.525585	0.487239
GOTERM_BP_FAT	GO:0072521~purine-containing compound metabolic process	30	3.80228	0.0981926	HDAC4, CXCL9, KDM1A, GPR87, HTR2B, ADM, ADCY1, THBS1, HK2, NUDT11, NPPC, ATP6V0A4, PDE8A, SNCA, PTGIR, PDE4D, PDE4C, AVPR2, ATP2B2, ATP1B1, CBFA2T3, TSHR, VEGFA, CXCL10, ADCYAP1, PDE10A, ADORA2A, ADSSL1, ALDOC, UQCRC2	655	575	16650	1.32625	1	0.528816	0.490235
GOTERM_BP_FAT	GO:0001936~regulation of endothelial cell proliferation	8	1.01394	0.0984784	JUN, ANGPT1, ALDH1A2, PDGFB, HTR2B, NRARP, THBS1, VEGFA	655	100	16650	2.03359	1	0.529483	0.490853
GOTERM_BP_FAT	GO:1902807~negative regulation of cell cycle G1/S phase transition	8	1.01394	0.0984784	PLK3, CDKN1B, SLFN11, GADD45A, SUSD2, TNKS1BP1, MYO16, SOX4	655	100	16650	2.03359	1	0.529483	0.490853
GOTERM_BP_FAT	GO:0031623~receptor internalization	7	0.887199	0.0986809	ANGPT1, HTR2B, CD9, ADM, LDLRAP1, SNCA, VEGFA	655	81	16650	2.19678	1	0.529701	0.491055
GOTERM_BP_FAT	GO:0031295~T cell costimulation	7	0.887199	0.0986809	SPN, PRR5, HLA-DRB5, TMIGD2, CCR7, MAP3K8, CD24	655	81	16650	2.19678	1	0.529701	0.491055
GOTERM_BP_FAT	GO:0031018~endocrine pancreas development	5	0.633714	0.0993565	RFX8, ANXA1, IL6R, SOX4, FOXO1	655	45	16650	2.82443	1	0.531147	0.492395
GOTERM_BP_FAT	GO:0042312~regulation of vasodilation	5	0.633714	0.0993565	NPPC, ADCYAP1, EPHX2, F2RL1, ADM	655	45	16650	2.82443	1	0.531147	0.492395
GOTERM_BP_FAT	GO:0002704~negative regulation of leukocyte mediated immunity	5	0.633714	0.0993565	SPN, CD300A, SUSD4, XCL1, SLAMF1	655	45	16650	2.82443	1	0.531147	0.492395
GOTERM_BP_FAT	GO:2000107~negative regulation of leukocyte apoptotic process	5	0.633714	0.0993565	TSC22D3, RORC, CCR7, PRKCQ, RAG1	655	45	16650	2.82443	1	0.531147	0.492395
GOTERM_BP_FAT	GO:0034308~primary alcohol metabolic process	5	0.633714	0.0993565	ACSS2, ALDH2, RDH8, RDH10, ALDH1A2	655	45	16650	2.82443	1	0.531147	0.492395
GOTERM_BP_FAT	GO:0032868~response to insulin	15	1.90114	0.0995702	RNASEL, IGF2, ADM, SLC2A4, RETN, HDAC9, FOXO1, REPIN1, SOCS1, TNFSF10, GRB10, PRKCQ, ATP6V0A4, PPARG, CPEB2	655	244	16650	1.5627	1	0.531855	0.493052

## Sheet: RTK3 and TFII-I shRNA GO
Category	Term	Count	%	PValue	Genes	List Total	Pop Hits	Pop Total	Fold Enrichment	Bonferroni	Benjamini	FDR
GOTERM_BP_FAT	GO:0045321~leukocyte activation	26	11.0169	2.02603e-06	CSF2, LEF1, PRF1, NRARP, IKZF1, CD1C, HDAC9, SPN, PPP3CA, CCND3, IL1RL2, SIT1, MYB, SLAMF7, NLRP3, SOX4, PAG1, SLAMF1, JUN, ANXA1, IL13, INHBA, FGR, TMIGD2, IL23A, PRKCQ	195	747	16650	2.97189	0.00757887	0.00452271	0.00433
GOTERM_BP_FAT	GO:0001775~cell activation	29	12.2881	2.4089e-06	CSF2, DGKA, LEF1, PDGFB, PRF1, NRARP, IKZF1, CD1C, HDAC9, SPN, PPP3CA, CCND3, IL1RL2, SIT1, MYB, SLAMF7, NLRP3, SOX4, PAG1, SLAMF1, JUN, ANXA1, IL13, INHBA, FGR, CXCL10, TMIGD2, IL23A, PRKCQ	195	910	16650	2.72105	0.00900465	0.00452271	0.00433
GOTERM_BP_FAT	GO:0046649~lymphocyte activation	23	9.74576	6.17273e-06	ANXA1, LEF1, IL13, PRF1, NRARP, INHBA, IKZF1, CD1C, HDAC9, SPN, PPP3CA, CCND3, IL1RL2, TMIGD2, SIT1, IL23A, MYB, NLRP3, SLAMF7, PRKCQ, SOX4, PAG1, SLAMF1	195	643	16650	3.05419	0.0229121	0.00620166	0.0059374
GOTERM_BP_FAT	GO:0023051~regulation of signaling	62	26.2712	8.06354e-06	FOXA1, RAB3B, IL22, CXCL9, CSF2, CCL4L2, SLA, NRARP, DBH, PREX2, NPPC, PPP3CA, RASSF2, RGS3, NETO1, PLAU, TNFSF10, DACT2, SOX4, ANXA1, IL13, TMC8, ATP1B1, FGR, STX1B, IL23A, TLR9, PRKCQ, RHOU, RHOV, MGLL, ATF3, SHC2, CHRNA3, CCL3L1, RGS16, LEF1, PDGFB, NLRC5, RETN, LPAR4, CXXC4, FGD5, IRAK2, GPC1, KCNMB4, NLRP3, PAG1, SLAMF1, JUN, ANGPT1, CCL20, GADD45A, ARHGEF39, PTCH1, LIF, INHBA, ARHGAP25, NFA…	195	3070	16650	1.72438	0.0298249	0.00620166	0.0059374
GOTERM_BP_FAT	GO:0065009~regulation of molecular function	59	25	8.25786e-06	FOXA1, CSF2, CCL4L2, PREX2, PPP3CA, CCND3, RASSF2, RGS3, CCND2, PLAU, RASGEF1C, TNFSF10, PIM1, SPINK2, ANXA1, IL13, ARID5B, TMC8, GFRA1, ATP1B1, FGR, PSRC1, IL23A, TLR9, TXNIP, PRKCQ, SGK1, PIF1, SPTBN5, SHC2, CSTA, CHRNA3, AHNAK, CCL3L1, PCOLCE2, GPR87, RGS16, LEF1, PDGFB, NLRC5, FGD5, IRAK2, SH3BP5, NLRP3, SLAMF1, TMEM132D, JUN, ANGPT1, CCL20, GADD45A, ARHGEF39, GZMA, PTCH1, LIF, ARHGAP25, NFAT…	195	2863	16650	1.75959	0.0305326	0.00620166	0.0059374
GOTERM_BP_FAT	GO:0006955~immune response	38	16.1017	1.93396e-05	IL22, CXCL9, CSF2, CCL3L1, CCL4L2, LEF1, NLRC5, PRF1, CD1C, CD1A, SIRPB1, SPN, PPP3CA, IL1RL2, IRAK2, SIT1, MYB, TNFSF10, SLAMF7, NLRP3, PAG1, SLAMF1, JUN, ANXA1, ANGPT1, CCL20, GZMA, KRT1, IL13, STYK1, LIF, PARP9, FGR, CXCL10, TMIGD2, IL23A, TLR9, PRKCQ	195	1551	16650	2.09195	0.0700468	0.0110748	0.0106029
GOTERM_BP_FAT	GO:0010646~regulation of cell communication	60	25.4237	2.06454e-05	FOXA1, RAB3B, IL22, CXCL9, CSF2, CCL4L2, SLA, NRARP, DBH, PREX2, PPP3CA, RASSF2, RGS3, NETO1, PLAU, TNFSF10, DACT2, SOX4, ANXA1, IL13, TMC8, FGR, STX1B, IL23A, TLR9, PRKCQ, RHOU, RHOV, MGLL, ATF3, SHC2, CHRNA3, CCL3L1, RGS16, LEF1, PDGFB, NLRC5, RETN, LPAR4, CXXC4, FGD5, IRAK2, GPC1, KCNMB4, NLRP3, PAG1, SLAMF1, JUN, ANGPT1, CCL20, GADD45A, ARHGEF39, PTCH1, LIF, INHBA, ARHGAP25, NFATC4, CXCL10, L…	195	3020	16650	1.69638	0.0745954	0.0110748	0.0106029
GOTERM_BP_FAT	GO:0002521~leukocyte differentiation	18	7.62712	4.13184e-05	JUN, ANXA1, CSF2, LEF1, LIF, NRARP, INHBA, IKZF1, HDAC9, CBFA2T3, SPN, IL1RL2, RASSF2, IL23A, MYB, NLRP3, SOX4, SLAMF1	195	474	16650	3.24245	0.143717	0.0185405	0.0177505
GOTERM_BP_FAT	GO:0001817~regulation of cytokine production	20	8.47458	4.62191e-05	ANXA1, CSF2, MAST4, ANGPT1, CCL20, LEF1, IL13, NLRC5, INHBA, NFATC4, UBE2J1, SPN, FGR, IL1RL2, TMIGD2, IL23A, TLR9, NLRP3, PRKCQ, SLAMF1	195	577	16650	2.95961	0.15933	0.0185405	0.0177505
GOTERM_BP_FAT	GO:0001816~cytokine production	21	8.89831	4.93756e-05	ANXA1, CSF2, MAST4, ANGPT1, CCL20, LEF1, IL13, NLRC5, INHBA, DBH, NFATC4, UBE2J1, SPN, FGR, IL1RL2, TMIGD2, IL23A, TLR9, NLRP3, PRKCQ, SLAMF1	195	631	16650	2.84164	0.169236	0.0185405	0.0177505
GOTERM_BP_FAT	GO:0031325~positive regulation of cellular metabolic process	56	23.7288	5.65822e-05	FOXA1, CXCL9, CSF2, CCL4L2, IKZF1, RORB, IKZF4, SPN, NPPC, PPP3CA, CCND3, RASSF2, CCND2, MYB, TNFSF10, PIM1, SOX4, ANXA1, IL13, ATP1B4, CBFA2T3, ETV6, FGR, PSRC1, IL23A, TLR9, PRKCQ, ATF3, SHC2, CHRNA3, CCL3L1, PCOLCE2, LEF1, PDGFB, NLRC5, IRAK2, NLRP3, CGA, SLC38A3, SLAMF1, JUN, ANGPT1, CCL20, GADD45A, PTCH1, LIF, MICAL2, INHBA, MAFA, NFATC4, FOSL2, CXCL10, EHD4, KRT17, WT1, HOXD8	195	2839	16650	1.68423	0.191417	0.0193151	0.0184921
GOTERM_BP_FAT	GO:0035556~intracellular signal transduction	53	22.4576	7.48499e-05	RAB3B, IL22, CXCL9, CSF2, MAST4, DGKA, CCL4L2, PREX2, PPP3CA, RASSF2, RGS3, RASGEF1C, TNFSF10, TNKS1BP1, SOX4, IL13, GFRA1, ATP1B1, ARL4C, FGR, IL23A, TLR9, PRKCQ, RHOU, RHOV, SGK1, ATF3, SPTBN5, SHC2, CCL3L1, BCL2A1, PDGFB, LPAR4, FGD5, IRAK2, SH3BP5, NLRP3, PAG1, SLAMF1, JUN, ANGPT1, CCL20, GADD45A, ARHGEF39, LIF, INHBA, CORO2A, MAFA, ARHGAP25, NFATC4, CXCL10, LPAR6, ID1	195	2657	16650	1.70319	0.245026	0.0217652	0.0208378
GOTERM_BP_FAT	GO:0009966~regulation of signal transduction	54	22.8814	7.56539e-05	FOXA1, IL22, CXCL9, CSF2, CCL4L2, SLA, NRARP, DBH, PREX2, RASSF2, RGS3, NETO1, PLAU, TNFSF10, DACT2, SOX4, IL13, TMC8, FGR, STX1B, IL23A, TLR9, PRKCQ, RHOU, RHOV, MGLL, ATF3, SHC2, CCL3L1, RGS16, LEF1, PDGFB, NLRC5, LPAR4, CXXC4, FGD5, IRAK2, GPC1, NLRP3, PAG1, SLAMF1, JUN, ANGPT1, CCL20, GADD45A, ARHGEF39, PTCH1, LIF, INHBA, ARHGAP25, NFATC4, CXCL10, LPAR6, ID1	195	2728	16650	1.69016	0.247302	0.0217652	0.0208378
GOTERM_BP_FAT	GO:0010562~positive regulation of phosphorus metabolic process	28	11.8644	8.71631e-05	SHC2, CHRNA3, CXCL9, CSF2, CCL3L1, CCL4L2, PDGFB, SPN, NPPC, CCND3, RASSF2, CCND2, IRAK2, PIM1, SLAMF1, JUN, ANGPT1, CCL20, GADD45A, IL13, LIF, INHBA, FGR, CXCL10, PSRC1, EHD4, IL23A, TLR9	195	1049	16650	2.27909	0.279141	0.0217652	0.0208378
GOTERM_BP_FAT	GO:0045937~positive regulation of phosphate metabolic process	28	11.8644	8.71631e-05	SHC2, CHRNA3, CXCL9, CSF2, CCL3L1, CCL4L2, PDGFB, SPN, NPPC, CCND3, RASSF2, CCND2, IRAK2, PIM1, SLAMF1, JUN, ANGPT1, CCL20, GADD45A, IL13, LIF, INHBA, FGR, CXCL10, PSRC1, EHD4, IL23A, TLR9	195	1049	16650	2.27909	0.279141	0.0217652	0.0208378
GOTERM_BP_FAT	GO:0042127~regulation of cell proliferation	36	15.2542	0.000105882	CXCL9, CSF2, CCL3L1, LEF1, PDGFB, NRARP, DBH, RETN, FGFRL1, SPN, NPPC, CCND2, PLAU, CGA, SOX4, SLAMF1, JUN, ANXA1, ANGPT1, PTCH1, IL13, STYK1, LIF, INHBA, CBFA2T3, FOSL2, FGR, CXCL10, TMIGD2, WT1, IL23A, ID1, TXNIP, PRKCQ, SGK1, ATF3	195	1552	16650	1.98057	0.328074	0.0217652	0.0208378
GOTERM_BP_FAT	GO:0009967~positive regulation of signal transduction	34	14.4068	0.000108724	FOXA1, IL22, SHC2, CXCL9, CSF2, CCL3L1, CCL4L2, NLRC5, PDGFB, SLA, NRARP, LPAR4, RASSF2, NETO1, IRAK2, TNFSF10, SOX4, PAG1, SLAMF1, JUN, ANGPT1, CCL20, GADD45A, IL13, LIF, INHBA, NFATC4, FGR, CXCL10, STX1B, IL23A, LPAR6, TLR9, ATF3	195	1428	16650	2.03297	0.335208	0.0217652	0.0208378
GOTERM_BP_FAT	GO:0010647~positive regulation of cell communication	36	15.2542	0.000110005	FOXA1, RAB3B, IL22, SHC2, CXCL9, CSF2, CCL3L1, CCL4L2, NLRC5, PDGFB, SLA, NRARP, RETN, LPAR4, RASSF2, NETO1, IRAK2, TNFSF10, SOX4, PAG1, SLAMF1, JUN, ANGPT1, CCL20, GADD45A, IL13, LIF, INHBA, NFATC4, FGR, CXCL10, STX1B, IL23A, LPAR6, TLR9, ATF3	195	1555	16650	1.97675	0.338399	0.0217652	0.0208378
GOTERM_BP_FAT	GO:0009893~positive regulation of metabolic process	58	24.5763	0.000110751	FOXA1, CXCL9, CSF2, CCL4L2, IKZF1, RORB, IKZF4, SPN, NPPC, PPP3CA, CCND3, RASSF2, CCND2, MYB, TNFSF10, PIM1, SOX4, ANXA1, IL13, ATP1B4, CBFA2T3, ETV6, FGR, PSRC1, IL23A, TLR9, PRKCQ, ATF3, SHC2, CHRNA3, CCL3L1, PCOLCE2, LEF1, PDGFB, NLRC5, RETN, IRAK2, NLRP3, CGA, SLC38A3, SLAMF1, JUN, ANGPT1, CCL20, GADD45A, PTCH1, LIF, MICAL2, INHBA, MAFA, NFATC4, FOSL2, CXCL10, EHD4, KRT17, WT1, ID1, HOXD8	195	3052	16650	1.62264	0.340249	0.0217652	0.0208378
GOTERM_BP_FAT	GO:0050790~regulation of catalytic activity	48	20.339	0.000119237	PIF1, CSTA, SPTBN5, SHC2, CHRNA3, CSF2, CCL3L1, PCOLCE2, GPR87, CCL4L2, RGS16, LEF1, NLRC5, PDGFB, PREX2, CCND3, FGD5, RASSF2, RGS3, CCND2, IRAK2, RASGEF1C, TNFSF10, PIM1, SH3BP5, NLRP3, SLAMF1, TMEM132D, JUN, SPINK2, ANXA1, ANGPT1, CCL20, GADD45A, ARHGEF39, GZMA, IL13, GFRA1, ATP1B1, ARHGAP25, FGR, CXCL10, PSRC1, IL23A, TLR9, TXNIP, PRKCQ, SGK1	195	2357	16650	1.73885	0.360942	0.0217652	0.0208378
GOTERM_BP_FAT	GO:0023056~positive regulation of signaling	36	15.2542	0.000121723	FOXA1, RAB3B, IL22, SHC2, CXCL9, CSF2, CCL3L1, CCL4L2, NLRC5, PDGFB, SLA, NRARP, RETN, LPAR4, RASSF2, NETO1, IRAK2, TNFSF10, SOX4, PAG1, SLAMF1, JUN, ANGPT1, CCL20, GADD45A, IL13, LIF, INHBA, NFATC4, FGR, CXCL10, STX1B, IL23A, LPAR6, TLR9, ATF3	195	1563	16650	1.96663	0.366882	0.0217652	0.0208378
GOTERM_BP_FAT	GO:0030097~hemopoiesis	22	9.32203	0.000149171	JUN, ANXA1, CSF2, ANGPT1, LEF1, PDGFB, LIF, NRARP, INHBA, IKZF1, HDAC9, CBFA2T3, ETV6, SPN, IL1RL2, RASSF2, IL23A, MYB, DACT2, NLRP3, SOX4, SLAMF1	195	739	16650	2.5419	0.428893	0.0254607	0.0243759
GOTERM_BP_FAT	GO:0045944~positive regulation of transcription from RNA polymerase II promoter	27	11.4407	0.000192464	FOXA1, LEF1, NLRC5, PDGFB, IKZF1, IKZF4, PPP3CA, MYB, NLRP3, SLC38A3, CGA, SOX4, JUN, LIF, ATP1B4, MICAL2, INHBA, MAFA, ETV6, NFATC4, FOSL2, CXCL10, WT1, IL23A, TLR9, ATF3, HOXD8	195	1041	16650	2.21459	0.514595	0.0286201	0.0274006
GOTERM_BP_FAT	GO:0007159~leukocyte cell-cell adhesion	17	7.20339	0.000210753	ANXA1, LEF1, NRARP, CD1C, SPN, PPP3CA, CCND3, IL1RL2, TMIGD2, SIT1, IL23A, MYB, NLRP3, PRKCQ, SOX4, PAG1, SLAMF1	195	491	16650	2.95629	0.546818	0.0286201	0.0274006
GOTERM_BP_FAT	GO:0019220~regulation of phosphate metabolic process	36	15.2542	0.000216436	SHC2, CHRNA3, CXCL9, CSF2, CCL3L1, GPR87, CCL4L2, NLRC5, PDGFB, SPN, NPPC, CCND3, RASSF2, RGS3, CCND2, IRAK2, PIM1, SH3BP5, SLAMF1, TMEM132D, JUN, ANGPT1, CCL20, GADD45A, IL13, LIF, INHBA, CBFA2T3, FGR, CXCL10, PSRC1, EHD4, IL23A, ID1, TLR9, ATF3	195	1610	16650	1.90922	0.556388	0.0286201	0.0274006
GOTERM_BP_FAT	GO:0051174~regulation of phosphorus metabolic process	36	15.2542	0.000219026	SHC2, CHRNA3, CXCL9, CSF2, CCL3L1, GPR87, CCL4L2, NLRC5, PDGFB, SPN, NPPC, CCND3, RASSF2, RGS3, CCND2, IRAK2, PIM1, SH3BP5, SLAMF1, TMEM132D, JUN, ANGPT1, CCL20, GADD45A, IL13, LIF, INHBA, CBFA2T3, FGR, CXCL10, PSRC1, EHD4, IL23A, ID1, TLR9, ATF3	195	1611	16650	1.90804	0.560683	0.0286201	0.0274006
GOTERM_BP_FAT	GO:0042327~positive regulation of phosphorylation	25	10.5932	0.000220648	SHC2, CHRNA3, CSF2, CCL3L1, CCL4L2, PDGFB, SPN, CCND3, RASSF2, CCND2, IRAK2, PIM1, SLAMF1, JUN, ANGPT1, CCL20, GADD45A, IL13, LIF, INHBA, FGR, PSRC1, EHD4, IL23A, TLR9	195	932	16650	2.29036	0.56335	0.0286201	0.0274006
GOTERM_BP_FAT	GO:0030335~positive regulation of cell migration	15	6.35593	0.00022579	JUN, CXCL9, ANGPT1, CCL20, MCAM, ARHGEF39, LEF1, PDGFB, RETN, HDAC9, FGR, CXCL10, IL23A, PLAU, CGA	195	395	16650	3.24245	0.571703	0.0286201	0.0274006
GOTERM_BP_FAT	GO:0070489~T cell aggregation	16	6.77966	0.000237541	ANXA1, LEF1, NRARP, CD1C, SPN, PPP3CA, CCND3, IL1RL2, TMIGD2, IL23A, MYB, NLRP3, PRKCQ, SOX4, PAG1, SLAMF1	195	446	16650	3.06313	0.590195	0.0286201	0.0274006
GOTERM_BP_FAT	GO:0042110~T cell activation	16	6.77966	0.000237541	ANXA1, LEF1, NRARP, CD1C, SPN, PPP3CA, CCND3, IL1RL2, TMIGD2, IL23A, MYB, NLRP3, PRKCQ, SOX4, PAG1, SLAMF1	195	446	16650	3.06313	0.590195	0.0286201	0.0274006
GOTERM_BP_FAT	GO:0071593~lymphocyte aggregation	16	6.77966	0.000246284	ANXA1, LEF1, NRARP, CD1C, SPN, PPP3CA, CCND3, IL1RL2, TMIGD2, IL23A, MYB, NLRP3, PRKCQ, SOX4, PAG1, SLAMF1	195	447	16650	3.05627	0.603434	0.0286201	0.0274006
GOTERM_BP_FAT	GO:0010604~positive regulation of macromolecule metabolic process	54	22.8814	0.000251087	FOXA1, CSF2, CCL4L2, IKZF1, RORB, IKZF4, SPN, PPP3CA, CCND3, RASSF2, CCND2, MYB, TNFSF10, PIM1, SOX4, IL13, ATP1B4, CBFA2T3, ETV6, PSRC1, IL23A, TLR9, PRKCQ, ATF3, SHC2, CHRNA3, CCL3L1, PCOLCE2, LEF1, PDGFB, NLRC5, RETN, IRAK2, NLRP3, CGA, SLC38A3, SLAMF1, JUN, ANGPT1, CCL20, GADD45A, PTCH1, LIF, MICAL2, INHBA, MAFA, NFATC4, FOSL2, CXCL10, EHD4, KRT17, WT1, ID1, HOXD8	195	2856	16650	1.61441	0.610523	0.0286201	0.0274006
GOTERM_BP_FAT	GO:0007155~cell adhesion	37	15.678	0.000285454	FOXA1, CSTA, AHNAK, LEF1, AMIGO2, NRARP, PCDH12, NID1, CD1C, PCDH18, FGFRL1, SPN, PPP3CA, CCND3, IL1RL2, CDH4, PLAU, SIT1, MYB, DACT2, TNKS1BP1, SLAMF7, NLRP3, SOX4, PAG1, SLAMF1, ANXA1, ANGPT1, MCAM, ATP1B1, TMIGD2, EHD4, IL23A, COL5A3, ID1, PRKCQ, FERMT2	195	1699	16650	1.85946	0.657687	0.0286201	0.0274006
GOTERM_BP_FAT	GO:0001934~positive regulation of protein phosphorylation	24	10.1695	0.000285916	JUN, CHRNA3, SHC2, CSF2, CCL3L1, ANGPT1, GADD45A, CCL20, CCL4L2, IL13, PDGFB, LIF, INHBA, SPN, CCND3, RASSF2, PSRC1, EHD4, CCND2, IRAK2, IL23A, PIM1, TLR9, SLAMF1	195	890	16650	2.30251	0.658282	0.0286201	0.0274006
GOTERM_BP_FAT	GO:0070486~leukocyte aggregation	16	6.77966	0.000287565	ANXA1, LEF1, NRARP, CD1C, SPN, PPP3CA, CCND3, IL1RL2, TMIGD2, IL23A, MYB, NLRP3, PRKCQ, SOX4, PAG1, SLAMF1	195	454	16650	3.00915	0.660391	0.0286201	0.0274006
GOTERM_BP_FAT	GO:0002682~regulation of immune system process	32	13.5593	0.0002904	CXCL9, LEF1, NLRC5, NRARP, CD1C, CD1A, SPN, PPP3CA, IL1RL2, RASSF2, IRAK2, SIT1, MYB, SLAMF7, NLRP3, PAG1, SLAMF1, JUN, ANXA1, ANGPT1, CCL20, KRT1, IL13, LIF, INHBA, PARP9, FGR, CXCL10, TMIGD2, IL23A, TLR9, PRKCQ	195	1378	16650	1.98281	0.663988	0.0286201	0.0274006
GOTERM_BP_FAT	GO:0030098~lymphocyte differentiation	13	5.50847	0.000291749	ANXA1, LEF1, NRARP, INHBA, IKZF1, HDAC9, SPN, IL1RL2, IL23A, MYB, NLRP3, SOX4, SLAMF1	195	310	16650	3.58065	0.665686	0.0286201	0.0274006
GOTERM_BP_FAT	GO:0048534~hematopoietic or lymphoid organ development	22	9.32203	0.000299655	JUN, ANXA1, CSF2, ANGPT1, LEF1, PDGFB, LIF, NRARP, INHBA, IKZF1, HDAC9, CBFA2T3, ETV6, SPN, IL1RL2, RASSF2, IL23A, MYB, DACT2, NLRP3, SOX4, SLAMF1	195	778	16650	2.41447	0.675469	0.0286201	0.0274006
GOTERM_BP_FAT	GO:0022610~biological adhesion	37	15.678	0.000305493	FOXA1, CSTA, AHNAK, LEF1, AMIGO2, NRARP, PCDH12, NID1, CD1C, PCDH18, FGFRL1, SPN, PPP3CA, CCND3, IL1RL2, CDH4, PLAU, SIT1, MYB, DACT2, TNKS1BP1, SLAMF7, NLRP3, SOX4, PAG1, SLAMF1, ANXA1, ANGPT1, MCAM, ATP1B1, TMIGD2, EHD4, IL23A, COL5A3, ID1, PRKCQ, FERMT2	195	1705	16650	1.85292	0.682507	0.0286201	0.0274006
GOTERM_BP_FAT	GO:0007166~cell surface receptor signaling pathway	51	21.6102	0.000319518	GABRB3, FOXA1, CXCL9, CSF2, CCL4L2, NRARP, FGFRL1, SIRPB1, SPN, NPPC, PPP3CA, RASSF2, NETO1, TNFSF10, DACT2, SOX4, ANXA1, ARID5B, TMC8, GFRA1, FGR, STX1B, TXNIP, PRKCQ, ATF3, SHC2, CHRNA3, CCL3L1, BCL2A1, GPR87, LEF1, PDGFB, NLRC5, CXXC4, IL1RL2, IRAK2, GPC1, PAG1, SLAMF1, JUN, ANGPT1, CCL20, PTCH1, STYK1, LIF, INHBA, NFATC4, VANGL1, CXCL10, ID1, FERMT2	195	2669	16650	1.63155	0.698801	0.0286201	0.0274006
GOTERM_BP_FAT	GO:2000147~positive regulation of cell motility	15	6.35593	0.00032155	JUN, CXCL9, ANGPT1, CCL20, MCAM, ARHGEF39, LEF1, PDGFB, RETN, HDAC9, FGR, CXCL10, IL23A, PLAU, CGA	195	409	16650	3.13147	0.701091	0.0286201	0.0274006
GOTERM_BP_FAT	GO:0030855~epithelial cell differentiation	18	7.62712	0.000326225	FOXA1, CSTA, JUN, ANXA1, PTCH1, LEF1, IL13, PDGFB, LIF, STC1, FOSL2, KRT17, WT1, ID1, DACT2, TXNIP, ALDOC, SOX4	195	563	16650	2.72988	0.706293	0.0286201	0.0274006
GOTERM_BP_FAT	GO:0051241~negative regulation of multicellular organismal process	26	11.0169	0.00032774	FOXA1, LEF1, NLRC5, PDGFB, STC1, NRARP, RORB, NPPC, PPP3CA, PLAU, NLRP3, CGA, SLAMF1, ANXA1, ANGPT1, PTCH1, KRT1, IL13, INHBA, NFATC4, CXCL10, STX1B, WT1, IL23A, ID1, TLR9	195	1017	16650	2.18289	0.70796	0.0286201	0.0274006
GOTERM_BP_FAT	GO:2000516~positive regulation of CD4-positive, alpha-beta T cell activation	5	2.11864	0.000337821	ANXA1, IL23A, MYB, NLRP3, PRKCQ	195	29	16650	14.7215	0.718812	0.0288299	0.0276015
GOTERM_BP_FAT	GO:0042325~regulation of phosphorylation	32	13.5593	0.000350293	SHC2, CHRNA3, CSF2, CCL3L1, CCL4L2, NLRC5, PDGFB, SPN, CCND3, RASSF2, RGS3, CCND2, IRAK2, PIM1, SH3BP5, SLAMF1, JUN, ANGPT1, CCL20, GADD45A, IL13, LIF, INHBA, CBFA2T3, FGR, CXCL10, PSRC1, EHD4, IL23A, ID1, TLR9, ATF3	195	1393	16650	1.96146	0.731682	0.02923	0.0279845
GOTERM_BP_FAT	GO:0010557~positive regulation of macromolecule biosynthetic process	35	14.8305	0.000396987	FOXA1, CSF2, LEF1, NLRC5, PDGFB, IKZF1, RORB, IKZF4, SPN, PPP3CA, MYB, NLRP3, SLC38A3, CGA, SOX4, JUN, CCL20, PTCH1, LIF, ATP1B4, MICAL2, INHBA, MAFA, ETV6, NFATC4, FOSL2, CXCL10, PSRC1, KRT17, WT1, IL23A, TLR9, PRKCQ, ATF3, HOXD8	195	1597	16650	1.8713	0.774849	0.0310977	0.0297727
GOTERM_BP_FAT	GO:0031328~positive regulation of cellular biosynthetic process	37	15.678	0.000398879	FOXA1, CSF2, LEF1, NLRC5, PDGFB, IKZF1, RORB, IKZF4, SPN, NPPC, PPP3CA, MYB, NLRP3, SLC38A3, CGA, SOX4, JUN, ANXA1, CCL20, PTCH1, LIF, ATP1B4, MICAL2, INHBA, MAFA, ETV6, NFATC4, FOSL2, CXCL10, PSRC1, KRT17, WT1, IL23A, TLR9, PRKCQ, ATF3, HOXD8	195	1729	16650	1.8272	0.776443	0.0310977	0.0297727
GOTERM_BP_FAT	GO:0048608~reproductive structure development	15	6.35593	0.000400434	FOXA1, SPINK2, ANXA1, CSF2, LEF1, PDGFB, LIF, STC1, ARID5B, INHBA, RETN, PCDH12, WT1, TNFSF10, CGA	195	418	16650	3.06404	0.777746	0.0310977	0.0297727
GOTERM_BP_FAT	GO:0051046~regulation of secretion	20	8.47458	0.000405803	RAB3B, CHRNA3, ANXA1, ANGPT1, CYP4F2, IL13, LIF, STC1, C2CD4C, INHBA, RETN, FGR, STX1B, PPP3CA, TLR9, KCNMB4, NLRP3, SGK1, SOX4, SLAMF1	195	683	16650	2.50028	0.782183	0.0310977	0.0297727
GOTERM_BP_FAT	GO:0051272~positive regulation of cellular component movement	15	6.35593	0.000419307	JUN, CXCL9, ANGPT1, CCL20, MCAM, ARHGEF39, LEF1, PDGFB, RETN, HDAC9, FGR, CXCL10, IL23A, PLAU, CGA	195	420	16650	3.04945	0.792957	0.03149	0.0301482
GOTERM_BP_FAT	GO:0046903~secretion	27	11.4407	0.000438481	RAB3B, CHRNA3, CSF2, PDGFB, STC1, RETN, C2CD4C, PPP3CA, KCNMB4, OTOF, NLRP3, CGA, SOX4, SLAMF1, ANXA1, SLC32A1, ANGPT1, CYP4F2, IL13, LIF, INHBA, MAFA, FGR, STX1B, OLFM2, TLR9, SGK1	195	1098	16650	2.09962	0.807345	0.0317027	0.0303518
GOTERM_BP_FAT	GO:0040017~positive regulation of locomotion	15	6.35593	0.000440401	JUN, CXCL9, ANGPT1, CCL20, MCAM, ARHGEF39, LEF1, PDGFB, RETN, HDAC9, FGR, CXCL10, IL23A, PLAU, CGA	195	422	16650	3.035	0.80873	0.0317027	0.0303518
GOTERM_BP_FAT	GO:0061458~reproductive system development	15	6.35593	0.00045068	FOXA1, SPINK2, ANXA1, CSF2, LEF1, PDGFB, LIF, STC1, ARID5B, INHBA, RETN, PCDH12, WT1, TNFSF10, CGA	195	423	16650	3.02782	0.815975	0.0317027	0.0303518
GOTERM_BP_FAT	GO:0051050~positive regulation of transport	24	10.1695	0.00045591	RAB3B, CXCL9, ANXA1, ANGPT1, CYP4F2, PTCH1, IL13, PDGFB, STC1, INHBA, RETN, ATP1B1, FGR, CXCL10, STX1B, PPP3CA, IL23A, TLR9, NLRP3, RHOU, SGK1, SLC38A3, SOX4, SLAMF1	195	920	16650	2.22742	0.819556	0.0317027	0.0303518
GOTERM_BP_FAT	GO:0006954~inflammatory response	19	8.05085	0.000480966	IL22, CXCL9, ANXA1, CCL3L1, CCL20, CCL4L2, KRT1, IL13, HDAC9, NFATC4, SPN, CXCL10, IL1RL2, IRAK2, IL23A, TLR9, NLRP3, PRKCQ, MGLL	195	637	16650	2.54679	0.835766	0.0326109	0.0312214
GOTERM_BP_FAT	GO:0032270~positive regulation of cellular protein metabolic process	32	13.5593	0.000486341	SHC2, CHRNA3, CSF2, CCL3L1, PCOLCE2, CCL4L2, PDGFB, SPN, PPP3CA, CCND3, RASSF2, CCND2, IRAK2, MYB, TNFSF10, PIM1, NLRP3, SOX4, SLAMF1, JUN, ANGPT1, CCL20, GADD45A, IL13, LIF, INHBA, CBFA2T3, PSRC1, EHD4, KRT17, IL23A, TLR9	195	1420	16650	1.92416	0.839049	0.0326109	0.0312214
GOTERM_BP_FAT	GO:0001932~regulation of protein phosphorylation	30	12.7119	0.000533761	SHC2, CHRNA3, CSF2, CCL3L1, CCL4L2, PDGFB, SPN, CCND3, RASSF2, RGS3, CCND2, IRAK2, PIM1, SH3BP5, SLAMF1, JUN, ANGPT1, CCL20, GADD45A, IL13, LIF, INHBA, FGR, CXCL10, PSRC1, EHD4, IL23A, ID1, TLR9, ATF3	195	1300	16650	1.97041	0.865314	0.0351245	0.0336278
GOTERM_BP_FAT	GO:0051240~positive regulation of multicellular organismal process	32	13.5593	0.000554034	FOXA1, CSF2, LEF1, AMIGO2, PDGFB, DBH, RETN, HDAC9, SPN, NPPC, PPP3CA, IL1RL2, CDH4, GPC1, MYB, NLRP3, SLAMF1, JUN, ANXA1, ANGPT1, CCL20, IL13, LIF, INHBA, NFATC4, FGR, TMIGD2, KRT17, WT1, IL23A, TLR9, PRKCQ	195	1431	16650	1.90937	0.875191	0.0351245	0.0336278
GOTERM_BP_FAT	GO:0009891~positive regulation of biosynthetic process	37	15.678	0.000556919	FOXA1, CSF2, LEF1, NLRC5, PDGFB, IKZF1, RORB, IKZF4, SPN, NPPC, PPP3CA, MYB, NLRP3, SLC38A3, CGA, SOX4, JUN, ANXA1, CCL20, PTCH1, LIF, ATP1B4, MICAL2, INHBA, MAFA, ETV6, NFATC4, FOSL2, CXCL10, PSRC1, KRT17, WT1, IL23A, TLR9, PRKCQ, ATF3, HOXD8	195	1760	16650	1.79502	0.876537	0.0351245	0.0336278
GOTERM_BP_FAT	GO:0000578~embryonic axis specification	5	2.11864	0.000561243	WT1, PTCH1, NRARP, CXXC4, HOXD8	195	33	16650	12.9371	0.878527	0.0351245	0.0336278
GOTERM_BP_FAT	GO:1902105~regulation of leukocyte differentiation	11	4.66102	0.000593687	IL1RL2, JUN, RASSF2, ANXA1, IL23A, LEF1, MYB, LIF, NLRP3, NRARP, INHBA	195	244	16650	3.84931	0.892467	0.0352999	0.0337958
GOTERM_BP_FAT	GO:0016477~cell migration	28	11.8644	0.000604948	CXCL9, CCL3L1, CCL4L2, LEF1, PDGFB, STC1, DBH, RETN, HDAC9, SPN, STRIP2, PLAU, CGA, JUN, ANXA1, ANGPT1, CCL20, MCAM, ARHGEF39, STYK1, ARID5B, PARP9, ATP1B1, FGR, CXCL10, IL23A, ID1, PRKCQ	195	1184	16650	2.01923	0.896922	0.0352999	0.0337958
GOTERM_BP_FAT	GO:0002520~immune system development	22	9.32203	0.00060721	JUN, ANXA1, CSF2, ANGPT1, LEF1, PDGFB, LIF, NRARP, INHBA, IKZF1, HDAC9, CBFA2T3, ETV6, SPN, IL1RL2, RASSF2, IL23A, MYB, DACT2, NLRP3, SOX4, SLAMF1	195	821	16650	2.28802	0.897794	0.0352999	0.0337958
GOTERM_BP_FAT	GO:0022407~regulation of cell-cell adhesion	14	5.9322	0.000611051	FOXA1, ANXA1, LEF1, NRARP, SPN, IL1RL2, TMIGD2, SIT1, IL23A, MYB, NLRP3, PRKCQ, PAG1, SLAMF1	195	386	16650	3.09685	0.899258	0.0352999	0.0337958
GOTERM_BP_FAT	GO:0001819~positive regulation of cytokine production	14	5.9322	0.000611051	ANXA1, CSF2, CCL20, IL13, NFATC4, SPN, FGR, IL1RL2, TMIGD2, IL23A, TLR9, NLRP3, PRKCQ, SLAMF1	195	386	16650	3.09685	0.899258	0.0352999	0.0337958
GOTERM_BP_FAT	GO:0051247~positive regulation of protein metabolic process	33	13.9831	0.000637002	SHC2, CHRNA3, CSF2, CCL3L1, PCOLCE2, CCL4L2, PDGFB, SPN, PPP3CA, CCND3, RASSF2, CCND2, IRAK2, MYB, TNFSF10, PIM1, NLRP3, SOX4, SLAMF1, JUN, ANGPT1, CCL20, GADD45A, IL13, LIF, INHBA, CBFA2T3, PSRC1, EHD4, KRT17, IL23A, TLR9, PRKCQ	195	1508	16650	1.8685	0.908618	0.0362415	0.0346973
GOTERM_BP_FAT	GO:1903708~positive regulation of hemopoiesis	9	3.81356	0.000655738	IL1RL2, JUN, ANXA1, IL23A, LEF1, MYB, LIF, NLRP3, INHBA	195	163	16650	4.71449	0.91483	0.0367507	0.0351848
GOTERM_BP_FAT	GO:0022409~positive regulation of cell-cell adhesion	11	4.66102	0.000674627	FOXA1, SPN, IL1RL2, TMIGD2, ANXA1, IL23A, LEF1, MYB, NLRP3, PRKCQ, SLAMF1	195	248	16650	3.78722	0.920665	0.0372533	0.0356659
GOTERM_BP_FAT	GO:0007267~cell-cell signaling	33	13.9831	0.000704855	GABRB3, FOXA1, RAB3B, IL22, CHRNA3, CXCL9, LEF1, PDGFB, NRARP, DBH, RETN, C2CD4C, CXXC4, PPP3CA, NETO1, TNFSF10, KCNMB4, OTOF, CGA, SOX4, ANXA1, SLC32A1, CCL20, IL13, LIF, INHBA, MAFA, NFATC4, VANGL1, CXCL10, STX1B, KCNQ3, FERMT2	195	1517	16650	1.85741	0.929184	0.0380247	0.0364045
GOTERM_BP_FAT	GO:0002548~monocyte chemotaxis	6	2.54237	0.000715077	CXCL10, ANXA1, CCL3L1, CCL20, CCL4L2, PDGFB	195	61	16650	8.39849	0.931852	0.0380247	0.0364045
GOTERM_BP_FAT	GO:0006468~protein phosphorylation	38	16.1017	0.000718976	SPTBN5, SHC2, CHRNA3, PNCK, CSF2, CCL3L1, MAST4, CCL4L2, PDGFB, CAMKK1, SPN, CCND3, RASSF2, RGS3, CCND2, IRAK2, PIM1, SH3BP5, SLAMF1, JUN, ANGPT1, CCL20, GADD45A, IL13, STYK1, LIF, GFRA1, INHBA, FGR, CXCL10, PSRC1, EHD4, IL23A, ID1, TLR9, PRKCQ, SGK1, ATF3	195	1852	16650	1.75195	0.932843	0.0380247	0.0364045
GOTERM_BP_FAT	GO:0051674~localization of cell	30	12.7119	0.000768259	CXCL9, CCL3L1, CCL4L2, LEF1, PDGFB, STC1, DBH, RETN, HDAC9, SPN, STRIP2, PLAU, CGA, JUN, ANXA1, ANGPT1, DNAH17, CCL20, MCAM, ARHGEF39, STYK1, ARID5B, PARP9, ATP1B1, FGR, CXCL10, IL23A, ID1, PRKCQ, SGK1	195	1330	16650	1.92597	0.944197	0.0382136	0.0365853
GOTERM_BP_FAT	GO:0048870~cell motility	30	12.7119	0.000768259	CXCL9, CCL3L1, CCL4L2, LEF1, PDGFB, STC1, DBH, RETN, HDAC9, SPN, STRIP2, PLAU, CGA, JUN, ANXA1, ANGPT1, DNAH17, CCL20, MCAM, ARHGEF39, STYK1, ARID5B, PARP9, ATP1B1, FGR, CXCL10, IL23A, ID1, PRKCQ, SGK1	195	1330	16650	1.92597	0.944197	0.0382136	0.0365853
GOTERM_BP_FAT	GO:0050863~regulation of T cell activation	12	5.08475	0.000783926	SPN, IL1RL2, TMIGD2, ANXA1, SIT1, IL23A, MYB, NLRP3, NRARP, PRKCQ, PAG1, SLAMF1	195	299	16650	3.42681	0.947387	0.0382136	0.0365853
GOTERM_BP_FAT	GO:0098602~single organism cell adhesion	21	8.89831	0.000784706	FOXA1, CSTA, ANXA1, LEF1, NRARP, CD1C, FGFRL1, SPN, PPP3CA, CCND3, IL1RL2, TMIGD2, SIT1, IL23A, MYB, NLRP3, PRKCQ, SOX4, FERMT2, PAG1, SLAMF1	195	779	16650	2.30177	0.947541	0.0382136	0.0365853
GOTERM_BP_FAT	GO:0045737~positive regulation of cyclin-dependent protein serine/threonine kinase activity	5	2.11864	0.000786214	CCND3, PSRC1, CCND2, PDGFB, PIM1	195	36	16650	11.859	0.947838	0.0382136	0.0365853
GOTERM_BP_FAT	GO:0043269~regulation of ion transport	17	7.20339	0.000788772	CHRNA3, CXCL9, AHNAK, CYP4F2, IL13, PDGFB, KCNJ15, STC1, KCNA6, ATP1B1, REPIN1, CXCL10, KCNQ3, TLR9, SGK1, SLC38A3, PTPN3	195	554	16650	2.62011	0.948337	0.0382136	0.0365853
GOTERM_BP_FAT	GO:0050865~regulation of cell activation	16	6.77966	0.000799907	ANXA1, IL13, PDGFB, NRARP, INHBA, SPN, FGR, IL1RL2, TMIGD2, SIT1, IL23A, MYB, NLRP3, PRKCQ, PAG1, SLAMF1	195	501	16650	2.72685	0.950454	0.0382136	0.0365853
GOTERM_BP_FAT	GO:0051049~regulation of transport	37	15.678	0.000808595	RAB3B, CHRNA3, CXCL9, AHNAK, PDGFB, STC1, RETN, KCNA6, C2CD4C, UBE2J1, REPIN1, PPP3CA, KCNMB4, NLRP3, SLC38A3, SOX4, SLAMF1, ANXA1, ANGPT1, CYP4F2, PTCH1, IL13, LIF, KCNJ15, INHBA, ATP1B1, FGR, REEP1, CXCL10, STX1B, EHD4, IL23A, KCNQ3, TLR9, RHOU, SGK1, PTPN3	195	1796	16650	1.75904	0.952046	0.0382136	0.0365853
GOTERM_BP_FAT	GO:0040011~locomotion	33	13.9831	0.000814137	SPTBN5, CXCL9, CCL3L1, CCL4L2, LEF1, PDGFB, STC1, DBH, RETN, HDAC9, SPN, CDH4, STRIP2, PLAU, GPC1, CGA, JUN, ANXA1, ANGPT1, DNAH17, CCL20, MCAM, ARHGEF39, STYK1, ARID5B, PARP9, ATP1B1, FGR, CXCL10, IL23A, ID1, PRKCQ, SGK1	195	1530	16650	1.84163	0.953034	0.0382136	0.0365853
GOTERM_BP_FAT	GO:1902107~positive regulation of leukocyte differentiation	8	3.38983	0.000865329	IL1RL2, JUN, ANXA1, IL23A, LEF1, MYB, LIF, NLRP3	195	131	16650	5.21433	0.961254	0.0401149	0.0384056
GOTERM_BP_FAT	GO:0035710~CD4-positive, alpha-beta T cell activation	6	2.54237	0.000956278	ANXA1, IL23A, LEF1, MYB, NLRP3, PRKCQ	195	65	16650	7.88166	0.972472	0.0426873	0.0408684
GOTERM_BP_FAT	GO:1903508~positive regulation of nucleic acid-templated transcription	30	12.7119	0.000959882	FOXA1, LEF1, NLRC5, PDGFB, IKZF1, RORB, IKZF4, PPP3CA, MYB, NLRP3, SLC38A3, CGA, SOX4, JUN, PTCH1, LIF, ATP1B4, MICAL2, INHBA, MAFA, ETV6, NFATC4, FOSL2, CXCL10, PSRC1, WT1, IL23A, TLR9, ATF3, HOXD8	195	1349	16650	1.89884	0.972842	0.0426873	0.0408684
GOTERM_BP_FAT	GO:0045893~positive regulation of transcription, DNA-templated	30	12.7119	0.000959882	FOXA1, LEF1, NLRC5, PDGFB, IKZF1, RORB, IKZF4, PPP3CA, MYB, NLRP3, SLC38A3, CGA, SOX4, JUN, PTCH1, LIF, ATP1B4, MICAL2, INHBA, MAFA, ETV6, NFATC4, FOSL2, CXCL10, PSRC1, WT1, IL23A, TLR9, ATF3, HOXD8	195	1349	16650	1.89884	0.972842	0.0426873	0.0408684
GOTERM_BP_FAT	GO:1904031~positive regulation of cyclin-dependent protein kinase activity	5	2.11864	0.000967511	CCND3, PSRC1, CCND2, PDGFB, PIM1	195	38	16650	11.2348	0.97361	0.0426873	0.0408684
GOTERM_BP_FAT	GO:0016310~phosphorylation	43	18.2203	0.00097766	SPTBN5, SHC2, CHRNA3, PNCK, CSF2, CCL3L1, MAST4, DGKA, CCL4L2, NLRC5, PDGFB, CAMKK1, SPN, CCND3, RASSF2, RGS3, CCND2, IRAK2, PIM1, SH3BP5, TK2, SLAMF1, JUN, ANGPT1, CCL20, GADD45A, IL13, STYK1, LIF, GFRA1, INHBA, CBFA2T3, FGR, CXCL10, PSRC1, EHD4, IL23A, ID1, TLR9, PRKCQ, ALDOC, SGK1, ATF3	195	2229	16650	1.64717	0.974598	0.0426873	0.0408684
GOTERM_BP_FAT	GO:0042035~regulation of cytokine biosynthetic process	7	2.9661	0.00100297	SPN, MAST4, CCL20, TLR9, PRKCQ, INHBA, UBE2J1	195	98	16650	6.0989	0.976903	0.0432719	0.0414281
GOTERM_BP_FAT	GO:1902533~positive regulation of intracellular signal transduction	23	9.74576	0.00101661	IL22, JUN, CXCL9, SHC2, CSF2, CCL3L1, ANGPT1, GADD45A, CCL20, CCL4L2, IL13, PDGFB, LIF, LPAR4, FGR, CXCL10, RASSF2, IRAK2, IL23A, LPAR6, TNFSF10, TLR9, SLAMF1	195	915	16650	2.14628	0.978057	0.0432719	0.0414281
GOTERM_BP_FAT	GO:0022604~regulation of cell morphogenesis	17	7.20339	0.00102562	FOXA1, CHRNA3, ANXA1, LEF1, LIF, SSH3, NFATC4, FGR, PPP3CA, CDH4, FGD5, STRIP2, ID1, UST, GAS2, RHOU, FERMT2	195	568	16650	2.55553	0.978788	0.0432719	0.0414281
GOTERM_BP_FAT	GO:0098609~cell-cell adhesion	27	11.4407	0.00103963	FOXA1, CSTA, AHNAK, LEF1, AMIGO2, NRARP, PCDH12, CD1C, PCDH18, FGFRL1, SPN, PPP3CA, CCND3, IL1RL2, CDH4, SIT1, MYB, TNKS1BP1, NLRP3, SOX4, PAG1, SLAMF1, ANXA1, TMIGD2, EHD4, IL23A, PRKCQ	195	1164	16650	1.98057	0.979876	0.0433756	0.0415274
GOTERM_BP_FAT	GO:0048584~positive regulation of response to stimulus	40	16.9492	0.00107065	FOXA1, IL22, SHC2, CXCL9, CSF2, CCL3L1, CCL4L2, NLRC5, PDGFB, SLA, NRARP, LPAR4, PPP3CA, RASSF2, NETO1, IRAK2, MYB, TNFSF10, NLRP3, SOX4, PAG1, SLAMF1, JUN, ANXA1, ANGPT1, CCL20, GADD45A, KRT1, IL13, LIF, INHBA, NFATC4, FGR, CXCL10, STX1B, IL23A, LPAR6, TLR9, PRKCQ, ATF3	195	2030	16650	1.68246	0.982091	0.044179	0.0422965
GOTERM_BP_FAT	GO:0051249~regulation of lymphocyte activation	14	5.9322	0.00109172	ANXA1, IL13, NRARP, INHBA, SPN, IL1RL2, TMIGD2, SIT1, IL23A, MYB, NLRP3, PRKCQ, PAG1, SLAMF1	195	411	16650	2.90848	0.983455	0.0445587	0.0426601
GOTERM_BP_FAT	GO:0043085~positive regulation of catalytic activity	33	13.9831	0.00111325	SPTBN5, SHC2, CHRNA3, CSF2, CCL3L1, PCOLCE2, CCL4L2, RGS16, PDGFB, PREX2, CCND3, FGD5, RASSF2, RGS3, CCND2, IRAK2, RASGEF1C, TNFSF10, PIM1, NLRP3, JUN, ANGPT1, CCL20, GADD45A, ARHGEF39, GFRA1, ATP1B1, ARHGAP25, FGR, PSRC1, IL23A, TLR9, PRKCQ	195	1559	16650	1.80737	0.984741	0.0449248	0.0430105
GOTERM_BP_FAT	GO:0051100~negative regulation of binding	8	3.38983	0.00112497	PPP3CA, JUN, GZMA, ID1, LEF1, PDGFB, TMC8, NFATC4	195	137	16650	4.98596	0.985399	0.0449248	0.0430105
GOTERM_BP_FAT	GO:1903037~regulation of leukocyte cell-cell adhesion	12	5.08475	0.00113658	SPN, IL1RL2, TMIGD2, ANXA1, SIT1, IL23A, MYB, NLRP3, NRARP, PRKCQ, PAG1, SLAMF1	195	313	16650	3.27353	0.986022	0.0449248	0.0430105
GOTERM_BP_FAT	GO:2000514~regulation of CD4-positive, alpha-beta T cell activation	5	2.11864	0.00117635	ANXA1, IL23A, MYB, NLRP3, PRKCQ	195	40	16650	10.6731	0.987963	0.0460126	0.044052
GOTERM_BP_FAT	GO:0002694~regulation of leukocyte activation	15	6.35593	0.00120142	ANXA1, IL13, NRARP, INHBA, SPN, FGR, IL1RL2, TMIGD2, SIT1, IL23A, MYB, NLRP3, PRKCQ, PAG1, SLAMF1	195	468	16650	2.73669	0.989046	0.0461246	0.0441592
GOTERM_BP_FAT	GO:1902680~positive regulation of RNA biosynthetic process	30	12.7119	0.00120565	FOXA1, LEF1, NLRC5, PDGFB, IKZF1, RORB, IKZF4, PPP3CA, MYB, NLRP3, SLC38A3, CGA, SOX4, JUN, PTCH1, LIF, ATP1B4, MICAL2, INHBA, MAFA, ETV6, NFATC4, FOSL2, CXCL10, PSRC1, WT1, IL23A, TLR9, ATF3, HOXD8	195	1369	16650	1.8711	0.989219	0.0461246	0.0441592
GOTERM_BP_FAT	GO:0022603~regulation of anatomical structure morphogenesis	25	10.5932	0.00121607	FOXA1, CHRNA3, CXCL9, LEF1, NRARP, HDAC9, PPP3CA, FGD5, CDH4, STRIP2, ANXA1, KRT1, LIF, SSH3, NFATC4, FGR, VANGL1, CXCL10, TMIGD2, WT1, ID1, UST, GAS2, RHOU, FERMT2	195	1051	16650	2.03103	0.989633	0.0461246	0.0441592
GOTERM_BP_FAT	GO:0001818~negative regulation of cytokine production	10	4.23729	0.00123479	ANXA1, ANGPT1, IL23A, LEF1, IL13, NLRC5, TLR9, NLRP3, INHBA, SLAMF1	195	223	16650	3.82891	0.990337	0.0463663	0.0443907
GOTERM_BP_FAT	GO:0044093~positive regulation of molecular function	37	15.678	0.00124942	FOXA1, SPTBN5, SHC2, CHRNA3, CSF2, CCL3L1, PCOLCE2, CCL4L2, RGS16, PDGFB, PREX2, PPP3CA, CCND3, FGD5, RASSF2, RGS3, CCND2, IRAK2, RASGEF1C, TNFSF10, PIM1, NLRP3, JUN, ANGPT1, CCL20, GADD45A, ARHGEF39, ARID5B, GFRA1, ATP1B1, ARHGAP25, FGR, PSRC1, IL23A, TLR9, PRKCQ, SGK1	195	1840	16650	1.71697	0.990855	0.0464512	0.0444719
GOTERM_BP_FAT	GO:0000082~G1/S transition of mitotic cell cycle	10	4.23729	0.00127427	PPP3CA, GPR132, ANXA1, CCND2, GADD45A, PIM1, TNKS1BP1, RHOU, INHBA, SOX4	195	224	16650	3.81181	0.99167	0.0469106	0.0449117
GOTERM_BP_FAT	GO:0042089~cytokine biosynthetic process	7	2.9661	0.00129874	SPN, MAST4, CCL20, TLR9, PRKCQ, INHBA, UBE2J1	195	103	16650	5.80284	0.992402	0.0469663	0.0449651
GOTERM_BP_FAT	GO:0000904~cell morphogenesis involved in differentiation	20	8.47458	0.0013008	FOXA1, SPTBN5, CHRNA3, LEF1, LIF, STC1, SSH3, FGFRL1, NFATC4, PREX2, PPP3CA, CDH4, WT1, GPC1, ID1, UST, DACT2, TLR9, PRKCQ, FERMT2	195	753	16650	2.26785	0.992461	0.0469663	0.0449651
GOTERM_BP_FAT	GO:0030155~regulation of cell adhesion	18	7.62712	0.00142726	FOXA1, ANXA1, ANGPT1, LEF1, NRARP, NID1, SPN, IL1RL2, TMIGD2, SIT1, IL23A, PLAU, MYB, DACT2, NLRP3, PRKCQ, PAG1, SLAMF1	195	643	16650	2.39024	0.995314	0.050327	0.0481826
GOTERM_BP_FAT	GO:0042107~cytokine metabolic process	7	2.9661	0.00143408	SPN, MAST4, CCL20, TLR9, PRKCQ, INHBA, UBE2J1	195	105	16650	5.69231	0.995433	0.050327	0.0481826
GOTERM_BP_FAT	GO:0032680~regulation of tumor necrosis factor production	7	2.9661	0.00143408	SPN, ANGPT1, IL23A, TLR9, NFATC4, SLAMF1, UBE2J1	195	105	16650	5.69231	0.995433	0.050327	0.0481826
GOTERM_BP_FAT	GO:0051090~regulation of sequence-specific DNA binding transcription factor activity	13	5.50847	0.00145746	FOXA1, JUN, PTCH1, NLRC5, ARID5B, PPP3CA, IRAK2, ID1, PIM1, TLR9, NLRP3, PRKCQ, SGK1	195	373	16650	2.97587	0.995817	0.0506738	0.0485146
GOTERM_BP_FAT	GO:0045624~positive regulation of T-helper cell differentiation	4	1.69492	0.00153415	ANXA1, IL23A, MYB, NLRP3	195	20	16650	17.0769	0.996865	0.0527972	0.0505476
GOTERM_BP_FAT	GO:0045935~positive regulation of nucleobase-containing compound metabolic process	34	14.4068	0.00154666	FOXA1, CXCL9, CSF2, LEF1, NLRC5, PDGFB, IKZF1, RORB, IKZF4, NPPC, PPP3CA, MYB, NLRP3, SLC38A3, CGA, SOX4, JUN, PTCH1, LIF, ATP1B4, MICAL2, INHBA, MAFA, ETV6, NFATC4, FOSL2, CXCL10, PSRC1, WT1, IL23A, TLR9, PRKCQ, ATF3, HOXD8	195	1658	16650	1.75095	0.997009	0.0527972	0.0505476
GOTERM_BP_FAT	GO:0006928~movement of cell or subcellular component	36	15.2542	0.00156329	SPTBN5, CXCL9, CCL3L1, CCL4L2, LEF1, PDGFB, STC1, DBH, RETN, HDAC9, SPN, CDH4, STRIP2, PLAU, GPC1, KIF1A, CGA, JUN, ANXA1, ANGPT1, DNAH17, CCL20, MCAM, ARHGEF39, IL13, STYK1, ARID5B, PARP9, ATP1B1, FGR, CXCL10, IL23A, ID1, PRKCQ, KIF20A, SGK1	195	1795	16650	1.71245	0.997191	0.0528844	0.050631
GOTERM_BP_FAT	GO:1903555~regulation of tumor necrosis factor superfamily cytokine production	7	2.9661	0.00165696	SPN, ANGPT1, IL23A, TLR9, NFATC4, SLAMF1, UBE2J1	195	108	16650	5.53419	0.998025	0.0555525	0.0531854
GOTERM_BP_FAT	GO:1901700~response to oxygen-containing compound	31	13.1356	0.001693	FOXA1, CXCL9, CSF2, PDGFB, STC1, RORB, DBH, RETN, HDAC9, REPIN1, NPPC, PPP3CA, IRAK2, TNFSF10, PIM1, UGT3A2, NLRP3, SOX4, JUN, ANXA1, CCL20, PTCH1, IL13, DNTT, INHBA, MAFA, CXCL10, WT1, ID1, TXNIP, PRKCQ	195	1466	16650	1.80554	0.998275	0.0562584	0.0538613
GOTERM_BP_FAT	GO:0003014~renal system process	7	2.9661	0.00173681	CHRNA3, CYP4F2, MCAM, PDGFB, STC1, SGK1, CYP4F12	195	109	16650	5.48342	0.998537	0.0568717	0.0544484
GOTERM_BP_FAT	GO:0031401~positive regulation of protein modification process	26	11.0169	0.00174174	SHC2, CHRNA3, CSF2, CCL3L1, CCL4L2, PDGFB, SPN, CCND3, RASSF2, CCND2, IRAK2, MYB, PIM1, SOX4, SLAMF1, JUN, ANGPT1, CCL20, GADD45A, IL13, LIF, INHBA, PSRC1, EHD4, IL23A, TLR9	195	1143	16650	1.94226	0.998564	0.0568717	0.0544484
GOTERM_BP_FAT	GO:0051246~regulation of protein metabolic process	46	19.4915	0.00176725	CSTA, SHC2, CHRNA3, CSF2, CCL3L1, PCOLCE2, MAST4, CCL4L2, LEF1, PDGFB, UBE2J1, SPN, PPP3CA, CCND3, RASSF2, RGS3, CCND2, IRAK2, MYB, TNFSF10, PIM1, SH3BP5, NLRP3, SOX4, SLAMF1, JUN, SPINK2, ANGPT1, CCL20, GADD45A, IL13, LIF, INHBA, CBFA2T3, FGR, CXCL10, PSRC1, EHD4, KRT17, WT1, IL23A, ID1, TLR9, PRKCQ, ATF3, PTPN3	195	2512	16650	1.56357	0.998695	0.0572072	0.0547696
GOTERM_BP_FAT	GO:0043588~skin development	10	4.23729	0.00182708	CSTA, ANXA1, KRT17, COL5A3, KRT1, DACT2, TXNIP, INHBA, KRT9, FOSL2	195	236	16650	3.61799	0.998958	0.0586383	0.0561397
GOTERM_BP_FAT	GO:0002684~positive regulation of immune system process	23	9.74576	0.00187039	JUN, CXCL9, ANXA1, CCL20, KRT1, LEF1, IL13, NLRC5, LIF, INHBA, SPN, FGR, CXCL10, IL1RL2, TMIGD2, IRAK2, IL23A, MYB, TLR9, NLRP3, PRKCQ, PAG1, SLAMF1	195	960	16650	2.04567	0.999115	0.0595197	0.0569836
GOTERM_BP_FAT	GO:0071706~tumor necrosis factor superfamily cytokine production	7	2.9661	0.00190523	SPN, ANGPT1, IL23A, TLR9, NFATC4, SLAMF1, UBE2J1	195	111	16650	5.38462	0.999224	0.0596885	0.0571452
GOTERM_BP_FAT	GO:0045785~positive regulation of cell adhesion	13	5.50847	0.00190749	FOXA1, ANXA1, ANGPT1, LEF1, NID1, SPN, IL1RL2, TMIGD2, IL23A, MYB, NLRP3, PRKCQ, SLAMF1	195	385	16650	2.88312	0.99923	0.0596885	0.0571452
GOTERM_BP_FAT	GO:0006366~transcription from RNA polymerase II promoter	36	15.2542	0.0019781	FOXA1, LEF1, NLRC5, PDGFB, NRARP, IKZF1, RORB, HDAC9, IKZF4, PPP3CA, PCBP3, MYB, NLRP3, SLC38A3, CGA, SOX4, JUN, PTCH1, LIF, ZBTB32, ATP1B4, MICAL2, ARID5B, INHBA, MAFA, ETV6, NFATC4, FOSL2, CXCL10, WT1, IL23A, ID1, TLR9, TXNIP, ATF3, HOXD8	195	1820	16650	1.68893	0.99941	0.0611974	0.0585898
GOTERM_BP_FAT	GO:0051254~positive regulation of RNA metabolic process	30	12.7119	0.0019883	FOXA1, LEF1, NLRC5, PDGFB, IKZF1, RORB, IKZF4, PPP3CA, MYB, NLRP3, SLC38A3, CGA, SOX4, JUN, PTCH1, LIF, ATP1B4, MICAL2, INHBA, MAFA, ETV6, NFATC4, FOSL2, CXCL10, PSRC1, WT1, IL23A, TLR9, ATF3, HOXD8	195	1415	16650	1.81027	0.999432	0.0611974	0.0585898
GOTERM_BP_FAT	GO:0032940~secretion by cell	23	9.74576	0.00202099	RAB3B, CHRNA3, ANXA1, SLC32A1, ANGPT1, IL13, PDGFB, LIF, C2CD4C, INHBA, RETN, MAFA, FGR, STX1B, PPP3CA, OLFM2, TLR9, OTOF, KCNMB4, NLRP3, CGA, SOX4, SLAMF1	195	966	16650	2.03297	0.999498	0.0616978	0.0590688
GOTERM_BP_FAT	GO:0016337~single organismal cell-cell adhesion	19	8.05085	0.00207845	FOXA1, CSTA, ANXA1, LEF1, NRARP, CD1C, SPN, PPP3CA, CCND3, IL1RL2, TMIGD2, SIT1, IL23A, MYB, NLRP3, PRKCQ, SOX4, PAG1, SLAMF1	195	725	16650	2.23767	0.999595	0.0625653	0.0598994
GOTERM_BP_FAT	GO:0006935~chemotaxis	16	6.77966	0.00208273	SPTBN5, CXCL9, ANXA1, CCL3L1, ANGPT1, CCL20, CCL4L2, LEF1, PDGFB, SPN, CXCL10, CDH4, IL23A, PLAU, GPC1, PRKCQ	195	552	16650	2.47492	0.999602	0.0625653	0.0598994
GOTERM_BP_FAT	GO:0042330~taxis	16	6.77966	0.00211923	SPTBN5, CXCL9, ANXA1, CCL3L1, ANGPT1, CCL20, CCL4L2, LEF1, PDGFB, SPN, CXCL10, CDH4, IL23A, PLAU, GPC1, PRKCQ	195	553	16650	2.47044	0.999653	0.0631563	0.0604652
GOTERM_BP_FAT	GO:0042093~T-helper cell differentiation	5	2.11864	0.00215499	ANXA1, IL23A, LEF1, MYB, NLRP3	195	47	16650	9.08347	0.999697	0.0637164	0.0610014
GOTERM_BP_FAT	GO:0008284~positive regulation of cell proliferation	21	8.89831	0.0021946	JUN, ANXA1, CSF2, LEF1, IL13, PDGFB, LIF, NRARP, RETN, FOSL2, SPN, CXCL10, TMIGD2, CCND2, IL23A, ID1, PRKCQ, CGA, SOX4, ATF3, SLAMF1	195	849	16650	2.11199	0.999739	0.0643807	0.0616375
GOTERM_BP_FAT	GO:0044092~negative regulation of molecular function	25	10.5932	0.00222951	PIF1, CSTA, GPR87, LEF1, NLRC5, PDGFB, PPP3CA, RGS3, IRAK2, PIM1, SH3BP5, NLRP3, TMEM132D, JUN, SPINK2, ANXA1, GADD45A, PTCH1, GZMA, IL13, TMC8, NFATC4, ID1, TLR9, TXNIP	195	1100	16650	1.94056	0.999771	0.0648976	0.0621323
GOTERM_BP_FAT	GO:0044843~cell cycle G1/S phase transition	10	4.23729	0.00228839	PPP3CA, GPR132, ANXA1, CCND2, GADD45A, PIM1, TNKS1BP1, RHOU, INHBA, SOX4	195	244	16650	3.49937	0.999816	0.0656439	0.0628469
GOTERM_BP_FAT	GO:0051173~positive regulation of nitrogen compound metabolic process	35	14.8305	0.00229011	FOXA1, CXCL9, CSF2, LEF1, NLRC5, PDGFB, IKZF1, RORB, IKZF4, NPPC, PPP3CA, MYB, NLRP3, SLC38A3, CGA, SOX4, JUN, PTCH1, LIF, ATP1B4, MICAL2, INHBA, MAFA, ETV6, NFATC4, FOSL2, CXCL10, PSRC1, KRT17, WT1, IL23A, TLR9, PRKCQ, ATF3, HOXD8	195	1767	16650	1.69126	0.999818	0.0656439	0.0628469
GOTERM_BP_FAT	GO:0003382~epithelial cell morphogenesis	5	2.11864	0.00232975	WT1, ID1, DACT2, LIF, STC1	195	48	16650	8.89423	0.999843	0.0662744	0.0634505
GOTERM_BP_FAT	GO:0002294~CD4-positive, alpha-beta T cell differentiation involved in immune response	5	2.11864	0.00251404	ANXA1, IL23A, LEF1, MYB, NLRP3	195	49	16650	8.71272	0.999921	0.0707778	0.067762
GOTERM_BP_FAT	GO:0000902~cell morphogenesis	27	11.4407	0.00252576	FOXA1, SPTBN5, CHRNA3, LEF1, STC1, FGFRL1, PREX2, PPP3CA, FGD5, CDH4, STRIP2, GPC1, DACT2, ANXA1, LIF, SSH3, NFATC4, FGR, WT1, ID1, UST, TLR9, GAS2, PRKCQ, RHOU, SGK1, FERMT2	195	1240	16650	1.85918	0.999925	0.0707778	0.067762
GOTERM_BP_FAT	GO:0032268~regulation of cellular protein metabolic process	43	18.2203	0.00263196	CSTA, SHC2, CHRNA3, CSF2, CCL3L1, PCOLCE2, CCL4L2, LEF1, PDGFB, SPN, PPP3CA, CCND3, RASSF2, RGS3, CCND2, IRAK2, MYB, TNFSF10, PIM1, SH3BP5, NLRP3, SOX4, SLAMF1, JUN, SPINK2, ANGPT1, CCL20, GADD45A, IL13, LIF, INHBA, CBFA2T3, FGR, CXCL10, PSRC1, EHD4, KRT17, WT1, IL23A, ID1, TLR9, ATF3, PTPN3	195	2346	16650	1.56502	0.99995	0.0726656	0.0695693
GOTERM_BP_FAT	GO:1902531~regulation of intracellular signal transduction	34	14.4068	0.00264898	IL22, SHC2, CXCL9, CSF2, CCL3L1, CCL4L2, PDGFB, LPAR4, PREX2, FGD5, RASSF2, RGS3, IRAK2, TNFSF10, NLRP3, SLAMF1, JUN, ANGPT1, CCL20, GADD45A, ARHGEF39, IL13, LIF, INHBA, ARHGAP25, FGR, CXCL10, IL23A, LPAR6, ID1, TLR9, RHOU, RHOV, ATF3	195	1714	16650	1.69374	0.999953	0.0726656	0.0695693
GOTERM_BP_FAT	GO:0002287~alpha-beta T cell activation involved in immune response	5	2.11864	0.00270809	ANXA1, IL23A, LEF1, MYB, NLRP3	195	50	16650	8.53846	0.999962	0.0726656	0.0695693
GOTERM_BP_FAT	GO:0002293~alpha-beta T cell differentiation involved in immune response	5	2.11864	0.00270809	ANXA1, IL23A, LEF1, MYB, NLRP3	195	50	16650	8.53846	0.999962	0.0726656	0.0695693
GOTERM_BP_FAT	GO:0006796~phosphate-containing compound metabolic process	53	22.4576	0.00271748	CXCL9, CSF2, MAST4, DGKA, CCL4L2, SPN, NPPC, PPP3CA, CCND3, RASSF2, RGS3, CCND2, PIM1, TK2, IL13, GFRA1, ATP1B1, CBFA2T3, FGR, PSRC1, IL23A, TLR9, PRKCQ, ALDOC, SGK1, ATF3, SPTBN5, SHC2, CHRNA3, PNCK, CCL3L1, GPR87, PDGFB, NLRC5, CAMKK1, AGPAT4, IRAK2, SH3BP5, SLAMF1, TMEM132D, JUN, ANGPT1, CCL20, GADD45A, STYK1, LIF, INHBA, SSH3, SGPP2, CXCL10, EHD4, ID1, PTPN3	195	3083	16650	1.46785	0.999963	0.0726656	0.0695693
GOTERM_BP_FAT	GO:2000318~positive regulation of T-helper 17 type immune response	3	1.27119	0.00272927	IL23A, NLRP3, PRKCQ	195	7	16650	36.5934	0.999965	0.0726656	0.0695693
GOTERM_BP_FAT	GO:0030217~T cell differentiation	9	3.81356	0.00273531	SPN, IL1RL2, ANXA1, IL23A, LEF1, MYB, NLRP3, NRARP, SOX4	195	204	16650	3.76697	0.999966	0.0726656	0.0695693
GOTERM_BP_FAT	GO:0060326~cell chemotaxis	10	4.23729	0.00275244	CXCL10, CXCL9, ANXA1, CCL3L1, IL23A, CCL20, CCL4L2, LEF1, PDGFB, PRKCQ	195	251	16650	3.40178	0.999968	0.0726656	0.0695693
GOTERM_BP_FAT	GO:0030334~regulation of cell migration	18	7.62712	0.00276729	JUN, CXCL9, ANXA1, ANGPT1, CCL20, MCAM, ARHGEF39, LEF1, PDGFB, STC1, RETN, HDAC9, FGR, CXCL10, IL23A, PLAU, SGK1, CGA	195	685	16650	2.24368	0.99997	0.0726656	0.0695693
GOTERM_BP_FAT	GO:0006793~phosphorus metabolic process	53	22.4576	0.00283406	CXCL9, CSF2, MAST4, DGKA, CCL4L2, SPN, NPPC, PPP3CA, CCND3, RASSF2, RGS3, CCND2, PIM1, TK2, IL13, GFRA1, ATP1B1, CBFA2T3, FGR, PSRC1, IL23A, TLR9, PRKCQ, ALDOC, SGK1, ATF3, SPTBN5, SHC2, CHRNA3, PNCK, CCL3L1, GPR87, PDGFB, NLRC5, CAMKK1, AGPAT4, IRAK2, SH3BP5, SLAMF1, TMEM132D, JUN, ANGPT1, CCL20, GADD45A, STYK1, LIF, INHBA, SSH3, SGPP2, CXCL10, EHD4, ID1, PTPN3	195	3089	16650	1.465	0.999976	0.0739021	0.0707532
GOTERM_BP_FAT	GO:0000122~negative regulation of transcription from RNA polymerase II promoter	19	8.05085	0.00290514	FOXA1, JUN, PTCH1, LEF1, PDGFB, ZBTB32, ARID5B, NRARP, IKZF1, HDAC9, ETV6, NFATC4, PCBP3, WT1, ID1, MYB, TXNIP, HOXD8, ATF3	195	748	16650	2.16886	0.999982	0.075233	0.0720273
GOTERM_BP_FAT	GO:1903530~regulation of secretion by cell	17	7.20339	0.00292954	RAB3B, CHRNA3, ANXA1, ANGPT1, IL13, LIF, C2CD4C, INHBA, RETN, FGR, STX1B, PPP3CA, TLR9, KCNMB4, NLRP3, SOX4, SLAMF1	195	630	16650	2.30403	0.999984	0.0753452	0.0721348
GOTERM_BP_FAT	GO:0043547~positive regulation of GTPase activity	17	7.20339	0.00311668	SPTBN5, JUN, SHC2, CSF2, CCL3L1, ANGPT1, CCL20, ARHGEF39, RGS16, CCL4L2, PDGFB, GFRA1, ARHGAP25, PREX2, FGD5, RGS3, RASGEF1C	195	634	16650	2.28949	0.999992	0.0796131	0.0762208
GOTERM_BP_FAT	GO:0003006~developmental process involved in reproduction	17	7.20339	0.0032139	FOXA1, SPINK2, ANXA1, CSF2, LEF1, PDGFB, LIF, STC1, ARID5B, INHBA, RETN, PCDH12, UBE2J1, NPPC, WT1, TNFSF10, CGA	195	636	16650	2.28229	0.999994	0.0815419	0.0780674
GOTERM_BP_FAT	GO:0050870~positive regulation of T cell activation	9	3.81356	0.00325965	SPN, IL1RL2, TMIGD2, ANXA1, IL23A, MYB, NLRP3, PRKCQ, SLAMF1	195	210	16650	3.65934	0.999995	0.0821475	0.0786472
GOTERM_BP_FAT	GO:0043372~positive regulation of CD4-positive, alpha-beta T cell differentiation	4	1.69492	0.00332397	ANXA1, IL23A, MYB, NLRP3	195	26	16650	13.1361	0.999996	0.08321	0.0796644
GOTERM_BP_FAT	GO:0046635~positive regulation of alpha-beta T cell activation	5	2.11864	0.0033514	ANXA1, IL23A, MYB, NLRP3, PRKCQ	195	53	16650	8.05515	0.999997	0.0833411	0.0797899
GOTERM_BP_FAT	GO:0002366~leukocyte activation involved in immune response	9	3.81356	0.00345013	FGR, ANXA1, IL23A, LEF1, MYB, IL13, NLRP3, CD1C, SLAMF1	195	212	16650	3.62482	0.999998	0.0852319	0.0816002
GOTERM_BP_FAT	GO:0051336~regulation of hydrolase activity	28	11.8644	0.00350914	CSTA, SPTBN5, SHC2, CSF2, CCL3L1, PCOLCE2, CCL4L2, RGS16, LEF1, PDGFB, PREX2, FGD5, RGS3, RASGEF1C, TNFSF10, NLRP3, TMEM132D, JUN, SPINK2, ANXA1, ANGPT1, CCL20, ARHGEF39, GZMA, GFRA1, ATP1B1, ARHGAP25, TLR9	195	1337	16650	1.78816	0.999998	0.0856009	0.0819534
GOTERM_BP_FAT	GO:0010033~response to organic substance	49	20.7627	0.00351066	GABRB3, FOXA1, IL22, CXCL9, CSF2, CCL4L2, RORB, DBH, FGFRL1, NPPC, PPP3CA, TNFSF10, PIM1, SOX4, ANXA1, IL13, DNTT, PARP9, TLR9, TXNIP, PRKCQ, ATF3, CHRNA3, CCL3L1, LEF1, PDGFB, NLRC5, STC1, RETN, HDAC9, UBE2J1, REPIN1, IL1RL2, IRAK2, GPC1, UGT3A2, NLRP3, CGA, JUN, ANGPT1, CCL20, PTCH1, INHBA, MAFA, CXCL10, EHD4, WT1, ID1, FERMT2	195	2822	16650	1.48258	0.999998	0.0856009	0.0819534
GOTERM_BP_FAT	GO:0043270~positive regulation of ion transport	9	3.81356	0.00356091	CXCL10, CXCL9, CYP4F2, IL13, PDGFB, STC1, ATP1B1, SGK1, SLC38A3	195	213	16650	3.6078	0.999998	0.0858863	0.0822267
GOTERM_BP_FAT	GO:0090280~positive regulation of calcium ion import	5	2.11864	0.00358703	CXCL10, CXCL9, IL13, PDGFB, STC1	195	54	16650	7.90598	0.999999	0.0858863	0.0822267
GOTERM_BP_FAT	GO:0002696~positive regulation of leukocyte activation	11	4.66102	0.00359099	SPN, FGR, IL1RL2, TMIGD2, ANXA1, IL23A, MYB, IL13, NLRP3, PRKCQ, SLAMF1	195	311	16650	3.02003	0.999999	0.0858863	0.0822267
GOTERM_BP_FAT	GO:0023061~signal release	13	5.50847	0.0036392	CHRNA3, ANXA1, SLC32A1, LIF, C2CD4C, INHBA, RETN, MAFA, STX1B, PPP3CA, OTOF, CGA, SOX4	195	417	16650	2.66187	0.999999	0.0863701	0.0826899
GOTERM_BP_FAT	GO:0002263~cell activation involved in immune response	9	3.81356	0.00365878	FGR, ANXA1, IL23A, LEF1, MYB, IL13, NLRP3, CD1C, SLAMF1	195	214	16650	3.59094	0.999999	0.0863701	0.0826899
GOTERM_BP_FAT	GO:0045595~regulation of cell differentiation	31	13.1356	0.00368022	FOXA1, CHRNA3, CXCL9, CSF2, LEF1, PDGFB, NRARP, RORB, HDAC9, NPPC, PPP3CA, IL1RL2, CDH4, RASSF2, GPC1, MYB, NLRP3, JUN, ANXA1, PTCH1, IL13, LIF, INHBA, SSH3, NFATC4, CXCL10, STX1B, OLFM2, IL23A, ID1, UST	195	1544	16650	1.71433	0.999999	0.0863701	0.0826899
GOTERM_BP_FAT	GO:0007167~enzyme linked receptor protein signaling pathway	22	9.32203	0.00380099	JUN, CHRNA3, SHC2, ANGPT1, LEF1, STYK1, PDGFB, LIF, ARID5B, GFRA1, INHBA, FGFRL1, FGR, NPPC, RASSF2, GPC1, ID1, DACT2, TXNIP, PRKCQ, FERMT2, PAG1	195	954	16650	1.96904	0.999999	0.0886503	0.0848729
GOTERM_BP_FAT	GO:0002286~T cell activation involved in immune response	6	2.54237	0.00384039	ANXA1, IL23A, LEF1, MYB, NLRP3, CD1C	195	89	16650	5.75627	0.999999	0.0890164	0.0852234
GOTERM_BP_FAT	GO:0010628~positive regulation of gene expression	33	13.9831	0.00405801	FOXA1, CSF2, LEF1, NLRC5, PDGFB, IKZF1, RORB, IKZF4, PPP3CA, MYB, NLRP3, SLC38A3, CGA, SOX4, JUN, PTCH1, LIF, ATP1B4, MICAL2, INHBA, MAFA, ETV6, NFATC4, FOSL2, CXCL10, PSRC1, KRT17, WT1, IL23A, ID1, TLR9, ATF3, HOXD8	195	1692	16650	1.6653	1	0.0931139	0.0891463
GOTERM_BP_FAT	GO:1903039~positive regulation of leukocyte cell-cell adhesion	9	3.81356	0.00406909	SPN, IL1RL2, TMIGD2, ANXA1, IL23A, MYB, NLRP3, PRKCQ, SLAMF1	195	218	16650	3.52505	1	0.0931139	0.0891463
GOTERM_BP_FAT	GO:0002292~T cell differentiation involved in immune response	5	2.11864	0.00409156	ANXA1, IL23A, LEF1, MYB, NLRP3	195	56	16650	7.62363	1	0.0931139	0.0891463
GOTERM_BP_FAT	GO:0045622~regulation of T-helper cell differentiation	4	1.69492	0.00411734	ANXA1, IL23A, MYB, NLRP3	195	28	16650	12.1978	1	0.0931363	0.0891678
GOTERM_BP_FAT	GO:0006357~regulation of transcription from RNA polymerase II promoter	35	14.8305	0.00419313	FOXA1, LEF1, NLRC5, PDGFB, NRARP, IKZF1, HDAC9, IKZF4, PPP3CA, PCBP3, MYB, NLRP3, SLC38A3, CGA, SOX4, JUN, PTCH1, LIF, ZBTB32, ATP1B4, MICAL2, ARID5B, INHBA, MAFA, ETV6, NFATC4, FOSL2, CXCL10, WT1, IL23A, ID1, TLR9, TXNIP, ATF3, HOXD8	195	1835	16650	1.62859	1	0.0938383	0.0898399
GOTERM_BP_FAT	GO:0000079~regulation of cyclin-dependent protein serine/threonine kinase activity	6	2.54237	0.00422335	CCND3, PSRC1, CCND2, GADD45A, PDGFB, PIM1	195	91	16650	5.62975	1	0.0938383	0.0898399
GOTERM_BP_FAT	GO:0009798~axis specification	6	2.54237	0.00422335	WT1, PTCH1, STC1, NRARP, CXXC4, HOXD8	195	91	16650	5.62975	1	0.0938383	0.0898399
GOTERM_BP_FAT	GO:0001655~urogenital system development	11	4.66102	0.0043904	FOXA1, ANXA1, ANGPT1, WT1, PTCH1, DACT2, PDGFB, LIF, ARID5B, NID1, SOX4	195	320	16650	2.9351	1	0.0964091	0.0923011
GOTERM_BP_FAT	GO:0050867~positive regulation of cell activation	11	4.66102	0.0043904	SPN, FGR, IL1RL2, TMIGD2, ANXA1, IL23A, MYB, IL13, NLRP3, PRKCQ, SLAMF1	195	320	16650	2.9351	1	0.0964091	0.0923011
GOTERM_BP_FAT	GO:1904029~regulation of cyclin-dependent protein kinase activity	6	2.54237	0.00442471	CCND3, PSRC1, CCND2, GADD45A, PDGFB, PIM1	195	92	16650	5.56856	1	0.0965976	0.0924816
GOTERM_BP_FAT	GO:0050671~positive regulation of lymphocyte proliferation	7	2.9661	0.00450992	SPN, TMIGD2, ANXA1, IL23A, IL13, PRKCQ, SLAMF1	195	132	16650	4.52797	1	0.0978888	0.0937178
GOTERM_BP_FAT	GO:0032946~positive regulation of mononuclear cell proliferation	7	2.9661	0.0046783	SPN, TMIGD2, ANXA1, IL23A, IL13, PRKCQ, SLAMF1	195	133	16650	4.49393	1	0.100638	0.0963498
GOTERM_BP_FAT	GO:0050900~leukocyte migration	12	5.08475	0.00469019	SPN, CXCL10, CXCL9, ANXA1, ANGPT1, CCL3L1, IL23A, CCL20, CCL4L2, PDGFB, DBH, ATP1B1	195	376	16650	2.72504	1	0.100638	0.0963498
GOTERM_BP_FAT	GO:0050776~regulation of immune response	21	8.89831	0.00491224	JUN, ANXA1, ANGPT1, KRT1, IL13, NLRC5, CD1C, PARP9, CD1A, SPN, FGR, PPP3CA, IRAK2, IL23A, MYB, TLR9, NLRP3, SLAMF7, PRKCQ, PAG1, SLAMF1	195	912	16650	1.96609	1	0.103525	0.0991134
GOTERM_BP_FAT	GO:0045934~negative regulation of nucleobase-containing compound metabolic process	28	11.8644	0.00491982	FOXA1, PIF1, MAGEL2, GPR87, LEF1, PDGFB, NRARP, IKZF1, RORB, HDAC9, IKZF4, NPPC, PPP3CA, PCBP3, MYB, JUN, PTCH1, GZMA, ZBTB32, ARID5B, CBFA2T3, ETV6, NFATC4, WT1, ID1, TXNIP, ATF3, HOXD8	195	1371	16650	1.74381	1	0.103525	0.0991134
GOTERM_BP_FAT	GO:0009880~embryonic pattern specification	5	2.11864	0.00493499	WT1, PTCH1, NRARP, CXXC4, HOXD8	195	59	16650	7.23598	1	0.103525	0.0991134
GOTERM_BP_FAT	GO:0043367~CD4-positive, alpha-beta T cell differentiation	5	2.11864	0.00493499	ANXA1, IL23A, LEF1, MYB, NLRP3	195	59	16650	7.23598	1	0.103525	0.0991134
GOTERM_BP_FAT	GO:0051345~positive regulation of hydrolase activity	21	8.89831	0.00521387	SPTBN5, JUN, SHC2, CSF2, CCL3L1, PCOLCE2, ANGPT1, CCL20, ARHGEF39, RGS16, CCL4L2, PDGFB, GFRA1, ATP1B1, ARHGAP25, PREX2, FGD5, RGS3, RASGEF1C, TNFSF10, NLRP3	195	917	16650	1.95537	1	0.108476	0.103854
GOTERM_BP_FAT	GO:2000026~regulation of multicellular organismal development	33	13.9831	0.0052288	FOXA1, CHRNA3, LEF1, AMIGO2, PDGFB, NRARP, RETN, HDAC9, PPP3CA, IL1RL2, CDH4, RASSF2, GPC1, MYB, NLRP3, JUN, ANXA1, PTCH1, KRT1, IL13, LIF, INHBA, SSH3, NFATC4, VANGL1, CXCL10, STX1B, TMIGD2, KRT17, WT1, IL23A, ID1, UST	195	1721	16650	1.63724	1	0.108476	0.103854
GOTERM_BP_FAT	GO:1903706~regulation of hemopoiesis	11	4.66102	0.00526902	IL1RL2, JUN, RASSF2, ANXA1, IL23A, LEF1, MYB, LIF, NLRP3, NRARP, INHBA	195	328	16650	2.86351	1	0.10871	0.104078
GOTERM_BP_FAT	GO:0043433~negative regulation of sequence-specific DNA binding transcription factor activity	7	2.9661	0.00539839	IRAK2, PTCH1, ID1, NLRC5, TLR9, PIM1, NLRP3	195	137	16650	4.36272	1	0.11077	0.10605
GOTERM_BP_FAT	GO:2000145~regulation of cell motility	18	7.62712	0.00566824	JUN, CXCL9, ANXA1, ANGPT1, CCL20, MCAM, ARHGEF39, LEF1, PDGFB, STC1, RETN, HDAC9, FGR, CXCL10, IL23A, PLAU, SGK1, CGA	195	736	16650	2.08821	1	0.115675	0.110746
GOTERM_BP_FAT	GO:2000316~regulation of T-helper 17 type immune response	3	1.27119	0.00571532	IL23A, NLRP3, PRKCQ	195	10	16650	25.6154	1	0.115869	0.110931
GOTERM_BP_FAT	GO:0042102~positive regulation of T cell proliferation	6	2.54237	0.00577885	SPN, TMIGD2, ANXA1, IL23A, PRKCQ, SLAMF1	195	98	16650	5.22763	1	0.115869	0.110931
GOTERM_BP_FAT	GO:0070665~positive regulation of leukocyte proliferation	7	2.9661	0.00578741	SPN, TMIGD2, ANXA1, IL23A, IL13, PRKCQ, SLAMF1	195	139	16650	4.29994	1	0.115869	0.110931
GOTERM_BP_FAT	GO:0032989~cellular component morphogenesis	27	11.4407	0.00582413	FOXA1, SPTBN5, CHRNA3, LEF1, STC1, FGFRL1, PREX2, PPP3CA, FGD5, CDH4, STRIP2, GPC1, DACT2, ANXA1, LIF, SSH3, NFATC4, FGR, WT1, ID1, UST, TLR9, GAS2, PRKCQ, RHOU, SGK1, FERMT2	195	1321	16650	1.74518	1	0.115869	0.110931
GOTERM_BP_FAT	GO:0031399~regulation of protein modification process	32	13.5593	0.005832	SHC2, CHRNA3, CSF2, CCL3L1, CCL4L2, PDGFB, SPN, CCND3, RASSF2, RGS3, CCND2, IRAK2, MYB, PIM1, SH3BP5, SOX4, SLAMF1, JUN, ANGPT1, CCL20, GADD45A, IL13, LIF, INHBA, FGR, CXCL10, PSRC1, EHD4, IL23A, ID1, TLR9, ATF3	195	1664	16650	1.64201	1	0.115869	0.110931
GOTERM_BP_FAT	GO:0006811~ion transport	29	12.2881	0.00588879	GABRB3, CHRNA3, CXCL9, AHNAK, SLC22A1, PDGFB, STC1, SLC2A3, KCNA6, REPIN1, PPP3CA, KCNMB4, SLC38A3, ANXA1, SLC32A1, CYP4F2, IL13, NIPA1, KCNJ15, TMC8, ATP1B4, PKDREJ, ATP1B1, CXCL10, SLCO4C1, KCNQ3, TLR9, SGK1, PTPN3	195	1458	16650	1.69832	1	0.116217	0.111265
GOTERM_BP_FAT	GO:0043408~regulation of MAPK cascade	17	7.20339	0.00591142	JUN, SHC2, CCL3L1, ANGPT1, GADD45A, CCL20, CCL4L2, PDGFB, LIF, INHBA, RASSF2, RGS3, IRAK2, ID1, TLR9, ATF3, SLAMF1	195	678	16650	2.14091	1	0.116217	0.111265
GOTERM_BP_FAT	GO:0045619~regulation of lymphocyte differentiation	7	2.9661	0.00598942	IL1RL2, ANXA1, IL23A, MYB, NLRP3, NRARP, INHBA	195	140	16650	4.26923	1	0.117137	0.112146
GOTERM_BP_FAT	GO:0060429~epithelium development	23	9.74576	0.00610961	FOXA1, CSTA, JUN, ANXA1, PTCH1, LEF1, IL13, PDGFB, LIF, MICAL2, STC1, NRARP, INHBA, NFATC4, FOSL2, VANGL1, KRT17, WT1, ID1, DACT2, TXNIP, ALDOC, SOX4	195	1060	16650	1.85269	1	0.118692	0.113634
GOTERM_BP_FAT	GO:0002252~immune effector process	18	7.62712	0.00613214	CXCL9, ANXA1, ANGPT1, KRT1, LEF1, IL13, NLRC5, PRF1, DBH, CD1C, SPN, FGR, CXCL10, IL23A, MYB, NLRP3, SLAMF7, SLAMF1	195	742	16650	2.07132	1	0.118692	0.113634
GOTERM_BP_FAT	GO:0033674~positive regulation of kinase activity	14	5.9322	0.00636666	CHRNA3, SHC2, ANGPT1, GADD45A, PDGFB, FGR, CCND3, RASSF2, PSRC1, CCND2, IRAK2, IL23A, PIM1, TLR9	195	505	16650	2.3671	1	0.122599	0.117375
GOTERM_BP_FAT	GO:0042981~regulation of apoptotic process	28	11.8644	0.00647495	GABRB3, CSF2, BCL2A1, LEF1, AMIGO2, DBH, RASSF2, CCND2, TNFSF10, PIM1, NLRP3, SOX4, JUN, SPINK2, ANXA1, ANGPT1, GADD45A, GZMA, IL13, TMC8, INHBA, NFATC4, WT1, ID1, TXNIP, PRKCQ, SGK1, ATF3	195	1400	16650	1.70769	1	0.123816	0.11854
GOTERM_BP_FAT	GO:0045787~positive regulation of cell cycle	11	4.66102	0.0064958	FOXA1, CCND3, PSRC1, ANXA1, CCND2, GADD45A, LEF1, PDGFB, PIM1, TNKS1BP1, SOX4	195	339	16650	2.77059	1	0.123816	0.11854
GOTERM_BP_FAT	GO:0032640~tumor necrosis factor production	6	2.54237	0.00655514	SPN, IL23A, TLR9, NFATC4, SLAMF1, UBE2J1	195	101	16650	5.07235	1	0.124316	0.119019
[truncated: 379 more rows]
